# Supplementary material for: Systems level mapping of metabolic complexity in Mycobacterium tuberculosis to identify high-value drug targets
Source: J Transl Med. 2014 Oct 11;12:263. doi: 10.1186/s12967-014-0263-5 (PMC4201925; doi:10.1186/s12967-014-0263-5)
Supplement: Additional file 1: Table S1. — ( A - C ) – A) List of reactions, reaction description, formula, genes and subsystem of iOSDD890; B) List of metabolites, metabolite names and charged formula that of iOSDD890; C) List of genes and literature evidence of iOSDD890. Table S2. - List of metabolite-gene connectivity of SBSM in Mtb. Table S3. - Gene reaction connectivity of SBSM in Mtb. Table S4. - Complete list of model genes, active gene and the rpkm value of transcript of active gene. Table S5. - List of Single-Gene knock out essential genes and their literature based validation along with sequence level comparison with human genome and microbiome, the information on availability of PDB structure is also provided. Table S6. - List of ELE essential genes and their literature based validation along with sequence level comparison with human genome and microbiome, the information on availability of PDB structure is also provided. Table S7. - List of MLE essential genes and their literature based validation along with sequence level comparison with human genome and microbiome, the information on availability of PDB structure is also provided. Table S8. - Intracellular concentration of proteins encoded by single-gene knockout, ELE and MLE essential genes. Table S9. ( A - I ) - List of genes belonging to each module along with name, pathway mapping, literature evidence, sequence level comparison with human genome and microbiome along with the availability of PDB structure. Table S10. - List of all the MPG's and metabolite level mapping for each knock out target of all the antibiotics considered in this study. Table S11. - List of MPG’s for knockout of all the genes present in the model. Table S12. - List of 211 Potential genes. [file 12967_2014_263_MOESM1_ESM.xlsx]

## Sheet: Supp_Information
Table.S1(A)	List of reactions, reaction description, formula, genes and subsystem of iOSDD890
Table.S1(B)	List of metabolites, metabolite names and charged formula that of iOSDD890
Tabel.S1( C )	List of genes and literature evidence of iOSDD890
Table.S2	List of metabolite-gene connectivity of SBSM in Mtb
Table.S3	Gene reaction connectivity of SBSM in Mtb
Table.S4	Complete list of model genes, active gene and the rpkm value of transcript of active gene
Table.S5	List of Single-Gene knock out essential genes and their literature based validation along with sequence level comparison with human genome and microbiome, the information on availability of PDB structure is also provided
Table.S6	List of ELE essential genes and their literature based validation along with sequence level comparison with human genome and microbiome, the information on availability of PDB structure is also provided
Table.S7	List of MLE essential genes and their literature based validation along with sequence level comparison with human genome and microbiome, the information on availability of PDB structure is also provided
Table.S8	Intracellular concentration of proteins encoded by single-gene knockout, ELE and MLE essential genes
Table.S9(A-I)	List of genes belonging to each module along with name, pathway mapping, literature evidence, sequence level comparison with human genome and microbiome along with the availabilty of PDB structure
Table.S10	List of all the MPG's and metabolite level mapping for each knock out target of all the antibiotics considered in this study
Table.S11	List of MPG's for knockout of all the genes present in the model
Table.S12	List of 211 Potential genes

## Sheet: Table.S1(A)
Rxn name	Rxn description	Formula	Genes	Subsystem
2AGPEAT160	2 acyl glycerophospho ethanolamine acyltransferase n C160	2agpe160[c] + atp[c] + hdca[c] -> amp[c] + pe160[c] + ppi[c]		Fatty Acid Metabolism
2AGPEAT180	2 acyl glycerophospho ethanolamine acyltransferase n C180	2agpe180[c] + atp[c] + ocdca[c] -> amp[c] + pe180[c] + ppi[c]		Fatty Acid Metabolism
4HTHRS	4 Hydroxy L threonine synthase	h2o[c] + phthr[c] -> 4hthr[c] + pi[c]	Rv1295	Cofactor Metabolism
5DGLCNR	5 dehydro D gluconate reductase	5dglcn[c] + h[c] + nadph[c] <=> glcn[c] + nadp[c]	Rv2573	Pantothenate and CoA Metabolism
AACPS10	acyl acyl carrier protein synthetase tuberculostearic acid	ACP[c] + atp[c] + mocdca[c] -> amp[c] + mstrACP[c] + ppi[c]	Rv3815c	Fatty Acid Metabolism
AACPS11	acyl acyl carrier protein synthetase	4hbz[c] + ACP[c] + atp[c] -> 4hbzACP[c] + amp[c] + ppi[c]		Membrane Metabolism
AACPS3	acyl acyl carrier protein synthetase n C160	ACP[c] + atp[c] + hdca[c] -> amp[c] + palmACP[c] + ppi[c]		Fatty Acid Metabolism
ABTA	4 aminobutyrate transaminase	4abut[c] + akg[c] -> glu-L[c] + sucsal[c]	Rv2589 Rv3290c	Glutamate Metabolism
ACACCT	acetyl CoAacetoacetyl CoA transferase	acac[c] + accoa[c] -> aacoa[c] + ac[c]		Pyruvate Metabolism
ACACT1r	acetyl CoA C acetyltransferase	2 accoa[c] <=> aacoa[c] + coa[c]	Rv1323 Rv1867	Pyruvate Metabolism
ACALDi	acetaldehyde dehydrogenase acetylating	acald[c] + coa[c] + nad[c] -> accoa[c] + h[c] + nadh[c]	Rv3535c	Pyruvate Metabolism
ACBIPGT	Adenosyl cobinamide phosphate guanyltransferase	adocbip[c] + gtp[c] + h[c] -> agdpcbi[c] + ppi[c]	Rv0254c	Cofactor Metabolism
ACCC	Acyl CoA Carboxylase	co2[c] + hexccoa[c] -> chexccoa[c] + h2o[c]	Rv3280	Fatty Acid Metabolism
ACCOACr	acetyl CoA carboxylase reversible reaction	accoa[c] + atp[c] + hco3[c] <=> adp[c] + h[c] + malcoa[c] + pi[c]	Rv0904c Rv1722 Rv3280 Rv3281	Pyruvate Metabolism
ACChex	Hexanoic Acid CoA Ligase	coa[c] + h[c] + hexc[c] -> h2o[c] + hexccoa[c]	Rv3280	Fatty Acid Metabolism
ACGAMPM	phosphoacetylglucosamine mutase	acgam6p[c] <=> acgam1p[c]	Rv3441c	Sugar Metabolism
ACGAMT	UDP N acetylglucosamineundecaprenylphosphate N acetylglucosamine 1 phosphate transferase	uacgam[c] + udcpp[c] -> ump[c] + unaga[c]	Rv1302	Arabinogalactan Synthesis
ACGK	acetylglutamate kinase	acglu[c] + atp[c] -> acg5p[c] + adp[c]	Rv1654	Urea Cycle
ACGS	N acetylglutamate synthase	accoa[c] + glu-L[c] -> acglu[c] + coa[c] + h[c]	Rv1653 Rv2747	Urea Cycle
ACHBS	2 aceto 2 hydroxybutanoate synthase	2obut[c] + h[c] + pyr[c] -> 2ahbut[c] + co2[c]		Valine Leucine and Isoleucine Metabolism
ACKr	acetate kinase	ac[c] + atp[c] -> actp[c] + adp[c]	Rv0409	Pyruvate Metabolism
ACLS	acetolactate synthase	h[c] + 2 pyr[c] -> alac-S[c] + co2[c]	Rv1820 Rv3002c Rv3003c Rv3470c Rv3509c	Valine Leucine and Isoleucine Metabolism
ACODA	acetylornithine deacetylase	acorn[c] + h2o[c] -> ac[c] + orn[c]		Other Amino Acid Metabolism
ACPr	acetate phosphatase	actp[c] + atp[c] -> ac[c] + adp[c]	Rv2922A	Pyruvate Metabolism
ACONT	aconitase	cit[c] <=> icit[c]	Rv1475c	Citric Acid Cycle
ACOTA	acetylornithine transaminase	acorn[c] + akg[c] <=> acg5sa[c] + glu-L[c]	Rv1655	Urea Cycle
ACP1_FMN	acid phosphatase FMN	fmn[c] + h2o[c] -> pi[c] + ribflv[c]	Rv3310	Riboflavin Metabolism
ACPS1	acyl carrier protein synthase	apoACP[c] + coa[c] -> ACP[c] + h[c] + pap[c]	Rv2523c	Pantothenate and CoA Metabolism
ACS	acetyl CoA synthetase	ac[c] + atp[c] + coa[c] -> accoa[c] + amp[c] + ppi[c]	Rv3667	Glycolysis
ACS2	acetyl CoA synthase propionate	atp[c] + coa[c] + ppa[c] -> amp[c] + ppcoa[c] + ppi[c]	Rv3667	Sugar Metabolism
ACYSBMNt	acysbmn transport mtb	acysbmn[c] <=> acysbmn[e]		Transport
ADA	Adenosine deaminase	adn[c] + h2o[c] + h[c] -> ins[c] + nh4[c]	Rv3313c	Purine Metabolism
ADCL	4 aminobenzoate synthase	4adcho[c] -> 4abz[c] + h[c] + pyr[c]	Rv0812	Folate Metabolism
ADCPS1	adenosylcobinamide phosphate synthase	adcobhex[c] + appl[c] + atp[c] -> adocbi[c] + adp[c] + h[c] + pi[c]	Rv2236c	Cofactor Metabolism
ADCPS2	adenosylcobinamide phosphate synthase	adcobhex[c] + applp[c] + atp[c] -> adocbip[c] + adp[c] + h[c] + pi[c]	Rv0254c Rv2236c	Porphyrin Metabolism
ADCS	4 amino 4 deoxychorismate synthase	chor[c] + gln-L[c] -> 4adcho[c] + glu-L[c]	Rv0013 Rv1005c	Folate Metabolism
ADCYRS	adenosylcobyric acid synthase glutamine hydrolysing	adcobdam[c] + 4 atp[c] + 4 gln-L[c] + 4 h2o[c] -> adcobhex[c] + 4 adp[c] + 4 glu-L[c] + 4 h[c] + 4 pi[c]	Rv0255c Rv2848c Rv3713	Porphyrin Metabolism
ADK1	adenylate kinase	amp[c] + atp[c] <=> 2 adp[c]	Rv0733	Purine Metabolism
ADK2	adenylate kinase Inorganic triphosphate	amp[c] + pppi[c] <=> adp[c] + ppi[c]	Rv0733	Purine Metabolism
ADK3	adentylate kinase GTP	amp[c] + gtp[c] <=> adp[c] + gdp[c]	Rv0733	Nucleotide Sugar Metabolism
ADK4	adentylate kinase ITP	amp[c] + itp[c] <=> adp[c] + idp[c]	Rv0733	Nucleotide Sugar Metabolism
ADMDCr	Adenosylmethionine decarboxylase	amet[c] + h[c] <=> ametam[c] + co2[c]		Methionine Metabolism
ADNCYC	adenylate cyclase	atp[c] -> camp[c] + ppi[c]	Rv1264 Rv1318c Rv1319c Rv1320c Rv1625c Rv1647 Rv2212 Rv2435c Rv1120c Rv1900c Rv3377c Rv3645	Purine Metabolism
ADNK1	adenosine kinase	adn[c] + atp[c] -> adp[c] + amp[c] + h[c]	Rv2202c	Nucleotide Sugar Metabolism
ADNK3	adenosine kinase	adn[c] + gtp[c] -> amp[c] + gdp[c] + h[c]	Rv2202c	Nucleotide Sugar Metabolism
ADNK4	adenosine kinase	adn[c] + dgtp[c] -> amp[c] + dgdp[c] + h[c]	Rv2202c	Nucleotide Sugar Metabolism
ADOCBIK	Adenosyl cobinamide kinase	adocbi[c] + atp[c] -> adocbip[c] + adp[c] + h[c]	Rv0254c	Porphyrin Metabolism
ADOCBLS	Adenosylcobalamin 5 phosphate synthase	agdpcbi[c] + rdmbzi[c] -> adocbl[c] + gmp[c] + h[c]	Rv2208	Porphyrin Metabolism
ADPT	adenine phosphoribosyltransferase	ade[c] + prpp[c] -> amp[c] + ppi[c]	Rv2584c	Purine Metabolism
ADSK	adenylyl sulfate kinase	aps[c] + atp[c] -> adp[c] + h[c] + paps[c]	Rv1285 Rv1286	Purine Metabolism
ADSL1r	adenylsuccinate lyase	dcamp[c] <=> amp[c] + fum[c]	Rv0777	Purine Metabolism
ADSL2r	adenylosuccinate lyase	25aics[c] <=> aicar[c] + fum[c]	Rv0777	Purine Metabolism
ADSS	adenylosuccinate synthase	asp-L[c] + gtp[c] + imp[c] -> dcamp[c] + gdp[c] + 2 h[c] + pi[c]	Rv0357c	Purine Metabolism
AFE	arabinofuranosyl extension M tb	agalfragund[c] + arabinan[c] -> arabinanagalfragund[c] + h2o[c]	Rv3794 Rv3795	Arabinogalactan Synthesis
AFTA	arabinofuranosyl transferase M tb	decda-tb[c] + galfragund[c] -> agalfragund[c] + decd-tb[c]	Rv3792	Arabinogalactan Synthesis
AGDC	N acetylglucosamine 6 phosphate deacetylase	acgam6p[c] + h2o[c] -> ac[c] + gam6p[c]	Rv3332	Sugar Metabolism
AGMT	agmatinase	agm[c] + h2o[c] -> ptrc[c] + urea[c]		Glutamate Metabolism
AGPAT160	1 hexadecanoyl sn glycerol 3 phosphate O acyltransferase n C160	1hdecg3p[c] + palmACP[c] -> ACP[c] + pa160[c]	Rv2182c Rv2483c	Fatty Acid Metabolism
AGPAT160190	1 hexadecanoyl sn glycerol 3 phosphate O acyltransferase	1hdecg3p[c] + mstrACP[c] -> ACP[c] + pa160190[c]	Rv2182c Rv2483c	PIM Biosynthesis
AGPAT190	1 hexadecanoyl sn glycerol 3 phosphate O acyltransferase	1msg3p[c] + mstrACP[c] -> ACP[c] + pa190190[c]	Rv2182c Rv2483c	Fatty Acid Metabolism
AGPR	N acetyl g glutamyl phosphate reductase	acg5sa[c] + nadp[c] + pi[c] <=> acg5p[c] + h[c] + nadph[c]	Rv1652	Urea Cycle
AHC	adenosylhomocysteinase	ahcys[c] + h2o[c] <=> adn[c] + hcys-L[c]	Rv3248c	Methionine Metabolism
AHCYSNS	S adenosylhomocysteine nucleosidase	ahcys[c] + h2o[c] -> ade[c] + rhcys[c]	Rv0091	Methionine Metabolism
AHMMPS	4 amino 5 hydroxymethyl 2 methylpyrimidine synthetase	air[c] + 2 h[c] -> 4ahmmp[c] + gcald[c] + pi[c]	Rv0423c	Cofactor Metabolism
AICART	phosphoribosylaminoimidazolecarboxamide formyltransferase	10fthf[c] + aicar[c] <=> fprica[c] + thf[c]	Rv0957	Purine Metabolism
AICART2	phosphoribosylaminoimidazolecarboxamide formyltransferase 2	aicar[c] + atp[c] + for[c] <=> adp[c] + fprica[c] + pi[c]		Purine Metabolism
AIRC2	phosphoribosylaminoimidazole carboxylase	air[c] + atp[c] + hco3[c] -> 5caiz[c] + adp[c] + h[c] + pi[c]		Nucleotide Sugar Metabolism
AIRC3	phosphoribosylaminoimidazole carboxylase mutase rxn	5aizc[c] <=> 5caiz[c]		Nucleotide Sugar Metabolism
AIRCr	phosphoribosylaminoimidazole carboxylase	air[c] + co2[c] <=> 5aizc[c] + h[c]	Rv3257c Rv3275c Rv3276c	Purine Metabolism
AKGDb	oxoglutarate dehydrogenase dihydrolipoamide S succinyltransferase	coa[c] + sdhlam[c] -> dhlam[c] + succoa[c]	Rv2215	Citric Acid Cycle
ALAALAD	D alanine D alanine dipeptidase	alaala[c] + h2o[c] -> 2 ala-D[c]	Rv3330	Membrane Metabolism
ALAALAr	D alanine D alanine ligase reversible	2 ala-D[c] + atp[c] <=> adp[c] + alaala[c] + h[c] + pi[c]	Rv2981c	Arabinogalactan Synthesis
ALAD_L	L alanine dehydrogenase	ala-L[c] + h2o[c] + nad[c] -> h[c] + nadh[c] + nh4[c] + pyr[c]	Rv2780	Other Amino Acid Metabolism
ALAR	alanine racemase	ala-L[c] <=> ala-D[c]	Rv3423c Rv2148c	Arabinogalactan Synthesis
ALATA_L	L alanine transaminase	akg[c] + ala-L[c] <=> glu-L[c] + pyr[c]		Alanine and Aspartate Metabolism
ALAt2r	L alanine reversible transport via proton symport	ala-L[e] + h[e] <=> ala-L[c] + h[c]		Transport
ALDD1	aldehyde dehydrogenase formaldehyde NAD	fald[c] + h2o[c] + nad[c] -> for[c] + 2 h[c] + nadh[c]	Rv1895 Rv2259 Rv3045	Redox Metabolism
ALDD19x	aldehyde dehydrogenase phenylacetaldehyde NAD	h2o[c] + nad[c] + pacald[c] -> 2 h[c] + nadh[c] + pac[c]	Rv2858c	Phenylalanine Tyrosine Tryptophan Metabolism
ALDD2x	aldehyde dehydrogenase acetaldehyde NAD	acald[c] + h2o[c] + nad[c] -> ac[c] + 2 h[c] + nadh[c]	Rv0147 Rv0458 Rv0768 Rv3293	Glycolysis
AMAOTr	adenosylmethionine 8 amino 7 oxononanoate transaminase	8aonn[c] + amet[c] <=> amob[c] + dann[c]	Rv1568	Biotin Metabolism
AMID4	amidase	ad[c] + h2o[c] -> ac[c] + nh4[c]	Rv2363	Other Amino Acid Metabolism
AMMQT6	S adenosylmethione	2dmmq6[c] + amet[c] -> ahcys[c] + h[c] + mqn6[c]		Ubiquinone Metabolism
AMMQT8	S adenosylmethione2 demthylmenaquinone methyltransferase menaquinone 8	2dmmq8[c] + amet[c] + h[c] -> ahcys[c] + mql8[c]	Rv0558	Ubiquinone Metabolism
AMMQT8_2	S adenosylmethione2 demethylmenaquinone methyltransferase	2dmmq8[c] + amet[c] -> ahcys[c] + h[c] + mqn8[c]		Ubiquinone Metabolism
AMPTASECG	alanyl aminopeptidase cys gly	cgly[c] + h2o[c] -> cys-L[c] + gly[c]	Rv2467	Other Amino Acid Metabolism
ANPRT	anthranilate phosphoribosyltransferase	anth[c] + prpp[c] -> ppi[c] + pran[c]	Rv2192c	Phenylalanine Tyrosine Tryptophan Metabolism
ANS	anthranilate synthase	chor[c] + gln-L[c] -> anth[c] + glu-L[c] + h[c] + pyr[c]	Rv1609 Rv2859c	Phenylalanine Tyrosine Tryptophan Metabolism
AOXSr	8 amino 7 oxononanoate synthase	ala-L[c] + h[c] + pmcoa[c] <=> 8aonn[c] + co2[c] + coa[c]	Rv0032 Rv1569	Biotin Metabolism
APATr	B alanine pyruvate aminotransferase	ala-B[c] + pyr[c] <=> ala-L[c] + msa[c]		Alanine and Aspartate Metabolism
APRAUR	5 amino 6 5 phosphoribosylamino uracil reductase	5apru[c] + h[c] + nadph[c] -> 5aprbu[c] + nadp[c]	Rv2671	Riboflavin Metabolism
ARABF	arabinan complex formation M tb	12 arab-D[c] + 8 mharab-D[c] + 12 tarab-D[c] -> arabinan[c] + 32 h2o[c]		Membrane Metabolism
ARABI	arabinose isomerase	arab-D[c] <=> rbl-D[c]		Sugar Metabolism
ARACHTA	transacylase	ACP[c] + arachcoa[c] <=> arachACP[c] + coa[c]		Membrane Metabolism
ARAI	L arabinose isomerase	arab-L[c] <=> rbl-L[c]		Sugar Metabolism
ARB_Dabc	L arabinose transport via ABC system	arab-D[e] + atp[c] + h2o[c] -> adp[c] + arab-D[c] + h[c] + pi[c]		Transport
ARBabc	L arabinose transport via ABC system	arab-L[e] + atp[c] + h2o[c] -> adp[c] + arab-L[c] + h[c] + pi[c]		Transport
ARBt2r	L arabinose transport via proton symport	arab-L[e] + h[e] <=> arab-L[c] + h[c]		Transport
ARGDC	arginine decarboxylase	arg-L[c] + h[c] -> agm[c] + co2[c]	Rv2531c	Glutamate Metabolism
ARGDr	arginine deiminase	arg-L[c] + h2o[c] <=> citr-L[c] + nh4[c]	Rv1001	Arginine and Proline Metabolism
ARGSL	argininosuccinate lyase	argsuc[c] <=> arg-L[c] + fum[c]	Rv1659	Alanine and Aspartate Metabolism
ARGSS	argininosuccinate synthase	asp-L[c] + atp[c] + citr-L[c] -> amp[c] + argsuc[c] + h[c] + ppi[c]	Rv1658	Alanine and Aspartate Metabolism
ARGt5r	L arginine transport via diffusion	arg-L[e] <=> arg-L[c]	Rv2320c	Transport
ARI	arabinose ribose isomerase	arpp[c] <=> prpp[c]		Membrane Metabolism
ASAD	aspartate semialdehyde dehydrogenase	aspsa[c] + nadp[c] + pi[c] <=> 4pasp[c] + h[c] + nadph[c]	Rv3708c	Glycine Serine and Threonine Metabolism
ASNN	L asparaginase	asn-L[c] + h2o[c] -> asp-L[c] + nh4[c]	Rv1538c	Alanine and Aspartate Metabolism
ASNS1	asparagine synthase glutamine hydrolysing	asp-L[c] + atp[c] + gln-L[c] + h2o[c] -> amp[c] + asn-L[c] + glu-L[c] + h[c] + ppi[c]	Rv2201	Alanine and Aspartate Metabolism
ASNt2r	L asparagine reversible transport via proton symport	asn-L[e] + h[e] <=> asn-L[c] + h[c]	Rv0346c Rv2127	Transport
ASP1DC	aspartate 1 decarboxylase	asp-L[c] + h[c] -> ala-B[c] + co2[c]	Rv3601c	Alanine and Aspartate Metabolism
ASPCT	aspartate carbamoyltransferase	asp-L[c] + cbp[c] -> cbasp[c] + h[c] + pi[c]	Rv1380	Pyrimidine Metabolism
ASPK	aspartate kinase	asp-L[c] + atp[c] <=> 4pasp[c] + adp[c]	Rv3709c	Glycine Serine and Threonine Metabolism
ASPO1	L aspartate oxidase	asp-L[c] + h2o[c] + o2[c] -> h2o2[c] + nh4[c] + oaa[c]	Rv1595	Alanine and Aspartate Metabolism
ASPO5	L aspartate oxidase	asp-L[c] + fum[c] -> h[c] + iasp[c] + succ[c]	Rv1595	Alanine and Aspartate Metabolism
ASPTA	aspartate transaminase	akg[c] + asp-L[c] <=> glu-L[c] + oaa[c]	Rv0337c Rv3565	Glutamate Metabolism
ASPt2r	L aspartate reversible transport via proton symport	asp-L[e] + h[e] <=> asp-L[c] + h[c]		Transport
AST	Arginine succinyltransferase	arg-L[c] + succoa[c] -> coa[c] + h[c] + sucarg[c]		Arginine and Proline Metabolism
ATPPRT	ATP phosphoribosyltransferase	atp[c] + prpp[c] -> ppi[c] + prbatp[c]	Rv2121c	Histidine Metabolism
ATPS1	H exporting ATPase	atp[c] + h2o[c] + h[c] -> adp[c] + 2 h[e] + pi[c]	Rv1304 Rv1305 Rv1306 Rv1307 Rv1308 Rv1309 Rv1310 Rv1311	Transport
ATPS4r	ATP synthase four protons for one ATP	adp[c] + 4 h[e] + pi[c] <=> atp[c] + h2o[c] + 3 h[c]	Rv1304 Rv1305 Rv1306 Rv1307 Rv1308 Rv1309 Rv1310 Rv1311	Purine Metabolism
BACCL	biotin acetyl CoA carboxylase ligase	atp[c] + btn[c] + h[c] -> btamp[c] + ppi[c]	Rv3279c	Biotin Metabolism
BALAt2r	beta alanine reversible transport via proton symport	ala-B[e] + h[e] <=> ala-B[c] + h[c]	Rv0522	Transport
BDH	R 3 HydroxybutanoateNAD oxidoreductase	bhb[c] + nad[c] <=> acac[c] + h[c] + nadh[c]		Pyruvate Metabolism
BETALDHx	betaine aldehyde dehydrogenase	betald[c] + h2o[c] + nad[c] -> glyb[c] + 2 h[c] + nadh[c]	Rv0223c	Other Amino Acid Metabolism
BMNMSHS	conjugated mycothiol synthesis	bmn[c] + msh[c] -> bmnmsh[c] + 2 h[c]		Redox Metabolism
BMNt	bimane transport diffusion	bmn[c] <=> bmn[e]		Transport
BPNT	3 5 bisphosphate nucleotidase	h2o[c] + pap[c] -> amp[c] + pi[c]		Other Amino Acid Metabolism
BTS2	biotin synthase ala L producing	cys-L[c] + dtbt[c] <=> ala-L[c] + btn[c] + 2 h[c]	Rv1589	Biotin Metabolism
BTS3r	biotin synthase	dtbt[c] + 2 s[c] <=> btn[c] + h2s[c]	Rv1589	Biotin Metabolism
CAATPS	Ca ATPase	atp[c] + 2 ca2[c] + h2o[c] -> adp[c] + 2 ca2[e] + h[e] + pi[c]	Rv0107c	Transport
CAT	catalase	2 h2o2[c] -> 2 h2o[c] + o2[c]	Rv1908c	Redox Metabolism
CAt4	calcium transport inout via proton antiporter	ca2[c] + h[e] <=> ca2[e] + h[c]	Rv1607	Transport
CBIAT	Cobinamide adenyltransferase	atp[c] + cbi[c] + h[c] <=> adocbi[c] + pppi[c]	Rv2849c	Porphyrin Metabolism
CBLAT	cob I alamin adenosyltransferase	atp[c] + cbl1[c] + h[c] <=> adocbl[c] + pppi[c]	Rv1314c Rv2849c	Porphyrin Metabolism
CBPS	carbamoyl phosphate synthase glutamine hydrolysing	2 atp[c] + gln-L[c] + h2o[c] + hco3[c] -> 2 adp[c] + cbp[c] + glu-L[c] + 2 h[c] + pi[c]	Rv1383 Rv1384	Pyrimidine Metabolism
CDAPPA160	CDP Diacylglycerol pyrophostatase n C160	cdpdhdecg[c] + h2o[c] -> cmp[c] + 2 h[c] + pa160[c]	Rv2289	Membrane Metabolism
CDAPPA160190	CDP Diacylglycerol pyrophostatase C160 C190	cdpc16c19g[c] + h2o[c] -> cmp[c] + 2 h[c] + pa160190[c]	Rv2289	Membrane Metabolism
CDAPPA190	CDP Diacylglycerol pyrophostatase C190	cdpc19c19g[c] + h2o[c] -> cmp[c] + 2 h[c] + pa190190[c]	Rv2289	Membrane Metabolism
CDPMEK	4 cytidine 5 diphospho 2 C methyl D erythritol kinase	4c2me[c] + atp[c] -> 2p4c2me[c] + adp[c] + h[c]	Rv1011	Polyprenyl Metabolism
CDPPT160	CDP diacylglycerol inositon 3 phosphatidyltransferase	cdpdhdecg[c] + inost[c] -> cmp[c] + h[c] + ptd1ino160[c]	Rv2612c	Membrane Metabolism
CDPPT160190	CDP diacylglycerol inositon 3 phosphatidyltransferase	cdpc16c19g[c] + inost[c] -> cmp[c] + h[c] + ptd1ino160190[c]	Rv2612c	PIM Biosynthesis
CHLabc	choline transport via ABC system	atp[c] + chol[e] + h2o[c] -> adp[c] + chol[c] + h[c] + pi[c]	Rv3756c Rv3757c Rv3758c Rv3759c	Transport
CHOLD	choline dehydrogenase	chol[c] + nad[c] -> betald[c] + h[c] + nadh[c]		Other Amino Acid Metabolism
CHORM	chorismate mutase	chor[c] -> pphn[c]	Rv1885c Rv0948c	Phenylalanine Tyrosine Tryptophan Metabolism
CHORS	chorismate synthase	3psme[c] -> chor[c] + pi[c]	Rv2540c	Phenylalanine Tyrosine Tryptophan Metabolism
CHRPL	Chorismate pyruvate lyase	chor[c] -> 4hbz[c] + pyr[c]	Rv2949c	Membrane Metabolism
CIGAMS	cys 1D myo inositol 2 deoxy D glucopyranoside synthase	atp[c] + cys-L[c] + igam[c] -> amp[c] + cigam[c] + 2 h[c] + ppi[c]	Rv2130c	Redox Metabolism
CITLr	Citrate lyase reversible	cit[c] <=> ac[c] + oaa[c]	Rv2498c Rv3075c	Citric Acid Cycle
CITabc	citrate transport via ABC system	atp[c] + cit[e] + h2o[c] -> adp[c] + cit[c] + h[c] + pi[c]		Transport
CLPNS160190	cardiolipin synthase C160 C190 tuberculosis	2 pg160190[c] <=> clpn160190[c] + glyc[c]		Membrane Metabolism
CMCBTFL	carboxymycobactin Fe3 loading	cmcbtt[c] + fe3[e] -> fcmcbtt[c]		Redox Metabolism
CMCBTFU	carboxymycobactin Fe3 unloading	fcmcbtt[c] -> cmcbtt[c] + fe3[c]		Redox Metabolism
CMLDC	4 carboxymuconolactone decarboxylase	2c25dho[c] -> 5odhf2a[c] + co2[c] + h[c]	Rv0771 Rv0464c	Miscellaneous
CO2t	CO2 transporter via diffusion	co2[e] <=> co2[c]		Transport
COAt	CoA transporter	coa[e] <=> coa[c]		Transport
COBALTt5	cobalt transport inout via permease no H	cobalt2[c] <=> cobalt2[e]	Rv1239c	Transport
COCHL	cobaltochelatase	atp[c] + cobalt2[c] + h2o[c] + hgbam[c] -> adp[c] + co2dam[c] + 2 h[c] + pi[c]	Rv2062c	Porphyrin Metabolism
CODH2r	carbon monoxide dehydrogenase acetyl CoA synthase 2	co[c] + 2 fdox[c] + h2o[c] <=> co2[c] + 2 fdred[c] + 2 h[c]	Rv0373c Rv0374c Rv0375c	Redox Metabolism
CODH3	carbon monoxide dehydrogenase acetyl CoA synthase 2	adfdOX[c] + 2 co[c] + 2 h2o[c] -> adfdRD[c] + 2 co2[c] + 2 h[c]	Rv0373c Rv0374c Rv0375c	Redox Metabolism
COt	CO transporter via diffusion	co[c] <=> co[e]		Transport
CPC2MT	precorrin 2 C20 methyltransferase	amet[c] + copre2[c] -> ahcys[c] + copre3[c] + h[c]	Rv2066	Porphyrin Metabolism
CPC3MT	precorrin 3B C17 methyltransferase	amet[c] + copre3[c] -> ahcys[c] + copre4[c]	Rv2066	Porphyrin Metabolism
CPC4MT	precorrin 4 C11 methyltransferase	amet[c] + copre4[c] -> ahcys[c] + copre5[c] + h[c]	Rv2071c	Porphyrin Metabolism
CPC6MT	precorrin 6Y C5 15 methyltransferase decarboxylating	2 amet[c] + codhpre6[c] -> 2 ahcys[c] + co2[c] + copre8[c] + h[c]	Rv2072c	Porphyrin Metabolism
CPC6R	precorrin 6A reductase	copre6[c] + h[c] + nadph[c] -> codhpre6[c] + nadp[c]	Rv2070c	Porphyrin Metabolism
CPC8MM	precorrin 8X methylmutase	copre8[c] <=> cobya[c]	Rv2065	Porphyrin Metabolism
CPPPGO	coproporphyrinogen oxidase O2 required	cpppg3[c] + 2 h[c] + o2[c] -> 2 co2[c] + 2 h2o[c] + pppg9[c]	Rv2388c	Porphyrin Metabolism
CRNabc	L carnitine transport via ABC system	atp[c] + crn[e] + h2o[c] -> adp[c] + crn[c] + h[c] + pi[c]	Rv3756c Rv3757c Rv3758c Rv3759c	Transport
CS	citrate synthase	accoa[c] + h2o[c] + oaa[c] -> cit[c] + coa[c] + h[c]	Rv0889c Rv0896 Rv1131	Citric Acid Cycle
CTPS1	CTP synthase NH3	atp[c] + nh4[c] + utp[c] -> adp[c] + ctp[c] + 2 h[c] + pi[c]	Rv1699	Pyrimidine Metabolism
CTPS2	CTP synthase glutamine	atp[c] + gln-L[c] + h2o[c] + utp[c] -> adp[c] + ctp[c] + glu-L[c] + 2 h[c] + pi[c]	Rv1699	Pyrimidine Metabolism
CYANST	Cyanide sulfurtransferase	cyan[c] + tsul[c] -> h[c] + so3[c] + tcynt[c]	Rv3283 Rv0390	Redox Metabolism
CYO1a	cytochrome c reductase ubiquinol 2 protons	2 ficytc[c] + 2 h[c] + qh2[c] -> 2 focytc[c] + 2 h[e] + q[c]	Rv2194 Rv2195 Rv2196	Redox Metabolism
CYO1b	cytochrome c oxidase 2 protons	2 focytc[c] + 0.5 o2[c] -> 2 ficytc[c] + h2o[c]	Rv1451 Rv2193 Rv2200c Rv3043c	Purine Metabolism
CYRDAAT	cob I yrinic acid a c diamide adenosyltransferase	atp[c] + co1dam[c] + h[c] -> adcobdam[c] + pppi[c]	Rv2849c	Cofactor Metabolism
CYRDAR	cob II yrinic acid a c diamide reductase	2 co2dam[c] + nadh[c] -> 2 co1dam[c] + h[c] + nad[c]	Rv0306	Cofactor Metabolism
CYSS	cysteine synthase	acser[c] + h2s[c] -> ac[c] + cys-L[c] + h[c]	Rv0848 Rv1336 Rv2334	Cysteine Metabolism
CYSTGL	cystathionine g lyase	cyst-L[c] + h2o[c] -> 2obut[c] + cys-L[c] + nh4[c]		Methionine Metabolism
CYSTL	cystathionine b lyase	cyst-L[c] + h2o[c] -> hcys-L[c] + nh4[c] + pyr[c]	Rv3340 Rv0075	Methionine Metabolism
CYSTS	cystathionine beta synthase	hcys-L[c] + ser-L[c] -> cyst-L[c] + h2o[c]	Rv1077	Methionine Metabolism
CYTBD	cytochrome oxidase bd ubiquinol 8 2 protons	2 h[c] + 0.5 o2[c] + q8h2[c] -> h2o[c] + 2 h[e] + q8[c]	Rv1620c Rv1621c Rv1622c Rv1623c	Redox Metabolism
CYTBD2	cytochrome oxidase bd menaquinol 8 2 protons	2 h[c] + mql8[c] + 0.5 o2[c] -> h2o[c] + 2 h[e] + mqn8[c]	Rv1620c Rv1621c Rv1622c Rv1623c	Redox Metabolism
CYTD	cytidine deaminase	cytd[c] + h2o[c] + h[c] -> nh4[c] + uri[c]	Rv3315c	Pyrimidine Metabolism
CYTDK2	cytidine kinase GTP	cytd[c] + gtp[c] -> cmp[c] + gdp[c] + h[c]		Nucleotide Sugar Metabolism
CYTDt2r	cytidine transport in via proton symport reversible	cytd[e] + h[e] <=> cytd[c] + h[c]		Transport
CYTK1	cytidylate kinase CMP	atp[c] + cmp[c] <=> adp[c] + cdp[c]	Rv1712	Pyrimidine Metabolism
CYTK2	cytidylate kinase dCMP	atp[c] + dcmp[c] <=> adp[c] + dcdp[c]	Rv1712	Pyrimidine Metabolism
Clt	chlorideion transport out via diffusion	cl[e] <=> cl[c]	Rv0143c	Transport
Cuabc	Copper transport via ABC system	atp[c] + cu2[e] + h2o[c] -> adp[c] + cu2[c] + h[c] + pi[c]	Rv0092 Rv0103c	Transport
Cut1	Copper export via ATPase	atp[c] + cu2[c] + h2o[c] -> adp[c] + cu2[e] + h[c] + pi[c]	Rv0092 Rv0103c	Transport
DADA	Deoxyadenosine deaminase	dad-2[c] + h2o[c] + h[c] -> din[c] + nh4[c]		Nucleotide Sugar Metabolism
DADK	deoxyadenylate kinase	atp[c] + damp[c] <=> adp[c] + dadp[c]		Nucleotide Sugar Metabolism
DAGK160	diacylglycerol kinase n C160	12dgr160[c] + atp[c] -> adp[c] + h[c] + pa160[c]	Rv0499 Rv2252	Fatty Acid Metabolism
DALAOX	D Alanine Oxidase	ala-D[c] + h2o[c] + o2[c] -> h2o2[c] + nh4[c] + pyr[c]	Rv1905c	Other Amino Acid Metabolism
DALAt2r	D alanine transport via proton symport	ala-D[e] + h[e] <=> ala-D[c] + h[c]	Rv1704c	Transport
DAPDC	diaminopimelate decarboxylase	26dap-M[c] + h[c] -> co2[c] + lys-L[c]	Rv1293	Lysine Metabolism
DAPE	diaminopimelate epimerase	26dap-LL[c] <=> 26dap-M[c]	Rv2726c	Lysine Metabolism
DASYN160	CDP diacylglycerol synthetase n C160	ctp[c] + h[c] + pa160[c] -> cdpdhdecg[c] + ppi[c]	Rv2881c	Fatty Acid Metabolism
DASYN160190	CDP diacylglycerol synthetase C160 C190	ctp[c] + h[c] + pa160190[c] -> cdpc16c19g[c] + ppi[c]	Rv2881c Rv2482c	PIM Biosynthesis
DASYN190190	CDP diacylglycerol synthetase C190 C190	ctp[c] + h[c] + pa190190[c] -> cdpc19c19g[c] + ppi[c]	Rv2881c	Membrane Metabolism
DB4PS	3 4 Dihydroxy 2 butanone 4 phosphate synthase	ru5p-D[c] -> db4p[c] + for[c] + h[c]		Cofactor Metabolism
DBTSr	dethiobiotin synthase	atp[c] + co2[c] + dann[c] <=> adp[c] + dtbt[c] + 3 h[c] + pi[c]	Rv1570	Biotin Metabolism
DCPDP	decaprenyl diphosphatase	decdp-tb[c] + h2o[c] -> decd-tb[c] + h[c] + pi[c]	Rv2136c	Polyprenyl Metabolism
DCPDPP	decaprenylphosphoryl ribose phosphate dephosphatase	decdpr-tb[c] + h2o[c] -> decdr-tb[c] + pi[c]	Rv3807c	Arabinogalactan Synthesis
DCPDPP2	decaprenylphosphoryl arabinose phosphate dephosphatase	decdpa-tb[c] + h2o[c] -> decda-tb[c] + pi[c]		Membrane Metabolism
DCPDPS	Decaprenyl diphosphate synthase	frdp[c] + 7 ipdp[c] -> decdp-tb[c] + 7 ppi[c]		Polyprenyl Metabolism
DCPE	decaprenylphosphoryl ribose arabinofuranose isomerization	decdr-tb[c] <=> decda-tb[c]	Rv3790 Rv3791	Arabinogalactan Synthesis
DCPT	phosphoribose transferase undecaprenyl phosphate	decd-tb[c] + prpp[c] -> decdpr-tb[c] + ppi[c]	Rv3806c	Arabinogalactan Synthesis
DCPT2	phosphoribose transferase undecaprenyl phosphate	arpp[c] + decd-tb[c] -> decdpa-tb[c] + ppi[c]		Membrane Metabolism
DCTPD	dCTP deaminase	dctp[c] + h2o[c] + h[c] -> dutp[c] + nh4[c]	Rv0321	Pyrimidine Metabolism
DCTPD2	dCTP deaminase	ctp[c] + h2o[c] + h[c] -> nh4[c] + utp[c]	Rv0321	Pyrimidine Metabolism
DCYTD	deoxycytidine deaminase	dcyt[c] + h2o[c] + h[c] -> duri[c] + nh4[c]		Pyrimidine Metabolism
DDPA	3 deoxy D arabino heptulosonate 7 phosphate synthetase	e4p[c] + h2o[c] + pep[c] -> 2dda7p[c] + pi[c]	Rv2178c	Phenylalanine Tyrosine Tryptophan Metabolism
DESAT16	Palmitoyl CoA desaturase n C160CoA n C161CoA	h[c] + nadph[c] + o2[c] + pmtcoa[c] -> 2 h2o[c] + hdcoa[c] + nadp[c]	Rv3229c	Fatty Acid Metabolism
DESAT18	stearoyl CoA desaturase n C180CoA n C181CoA	h[c] + nadph[c] + o2[c] + stcoa[c] -> 2 h2o[c] + nadp[c] + odecoa[c]	Rv0824c Rv1094	Fatty Acid Metabolism
DGC3D	2 deoxy D gluconate 3 dehydrogenase	2dglcn[c] + nad[c] -> 3ddgc[c] + h[c] + nadh[c]	Rv1714 Rv1928c	Sugar Metabolism
DGK1	deoxyguanylate kinase dGMPATP	atp[c] + dgmp[c] <=> adp[c] + dgdp[c]	Rv1389	Purine Metabolism
DHAD1	dihydroxy acid dehydratase 2 3 dihydroxy 3 methylbutanoate	23dhmb[c] -> 3mob[c] + h2o[c]	Rv0189c	Valine Leucine and Isoleucine Metabolism
DHAD2	Dihydroxy acid dehydratase 2 3 dihydroxy 3 methylpentanoate	23dhmp[c] -> 3mop[c] + h2o[c]		Valine Leucine and Isoleucine Metabolism
DHDPRy	dihydrodipicolinate reductase NADPH	23dhdp[c] + h[c] + nadph[c] -> nadp[c] + thdp[c]	Rv2773c	Lysine Metabolism
DHDPS	dihydrodipicolinate synthase	aspsa[c] + pyr[c] -> 23dhdp[c] + 2 h2o[c] + h[c]	Rv2753c	Lysine Metabolism
DHFR	dihydrofolate reductase	dhf[c] + h[c] + nadph[c] <=> nadp[c] + thf[c]	Rv2763c	Folate Metabolism
DHFS	dihydrofolate synthase	atp[c] + dhpt[c] + glu-L[c] -> adp[c] + dhf[c] + h[c] + pi[c]	Rv2447c	Folate Metabolism
DHNAOT	1 4 dihydroxy 2 naphthoate octaprenyltransferase	dhna[c] + octdp[c] -> 2dmmq8[c] + co2[c] + h[c] + ppi[c]	Rv0534c	Ubiquinone Metabolism
DHNAOT2	1 4 dihydroxy 2 naphthoate octaprenyltransferase	dhna[c] + octdp[c] -> 2dmmq6[c] + co2[c] + h[c] + ppi[c]	Rv0534c	Ubiquinone Metabolism
DHNPA	dihydroneopterin aldolase	dhnpt[c] -> 2ahhmp[c] + gcald[c] + h[c]	Rv3607c	Folate Metabolism
DHNPA2	dihydroneopterin aldolase	dhnpt[c] -> 6hmhpt[c] + gcald[c]	Rv3607c	Folate Metabolism
DHORD2	dihydoorotic acid dehydrogenase quinone8	dhor-S[c] + q8[c] -> orot[c] + q8h2[c]	Rv2139	Pyrimidine Metabolism
DHORD3	dihydroorotic acid dehydrogenase menaquinone 6	dhor-S[c] + mqn6[c] <=> mql6[c] + orot[c]	Rv2139	Pyrimidine Metabolism
DHORD5	dihydroorotic acid menaquinone 8	dhor-S[c] + mqn8[c] -> mql8[c] + orot[c]	Rv2139	Pyrimidine Metabolism
DHORTS	dihydroorotase	dhor-S[c] + h2o[c] <=> cbasp[c] + h[c]	Rv1381	Pyrimidine Metabolism
DHPPDA	diaminohydroxyphosphoribosylaminopyrimidine deaminase	25dhpp[c] + h2o[c] + h[c] -> 5apru[c] + nh4[c]	Rv1409	Riboflavin Metabolism
DHPPDA2	diaminohydroxyphosphoribosylaminopryrimidine deaminase 25drapp	25drapp[c] + h2o[c] + h[c] -> 5apru[c] + nh4[c]	Rv1409	Riboflavin Metabolism
DHPS2	dihydropteroate synthase	4abz[c] + 6hmhptpp[c] -> dhpt[c] + ppi[c]	Rv1207 Rv3608c	Folate Metabolism
DHQD	3 dehydroquinate dehydratase	3dhq[c] <=> 3dhsk[c] + h2o[c]	Rv2537c	Phenylalanine Tyrosine Tryptophan Metabolism
DHQS	3 dehydroquinate synthase	2dda7p[c] -> 3dhq[c] + pi[c]	Rv2538c	Phenylalanine Tyrosine Tryptophan Metabolism
DMATT	dimethylallyltranstransferase	dmpp[c] + ipdp[c] -> grdp[c] + ppi[c]	Rv3398c	Cofactor Metabolism
DMPPS	1 hydroxy 2 methyl 2 E butenyl 4 diphosphate reductase dmpp	h2mb4p[c] + h[c] + nadh[c] -> dmpp[c] + h2o[c] + nad[c]		Cofactor Metabolism
DNMPPA	Dihydroneopterin monophosphate dephosphorylase	dhpmp[c] + h2o[c] -> dhnpt[c] + pi[c]		Folate Metabolism
DNTPPA	Dihydroneopterin triphosphate pyrophosphatase	ahdt[c] + h2o[c] -> dhpmp[c] + h[c] + ppi[c]		Folate Metabolism
DPCOAK	dephospho CoA kinase	atp[c] + dpcoa[c] -> adp[c] + coa[c] + h[c]	Rv1631	Pantothenate and CoA Metabolism
DPPS	decaprenyl synthase	frdp[c] + 7 ipdp[c] -> decdp[c] + 7 ppi[c]		Polyprenyl Metabolism
DPR	2 dehydropantoate 2 reductase	2dhp[c] + h[c] + nadph[c] -> nadp[c] + pant-R[c]	Rv2573	Pantothenate and CoA Metabolism
DRPA	deoxyribose phosphate aldolase	2dr5p[c] -> acald[c] + g3p[c]	Rv0478	Pentose Phosphate Pathway
DSERt2r	D serine transport via proton symport	h[e] + ser-D[e] <=> h[c] + ser-D[c]	Rv1704c	Transport
DTMPK	dTMP kinase	atp[c] + dtmp[c] <=> adp[c] + dtdp[c]	Rv3247c	Pyrimidine Metabolism
DURIK1	deoxyuridine kinase ATPDeoxyuridine	atp[c] + duri[c] -> adp[c] + dump[c] + h[c]		Pyrimidine Metabolism
DURIPP	deoxyuridine phosphorylase	duri[c] + pi[c] <=> 2dr1p[c] + ura[c]		Pyrimidine Metabolism
DUTPDP	dUTP diphosphatase	dutp[c] + h2o[c] -> dump[c] + h[c] + ppi[c]	Rv2697c	Pyrimidine Metabolism
DXPRIi	1 deoxy D xylulose reductoisomerase	dxyl5p[c] + h[c] + nadph[c] -> 2me4p[c] + nadp[c]	Rv2870c	Polyprenyl Metabolism
DXPS	1 deoxy D xylulose 5 phosphate synthase	g3p[c] + h[c] + pyr[c] -> co2[c] + dxyl5p[c]	Rv2682c Rv3379c	Polyprenyl Metabolism
E4PD	Erythrose 4 phosphate dehydrogenase	e4p[c] + h2o[c] + nad[c] <=> 4per[c] + 2 h[c] + nadh[c]		Cofactor Metabolism
ECHH_0	Ech hydrogenase no electron transport	2 fdox[c] + h2[c] <=> 2 fdred[c] + 2 h[c]		Miscellaneous
ENO	enolase	2pg[c] <=> h2o[c] + pep[c]	Rv1023	Glycolysis
ENTCS	enterochelin synthase	3 23dhba[c] + 3 seramp[c] -> 6 amp[c] + enter[c] + 9 h[c]	Rv3214	Glycolysis
ETHAt	ethanolamine transport via diffusion extracellular	etha[e] <=> etha[c]		Transport
EX_acysbmn(e)	acetyl cystine bimane exchange	acysbmn[e] <=>		Exchange
EX_ala_B(e)	beta Alanine exchange	ala-B[e] <=>		Exchange
EX_ala_D(e)	D Alanine exchange	ala-D[e] <=>		Exchange
EX_ala_L(e)	L Alanine exchange	ala-L[e] <=>		Exchange
EX_arab_D(e)	D Arabinose exchange	arab-D[e] <=>		Exchange
EX_arab_L(e)	L Arabinose exchange	arab-L[e] <=>		Exchange
EX_arg_L(e)	L Arginine exchange	arg-L[e] <=>		Exchange
EX_asn_L(e)	L Asparagine exchange	asn-L[e] <=>		Exchange
EX_asp_L(e)	L Aspartate exchange	asp-L[e] <=>		Exchange
EX_atp(e)	ATP exchange	atp[e] <=>		Exchange
EX_bmn(e)	bimane exchange	bmn[e] <=>		Exchange
EX_ca2(e)	Calcium exchange	ca2[e] <=>		Exchange
EX_chol(e)	Choline exchange	chol[e] <=>		Exchange
EX_cit(e)	Citrate exchange	cit[e] <=>		Exchange
EX_cl(e)	Chloride exchange	cl[e] <=>		Exchange
EX_co2(e)	CO2 exchange	co2[e] <=>		Exchange
EX_coa(e)	Coenzyme A exchange	coa[e] <=>		Exchange
EX_cobalt2(e)	Co2 exchange	cobalt2[e] <=>		Exchange
EX_crn(e)	L Carnitine exchange	crn[e] <=>		Exchange
EX_cu2(e)	Cu2 exchange	cu2[e] <=>		Exchange
EX_cytd(e)	Cytidine exchange	cytd[e] <=>		Exchange
EX_etha(e)	Ethanolamine exchange	etha[e] <=>		Exchange
EX_fe2(e)	Fe2 exchange	fe2[e] <=>		Exchange
EX_fe3(e)	Fe3 exchange	fe3[e] <=>		Exchange
EX_fum(e)	Fumarate exchange	fum[e] <=>		Exchange
EX_gal(e)	D Galactose exchange	gal[e] <=>		Exchange
EX_glc(e)	D Glucose exchange	glc-D[e] <=>		Exchange
EX_glu_L(e)	L Glutamate exchange	glu-L[e] <=>		Exchange
EX_gly(e)	Glycine exchange	gly[e] <=>		Exchange
EX_glyb(e)	Glycine betaine exchange	glyb[e] <=>		Exchange
EX_glyc3p(e)	Glycerol 3 phosphate exchange	glyc3p[e] <=>		Exchange
EX_glyc(e)	Glycerol exchange	glyc[e] <=>		Exchange
EX_gthrd(e)	Reduced glutathione exchange	gthrd[e] <=>		Exchange
EX_h2(e)	H2 exchange	h2[e] <=>		Exchange
EX_h2co3(e)	carbonic acid exchange	h2co3[e] <=>		Exchange
EX_h2o(e)	H2O exchange	h2o[e] <=>		Exchange
EX_h2s(e)	Hydrogen sulfide exchange	h2s[e] <=>		Exchange
EX_h(e)	H exchange	h[e] <=>		Exchange
EX_hdca(e)	Hexadecanoate n C160 exchange	hdca[e] <=>		Exchange
EX_his_L(e)	L Histidine exchange	his-L[e] <=>		Exchange
EX_id3acald(e)	Indole 3 acetaldehyde exchange	id3acald[e] <=>		Exchange
EX_ile_L(e)	L Isoleucine exchange	ile-L[e] <=>		Exchange
EX_k(e)	K exchange	k[e] <=>		Exchange
EX_lac_L(e)	L Lactate exchange	lac-L[e] <=>		Exchange
EX_lcts(e)	Lactose exchange	lcts[e] <=>		Exchange
EX_leu_L(e)	L Leucine exchange	leu-L[e] <=>		Exchange
EX_lys_L(e)	L Lysine exchange	lys-L[e] <=>		Exchange
EX_mal_L(e)	L Malate exchange	mal-L[e] <=>		Exchange
EX_malt(e)	Maltose exchange	malt[e] <=>		Exchange
EX_malthp(e)	Maltoheptaose exchange	malthp[e] <=>		Exchange
EX_meoh(e)	methanol exchange	meoh[e] <=>		Exchange
EX_met_L(e)	L Methionine exchange	met-L[e] <=>		Exchange
EX_mg2(e)	Mg exchange	mg2[e] <=>		Exchange
EX_na1(e)	Sodium exchange	na1[e] <=>		Exchange
EX_nh4(e)	Ammonia exchange	nh4[e] <=>		Exchange
EX_no2(e)	Nitrite exchange	no2[e] <=>		Exchange
EX_no3(e)	Nitrate exchange	no3[e] <=>		Exchange
EX_no(e)	Nitric oxide exchange	no[e] <=>		Exchange
EX_o2(e)	O2 exchange	o2[e] <=>		Exchange
EX_ocdca(e)	octadecanoate n C180 exchange	ocdca[e] <=>		Exchange
EX_orn(e)	Ornithine exchange	orn[e] <=>		Exchange
EX_pac(e)	Phenylacetic acid exchange	pac[e] <=>		Exchange
EX_pdima(e)	phthiocerol dimycocerosate A Mtb exchange	pdima[e] <=>		Exchange
EX_phdca(e)	phenol palmitic acid exchange	phdca[e] <=>		Exchange
EX_phe_L(e)	L Phenylalanine exchange	phe-L[e] <=>		Exchange
EX_pi(e)	Phosphate exchange	pi[e] <=>		Exchange
EX_ppa(e)	Propionate exchange	ppa[e] <=>		Exchange
EX_ppdima(e)	phenol phthiocerol dimycocerosate Mtb exchange	ppdima[e] <=>		Exchange
EX_pro_L(e)	L Proline exchange	pro-L[e] <=>		Exchange
EX_pyr(e)	Pyruvate exchange	pyr[e] <=>		Exchange
EX_rib_D(e)	D Ribose exchange	rib-D[e] <=>		Exchange
EX_ser_D(e)	D Serine exchange	ser-D[e] <=>		Exchange
EX_ser_L(e)	L Serine exchange	ser-L[e] <=>		Exchange
EX_skm(e)	Shikimate exchange	skm[e] <=>		Exchange
EX_so4(e)	Sulfate exchange	so4[e] <=>		Exchange
EX_succ(e)	Succinate exchange	succ[e] <=>		Exchange
EX_tartr_L(e)	L tartrate exchange	tartr-L[e] <=>		Exchange
EX_thr_L(e)	L Threonine exchange	thr-L[e] <=>		Exchange
EX_tre(e)	Trehalose exchange	tre[e] <=>		Exchange
EX_trp_L(e)	L Tryptophan exchange	trp-L[e] <=>		Exchange
EX_tsul(e)	Thiosulfate exchange	tsul[e] <=>		Exchange
EX_ttdca(e)	tetradecanoate n C140 exchange	ttdca[e] <=>		Exchange
EX_tyr_L(e)	L Tyrosine exchange	tyr-L[e] <=>		Exchange
EX_val_L(e)	L Valine exchange	val-L[e] <=>		Exchange
EX_xyl_D(e)	D Xylose exchange	xyl-D[e] <=>		Exchange
EX_ac(e)	Acetate exchange	ac[e] <=>		Exchange
EX_4abz(e)	Aminobenzoate exchange	4abz[e] <=>		Exchange
EX_for(e)	Formate exchange	for[e] <=>		Exchange
EX_akg(e)	Oxoglutarate exchange	akg[e] <=>		Exchange
EX_oxa(e)	Oxalate exchange	oxa[e] <=>		Exchange
EX_gua(e)	Guanine exchange	gua[e] <=>		Exchange
EX_ad(e)	Acetamide exchange	ad[e] <=>		Exchange
Adt	Acetamide transport	ad[e] <=> ad[c]		Transport
EX_urea(e)	Urea exchange	urea[e] <=>		Exchange
FACOAE140	fatty acid CoA thioesterase tetradecanoate	h2o[c] + tdcoa[c] -> coa[c] + h[c] + ttdca[c]	Rv1618	Fatty Acid Metabolism
FACOAE160	fatty acid CoA thioesterase hexadecanoate	h2o[c] + pmtcoa[c] -> coa[c] + h[c] + hdca[c]	Rv1618	Fatty Acid Metabolism
FACOAE180	fatty acid CoA thioesterase octadecanoate	h2o[c] + stcoa[c] -> coa[c] + h[c] + ocdca[c]	Rv1618	Fatty Acid Metabolism
FACOAL140	fatty acid CoA ligase tetradecanoate	atp[c] + coa[c] + ttdca[c] <=> amp[c] + ppi[c] + tdcoa[c]	Rv1529 Rv3826	Fatty Acid Metabolism
FACOAL160	fatty acid CoA ligase hexadecanoate	atp[c] + coa[c] + hdca[c] <=> amp[c] + pmtcoa[c] + ppi[c]	Rv1185c Rv1529 Rv2590 Rv3826	Fatty Acid Metabolism
FACOAL161	fatty acid CoA ligase hexadecenoate	atp[c] + coa[c] + hdcea[c] <=> amp[c] + hdcoa[c] + ppi[c]	Rv1529 Rv3826	Fatty Acid Metabolism
FACOAL180	fatty acid CoA ligase octadecanoate	atp[c] + coa[c] + ocdca[c] <=> amp[c] + ppi[c] + stcoa[c]	Rv1529 Rv3826	Fatty Acid Metabolism
FACOAL181	fatty acid CoA ligase octadecenoate	atp[c] + coa[c] + ocdcea[c] <=> amp[c] + odecoa[c] + ppi[c]	Rv1529 Rv1618 Rv3826	Fatty Acid Metabolism
FACOAL200	fatty acid CoA ligase	arach[c] + atp[c] + coa[c] <=> amp[c] + arachcoa[c] + ppi[c]	Rv1529 Rv3826	Membrane Metabolism
FACOAL80	fatty acid CoA ligase octanoate	atp[c] + coa[c] + octa[c] <=> amp[c] + occoa[c] + ppi[c]	Rv1185c Rv1529 Rv2590 Rv3826 Rv0099	Fatty Acid Metabolism
FACOALPHDCA	fatty acid CoA ligase	atp[c] + coa[c] + phdca[c] <=> amp[c] + phdcacoa[c] + ppi[c]		Membrane Metabolism
FACOALPREPH	fatty acid CoA ligase phthiocerol precursor	atp[c] + coa[c] + prephth[c] <=> amp[c] + ppi[c] + prephthcoa[c]	Rv2930	Membrane Metabolism
FAH4	Fatty acid hydroxylase	h[c] + nadph[c] + o2[c] + omtta[c] -> h2o[c] + homtta[c] + nadp[c]		Membrane Metabolism
FAMPL1	Fatty Acid Ligase AMP mycolic acid	amp[c] + h[c] + meroacidcyc2ACP[c] -> ACP[c] + meroacidcyc2AMP[c]	Rv3801c	Mycolic Acid Biosynthesis
FAMPL2	Fatty Acid Ligase AMP mycolic acid	amp[c] + h[c] + mmeroacidcyc2ACP[c] -> ACP[c] + mmeroacidcyc2AMP[c]	Rv3801c	Mycolic Acid Biosynthesis
FAMPL3	Fatty Acid Ligase AMP mycolic acid	amp[c] + h[c] + kmeroacidcyc2ACP[c] -> ACP[c] + kmeroacidcyc2AMP[c]	Rv3801c	Mycolic Acid Biosynthesis
FAMPL4	Fatty Acid Ligase AMP mycolic acid	amp[c] + h[c] + mmmeroacidcyc1ACP[c] -> ACP[c] + mmmeroacidcyc1AMP[c]	Rv3801c	Mycolic Acid Biosynthesis
FAMPL5	Fatty Acid Ligase AMP mycolic acid	amp[c] + h[c] + mkmeroacidcyc1ACP[c] -> ACP[c] + mkmeroacidcyc1AMP[c]	Rv3801c	Mycolic Acid Biosynthesis
FAO1	Fatty acid oxidation tetradecanoate	atp[c] + 7 coa[c] + 6 fad[c] + 6 h2o[c] + 6 nad[c] + ttdca[c] -> 7 accoa[c] + amp[c] + 6 fadh2[c] + 6 h[c] + 6 nadh[c] + ppi[c]	Rv0468 Rv0859 Rv0860 Rv1144 Rv1323	Fatty Acid Metabolism
FAO10	Fatty acid oxidation octadecenoate	atp[c] + 9 coa[c] + 7 fad[c] + 8 h2o[c] + 8 nad[c] + ocdcea[c] -> 9 accoa[c] + amp[c] + 7 fadh2[c] + 8 h[c] + 8 nadh[c] + ppi[c]	Rv0468 Rv0859 Rv0860 Rv1144 Rv1323	Fatty Acid Metabolism
FAO11	Fatty acid oxidation n C161	atp[c] + 8 coa[c] + 6 fad[c] + 7 h2o[c] + hdcea[c] + 7 nad[c] -> 8 accoa[c] + amp[c] + 6 fadh2[c] + 7 h[c] + 7 nadh[c] + ppi[c]	Rv0468 Rv0859 Rv0860 Rv1144 Rv1323	Fatty Acid Metabolism
FAO2	Fatty acid oxidation n C160	atp[c] + 8 coa[c] + 7 fad[c] + 7 h2o[c] + hdca[c] + 7 nad[c] -> 8 accoa[c] + amp[c] + 7 fadh2[c] + 7 h[c] + 7 nadh[c] + ppi[c]	Rv0468 Rv0859 Rv0860 Rv1144 Rv1323	Fatty Acid Metabolism
FAO3	Fatty acid oxidation octadecanoate	atp[c] + 9 coa[c] + 8 fad[c] + 8 h2o[c] + 8 nad[c] + ocdca[c] -> 9 accoa[c] + amp[c] + 8 fadh2[c] + 8 h[c] + 8 nadh[c] + ppi[c]	Rv0468 Rv0859 Rv0860 Rv1144 Rv1323	Fatty Acid Metabolism
FAS100	fatty acid synthase n C100	3 h[c] + malcoa[c] + 2 nadph[c] + octa[c] -> co2[c] + coa[c] + dca[c] + h2o[c] + 2 nadp[c]	Rv1350 Rv1484 Rv2524c Rv2947c	Fatty Acid Metabolism
FAS120	fatty acid synthase n C120	dca[c] + 3 h[c] + malcoa[c] + 2 nadph[c] -> co2[c] + coa[c] + ddca[c] + h2o[c] + 2 nadp[c]	Rv1350 Rv1484 Rv2524c Rv2947c	Fatty Acid Metabolism
FAS140	fatty acid synthase n C140	ddca[c] + 3 h[c] + malcoa[c] + 2 nadph[c] -> co2[c] + coa[c] + h2o[c] + 2 nadp[c] + ttdca[c]	Rv0533c Rv1350 Rv1484 Rv2524c Rv2947c	Fatty Acid Metabolism
FAS160	fatty acid synthase n C160	3 h[c] + malcoa[c] + 2 nadph[c] + ttdca[c] -> co2[c] + coa[c] + h2o[c] + hdca[c] + 2 nadp[c]	Rv1350 Rv1484 Rv2524c Rv2947c	Fatty Acid Metabolism
FAS161	fatty acid synthase n C161	4 h[c] + malcoa[c] + 3 nadph[c] + o2[c] + ttdca[c] -> co2[c] + coa[c] + 3 h2o[c] + hdcea[c] + 3 nadp[c]	Rv1350 Rv1484 Rv2524c Rv2947c	Fatty Acid Metabolism
FAS180	fatty acid synthase n C180	3 h[c] + hdca[c] + malcoa[c] + 2 nadph[c] -> co2[c] + coa[c] + h2o[c] + 2 nadp[c] + ocdca[c]	Rv1350 Rv1484 Rv2524c Rv2947c	Fatty Acid Metabolism
FAS181	fatty acid synthase n C181	4 h[c] + hdca[c] + malcoa[c] + 3 nadph[c] + o2[c] -> co2[c] + coa[c] + 3 h2o[c] + 3 nadp[c] + ocdcea[c]	Rv1350 Rv1484 Rv2524c Rv2947c	Fatty Acid Metabolism
FAS200	fatty acid synthase n C200	3 h[c] + malcoa[c] + 2 nadph[c] + ocdca[c] -> arach[c] + co2[c] + coa[c] + h2o[c] + 2 nadp[c]	Rv1350 Rv1484 Rv2524c Rv2947c	Fatty Acid Metabolism
FAS240_L	fatty acid synthase n C240 lumped reaction	9 h[c] + 3 malcoa[c] + 6 nadph[c] + ocdca[c] -> 3 co2[c] + 3 coa[c] + 3 h2o[c] + 6 nadp[c] + ttc[c]	Rv1350 Rv1484 Rv2524c Rv2947c	Fatty Acid Metabolism
FAS260	fatty acid synthase n C260	3 h[c] + malcoa[c] + 2 nadph[c] + ttc[c] -> co2[c] + coa[c] + h2o[c] + hexc[c] + 2 nadp[c]	Rv1350 Rv1484 Rv2524c Rv2947c	Fatty Acid Metabolism
FAS80_L	fatty acid synthase n C80 lumped reaction	accoa[c] + 8 h[c] + 3 malcoa[c] + 6 nadph[c] -> 3 co2[c] + 4 coa[c] + 2 h2o[c] + 6 nadp[c] + octa[c]	Rv1350 Rv1484 Rv2524c Rv2947c	Fatty Acid Metabolism
FASPHDCA	fatty acyl ACP synthase phdca	4hbzACP[c] + 24 h[c] + 8 malACP[c] + 16 nadph[c] -> 8 ACP[c] + 8 co2[c] + 8 h2o[c] + 16 nadp[c] + phdcaACP[c]		Membrane Metabolism
FASm1601	fatty acid synthase methyl octadecanoic acid	3 h[c] + hdca[c] + mmcoa-S[c] + 2 nadph[c] -> co2[c] + coa[c] + h2o[c] + m1ocdca[c] + 2 nadp[c]	Rv1662 Rv1663	Membrane Metabolism
FASm180	fatty acid synthase tuberculostearic acid	15 h[c] + 4 malcoa[c] + mmcoa-S[c] + 10 nadph[c] + octa[c] -> 5 co2[c] + 5 coa[c] + 5 h2o[c] + mocdca[c] + 10 nadp[c]	Rv1662 Rv1663	Membrane Metabolism
FASm1801	fatty acid synthase dimethyl arachic acid	3 h[c] + m1ocdca[c] + mmcoa-S[c] + 2 nadph[c] -> co2[c] + coa[c] + dmarach[c] + h2o[c] + 2 nadp[c]	Rv1662 Rv1663	Membrane Metabolism
FASm2001	fatty acid synthase tri methyl behenic acid	dmarach[c] + 3 h[c] + mmcoa-S[c] + 2 nadph[c] -> co2[c] + coa[c] + h2o[c] + 2 nadp[c] + tmbhn[c]	Rv1662 Rv1663	Membrane Metabolism
FASm2002	fatty acid synthase methyl arachidic acid	3 h[c] + mmcoa-S[c] + 2 nadph[c] + ocdca[c] -> co2[c] + coa[c] + h2o[c] + marach[c] + 2 nadp[c]	Rv1662 Rv1663	Membrane Metabolism
FASm220	fatty acid synthase methyl behenic acid	arach[c] + 3 h[c] + mmcoa-S[c] + 2 nadph[c] -> co2[c] + coa[c] + h2o[c] + mbhn[c] + 2 nadp[c]	Rv2940c	Membrane Metabolism
FASm2201	fatty acid synthase tri methyl lignoceric acid	3 h[c] + mmcoa-S[c] + 2 nadph[c] + tmbhn[c] -> co2[c] + coa[c] + h2o[c] + 2 nadp[c] + tamlgnc[c]	Rv2940c	Membrane Metabolism
FASm2202	fatty acid synthase di methyl behenic acid	3 h[c] + marach[c] + mmcoa-S[c] + 2 nadph[c] -> co2[c] + coa[c] + dmbhn[c] + h2o[c] + 2 nadp[c]	Rv2940c	Membrane Metabolism
FASm240	fatty acid synthase di methyl lignoceric acid	3 h[c] + mbhn[c] + mmcoa-S[c] + 2 nadph[c] -> co2[c] + coa[c] + dmlgnc[c] + h2o[c] + 2 nadp[c]	Rv2940c	Membrane Metabolism
FASm2401	fatty acid synthase penta methyl hexacosanoic acid	3 h[c] + mmcoa-S[c] + 2 nadph[c] + tamlgnc[c] -> co2[c] + coa[c] + h2o[c] + 2 nadp[c] + pmhexc[c]	Rv2940c	Membrane Metabolism
FASm2402	fatty acid synthase tri methyl lignoceric acid	dmbhn[c] + 3 h[c] + mmcoa-S[c] + 2 nadph[c] -> co2[c] + coa[c] + h2o[c] + 2 nadp[c] + tmlgnc[c]	Rv2940c	Membrane Metabolism
FASm260	fatty acid synthase tri methyl cerotic acid	dmlgnc[c] + 3 h[c] + mmcoa-S[c] + 2 nadph[c] -> co2[c] + coa[c] + h2o[c] + 2 nadp[c] + tmhexc[c]	Rv2940c	Membrane Metabolism
FASm2601	fatty acid synthase hexa methyl octacosanoic acid	3 h[c] + mmcoa-S[c] + 2 nadph[c] + pmhexc[c] -> co2[c] + coa[c] + h2o[c] + hmocta[c] + 2 nadp[c]	Rv2940c	Membrane Metabolism
FASm2602	fatty acid synthase tetra methyl hexacosanoic acid	3 h[c] + mmcoa-S[c] + 2 nadph[c] + tmlgnc[c] -> co2[c] + coa[c] + h2o[c] + 2 nadp[c] + tamhexc[c]	Rv2940c	Membrane Metabolism
FASm280	fatty acid synthase tetra methyl octacosanoic acid	3 h[c] + mmcoa-S[c] + 2 nadph[c] + tmhexc[c] -> co2[c] + coa[c] + h2o[c] + 2 nadp[c] + tamocta[c]	Rv2940c	Membrane Metabolism
FASm2801	fatty acid synthase hepta methyl triacontanoic acid	3 h[c] + hmocta[c] + mmcoa-S[c] + 2 nadph[c] -> co2[c] + coa[c] + h2o[c] + hpmtria[c] + 2 nadp[c]	Rv2940c	Membrane Metabolism
FASm2802	fatty acid synthase penta methyl octacosanoic acid	3 h[c] + mmcoa-S[c] + 2 nadph[c] + tamhexc[c] -> co2[c] + coa[c] + h2o[c] + 2 nadp[c] + pmocta[c]	Rv2940c	Membrane Metabolism
FASm300	fatty acid synthase hexa methyl triacontanoic acid	3 h[c] + mmcoa-S[c] + 2 nadph[c] + pmocta[c] -> co2[c] + coa[c] + h2o[c] + hmtria[c] + 2 nadp[c]	Rv2940c	Membrane Metabolism
FASm3001	fatty acid synthase octa methyl dotriacontanoic acid	3 h[c] + hpmtria[c] + mmcoa-S[c] + 2 nadph[c] -> co2[c] + coa[c] + h2o[c] + 2 nadp[c] + omdtria[c]	Rv2940c	Membrane Metabolism
FASm320	fatty acid synthase hepta methyl dotriacontanoic acid	3 h[c] + hmtria[c] + mmcoa-S[c] + 2 nadph[c] -> co2[c] + coa[c] + h2o[c] + hpmdtria[c] + 2 nadp[c]	Rv2940c	Membrane Metabolism
FASm340	fatty acid synthase octa methyl tetracontatricosanoic acid	3 h[c] + hpmdtria[c] + mmcoa-S[c] + 2 nadph[c] -> co2[c] + coa[c] + h2o[c] + 2 nadp[c] + omtta[c]	Rv2940c	Membrane Metabolism
FBA	fructose bisphosphate aldolase	fdp[c] <=> dhap[c] + g3p[c]	Rv0363c	Glycolysis
FBP	fructose bisphosphatase	fdp[c] + h2o[c] -> f6p[c] + pi[c]	Rv1099c Rv2131c	Glycolysis
FCLPA	L fuculose 1 phosphate aldolase	fc1p[c] <=> dhap[c] + lald-L[c]	Rv0727c	Sugar Metabolism
FCLT	Ferrochelatase	fe2[c] + ppp9[c] -> 2 h[c] + pheme[c]	Rv1485	Porphyrin Metabolism
FCLT2	Ferrochelatase	fmcbtt[c] + ppp9[c] -> 2 h[c] + mcbtt[c] + pheme[c]		Porphyrin Metabolism
FCOAH2	formyl coa hydrolase	forcoa[c] + h2o[c] -> coa[c] + for[c] + h[c]	Rv2605c	Redox Metabolism
FDH	formate dehydrogenase	for[c] + nad[c] <=> co2[c] + nadh[c]	Rv2899c Rv2900c Rv0087	Other Amino Acid Metabolism
FE2abc	iron II transport via ABC system	atp[c] + fe2[e] + h2o[c] -> adp[c] + fe2[c] + h[c] + pi[c]	Rv1348 Rv1349	Transport
FE3Ri	Fe III reduction	fadh2[c] + 2 fe3[c] -> fad[c] + 2 fe2[c] + 2 h[c]		Redox Metabolism
FE3abc	iron III transport via ABC system	atp[c] + fe3[e] + h2o[c] -> adp[c] + fe3[c] + h[c] + pi[c]	Rv1348 Rv1349	Transport
FETRANS	Mycobactin Fe transfer	fmcbtt[c] <=> fe2[c] + mcbtt[c]		Redox Metabolism
FHL	Formate hydrogen lyase	for[c] + h[c] -> co2[c] + h2[c]	Rv0084 Rv2331	Redox Metabolism
FMNAT	FMN adenylyltransferase	atp[c] + fmn[c] + h[c] -> fad[c] + ppi[c]	Rv2786c	Riboflavin Metabolism
FOLD3	dihydropteroate synthase	2ahhmd[c] + 4abz[c] -> dhpt[c] + ppi[c]	Rv1207 Rv3608c	Folate Metabolism
FOLR2	folate reductase	fol[c] + nadph[c] -> dhf[c] + nadp[c]	Rv2763c	Cofactor Metabolism
FOMETR	aminomethyltransferase	5fthf[c] + h[c] <=> h2o[c] + methf[c]	Rv2211c	Cofactor Metabolism
FORMCOAL	formyl coa CoA ligase	atp[c] + coa[c] + for[c] <=> amp[c] + forcoa[c] + ppi[c]		Redox Metabolism
FRD	fumarate reductase	fadh2[c] + fum[c] -> fad[c] + succ[c]	Rv1552 Rv1553 Rv1554 Rv1555	Citric Acid Cycle
FRD2	fumarate reductase	fum[c] + mql8[c] -> mqn8[c] + succ[c]	Rv0247c Rv0248c Rv3316 Rv3317 Rv3318 Rv3319	Citric Acid Cycle
FRD3	fumarate reductase	2dmmql8[c] + fum[c] -> 2dmmq8[c] + succ[c]	Rv0247c Rv0248c Rv3316 Rv3317 Rv3318 Rv3319	Citric Acid Cycle
FRD5	fumarate reductase	fum[c] + mql6[c] <=> mqn6[c] + succ[c]	Rv1552 Rv1553 Rv1554 Rv1555	Citric Acid Cycle
FRDO2r	ferredoxin oxidoreductase	adfdRD[c] + 2 nadp[c] <=> adfdOX[c] + 2 nadph[c]	Rv0886 Rv3106	Redox Metabolism
FRDO3r	ferredoxin oxidoreductase	adfdRD[c] + 2 nad[c] <=> adfdOX[c] + 2 nadh[c]	Rv0886 Rv3106	Redox Metabolism
FRDOr	ferredoxin oxidoreductase	fdxrd[c] + nadp[c] <=> fdxox[c] + h[c] + nadph[c]	Rv2454c Rv2455c Rv0763c Rv0085	Redox Metabolism
FRRPPDIMAS	fucose rhamnose rhamnose phenol phthiocerol dimycocerosate synthesis	gdpfuc[c] + rrppdima[c] -> frrppdima[c] + gdp[c] + h[c]	Rv2957	Phenolic glycolipid biosynthesis
FTHFCL	5 formethyltetrahydrofolate cyclo ligase	5fthf[c] + atp[c] -> adp[c] + methf[c] + pi[c]	Rv0992c	Cofactor Metabolism
FTHFD	formyltetrahydrofolate deformylase	10fthf[c] + h2o[c] -> for[c] + h[c] + thf[c]	Rv2964	Folate Metabolism
FTHFL	formate tetrahydrofolate ligase	atp[c] + for[c] + thf[c] <=> 10fthf[c] + adp[c] + pi[c]		Cofactor Metabolism
FUM	fumarase	fum[c] + h2o[c] <=> mal-L[c]	Rv1098c	Citric Acid Cycle
FUMt2r	fumarate reversible transport via symport	fum[e] + h[e] <=> fum[c] + h[c]	Rv2443	Transport
G16MTM1	Glycolipid 1 6 alpha D mannosyltransferase	gdpmann[c] + ptd1ino160190[c] -> PIM1[c] + gdp[c] + h[c]	Rv2610c	PIM Biosynthesis
G16MTM10	Glycolipid 16 alpha D mannosyltransferase	PIM5[c] + gdpmann[c] -> PIM6[c] + gdp[c] + h[c]	Rv1500	PIM Biosynthesis
G16MTM2	Glycolipid 16 alpha D mannosyltransferase	Ac1PIM1[c] + gdpmann[c] -> Ac1PIM2[c] + gdp[c] + h[c]	Rv0557	PIM Biosynthesis
G16MTM4	Glycolipid 16 alpha D mannosyltransferase	Ac1PIM2[c] + decdman1p-tb[c] -> Ac1PIM3[c] + decd-tb[c] + h[c]		PIM Biosynthesis
G16MTM5	Glycolipid 16 alpha D mannosyltransferase	Ac1PIM3[c] + decdman1p-tb[c] -> Ac1PIM4[c] + decd-tb[c] + h[c]		PIM Biosynthesis
G16MTM6	Glycolipid 16 alpha D mannosyltransferase	PIM1[c] + gdpmann[c] -> PIM2[c] + gdp[c] + h[c]	Rv2188c	PIM Biosynthesis
G16MTM7	Glycolipid 16 alpha D mannosyltransferase	PIM2[c] + gdpmann[c] -> PIM3[c] + gdp[c] + h[c]		PIM Biosynthesis
G16MTM8	Glycolipid 16 alpha D mannosyltransferase	PIM3[c] + gdpmann[c] -> PIM4[c] + gdp[c] + h[c]		PIM Biosynthesis
G16MTM9	Glycolipid 16 alpha D mannosyltransferase	PIM4[c] + gdpmann[c] -> PIM5[c] + gdp[c] + h[c]	Rv1159	PIM Biosynthesis
G1PACT	glucosamine 1 phosphate N acetyltransferase	accoa[c] + gam1p[c] -> acgam1p[c] + coa[c] + h[c]	Rv1018c	Sugar Metabolism
G1PTT	glucose 1 phosphate thymidylyltransferase	dttp[c] + g1p[c] + h[c] -> dtdpglu[c] + ppi[c]	Rv0334	Arabinogalactan Synthesis
G1SATi	glutamate 1 semialdehyde aminotransferase	glu1sa[c] -> 5aop[c]	Rv0524	Porphyrin Metabolism
G3PAT160	glycerol 3 phosphate acyltransferase C160	glyc3p[c] + palmACP[c] -> 1hdecg3p[c] + ACP[c]	Rv1551	Fatty Acid Metabolism
G3PAT190	glycerol 3 phosphate acyltransferase C190	glyc3p[c] + mstrACP[c] -> 1msg3p[c] + ACP[c]	Rv1551	Fatty Acid Metabolism
G3PD1	glycerol 3 phosphate dehydrogenase NAD	glyc3p[c] + nad[c] <=> dhap[c] + h[c] + nadh[c]	Rv0564c Rv2249c Rv2982c Rv3302c	Cofactor Metabolism
G5SADs	L glutamate 5 semialdehyde dehydratase spontaneous	glu5sa[c] -> 1pyr5c[c] + h2o[c] + h[c]		Arginine and Proline Metabolism
G5SD	glutamate 5 semialdehyde dehydrogenase	glu5p[c] + h[c] + nadph[c] -> glu5sa[c] + nadp[c] + pi[c]	Rv2427c	Urea Cycle
G5SD2	glutamate 5 semialdehyde dehydrogenase	glu5p[c] + h[c] + nadh[c] -> glu5sa[c] + nad[c] + pi[c]	Rv2427c	Urea Cycle
G6PDH2	glucose 6 phosphate dehydrogenase	g6p[c] + nadp[c] -> 6pgl[c] + 3 h[c] + nadph[c]	Rv1121 Rv1447c	Pentose Phosphate Pathway
GALFT	galactofuranose transferse M tb	h2o[c] + ragund[c] + 30 udpgalfur[c] -> galfragund[c] + 30 h[c] + 30 udp[c]	Rv3808c	Arabinogalactan Synthesis
GALKr	galactokinase	atp[c] + gal[c] <=> adp[c] + gal1p[c] + h[c]	Rv0620	Sugar Metabolism
GALT	galactose 1 phosphate uridylyltransferase	gal1p[c] + h[c] + utp[c] <=> ppi[c] + udpgal[c]	Rv0618 Rv0619	Nucleotide Sugar Metabolism
GALUi	UTP glucose 1 phosphate uridylyltransferase irreversible	g1p[c] + h[c] + utp[c] -> ppi[c] + udpg[c]	Rv0993	Sugar Metabolism
GALt2	D galactose transport in via proton symport	gal[e] + h[e] -> gal[c] + h[c]	Rv3331	Transport
GAPD	glyceraldehyde 3 phosphate dehydrogenase	g3p[c] + nad[c] + pi[c] <=> 13dpg[c] + h[c] + nadh[c]	Rv1436	Glycolysis
GARFT	phosphoribosylglycinamide formyltransferase	10fthf[c] + gar[c] <=> fgam[c] + h[c] + thf[c]	Rv0389 Rv0956	Purine Metabolism
GCC2	glycine cleavage system lipoamide irreversible	alpam[c] + thf[c] -> dhlam[c] + mlthf[c] + nh4[c]	Rv2211c	Glycine Serine and Threonine Metabolism
GCCa	glycine cleavage complex	gly[c] + h[c] + lpro[c] -> alpro[c] + co2[c]	Rv1832	Glycine Serine and Threonine Metabolism
GCCb	glycine cleavage complex	alpro[c] + thf[c] -> dhlpro[c] + mlthf[c] + nh4[c]	Rv2211c	Glycine Serine and Threonine Metabolism
GCCc	glycine cleavage complex	dhlpro[c] + nad[c] -> h[c] + lpro[c] + nadh[c]	Rv0794c Rv3303c	Methionine Metabolism
GF6PTAr	Glutamine fructose 6 phosphate transaminase	f6p[c] + gln-L[c] <=> gam6p[c] + glu-L[c]	Rv3436c	Glutamate Metabolism
GFUCS	GDP L fucose synthase	gdpddman[c] + h[c] + nadph[c] -> gdpfuc[c] + nadp[c]	Rv1512 Rv1508A	Sugar Metabolism
GGLUCT2	gamma glutamylcyclotransferase	gluala[c] -> 5oxpro[c] + ala-L[c]		Membrane Metabolism
GHMT2	glycine hydroxymethyltransferase	ser-L[c] + thf[c] -> gly[c] + h2o[c] + mlthf[c]	Rv0070c Rv1093	Glycine Serine and Threonine Metabolism
GK1	guanylate kinase GMPATP	atp[c] + gmp[c] <=> adp[c] + gdp[c]	Rv1389	Purine Metabolism
GLCP	glycogen phosphorylase	glycogen[c] + pi[c] -> g1p[c]	Rv1328	Sugar Metabolism
GLCS1	glycogen synthase ADPGlc	adpglc[c] -> adp[c] + glycogen[c] + h[c]	Rv1326c	Sugar Metabolism
GLCabc	D glucose transport via ABC system	atp[c] + glc-D[e] + h2o[c] -> adp[c] + glc-D[c] + h[c] + pi[c]	Rv1236 Rv1237 Rv1238	Transport
GLGC	glucose 1 phosphate adenylyltransferase	atp[c] + g1p[c] + h[c] -> adpglc[c] + ppi[c]	Rv1213	Sugar Metabolism
GLNS	glutamine synthetase	atp[c] + glu-L[c] + nh4[c] -> adp[c] + gln-L[c] + h[c] + pi[c]	Rv1878 Rv2220 Rv2222c Rv2860c	Glutamate Metabolism
GLNSP1	glutamine synthetase uaaAgld	atp[c] + nh4[c] + uaaAgla[c] -> adp[c] + h[c] + pi[c] + uaaAgtla[c]	Rv1878 Rv2220 Rv2222c Rv2860c	Peptidoglycan Metabolism
GLNSP2	glutamine synthetase uaaGgla	atp[c] + nh4[c] + uaaGgla[c] -> adp[c] + h[c] + pi[c] + uaaGgtla[c]	Rv1878 Rv2220 Rv2222c Rv2860c	Peptidoglycan Metabolism
GLNSP3	glutamine synthetase uaagmda	atp[c] + nh4[c] + uaagmda[c] -> adp[c] + h[c] + pi[c] + uaagtmda[c]	Rv1878 Rv2220 Rv2222c Rv2860c	Peptidoglycan Metabolism
GLU5K	glutamate 5 kinase	atp[c] + glu-L[c] -> adp[c] + glu5p[c]	Rv2439c	Urea Cycle
GLUCYS	gamma glutamylcysteine synthetase	atp[c] + cys-L[c] + glu-L[c] -> adp[c] + glucys[c] + h[c] + pi[c]	Rv3704c	Glutamate Metabolism
GLUDC	Glutamate Decarboxylase	glu-L[c] + h[c] -> 4abut[c] + co2[c]	Rv3432c	Glutamate Metabolism
GLUDx	glutamate dehydrogenase NAD	glu-L[c] + h2o[c] + nad[c] <=> akg[c] + h[c] + nadh[c] + nh4[c]	Rv2476c	Glutamate Metabolism
GLUPRT	glutamine phosphoribosyldiphosphate amidotransferase	gln-L[c] + h2o[c] + prpp[c] -> glu-L[c] + ppi[c] + pram[c]	Rv0808 Rv1602	Purine Metabolism
GLUR	glutamate racemase	glu-D[c] <=> glu-L[c]	Rv1338	Glutamate Metabolism
GLUSy	glutamate synthase NADPH	akg[c] + gln-L[c] + h[c] + nadph[c] -> 2 glu-L[c] + nadp[c]	Rv3858c Rv3859c	Glutamate Metabolism
GLUTRR	glutamyl tRNA reductase	glutrna[c] + h[c] + nadph[c] -> glu1sa[c] + nadp[c] + trnaglu[c]	Rv0509	Cofactor Metabolism
GLUt2r	L glutamate transport via proton symport reversible	glu-L[e] + h[e] <=> glu-L[c] + h[c]		Transport
GLXO1	glyoxylate oxidase	glx[c] + h2o[c] + nad[c] -> 2 h[c] + nadh[c] + oxa[c]		Glyoxylate Metabolism
GLYBabc	Glycine betaine transport via ABC system	atp[c] + glyb[e] + h2o[c] -> adp[c] + glyb[c] + h[c] + pi[c]	Rv3756c Rv3757c Rv3758c Rv3759c	Transport
GLYC3Pabc	sn Glycerol 3 phosphate transport via ABC system	atp[c] + glyc3p[e] + h2o[c] -> adp[c] + glyc3p[c] + h[c] + pi[c]	Rv2832c Rv2833c Rv2834c Rv2835c	Transport
GLYCK	glycerate kinase	atp[c] + glyc-R[c] -> 3pg[c] + adp[c] + h[c]	Rv2205c	Glycine Serine and Threonine Metabolism
GLYCL	Glycine Cleavage System	gly[c] + nad[c] + thf[c] -> co2[c] + mlthf[c] + nadh[c] + nh4[c]	Rv1826 Rv0811c	Folate Metabolism
GLYCTO1	Glycolate oxidase	glyclt[c] + o2[c] -> glx[c] + h2o2[c]	Rv1257c	Glyoxylate Metabolism
GLYCTO2	Glycolate oxidase	glyclt[c] + q8[c] -> glx[c] + q8h2[c]	Rv1257c	Glyoxylate Metabolism
GLYCTO3	Glycolate oxidase	glyclt[c] + mqn8[c] -> glx[c] + mql8[c]	Rv1257c	Glyoxylate Metabolism
GLYCTO4	Glycolate oxidase	2dmmq8[c] + glyclt[c] -> 2dmmql8[c] + glx[c]	Rv1257c	Glyoxylate Metabolism
GLYCt	glycerol transport via channel	glyc[c] <=> glyc[e]		Transport
GLYK	glycerol kinase	atp[c] + glyc[c] -> adp[c] + glyc3p[c] + h[c]	Rv3696c	Sugar Metabolism
GLYt2r	glycine reversible transport via proton symport	gly[e] + h[e] <=> gly[c] + h[c]	Rv1704c	Transport
GMAND	GDP D mannose dehydratase	gdpmann[c] -> gdpddman[c] + h2o[c]	Rv0112 Rv1511	Sugar Metabolism
GMPS2	GMP synthase	atp[c] + gln-L[c] + h2o[c] + xmp[c] -> amp[c] + glu-L[c] + gmp[c] + 2 h[c] + ppi[c]	Rv3396c	Purine Metabolism
GMT1	gdp mannosyl phosphate transferase	decd-tb[c] + gdpmann[c] -> decdman1p-tb[c] + gdp[c]	Rv2051c	Membrane Metabolism
GMT2	gdp mannosyl phosphate transferase	3 gdpmann[c] + harab-D[c] -> 3 gdp[c] + 3 h[c] + mharab-D[c]	Rv2051c	Membrane Metabolism
GND	phosphogluconate dehydrogenase	6pgc[c] + nadp[c] -> co2[c] + nadph[c] + ru5p-D[c]	Rv1122 Rv1844c	Pentose Phosphate Pathway
GPDDA2	Glycerophosphodiester phosphodiesterase Glycerophosphoethanolamine	g3pe[c] + h2o[c] -> etha[c] + glyc3p[c] + h[c]	Rv0317c Rv2277c Rv3842c	Fatty Acid Metabolism
GRTT	geranyltranstransferase	grdp[c] + ipdp[c] -> frdp[c] + ppi[c]	Rv1086 Rv3398c	Polyprenyl Metabolism
GSNK	guanosine kinase	atp[c] + gsn[c] -> adp[c] + gmp[c] + h[c]		Nucleotide Sugar Metabolism
GTHOr	glutathione oxidoreductase	gthox[c] + h[c] + nadph[c] <=> 2 gthrd[c] + nadp[c]	Rv2855	Glutamate Metabolism
GTHRDt2	glutathione transport	gthrd[e] + atp[c] + h2o[c] -> gthrd[c] + adp[c] + pi[c]	Rv1280c Rv1281c Rv1282c Rv1283c	Transport
GTHS	glutathione synthetase	atp[c] + glucys[c] + gly[c] -> adp[c] + gthrd[c] + h[c] + pi[c]		Redox Metabolism
GTMLT	g glutamyltransferase	ala-L[c] + gthrd[c] -> cgly[c] + gluala[c]	Rv0773c Rv2394	Other Amino Acid Metabolism
GTPCI	GTP cyclohydrolase I	gtp[c] + h2o[c] -> ahdt[c] + for[c] + h[c]	Rv3609c	Folate Metabolism
GTPCII	GTP cyclohydrolase II	gtp[c] + 3 h2o[c] -> 25dhpp[c] + for[c] + 2 h[c] + ppi[c]	Rv1415 Rv1940	Riboflavin Metabolism
GTPCII2	GTP cyclohydrolase II 25drapp	gtp[c] + 3 h2o[c] -> 25drapp[c] + for[c] + 2 h[c] + ppi[c]		Cofactor Metabolism
GTPDPK	GTP diphosphokinase	atp[c] + gtp[c] -> amp[c] + gdptp[c] + h[c]	Rv2583c	Purine Metabolism
GTPH1	GTP diphosphohydrolase	gtp[c] + 2 h2o[c] -> gmp[c] + 2 h[c] + 2 pi[c]	Rv2583c	Purine Metabolism
GUACYC	guanylate cyclase	gtp[c] -> 35cgmp[c] + ppi[c]	Rv2435c Rv0386	Purine Metabolism
GUAD	guanine deaminase	gua[c] + h2o[c] + h[c] -> nh4[c] + xan[c]		Nucleotide Sugar Metabolism
GUAPRT	guanine phosphoribosyltransferase	gua[c] + prpp[c] -> gmp[c] + ppi[c]		Nucleotide Sugar Metabolism
H2CO3D	carboxylic acid dissociation	co2[c] + h2o[c] <=> h2co3[c]	Rv3273 Rv3588c Rv1284	Miscellaneous
H2CO3TP	H2CO3 transport	h2co3[e] <=> h2co3[c]		Transport
H2Ot	H2O transport via diffusion	h2o[e] <=> h2o[c]		Transport
H2St1	h2s transport	h2s[c] -> h2s[e]		Transport
H2td	hydrogen transport	h2[c] <=> h2[e]		Transport
HAS	hexa arabinofuranoside synthesis	arab-D[c] + 5 decda-tb[c] -> 5 decd-tb[c] + harab-D[c]		Fatty Acid Metabolism
HCO3E	HCO3 equilibration reaction	co2[c] + h2o[c] <=> h[c] + hco3[c]	Rv3273 Rv3588c	Miscellaneous
HCYSMT	homocysteine S methyltransferase	amet[c] + hcys-L[c] -> ahcys[c] + h[c] + met-L[c]	Rv0511 Rv2458	Methionine Metabolism
HDCAt2	Hexadecanoate transport via proton symport	h[e] + hdca[e] -> h[c] + hdca[c]		Transport
HEX1	hexokinase D glucoseATP	atp[c] + glc-D[c] -> adp[c] + g6p[c] + h[c]	Rv0650	Glycolysis
HISTD	histidinol dehydrogenase	h2o[c] + histd[c] + 2 nad[c] -> 3 h[c] + his-L[c] + 2 nadh[c]	Rv1599	Histidine Metabolism
HISTP	histidinol phosphatase	h2o[c] + hisp[c] -> histd[c] + pi[c]		Histidine Metabolism
HISt2r	L histidine reversible transport via proton symport	h[e] + his-L[e] <=> h[c] + his-L[c]		Transport
HMBS	hydroxymethylbilane synthase	h2o[c] + 4 ppbng[c] -> hmbil[c] + 4 nh4[c]	Rv0510	Porphyrin Metabolism
HMPK1	hydroxymethylpyrimidine kinase ATP	4ahmmp[c] + atp[c] -> 4ampm[c] + adp[c] + h[c]	Rv0422c	Cofactor Metabolism
HMPK2	hydroxymethylpyrimidine kinase CTP	4ahmmp[c] + ctp[c] -> 4ampm[c] + cdp[c] + h[c]	Rv0422c	Cofactor Metabolism
HMPK3	hydroxymethylpyrimidine kinase UTP	4ahmmp[c] + utp[c] -> 4ampm[c] + h[c] + udp[c]	Rv0422c	Cofactor Metabolism
HMPK4	hydroxymethylpyrimidine kinase GTP	4ahmmp[c] + gtp[c] -> 4ampm[c] + gdp[c] + h[c]	Rv0422c	Cofactor Metabolism
HOPNTAL	4 hydroxy 2 oxopentanoate aldolase	4h2opntn[c] -> acald[c] + pyr[c]	Rv3469c Rv3534c	Pyruvate Metabolism
HPPK	2 amino 4 hydroxy 6 hydroxymethyldihydropteridine diphosphokinase	2ahhmp[c] + atp[c] -> 2ahhmd[c] + amp[c] + h[c]	Rv3606c	Folate Metabolism
HPPK2	6 hydroxymethyl dihydropterin pyrophosphokinase	6hmhpt[c] + atp[c] -> 6hmhptpp[c] + amp[c] + h[c]		Folate Metabolism
HSDx	homoserine dehydrogenase NADH	hom-L[c] + nad[c] <=> aspsa[c] + h[c] + nadh[c]	Rv1294	Glycine Serine and Threonine Metabolism
HSDy	homoserine dehydrogenase NADPH	hom-L[c] + nadp[c] <=> aspsa[c] + h[c] + nadph[c]	Rv1294	Glycine Serine and Threonine Metabolism
HSERTA	homoserine O trans acetylase	accoa[c] + hom-L[c] <=> achms[c] + coa[c]	Rv3341	Methionine Metabolism
HSK	homoserine kinase	atp[c] + hom-L[c] -> adp[c] + h[c] + phom[c]	Rv1296	Glycine Serine and Threonine Metabolism
HSST	homoserine O succinyltransferase	hom-L[c] + succoa[c] -> coa[c] + suchms[c]		Other Amino Acid Metabolism
HSTPT	histidinol phosphate transaminase	glu-L[c] + imacp[c] -> akg[c] + hisp[c]	Rv1600 Rv2231c Rv3772	Histidine Metabolism
HXPRT	hypoxanthine phosphoribosyltransferase Hypoxanthine	hxan[c] + prpp[c] -> imp[c] + ppi[c]	Rv3624c	Purine Metabolism
IACGAMS	1D myo inositol 2 Acetamido 2 deoxy D glucopyranoside synthesis	acgam[c] + mi1p-D[c] -> iacgam[c] + pi[c]	Rv0486	Redox Metabolism
ICDHy	isocitrate dehydrogenase NADP	icit[c] + nadp[c] -> akg[c] + co2[c] + nadph[c]	Rv0066c Rv3339c	Citric Acid Cycle
ICHORSi	Isochorismate Synthase	chor[c] -> ichor[c]	Rv3215	Ubiquinone Metabolism
ICL	Isocitrate lyase	icit[c] -> glx[c] + succ[c]	Rv0467 Rv1915 Rv1916	Glyoxylate Metabolism
ID3ACALDt	Indoleacetaldehyde transport extracellular	id3acald[c] <=> id3acald[e]		Transport
IG3PS	Imidazole glycerol 3 phosphate synthase	gln-L[c] + prlp[c] -> aicar[c] + eig3p[c] + glu-L[c] + h[c]	Rv1605	Histidine Metabolism
IGAMD	1D myo inositol 2 Acetamido 2 deoxy D glucopyranoside deacetylase	h2o[c] + iacgam[c] -> ac[c] + igam[c]	Rv1170	Redox Metabolism
IGPDH	imidazoleglycerol phosphate dehydratase	eig3p[c] -> h2o[c] + imacp[c]	Rv1601	Histidine Metabolism
IGPS	indole 3 glycerol phosphate synthase	2cpr5p[c] + h[c] -> 3ig3p[c] + co2[c] + h2o[c]	Rv1611	Phenylalanine Tyrosine Tryptophan Metabolism
ILETA	isoleucine transaminase	akg[c] + ile-L[c] <=> 3mop[c] + glu-L[c]	Rv2210c	Valine Leucine and Isoleucine Metabolism
ILEt2r	L isoleucine reversible transport via proton symport	h[e] + ile-L[e] <=> h[c] + ile-L[c]		Transport
IMPC	IMP cyclohydrolase	h2o[c] + imp[c] <=> fprica[c]	Rv0957	Purine Metabolism
IMPD	IMP dehydrogenase	h2o[c] + imp[c] + nad[c] -> h[c] + nadh[c] + xmp[c]	Rv1843c Rv3410c Rv3411c	Purine Metabolism
INDPYRD	Indole 3 pyruvate decarboxylase	h[c] + indpyr[c] <=> co2[c] + id3acald[c]	Rv0853c	Pyruvate Metabolism
INSH	Inosine hydrolase	h2o[c] + ins[c] -> hxan[c] + rib-D[c]	Rv3393	Purine Metabolism
INSK	insosine kinase	atp[c] + ins[c] -> adp[c] + h[c] + imp[c]		Nucleotide Sugar Metabolism
IPDDI	isopentenyl diphosphate D isomerase	ipdp[c] <=> dmpp[c]	Rv1745c	Polyprenyl Metabolism
IPDPS	1 hydroxy 2 methyl 2 E butenyl 4 diphosphate reductase ipdp	h2mb4p[c] + h[c] + nadh[c] -> h2o[c] + ipdp[c] + nad[c]		Polyprenyl Metabolism
IPMD	3 isopropylmalate dehydrogenase	3c2hmp[c] + nad[c] -> 3c4mop[c] + h[c] + nadh[c]	Rv2995c	Valine Leucine and Isoleucine Metabolism
IPPMIa	3 isopropylmalate dehydratase	3c2hmp[c] <=> 2ippm[c] + h2o[c]	Rv2987c Rv2988c	Valine Leucine and Isoleucine Metabolism
IPPMIb	2 isopropylmalate hydratase	2ippm[c] + h2o[c] <=> 3c3hmp[c]	Rv2987c Rv2988c	Valine Leucine and Isoleucine Metabolism
IPPS	2 isopropylmalate synthase	3mob[c] + accoa[c] + h2o[c] -> 3c3hmp[c] + coa[c] + h[c]	Rv3710	Valine Leucine and Isoleucine Metabolism
KARA1i	acetohydroxy acid isomeroreductase	alac-S[c] + h[c] + nadph[c] -> 23dhmb[c] + nadp[c]	Rv3001c	Valine Leucine and Isoleucine Metabolism
KARA2i	ketol acid reductoisomerase 2 Aceto 2 hydroxybutanoate	2ahbut[c] + h[c] + nadph[c] -> 23dhmp[c] + nadp[c]	Rv3001c	Valine Leucine and Isoleucine Metabolism
Kabc	Potassium ABC transporter	atp[c] + h2o[c] + k[e] -> adp[c] + h[c] + k[c] + pi[c]	Rv1029 Rv1030 Rv1031	Transport
Kt3r	potassium proton antiporter	h[e] + k[c] <=> h[c] + k[e]	Rv2691 Rv2692	Transport
LACZ	b galactosidase	h2o[c] + lcts[c] -> gal[c] + glc-D[c]		Sugar Metabolism
LCTSabc	lactose transport via ABC system import	atp[c] + h2o[c] + lcts[e] -> adp[c] + h[c] + lcts[c] + pi[c]	Rv2316 Rv2317 Rv2318	Transport
LDH_L	L lactate dehydrogenase	lac-L[c] + nad[c] <=> h[c] + nadh[c] + pyr[c]	Rv0694	Glycolysis
LEUTA	leucine transaminase	akg[c] + leu-L[c] <=> 4mop[c] + glu-L[c]	Rv2210c	Valine Leucine and Isoleucine Metabolism
LEUt2r	L leucine reversible transport via proton symport	h[e] + leu-L[e] <=> h[c] + leu-L[c]		Transport
LO	L lactate oxidase	lac-L[c] + o2[c] -> ac[c] + co2[c] + h2o[c]		Pyruvate Metabolism
LPLIPAL2E160	Lysophospholipase L2 2 acylglycerophosphoethanolamine n C160	2agpe160[c] + h2o[c] -> g3pe[c] + h[c] + hdca[c]	Rv0183	Fatty Acid Metabolism
LPLIPAL2E180	Lysophospholipase L2 2 acylglycerophosphoethanolamine n C180	2agpe180[c] + h2o[c] -> g3pe[c] + h[c] + ocdca[c]	Rv0183 Rv0215c Rv0752c Rv0873 Rv2789c Rv3274c Rv3563 Rv3564	Fatty Acid Metabolism
LYSt5r	L lysine transport via diffusion	lys-L[e] <=> lys-L[c]	Rv2320c	Transport
L_LACD	L Lactate dehydrogenase irreversible	2 ficytc[c] + lac-L[c] -> 2 focytc[c] + pyr[c]	Rv0694	Pyruvate Metabolism
L_LACD2	L Lactate dehydrogenase ubiquinone	lac-L[c] + q8[c] -> pyr[c] + q8h2[c]	Rv1872c	Pyruvate Metabolism
L_LACD3	L Lactate dehydrogenase menaquinone	lac-L[c] + mqn8[c] -> mql8[c] + pyr[c]	Rv1872c	Pyruvate Metabolism
L_LACt2r	L lactate reversible transport via proton symport	h[e] + lac-L[e] <=> h[c] + lac-L[c]	Rv1902c	Transport
L_LACt3	L lactate transport out via proton antiport	h[e] + lac-L[c] -> h[c] + lac-L[e]	Rv0191	Transport
MALS	malate synthase	accoa[c] + glx[c] + h2o[c] -> coa[c] + h[c] + mal-L[c]	Rv1837c	Pyruvate Metabolism
MALT	alpha glucosidase	h2o[c] + malt[c] -> 2 glc-D[c]	Rv2471	Sugar Metabolism
MALTHPabc	maltoheptaose transport via ABC system	atp[c] + h2o[c] + malthp[e] -> adp[c] + h[c] + malthp[c] + pi[c]	Rv1236 Rv1237 Rv1238	Transport
MALTabc	maltose transport via ABC system	atp[c] + h2o[c] + malt[e] -> adp[c] + h[c] + malt[c] + pi[c]	Rv1236 Rv1237 Rv1238	Transport
MALt2r	L malate reversible transport via proton symport	h[e] + mal-L[e] <=> h[c] + mal-L[c]	Rv2443	Transport
MAN1PT	mannose 1 phosphate guanylyltransferase	gtp[c] + h[c] + man1p[c] -> gdpmann[c] + ppi[c]	Rv3264c	Sugar Metabolism
MAN1PT2	mannose 1 phosphate guanylyltransferase GDP	gdp[c] + h[c] + man1p[c] -> gdpmann[c] + pi[c]	Rv3264c	Sugar Metabolism
MAN6PI	mannose 6 phosphate isomerase	man6p[c] <=> f6p[c]	Rv3255c Rv3256c	Sugar Metabolism
MANAT1	mannosyl acyl transferase	PIM1[c] + pmtcoa[c] -> Ac1PIM1[c] + coa[c]	Rv2611c	PIM Biosynthesis
MANAT2	mannosyl acyl transferase	PIM2[c] + pmtcoa[c] -> Ac1PIM2[c] + coa[c]	Rv2611c	PIM Biosynthesis
MANAT3	mannosyl acyl transferase	Ac1PIM2[c] + pmtcoa[c] -> Ac2PIM2[c] + coa[c]		PIM Biosynthesis
MCBTS	mycobactin synthesis	atp[c] + bhb[c] + h[c] + 2 lys-L[c] + 2 o2[c] + odecoa[c] + salc[c] + thr-L[c] -> adp[c] + co2[c] + coa[c] + 5 h2o[c] + mcbts[c] + pi[c]	Rv2378c Rv2379c Rv2380c Rv2381c Rv2382c Rv2383c Rv2384	Membrane Metabolism
MCBTS2	mycobactin synthesis	atp[c] + bhb[c] + h[c] + 2 lys-L[c] + 2 o2[c] + odecoa[c] + salc[c] + ser-L[c] -> adp[c] + co2[c] + coa[c] + 5 h2o[c] + mcbtt[c] + pi[c]	Rv2378c Rv2379c Rv2380c Rv2381c Rv2382c Rv2383c Rv2384	Membrane Metabolism
MCBTS3	carboxymycobactin synthesis	atp[c] + bhb[c] + 2 lys-L[c] + 2 nadp[c] + 3.5 o2[c] + occoa[c] + salc[c] + ser-L[c] -> adp[c] + cmcbtt[c] + co2[c] + coa[c] + 5 h2o[c] + 2 h[c] + 2 nadph[c] + pi[c]	Rv2378c Rv2379c Rv2380c Rv2381c Rv2382c Rv2383c Rv2384	Membrane Metabolism
MCD	Malonyl CoA Decarboxylase cytoplasmic	h[c] + malcoa[c] -> accoa[c] + co2[c]	Rv1347c	Fatty Acid Metabolism
MCOATA	Malonyl CoA ACP transacylase	ACP[c] + malcoa[c] <=> coa[c] + malACP[c]	Rv0649 Rv2243 Rv2244	Fatty Acid Metabolism
MDFDH	mycothiol dependent formaldehyde dehydrogenase	mshfald[c] + nad[c] <=> h[c] + mshfaldox[c] + nadh[c]	Rv1895	Redox Metabolism
MDH	malate dehydrogenase	mal-L[c] + nad[c] <=> h[c] + nadh[c] + oaa[c]	Rv1240	Citric Acid Cycle
ME1	malic enzyme NAD	mal-L[c] + nad[c] -> co2[c] + nadh[c] + pyr[c]	Rv2332	Pyruvate Metabolism
MECDPDH	2C methyl D erythritol 2 4 cyclodiphosphate dehydratase	2mecdp[c] + h[c] -> h2mb4p[c] + h2o[c]		Polyprenyl Metabolism
MECDPS	2 C methyl D erythritol 2 4 cyclodiphosphate synthase	2p4c2me[c] -> 2mecdp[c] + cmp[c]	Rv3581c	Polyprenyl Metabolism
MEOHt2	Methanol diffusion	meoh[e] <=> meoh[c]		Transport
MEPCT	2 C methyl D erythritol 4 phosphate cytidylyltransferase	2me4p[c] + ctp[c] + h[c] -> 4c2me[c] + ppi[c]	Rv3582c	Polyprenyl Metabolism
METAT	methionine adenosyltransferase	atp[c] + h2o[c] + met-L[c] -> amet[c] + pi[c] + ppi[c]	Rv1392	Methionine Metabolism
METOX1s	methionine oxidation spontaneous	h2o2[c] + met-L[c] -> h2o[c] + metsox-S-L[c]		Methionine Metabolism
METOX2s	methionine oxidation 2 spontaneous	h2o2[c] + met-L[c] -> h2o[c] + metsox-R-L[c]		Methionine Metabolism
METS	methionine synthase	5mthf[c] + hcys-L[c] -> h[c] + met-L[c] + thf[c]	Rv2124c	Methionine Metabolism
METSOXR1	L methionine S oxide reductase	metsox-S-L[c] + trdrd[c] -> h2o[c] + met-L[c] + trdox[c]	Rv0137c	Other Amino Acid Metabolism
METSOXR2	L methionine R sulfoxide reductase	metsox-R-L[c] + trdrd[c] -> h2o[c] + met-L[c] + trdox[c]	Rv2674	Other Amino Acid Metabolism
METabc	L methionine transport via ABC system	atp[c] + h2o[c] + met-L[e] -> adp[c] + h[c] + met-L[c] + pi[c]		Transport
MGt5	magnesium transport inout via permease no H	mg2[c] <=> mg2[e]	Rv1239c	Transport
MHPGLUT	5 methyltetrahydropteroyltriglutamate homocysteine S methyltransferase	hcys-L[c] + mhpglu[c] -> hpglu[c] + met-L[c]	Rv1133c	Methionine Metabolism
MI1PP	myo inositol 1 phosphatase	h2o[c] + mi1p-D[c] -> inost[c] + pi[c]	Rv1604 Rv2701c Rv3137 Rv2131c	Fatty Acid Metabolism
MI1PS	myo Inositol 1 phosphate synthase	g6p[c] -> mi1p-D[c]	Rv0046c	Peptidoglycan Metabolism
MI3PP	myo inositol 3 phosphatase	h2o[c] + mi3p-D[c] -> inost[c] + pi[c]	Rv1604	Peptidoglycan Metabolism
MI4PP	myo inositol 4 phosphatase	h2o[c] + mi4p-D[c] -> inost[c] + pi[c]	Rv1604	Peptidoglycan Metabolism
MMCD	Methylmalonyl CoA decarboxylase	h[c] + mmcoa-S[c] -> co2[c] + ppcoa[c]		Fatty Acid Metabolism
MME	methylmalonyl CoA epimerase	mmcoa-R[c] <=> mmcoa-S[c]	Rv0855 Rv1322A	Fatty Acid Metabolism
MMM2r	Methylmalonyl CoA mutase	succoa[c] <=> mmcoa-R[c]	Rv1492 Rv1493	Fatty Acid Metabolism
MMSAD1	methylmalonate semialdehyde dehydrogenase	2mop[c] + coa[c] + nad[c] -> co2[c] + nadh[c] + ppcoa[c]	Rv0753c	Sugar Metabolism
MMSAD2	methylmalonate semialdehyde dehydrogenase propanol	coa[c] + nad[c] + ppal[c] -> h[c] + nadh[c] + ppcoa[c]	Rv0753c	Sugar Metabolism
MMSAD3	methylmalonate semialdehyde dehydrogenase malonic semialdehyde	coa[c] + msa[c] + nad[c] -> accoa[c] + co2[c] + nadh[c]	Rv0753c	Sugar Metabolism
MN6PP	mannose 6 phosphate phosphatase	h2o[c] + man6p[c] -> man[c] + pi[c]	Rv1692	Sugar Metabolism
MNDNS1	menadione synthase	dhna[c] + 3 h[c] + 2 nadph[c] -> 2 h2o[c] + mndn[c] + 2 nadp[c]		Ubiquinone Metabolism
MNDNS2	menadione synthase	dhna[c] + 3 h[c] + 2 nadh[c] -> 2 h2o[c] + mndn[c] + 2 nad[c]		Ubiquinone Metabolism
MOHMT	3 methyl 2 oxobutanoate hydroxymethyltransferase	3mob[c] + h2o[c] + mlthf[c] -> 2dhp[c] + thf[c]	Rv2225	Pantothenate and CoA Metabolism
MOTH	maltooligosyltrehalose trehalohydrolase	h2o[c] + motre[c] -> maltpt[c] + tre[c]	Rv1562c	Sugar Metabolism
MOTS	maltooligosyltrehalose synthase	malthp[c] -> motre[c]	Rv1563c	Sugar Metabolism
MPML	Mg protoporphyrin IX magnesium lyase	atp[c] + h2o[c] + mg2[c] + ppp9[c] <=> adp[c] + 3 h[c] + mppp9[c] + pi[c]	Rv0958	Cofactor Metabolism
MSHAMID	conjugated glutathione amidase Mtb	bmnmsh[c] + h2o[c] -> acysbmn[c] + igam[c]	Rv1082	Redox Metabolism
MSHOXH	mshfaldox hydrolysis Mtb	h2o[c] + mshfaldox[c] -> for[c] + h[c] + msh[c]		Redox Metabolism
MSHS	mycothiol synthase	accoa[c] + cigam[c] -> coa[c] + msh[c]	Rv0819	Redox Metabolism
MTAN	methylthioadenosine nucleosidase	5mta[c] + h2o[c] -> 5mtr[c] + ade[c]	Rv0091	Methionine Metabolism
MTHFC	methenyltetrahydrofolate cyclohydrolase	h2o[c] + methf[c] <=> 10fthf[c] + h[c]	Rv3356c	Folate Metabolism
MTHFD	methylenetetrahydrofolate dehydrogenase NADP	mlthf[c] + nadp[c] <=> methf[c] + nadph[c]	Rv3356c	Folate Metabolism
MTHFD2	methylenetetrahydrofolate dehydrogenase NAD	mlthf[c] + nad[c] <=> methf[c] + nadh[c]	Rv3356c	Cofactor Metabolism
MTHFR2	5 10 methylenetetrahydrofolate reductase NADH	2 h[c] + mlthf[c] + nadh[c] -> 5mthf[c] + nad[c]		Folate Metabolism
MTI	maltose trehalose isomerase	tre[c] <=> malt[c]	Rv0126	Sugar Metabolism
MYC1CYC1	Mycolic Acid Cyclopropanation	amet[c] + meroacidACP[c] -> ahcys[c] + h[c] + meroacidcyc1ACP[c]	Rv0470c	Mycolic Acid Biosynthesis
MYC1CYC2	Mycolic Acid Cyclopropanation	amet[c] + mmeroacidACP[c] -> ahcys[c] + h[c] + mmeroacidcyc1ACP[c]	Rv0470c	Mycolic Acid Biosynthesis
MYC1CYC3	Mycolic Acid Cyclopropanation	amet[c] + kmeroacidACP[c] -> ahcys[c] + h[c] + kmeroacidcyc1ACP[c]	Rv0470c	Mycolic Acid Biosynthesis
MYC1CYC4	Mycolic Acid Cyclopropanation	amet[c] + mmmeroacidACP[c] -> ahcys[c] + h[c] + mmmeroacidcyc1ACP[c]	Rv0503c Rv0644c	Mycolic Acid Biosynthesis
MYC1CYC5	Mycolic Acid Cyclopropanation	amet[c] + mkmeroacidACP[c] -> ahcys[c] + h[c] + mkmeroacidcyc1ACP[c]	Rv0503c Rv0644c	Mycolic Acid Biosynthesis
MYC1M1	Mycolic Acid Methyl Hydroxyl Addition	amet[c] + h2o[c] + mmeroacidACP[c] -> ahcys[c] + h[c] + mmmeroacidACP[c]	Rv0503c Rv0642c Rv0644c Rv0645c	Mycolic Acid Biosynthesis
MYC1M2	Mycolic Acid Methyl Hydroxyl Addition	amet[c] + h2o[c] + kmeroacidACP[c] -> ahcys[c] + h[c] + mkmeroacidACP[c]	Rv0503c Rv0642c Rv0644c Rv0645c	Mycolic Acid Biosynthesis
MYC2CYC1	Mycolic Acid Cyclopropanation	amet[c] + meroacidcyc1ACP[c] -> ahcys[c] + h[c] + meroacidcyc2ACP[c]	Rv0644c	Mycolic Acid Biosynthesis
MYC2CYC2	Mycolic Acid Cyclopropanation	amet[c] + mmeroacidcyc1ACP[c] -> ahcys[c] + h[c] + mmeroacidcyc2ACP[c]	Rv0644c	Mycolic Acid Biosynthesis
MYC2CYC3	Mycolic Acid Cyclopropanation	amet[c] + kmeroacidcyc1ACP[c] -> ahcys[c] + h[c] + kmeroacidcyc2ACP[c]	Rv0644c	Mycolic Acid Biosynthesis
MYCFLUX1	mycolic acid conglomeration flux	mycolate[c] -> rmyc[c]		Mycolic Acid Biosynthesis
MYCFLUX2	mycolic acid conglomeration flux	mmycolate[c] -> rmyc[c]		Mycolic Acid Biosynthesis
MYCFLUX3	mycolic acid conglomeration flux	kmycolate[c] -> rmyc[c]		Mycolic Acid Biosynthesis
MYCFLUX4	mycolic acid conglomeration flux	mmmycolate[c] -> rmyc[c]		Mycolic Acid Biosynthesis
MYCFLUX5	mycolic acid conglomeration flux	mkmycolate[c] -> rmyc[c]		Mycolic Acid Biosynthesis
MYCON1	Mycolic Acid Condensation	chexccoa[c] + 2 h2o[c] + meroacidcyc2AMP[c] -> amp[c] + co2[c] + coa[c] + 2 h[c] + mycolate[c]	Rv3800c	Mycolic Acid Biosynthesis
MYCON2	Mycolic Acid Condensation	chexccoa[c] + 2 h2o[c] + mmeroacidcyc2AMP[c] -> amp[c] + co2[c] + coa[c] + 2 h[c] + mmycolate[c]	Rv3800c	Mycolic Acid Biosynthesis
MYCON3	Mycolic Acid Condensation	chexccoa[c] + 2 h2o[c] + kmeroacidcyc2AMP[c] -> amp[c] + co2[c] + coa[c] + 2 h[c] + kmycolate[c]	Rv3800c	Mycolic Acid Biosynthesis
MYCON4	Mycolic Acid Condensation	chexccoa[c] + 2 h2o[c] + mmmeroacidcyc1AMP[c] -> amp[c] + co2[c] + coa[c] + 2 h[c] + mmmycolate[c]	Rv3800c	Mycolic Acid Biosynthesis
MYCON5	Mycolic Acid Condensation	chexccoa[c] + 2 h2o[c] + mkmeroacidcyc1AMP[c] -> amp[c] + co2[c] + coa[c] + 2 h[c] + mkmycolate[c]	Rv3800c	Mycolic Acid Biosynthesis
MYCSacp50	mycolic acid synthase C50	33 h[c] + hexc[c] + 12 malACP[c] + 24 nadph[c] -> 11 ACP[c] + 12 co2[c] + 13 h2o[c] + meroacidACP[c] + 24 nadp[c]	Rv0098 Rv1483 Rv2245 Rv2246	Mycolic Acid Biosynthesis
MYCSacp56	mycolic acid synthase C56	42 h[c] + hexc[c] + 15 malACP[c] + 30 nadph[c] -> 14 ACP[c] + 15 co2[c] + 16 h2o[c] + mmeroacidACP[c] + 30 nadp[c]	Rv0098 Rv1483 Rv2245 Rv2246	Mycolic Acid Biosynthesis
MYCSacp58	mycolic acid synthase C58	47 h[c] + hexc[c] + 16 malACP[c] + 30 nadph[c] -> 15 ACP[c] + 16 co2[c] + 17 h2o[c] + kmeroacidACP[c] + 30 nadp[c]	Rv0098 Rv1483 Rv2245 Rv2246	Mycolic Acid Biosynthesis
MYCTR	mycothiol reductase nadp dependent	2 msh[c] + nadp[c] <=> h[c] + mssg[c] + nadph[c]	Rv2855	Redox Metabolism
MYCTR2	mycothiol reductase glutathione exchange	gthox[c] + 2 msh[c] <=> 2 gthrd[c] + mssg[c]	Rv2855	Redox Metabolism
NADH10	NADH dehydrogenase menaquinone 8 0 protons	h[c] + mqn8[c] + nadh[c] -> mql8[c] + nad[c]	Rv0082 Rv3145 Rv3146 Rv3147 Rv3148 Rv3149 Rv3150 Rv3151 Rv3152 Rv3153 Rv3154 Rv3155 Rv3156 Rv3157 Rv3158	Ubiquinone Metabolism
NADH2r	NADH dehydrogenase	h[c] + nadh[c] + q[c] <=> nad[c] + qh2[c]	Rv0082 Rv3145 Rv3146 Rv3147 Rv3148 Rv3149 Rv3150 Rv3151 Rv3152 Rv3153 Rv3154 Rv3155 Rv3156 Rv3157 Rv3158	Redox Metabolism
NADH5	NADH dehydrogenase ubiquinone 8	h[c] + nadh[c] + q8[c] -> nad[c] + q8h2[c]	Rv0082 Rv3145 Rv3146 Rv3147 Rv3148 Rv3149 Rv3150 Rv3151 Rv3152 Rv3153 Rv3154 Rv3155 Rv3156 Rv3157 Rv3158	Redox Metabolism
NADH9	NADH dehydrogenase demethylmenaquinone 8 0 protons	2dmmq8[c] + h[c] + nadh[c] -> 2dmmql8[c] + nad[c]	Rv0082 Rv3145 Rv3146 Rv3147 Rv3148 Rv3149 Rv3150 Rv3151 Rv3152 Rv3153 Rv3154 Rv3155 Rv3156 Rv3157 Rv3158	Ubiquinone Metabolism
NADK	NAD kinase	atp[c] + nad[c] -> adp[c] + h[c] + nadp[c]	Rv1695	Pantothenate and CoA Metabolism
NADS2	NAD synthase glutamine hydrolysing	atp[c] + dnad[c] + gln-L[c] + h2o[c] -> amp[c] + glu-L[c] + h[c] + nad[c] + ppi[c]	Rv2438c	Glutamate Metabolism
NADTRHD	NAD transhydrogenase	nad[c] + nadph[c] -> nadh[c] + nadp[c]	Rv0155 Rv0156 Rv0157	Pantothenate and CoA Metabolism
NAKtr	potassium sodium antiporter	k[c] + na1[e] <=> k[e] + na1[c]	Rv3236c	Transport
NAPRTr	NAPRTase rev	h[c] + nac[c] + prpp[c] <=> nicrnt[c] + ppi[c]	Rv0573c Rv1330c	Pantothenate and CoA Metabolism
NARK	nark	no2[c] -> no2[e]	Rv0261c Rv0267 Rv1737c Rv2329c	Transport
NAt3_1	sodium proton antiporter HNA is 11	h[e] + na1[c] <=> h[c] + na1[e]	Rv2287	Transport
NDPK1	nucleoside diphosphate kinase ATPGDP	atp[c] + gdp[c] <=> adp[c] + gtp[c]	Rv2445c	Pyrimidine Metabolism
NDPK2	nucleoside diphosphate kinase ATPUDP	atp[c] + udp[c] <=> adp[c] + utp[c]	Rv2445c	Pyrimidine Metabolism
NDPK3	nucleoside diphosphate kinase ATPCDP	atp[c] + cdp[c] <=> adp[c] + ctp[c]	Rv2445c	Pyrimidine Metabolism
NDPK4	nucleoside diphosphate kinase ATPdTDP	atp[c] + dtdp[c] <=> adp[c] + dttp[c]	Rv2445c	Pyrimidine Metabolism
NDPK5	nucleoside diphosphate kinase ATPdGDP	atp[c] + dgdp[c] <=> adp[c] + dgtp[c]	Rv2445c	Pyrimidine Metabolism
NDPK6	nucleoside diphosphate kinase ATPdUDP	atp[c] + dudp[c] <=> adp[c] + dutp[c]	Rv2445c	Pyrimidine Metabolism
NDPK7	nucleoside diphosphate kinase ATPdCDP	atp[c] + dcdp[c] <=> adp[c] + dctp[c]	Rv2445c	Pyrimidine Metabolism
NDPK8	nucleoside diphosphate kinase ATPdADP	atp[c] + dadp[c] <=> adp[c] + datp[c]	Rv2445c	Pyrimidine Metabolism
NDPK9	nucleoside diphosphate kinase ATPIDP	atp[c] + idp[c] <=> adp[c] + itp[c]	Rv2445c	Pyrimidine Metabolism
NH4OHDs	NH4OH dissociation	h[c] + nh4oh[c] <=> h2o[c] + nh4[c]		Other Amino Acid Metabolism
NH4t	ammonia reversible transport	nh4[e] <=> nh4[c]	Rv2920c	Transport
NNAM	nicotinamidase	h2o[c] + ncam[c] -> nac[c] + nh4[c]	Rv2043c	Pantothenate and CoA Metabolism
NNAT	nicotinate nucleotide adenylyltransferase	atp[c] + h[c] + nicrnt[c] -> dnad[c] + ppi[c]	Rv2421c	Pantothenate and CoA Metabolism
NNDMBRT	Nicotinate nucleotide dimethylbenzimidazole phosphoribosyltransferase	dmbzid[c] + nicrnt[c] -> 5prdmbz[c] + h[c] + nac[c]	Rv2207	Riboflavin Metabolism
NNDPR	nicotinate nucleotide diphosphorylase carboxylating	2 h[c] + prpp[c] + quln[c] -> co2[c] + nicrnt[c] + ppi[c]	Rv1596	Pantothenate and CoA Metabolism
NO	peroxynitrite formation spontanous	no[c] + o2s[c] -> no3[c]		Redox Metabolism
NO3R1	Nitrate reductase Ubiquinol 8	2 h[c] + no3[c] + q8h2[c] -> h2o[c] + 2 h[e] + no2[c] + q8[c]	Rv1161 Rv1162 Rv1163 Rv1164	Cofactor Metabolism
NO3R2	Nitrate reductase Menaquinol 8	2 h[c] + mql8[c] + no3[c] -> h2o[c] + 2 h[e] + mqn8[c] + no2[c]	Rv1161 Rv1162 Rv1163 Rv1164	Cofactor Metabolism
NMO	2 Nitropropane Dioxygenase	ethn[c] + fmnh2[c] + o2[c] <=> acald[c] + no2[c] + fmn[c] + h2o[c]	Rv0021c Rv1533 Rv1894c	Cofactor Metabolism
NO3t7	nitrate transport in via nitrite antiport	no2[c] + no3[e] -> no2[e] + no3[c]	Rv1737c	Transport
NOt	NO transport diffusion	no[e] <=> no[c]		Transport
NPHS	naphthoate synthase	sbzcoa[c] -> coa[c] + dhna[c]	Rv0548c	Ubiquinone Metabolism
NTD1	5 nucleotidase dUMP	dump[c] + h2o[c] -> duri[c] + pi[c]		Pyrimidine Metabolism
NTD10	5 nucleotidase XMP	h2o[c] + xmp[c] -> pi[c] + xtsn[c]		Nucleotide Sugar Metabolism
NTD11	5 nucleotidase IMP	h2o[c] + imp[c] -> ins[c] + pi[c]		Nucleotide Sugar Metabolism
NTD2	5 nucleotidase UMP	h2o[c] + ump[c] -> pi[c] + uri[c]		Pyrimidine Metabolism
NTD3	5 nucleotidase dCMP	dcmp[c] + h2o[c] -> dcyt[c] + pi[c]		Nucleotide Sugar Metabolism
NTD4	5 nucleotidase CMP	cmp[c] + h2o[c] -> cytd[c] + pi[c]		Pyrimidine Metabolism
NTD5	5 nucleotidase dTMP	dtmp[c] + h2o[c] -> pi[c] + thymd[c]		Nucleotide Sugar Metabolism
NTD6	5 nucleotidase dAMP	damp[c] + h2o[c] -> dad-2[c] + pi[c]		Nucleotide Sugar Metabolism
NTD7	5 nucleotidase AMP	amp[c] + h2o[c] -> adn[c] + pi[c]		Nucleotide Sugar Metabolism
NTD8	5 nucleotidase dGMP	dgmp[c] + h2o[c] -> dgsn[c] + pi[c]		Nucleotide Sugar Metabolism
NTD9	5 nucleotidase GMP	gmp[c] + h2o[c] -> gsn[c] + pi[c]		Nucleotide Sugar Metabolism
NTPP2	Nucleoside triphosphate pyrophosphorylase gtp	gtp[c] + h2o[c] -> gmp[c] + h[c] + ppi[c]		Nucleotide Sugar Metabolism
NTPP3	Nucleoside triphosphate pyrophosphorylase dctp	dctp[c] + h2o[c] -> dcmp[c] + h[c] + ppi[c]	Rv1160	Nucleotide Sugar Metabolism
NTPP4	Nucleoside triphosphate pyrophosphorylase ctp	ctp[c] + h2o[c] -> cmp[c] + h[c] + ppi[c]	Rv1160	Pyrimidine Metabolism
NTPP5	Nucleoside triphosphate pyrophosphorylase datp	datp[c] + h2o[c] -> damp[c] + h[c] + ppi[c]		Nucleotide Sugar Metabolism
NTPP7	Nucleoside triphosphate pyrophosphorylase dttp	dttp[c] + h2o[c] -> dtmp[c] + h[c] + ppi[c]		Nucleotide Sugar Metabolism
NTPP8	Nucleoside triphosphate pyrophosphorylase utp	h2o[c] + utp[c] -> h[c] + ppi[c] + ump[c]		Nucleotide Sugar Metabolism
NTPTP1	Nucleoside triphosphate tripolyhydrolase	dgtp[c] + h2o[c] -> dgsn[c] + pppi[c]	Rv2344c	Purine Metabolism
NTPTP2	Nucleoside triphosphate tripolyhydrolase	gtp[c] + h2o[c] -> gsn[c] + pppi[c]	Rv2344c	Purine Metabolism
NTRIR2x	nitrite Reductase NADH	5 h[c] + 3 nadh[c] + no2[c] -> 2 h2o[c] + 3 nad[c] + nh4[c]	Rv0252 Rv0253 Rv2391	Cofactor Metabolism
NTRIRx	nitrite reductase NADH	4 h[c] + 3 nadh[c] + no2[c] -> h2o[c] + 3 nad[c] + nh4oh[c]	Rv0252 Rv0253 Rv2391	Cofactor Metabolism
NTRIRy	nitrite reductase NADPH	4 h[c] + 3 nadph[c] + no2[c] -> h2o[c] + 3 nadp[c] + nh4oh[c]	Rv0252 Rv0253 Rv2391	Cofactor Metabolism
O16RHAT	rhamnosyltransferase LPS O16 antigen biosynthesis	dtdprmn[c] + unaga[c] -> dtdp[c] + h[c] + ragund[c]	Rv1525 Rv3265c	Arabinogalactan Synthesis
O2t	o2 transport diffusion	o2[e] <=> o2[c]		Transport
OCBT	ornithine carbamoyltransferase	cbp[c] + orn[c] <=> citr-L[c] + h[c] + pi[c]	Rv1656	Arginine and Proline Metabolism
OCDCAt2	Octadecanoate transport via proton symport	h[e] + ocdca[e] -> h[c] + ocdca[c]		Transport
OCOAT1r	3 oxoacid CoA transferase	acac[c] + succoa[c] <=> aacoa[c] + succ[c]	Rv2503c Rv2504c	Fatty Acid Metabolism
OCTDPS	Octaprenyl pyrophosphate synthase	frdp[c] + 5 ipdp[c] -> octdp[c] + 5 ppi[c]		Cofactor Metabolism
OHPBAT	O Phospho 4 hydroxy L threonine2 oxoglutarate aminotransferase	glu-L[c] + ohpb[c] <=> akg[c] + phthr[c]	Rv0884c	Cofactor Metabolism
OMCDC	2 Oxo 4 methyl 3 carboxypentanoate decarboxylation	3c4mop[c] + h[c] -> 4mop[c] + co2[c]		Valine Leucine and Isoleucine Metabolism
OMPDC	orotidine 5 phosphate decarboxylase	h[c] + orot5p[c] -> co2[c] + ump[c]	Rv1385	Pyrimidine Metabolism
OPAH	5 Oxoproline amidohydrolase ATP hydrolysing	5oxpro[c] + atp[c] + 2 h2o[c] <=> adp[c] + glu-L[c] + h[c] + pi[c]	Rv0266c	Glutamate Metabolism
ORNTA	ornithine transaminase	akg[c] + orn[c] -> glu5sa[c] + glu-L[c]	Rv2321c Rv2322c	Arginine and Proline Metabolism
ORNTAC	ornithine transacetylase	acorn[c] + glu-L[c] <=> acglu[c] + orn[c]	Rv1653	Urea Cycle
ORNt	ornithine transport via diffusion extracellular to periplasm	orn[e] <=> orn[c]	Rv2320c	Transport
ORPT	orotate phosphoribosyltransferase	orot5p[c] + ppi[c] <=> orot[c] + prpp[c]	Rv0382c	Pyrimidine Metabolism
OXACOAL	oxalate coa ligase	atp[c] + coa[c] + oxa[c] <=> amp[c] + oxalcoa[c] + ppi[c]		Glyoxylate Metabolism
OXCDC	Oxalyl CoA decarboxylase	h[c] + oxalcoa[c] -> co2[c] + forcoa[c]	Rv0118c	Glyoxylate Metabolism
OXGDC	2 oxoglutarate decarboxylase	akg[c] + h[c] -> co2[c] + sucsal[c]	Rv1248c	Citric Acid Cycle
OXGDC2	2 oxoglutarate decarboxylase	akg[c] + h[c] + thmpp[c] -> co2[c] + ssaltpp[c]	Rv0555	Ubiquinone Metabolism
P5CD	1 pyrroline 5 carboxylate dehydrogenase	1pyr5c[c] + 2 h2o[c] + nad[c] -> glu-L[c] + h[c] + nadh[c]	Rv1187	Glutamate Metabolism
P5CR	pyrroline 5 carboxylate reductase	1pyr5c[c] + 2 h[c] + nadph[c] -> nadp[c] + pro-L[c]	Rv0500	Arginine and Proline Metabolism
P5CRx	pyrroline 5 carboxylate reductase	1pyr5c[c] + 2 h[c] + nadh[c] -> nad[c] + pro-L[c]	Rv0500	Arginine and Proline Metabolism
PACt2r	phenylacetate transport in via proton symporter	h[e] + pac[e] <=> h[c] + pac[c]		Transport
PANTS	pantothenate synthase	ala-B[c] + atp[c] + pant-R[c] -> amp[c] + h[c] + pnto-R[c] + ppi[c]	Rv3602c	Pantothenate and CoA Metabolism
PAPA160	Phosphatidate phosphatase n C160	h2o[c] + pa160[c] -> 12dgr160[c] + pi[c]	Rv1755c	Fatty Acid Metabolism
PAPPT1	phospho N acetylmuramoyl pentapeptide transferase alpha glutamate	uAgla[c] + udcpp[c] -> uaAgla[c] + ump[c]	Rv2156c	Peptidoglycan Metabolism
PAPPT2	phospho N acetylmuramoyl pentapeptide transferase gamma glutamate	uGgla[c] + udcpp[c] -> uaGgla[c] + ump[c]	Rv2156c	Peptidoglycan Metabolism
PAPPT3	phospho N acetylmuramoyl pentapeptide transferase meso 2 6 diaminopimelate	udcpp[c] + ugmda[c] -> uagmda[c] + ump[c]	Rv2156c	Peptidoglycan Metabolism
PAPR	Phosphoadenosine phosphosulfate reductase	paps[c] + trdrd[c] <=> 2 h[c] + pap[c] + so3[c] + trdox[c]	Rv2392	Other Amino Acid Metabolism
PATS	penta acyl trehalose synthesis	5 h[c] + ocdca[c] + 4 tmlgnc[c] + tre[c] -> 5 h2o[c] + pat[c]		Membrane Metabolism
PC	pyruvate carboxylase	atp[c] + hco3[c] + pyr[c] -> adp[c] + h[c] + oaa[c] + pi[c]	Rv2697c Rv2967c	Citric Acid Cycle
PC11M	precorrin 4 C11 methyltransferase	amet[c] + pre4[c] -> ahcys[c] + h[c] + pre5[c]	Rv2071c	Cofactor Metabolism
PC17M	precorrin 3B C17 methyltransferase	amet[c] + pre3b[c] -> ahcys[c] + 3 h[c] + pre4[c]	Rv2066	Cofactor Metabolism
PC20M	precorrin 2 C20 methyltransferase	amet[c] + dscl[c] -> ahcys[c] + h[c] + pre3a[c]	Rv2066	Cofactor Metabolism
PC6AR	precorrin 6A reductase	h[c] + nadph[c] + pre6a[c] -> nadp[c] + pre6b[c]	Rv2070c	Cofactor Metabolism
PC6YM	precorrin 6Y C5 15 methyltransferase decarboxylating	2 amet[c] + pre6b[c] -> 2 ahcys[c] + co2[c] + 2 h[c] + pre8[c]	Rv2072c	Cofactor Metabolism
PC8XM	precorrin 8X methylmutase	h[c] + pre8[c] -> hgbyr[c]	Rv2065	Cofactor Metabolism
PDE1	3 5 cyclic nucleotide phosphodiesterase	camp[c] + h2o[c] -> amp[c] + h[c]	Rv0805	Purine Metabolism
PDE4	3 5 cyclic nucleotide phosphodiesterase	35cgmp[c] + h2o[c] -> gmp[c] + h[c]	Rv0805	Purine Metabolism
PDH	pyruvate dehydrogenase	coa[c] + nad[c] + pyr[c] -> accoa[c] + co2[c] + nadh[c]	Rv0462 Rv0843 Rv2215 Rv2241	Glycolysis
PDHa	pyruvate dehydrogenase lipoamide	h[c] + lpam[c] + pyr[c] -> adhlam[c] + co2[c]	Rv0462 Rv0843 Rv2496c Rv2497c	Glycolysis
PDHbr	pyruvate dehydrogenase dihydrolipoamide reversible	adhlam[c] + coa[c] <=> accoa[c] + dhlam[c]	Rv2495c	Glycolysis
PDHc	pyruvate dehydrogenase dihydrolipoamide dehydrogenase	dhlam[c] + nad[c] -> h[c] + lpam[c] + nadh[c]	Rv0462 Rv0843	Citric Acid Cycle
PDHcr	Pyruvate dehydrogenase dihydrolipoamide dehydrogenase reversible	dhlam[c] + nad[c] <=> h[c] + lpam[c] + nadh[c]	Rv0794c Rv3303c	Glycolysis
PDIMAS	PDIM A synthesis Mycobacterium Tuberculosis	2 h[c] + phthiocerol[c] + 2 tamocta[c] -> 2 h2o[c] + pdima[c]	Rv2941	Membrane Metabolism
PDIMAT	pdima translocase	pdima[c] -> pdima[e]	Rv2945c	Transport
PDX5PO	pyridoxine 5 phosphate oxidase	o2[c] + pdx5p[c] <=> h2o2[c] + pydx5p[c]	Rv2607	Pantothenate and CoA Metabolism
PEAMNO	Phenethylamine oxidase	h2o[c] + o2[c] + peamn[c] -> h2o2[c] + nh4[c] + pacald[c]		Phenylalanine Tyrosine Tryptophan Metabolism
PEPCK_re	phosphoenolpyruvate carboxykinase GTP	gtp[c] + oaa[c] <=> co2[c] + gdp[c] + pep[c]	Rv0211	Citric Acid Cycle
PERD	Erythronate 4 phosphate 4per dehydrogenase	4per[c] + nad[c] <=> h[c] + nadh[c] + ohpb[c]		Cofactor Metabolism
PFK	phosphofructokinase	atp[c] + f6p[c] -> adp[c] + fdp[c] + h[c]	Rv2029c Rv3010c	Glycolysis
PFL	pyruvate formate lyase	coa[c] + pyr[c] -> accoa[c] + for[c]		Pyruvate Metabolism
PGAMT	phosphoglucosamine mutase	gam1p[c] <=> gam6p[c]		Other Amino Acid Metabolism
PGCD	phosphoglycerate dehydrogenase	3pg[c] + nad[c] -> 3php[c] + h[c] + nadh[c]	Rv0728c Rv2996c	Glycine Serine and Threonine Metabolism
PGI	glucose 6 phosphate isomerase	g6p[c] <=> f6p[c]	Rv0946c	Glycolysis
PGK	phosphoglycerate kinase	3pg[c] + atp[c] <=> 13dpg[c] + adp[c]	Rv1437	Glycolysis
PGL	6 phosphogluconolactonase	6pgl[c] + h2o[c] -> 6pgc[c] + h[c]	Rv1445c	Pentose Phosphate Pathway
PGLS	methoxy fucose rhamnose rhamnose phenol phthiocerol dimycocerosate synthesis	4 amet[c] + frrppdima[c] -> 4 ahcys[c] + 4 h[c] + mfrrppdima[c]		Membrane Metabolism
PGLYCP	Phosphoglycolate phosphatase	2pglyc[c] + h2o[c] -> glyclt[c] + pi[c]	Rv2233	Glyoxylate Metabolism
PGM	phosphoglycerate mutase	2pg[c] <=> 3pg[c]	Rv0489 Rv2419c Rv2135c	Glycolysis
PGMT	phosphoglucomutase	g1p[c] <=> g6p[c]	Rv3068c Rv3400	Glycolysis
PGPP160	phosphatidylglycerol phosphate phosphatase n C160	h2o[c] + pgp160[c] -> pg160[c] + pi[c]		Membrane Metabolism
PGPP160190	phosphatidylglycerol phosphate phosphatase C160 C190	h2o[c] + pgp160190[c] -> pg160190[c] + pi[c]		Membrane Metabolism
PGPP190	phosphatidylglycerol phosphate phosphatase C190	h2o[c] + pgp190[c] -> pg190[c] + pi[c]		Membrane Metabolism
PGPPT3	phospho N glycolylmuramoyl pentapeptide transferase meso 2 6 diaminopimelate	udcpp[c] + uggmda[c] -> ugggmda[c] + ump[c]	Rv2156c	Peptidoglycan Metabolism
PGSA160	Phosphatidylglycerol synthase n C160	cdpdhdecg[c] + glyc3p[c] -> cmp[c] + h[c] + pgp160[c]	Rv1822 Rv2746c	Fatty Acid Metabolism
PGSA160190	Phosphatidylglycerol synthase C160 C190	cdpc16c19g[c] + glyc3p[c] -> cmp[c] + h[c] + pgp160190[c]	Rv1822 Rv2746c	Membrane Metabolism
PGSA190	Phosphatidylglycerol synthase C190	cdpc19c19g[c] + glyc3p[c] -> cmp[c] + h[c] + pgp190[c]	Rv1822 Rv2746c	Membrane Metabolism
PHDCATA	transacylase	ACP[c] + phdcacoa[c] <=> coa[c] + phdcaACP[c]		Fatty Acid Metabolism
PHDCAt	phenol palmitic acid via diffusion extracellular	phdca[e] <=> phdca[c]		Transport
PHETA1	phenylalanine transaminase	akg[c] + phe-L[c] <=> glu-L[c] + phpyr[c]		Other Amino Acid Metabolism
PHEt2r	L phenylalanine reversible transport via proton symport	h[e] + phe-L[e] <=> h[c] + phe-L[c]		Transport
PHTHCLR1	phthiocol reductase NAD	nad[c] + phthclh2[c] <=> h[c] + nadh[c] + phthcl[c]		Ubiquinone Metabolism
PHTHCLR2	phthiocol reductase NAD	nadp[c] + phthclh2[c] <=> h[c] + nadph[c] + phthcl[c]		Ubiquinone Metabolism
PHTHCLS	phthiocol synthesis	h[c] + mndn[c] + nadph[c] + o2[c] -> h2o[c] + nadp[c] + phthcl[c]		Ubiquinone Metabolism
PHTHDLS	phthiodolone synthesis	h[c] + prephth[c] -> co2[c] + phthdl[c]		Membrane Metabolism
PHTHDLS2	phenolphthiodolone synthesis	h[c] + prepphth[c] -> co2[c] + pphthdl[c]		Membrane Metabolism
PHTHS	phthiocerol synthesis	amet[c] + nadph[c] + phthdl[c] -> ahcys[c] + nadp[c] + phthiocerol[c]		Membrane Metabolism
PHTHS2	phenolphthiocerol synthesis	amet[c] + nadph[c] + pphthdl[c] -> ahcys[c] + nadp[c] + pphthiocerol[c]		Membrane Metabolism
PHTO	phthiocol oxygenase	2 o2[c] + phthclh2[c] -> 2 h[c] + 2 o2s[c] + phthcl[c]		Ubiquinone Metabolism
PHYCBOXL	L Phenylalanine carboxy lyase	h[c] + phe-L[c] -> co2[c] + peamn[c]	Rv2531c	Phenylalanine Tyrosine Tryptophan Metabolism
PIabc	phosphate transport via ABC system	atp[c] + h2o[c] + pi[e] -> adp[c] + h[c] + 2 pi[c]	Rv0820 Rv0936	Transport
PIt	Inorganic phosphate exchange diffusion	pi[c] <=> pi[e]	Rv0545c Rv2281	Transport
PLCD	phospholipase C	h2o[c] + ptd1ino160[c] -> 12dgr160[c] + h[c] + mi1p-D[c]	Rv1755c	Fatty Acid Metabolism
PLIPA1E160	Phospholipase A1 phosphatidylethanolamine n C160	h2o[c] + pe160[c] -> 2agpe160[c] + h[c] + hdca[c]		Fatty Acid Metabolism
PLIPA1E180	Phospholipase A1 phosphatidylethanolamine n C180	h2o[c] + pe180[c] -> 2agpe180[c] + h[c] + ocdca[c]		Fatty Acid Metabolism
PMANM	phosphomannomutase	man1p[c] <=> man6p[c]	Rv3257c Rv3308 Rv3441c	Sugar Metabolism
PMDPHT	pyrimidine phosphatase	5aprbu[c] + h2o[c] -> 4r5au[c] + pi[c]		Cofactor Metabolism
PMPK	phosphomethylpyrimidine kinase	4ampm[c] + atp[c] -> 2mahmp[c] + adp[c]	Rv0422c	Thiamine Metabolism
PNCDC	pantothenoylcysteine decarboxylase	h[c] + ptcys[c] -> co2[c] + ptth[c]	Rv1092c	Cofactor Metabolism
PNTK	pantothenate kinase	atp[c] + pnto-R[c] -> 4ppan[c] + adp[c] + h[c]	Rv1092c Rv3600c	Pantothenate and CoA Metabolism
PPA	inorganic diphosphatase	h2o[c] + ppi[c] -> h[c] + 2 pi[c]	Rv3628	Miscellaneous
PPAtr	Propionate transport diffusion	ppa[e] <=> ppa[c]		Transport
PPBNGS	porphobilinogen synthase	2 5aop[c] -> 2 h2o[c] + h[c] + ppbng[c]	Rv0512	Porphyrin Metabolism
PPCDC	phosphopantothenoylcysteine decarboxylase	4ppcys[c] + h[c] -> co2[c] + pan4p[c]	Rv1391	Pantothenate and CoA Metabolism
PPCKr	phosphoenolpyruvate carboxykinase	atp[c] + oaa[c] <=> adp[c] + co2[c] + pep[c]	Rv0211	Citric Acid Cycle
PPCOAC	Propionyl CoA carboxylase	atp[c] + hco3[c] + ppcoa[c] -> adp[c] + h[c] + mmcoa-S[c] + pi[c]	Rv0973c Rv0974c Rv2247 Rv2501c Rv2502c Rv3285	Sugar Metabolism
PPCSCT	Propanoyl CoA succinate CoA transferase	ppcoa[c] + succ[c] -> ppa[c] + succoa[c]		Citric Acid Cycle
PPDIMAS	PPDIM synthesis Mycobacterium Tuberculosis	2 h[c] + pphthiocerol[c] + 2 tamocta[c] -> 2 h2o[c] + ppdima[c]	Rv2941	Membrane Metabolism
PPDIMAT	ppdima translocase	ppdima[c] -> ppdima[e]	Rv2945c	Transport
PPDK	Pyruvate phosphate dikinase	atp[c] + pi[c] + pyr[c] -> amp[c] + h[c] + pep[c] + ppi[c]	Rv1127c	Pyruvate Metabolism
PPGKr	Polyphosphate glucokinase reversible	glc-D[c] + pi[c] <=> g6p[c] + h2o[c]	Rv2702	Glycolysis
PPK2	polyphosphate kinase	atp[c] + ppi[c] -> adp[c] + pppi[c]	Rv2984	Purine Metabolism
PPNCL	phosphopantothenate cysteine ligase	4ppan[c] + ctp[c] + cys-L[c] -> 4ppcys[c] + cdp[c] + h[c] + pi[c]	Rv1391	Cofactor Metabolism
PPNCL2	phosphopantothenate cysteine ligase	4ppan[c] + ctp[c] + cys-L[c] -> 4ppcys[c] + cmp[c] + h[c] + ppi[c]	Rv1391	Pantothenate and CoA Metabolism
PPNCL3	phosphopantothenate cysteine ligase	4ppan[c] + atp[c] + cys-L[c] -> 4ppcys[c] + amp[c] + h[c] + ppi[c]	Rv1391	Cofactor Metabolism
PPND	prephenate dehydrogenase	nad[c] + pphn[c] -> 34hpp[c] + co2[c] + nadh[c]	Rv3754	Phenylalanine Tyrosine Tryptophan Metabolism
PPNDH	prephenate dehydratase	h[c] + pphn[c] -> co2[c] + h2o[c] + phpyr[c]	Rv3838c	Phenylalanine Tyrosine Tryptophan Metabolism
PPPGO	protoporphyrinogen oxidase aerobic	1.5 o2[c] + pppg9[c] -> 3 h2o[c] + ppp9[c]	Rv2677c	Porphyrin Metabolism
PPTGS	Peptidoglycan subunit synthesis	uaagmda[c] -> h[c] + peptido-EC[c] + udcpdp[c]	Rv2163c Rv0016c Rv2911 Rv3330 Rv3627c	Peptidoglycan Metabolism
PPTGS_TB1	Peptidoglycan subunit synthesis	uaaAgla[c] -> h[c] + peptido-TB1[c] + udcpdp[c]	Rv2163c Rv0016c Rv2911 Rv3330 Rv3627c	Peptidoglycan Metabolism
PPTGS_TB2	Peptidoglycan subunit synthesis	uaaGgla[c] -> h[c] + peptido-TB2[c] + udcpdp[c]	Rv2163c Rv0016c Rv2911 Rv3330 Rv3627c	Peptidoglycan Metabolism
PRAGSr	phosphoribosylglycinamide synthase	atp[c] + gly[c] + pram[c] <=> adp[c] + gar[c] + h[c] + pi[c]	Rv0772	Purine Metabolism
PRAIS	phosphoribosylaminoimidazole synthase	atp[c] + fpram[c] -> adp[c] + air[c] + 2 h[c] + pi[c]	Rv0809	Purine Metabolism
PRAIi	phosphoribosylanthranilate isomerase irreversible	pran[c] -> 2cpr5p[c]	Rv1603	Histidine Metabolism
PRAMPC	phosphoribosyl AMP cyclohydrolase	h2o[c] + prbamp[c] -> prfp[c]	Rv1606	Histidine Metabolism
PRASCS	phosphoribosylaminoimidazolesuccinocarboxamide synthase	5aizc[c] + asp-L[c] + atp[c] <=> 25aics[c] + adp[c] + h[c] + pi[c]	Rv0780	Purine Metabolism
PRATPP	phosphoribosyl ATP pyrophosphatase	h2o[c] + prbatp[c] -> h[c] + ppi[c] + prbamp[c]	Rv2122c	Histidine Metabolism
PRDX	Peroxidase multiple substrates	h2o2[c] + meoh[c] -> fald[c] + 2 h2o[c]	Rv1908c	Redox Metabolism
PREPHACPH	fatty acyl ACP hydrolase	h2o[c] + prephthACP[c] -> ACP[c] + h[c] + prephth[c]	Rv2928	Membrane Metabolism
PREPPACPH	fatty acyl ACP hydrolase	h2o[c] + prepphthACP[c] -> ACP[c] + h[c] + prepphth[c]	Rv2928	Membrane Metabolism
PREPTHS	phthiocerol precursor synthesis	arachACP[c] + 14 h[c] + 2 malcoa[c] + 2 mmcoa-S[c] + 10 nadph[c] -> 2 co2[c] + 4 coa[c] + 5 h2o[c] + 10 nadp[c] + prephthACP[c]	Rv2931 Rv2932 Rv2933 Rv2934 Rv2935	Membrane Metabolism
PREPTHS2	phenolic phthiocerol precursor synthesis	14 h[c] + 2 malcoa[c] + 2 mmcoa-S[c] + 10 nadph[c] + phdcaACP[c] -> 2 co2[c] + 4 coa[c] + 5 h2o[c] + 10 nadp[c] + prepphthACP[c]	Rv2931 Rv2932 Rv2933 Rv2934 Rv2935	Membrane Metabolism
PREPTTA	phthiocerol precursor ACP transacylase	ACP[c] + prephthcoa[c] <=> coa[c] + prephthACP[c]		Membrane Metabolism
PRFGS	phosphoribosylformylglycinamidine synthase	atp[c] + fgam[c] + gln-L[c] + h2o[c] -> adp[c] + fpram[c] + glu-L[c] + h[c] + pi[c]	Rv0788 Rv0803	Purine Metabolism
PRMICIi	1 5 phosphoribosyl 5 5 phosphoribosylamino methylideneamino imidazole 4 carboxamide isomerase irreversible	prfp[c] -> prlp[c]	Rv1603	Histidine Metabolism
PROD2	Proline dehydrogenase	fad[c] + pro-L[c] -> 1pyr5c[c] + fadh2[c] + h[c]	Rv1188	Arginine and Proline Metabolism
PROabc	L proline transport via ABC system	atp[c] + h2o[c] + pro-L[e] -> adp[c] + h[c] + pi[c] + pro-L[c]	Rv3756c Rv3757c Rv3758c Rv3759c	Transport
PROt2r	L proline reversible transport via proton symport	h[e] + pro-L[e] <=> h[c] + pro-L[c]		Transport
PRPPS	phosphoribosylpyrophosphate synthetase	atp[c] + r5p[c] <=> amp[c] + h[c] + prpp[c]	Rv1017c	Pentose Phosphate Pathway
PSCVT	3 phosphoshikimate 1 carboxyvinyltransferase	pep[c] + skm5p[c] <=> 3psme[c] + pi[c]	Rv3227	Phenylalanine Tyrosine Tryptophan Metabolism
PSD160	Phosphatidylserine decarboxylase n C160	h[c] + ps160[c] -> co2[c] + pe160[c]	Rv0437c	Fatty Acid Metabolism
PSD180	Phosphatidylserine decarboxylase n C180	h[c] + ps180[c] -> co2[c] + pe180[c]	Rv0437c	Fatty Acid Metabolism
PSERT	phosphoserine transaminase	3php[c] + glu-L[c] -> akg[c] + pser-L[c]	Rv0884c	Glycine Serine and Threonine Metabolism
PSP_L	phosphoserine phosphatase L serine	h2o[c] + pser-L[c] -> pi[c] + ser-L[c]	Rv0505c Rv3042c	Glycine Serine and Threonine Metabolism
PSSA160	Phosphatidylserine syntase n C160	cdpdhdecg[c] + ser-L[c] -> cmp[c] + h[c] + ps160[c]	Rv0436c	Fatty Acid Metabolism
PSSA180	Phosphatidylserine syntase n C180	cdpdodecg[c] + ser-L[c] -> cmp[c] + h[c] + ps180[c]	Rv0436c	Fatty Acid Metabolism
PTAr	phosphotransacetylase	accoa[c] + pi[c] <=> actp[c] + coa[c]	Rv0408 Rv3914	Pyruvate Metabolism
PTPATi	pantetheine phosphate adenylyltransferase	atp[c] + h[c] + pan4p[c] -> dpcoa[c] + ppi[c]	Rv2965c	Pantothenate and CoA Metabolism
PUNP1	purine nucleoside phosphorylase Adenosine	adn[c] + pi[c] <=> ade[c] + r1p[c]	Rv3307	Purine Metabolism
PUNP2	purine nucleoside phosphorylase Deoxyadenosine	dad-2[c] + pi[c] <=> 2dr1p[c] + ade[c]	Rv3307	Purine Metabolism
PUNP3	purine nucleoside phosphorylase Guanosine	gsn[c] + pi[c] <=> gua[c] + r1p[c]	Rv3307	Purine Metabolism
PUNP4	purine nucleoside phosphorylase Deoxyguanosine	dgsn[c] + pi[c] <=> 2dr1p[c] + gua[c]	Rv3307	Purine Metabolism
PUNP5	purine nucleoside phosphorylase Inosine	ins[c] + pi[c] <=> hxan[c] + r1p[c]	Rv3307	Purine Metabolism
PUNP6	purine nucleoside phosphorylase Deoxyinosine	din[c] + pi[c] <=> 2dr1p[c] + hxan[c]	Rv3307	Purine Metabolism
PUNP7	purine nucleoside phosphorylase Xanthosine	pi[c] + xtsn[c] <=> r1p[c] + xan[c]	Rv3307	Purine Metabolism
PYAM5PO	pyridoxamine 5 phosphate oxidase	h2o[c] + o2[c] + pyam5p[c] -> h2o2[c] + nh4[c] + pydx5p[c]	Rv0121c Rv1155 Rv2074 Rv2607	Pantothenate and CoA Metabolism
PYDXNO	pyridoxine oxidase	o2[c] + pydxn[c] <=> h2o2[c] + pydx[c]	Rv2607	Cofactor Metabolism
PYDXO	pyridoxal oxidase	2 h2o[c] + nh4[c] + 0.5 o2[c] + pydx[c] <=> 2 h2o2[c] + pydam[c]	Rv2607	Cofactor Metabolism
PYK	pyruvate kinase	adp[c] + h[c] + pep[c] -> atp[c] + pyr[c]	Rv1617	Glycolysis
PYRDC	pyruvate decarboxylase	h[c] + pyr[c] -> acald[c] + co2[c]	Rv0162c	Glycolysis
PYRt2r	pyruvate reversible transport via proton symport	h[e] + pyr[e] <=> h[c] + pyr[c]	Rv1902c	Transport
QRr	Quinone reductase	h[c] + nadph[c] + q[c] <=> nadp[c] + qh2[c]	Rv3777	Redox Metabolism
QULNS	quinolinate synthase	dhap[c] + iasp[c] -> 2 h2o[c] + pi[c] + quln[c]	Rv1594	Pantothenate and CoA Metabolism
R05217	Precorrin 3A Oxygen Precorrin 3B	h[c] + 0.5 o2[c] + pre3a[c] -> pre3b[c]	Rv2064	Cofactor Metabolism
R05219	Precorrin 5 Precorrin 6X	amet[c] + h2o[c] + pre5[c] -> ac[c] + ahcys[c] + h[c] + pre6a[c]		Cofactor Metabolism
R05224	Hydrogenobyrinate Hydrogenobyrinate a c diamide	2 atp[c] + 2 gln-L[c] + h2o[c] + hgbyr[c] -> 2 adp[c] + 2 glu-L[c] + h[c] + hgbam[c] + ppi[c]	Rv2848c	Cofactor Metabolism
RBFK	riboflavin kinase	atp[c] + ribflv[c] -> adp[c] + fmn[c] + h[c]	Rv2786c	Riboflavin Metabolism
RBFSa	riboflavin synthase	4r5au[c] + db4p[c] -> dmlz[c] + 2 h2o[c] + pi[c]	Rv1412 Rv1416	Riboflavin Metabolism
RBFSb	riboflavin synthase	2 dmlz[c] -> 4r5au[c] + ribflv[c]	Rv1412 Rv1416	Riboflavin Metabolism
RBK	ribokinase	atp[c] + rib-D[c] -> adp[c] + h[c] + r5p[c]	Rv2436	Pentose Phosphate Pathway
RBK_Dr	D ribulokinase reversible	atp[c] + rbl-D[c] <=> adp[c] + h[c] + ru5p-D[c]		Sugar Metabolism
RBK_L1r	L ribulokinase L ribulose reversible	atp[c] + rbl-L[c] <=> adp[c] + h[c] + ru5p-L[c]		Sugar Metabolism
RIBabc	D ribose transport via ABC system	atp[c] + h2o[c] + rib-D[e] -> adp[c] + h[c] + pi[c] + rib-D[c]	Rv1236 Rv1237 Rv1238	Transport
RNDR1	ribonucleoside diphosphate reductase ADP	adp[c] + trdrd[c] -> dadp[c] + h2o[c] + trdox[c]	Rv0570 Rv1981c	Purine Metabolism
RNDR2	ribonucleoside diphosphate reductase GDP	gdp[c] + trdrd[c] -> dgdp[c] + h2o[c] + trdox[c]	Rv1981c Rv3048c Rv3051c Rv3052c Rv3053c	Purine Metabolism
RNDR3	ribonucleoside diphosphate reductase CDP	cdp[c] + trdrd[c] -> dcdp[c] + h2o[c] + trdox[c]	Rv1981c Rv3048c Rv3051c Rv3052c Rv3053c	Purine Metabolism
RNDR4	ribonucleoside diphosphate reductase UDP	trdrd[c] + udp[c] -> dudp[c] + h2o[c] + trdox[c]	Rv0570 Rv1981c	Purine Metabolism
RNTR4	ribonucleoside triphosphate reductase UTP	trdrd[c] + utp[c] -> dutp[c] + h2o[c] + trdox[c]		Pyrimidine Metabolism
RPE	ribulose 5 phosphate 3 epimerase	ru5p-D[c] <=> xu5p-D[c]	Rv1408	Pentose Phosphate Pathway
RPI	ribose 5 phosphate isomerase	r5p[c] <=> ru5p-D[c]	Rv2465c	Pentose Phosphate Pathway
RPPDIMAS	rhamnose phenol phthiocerol dimycocerosate synthesis	dtdprmn[c] + ppdima[c] -> dtdp[c] + h[c] + rppdima[c]	Rv2962c	Phenolic glycolipid biosynthesis
RRPPDIMAS	rhamnose rhamnose phenol phthiocerol dimycocerosate synthesis	dtdprmn[c] + rppdima[c] -> dtdp[c] + h[c] + rrppdima[c]	Rv2958c	Phenolic glycolipid biosynthesis
RZ5PP	alpha ribazole 5 phosphate phosphatase	5prdmbz[c] + h2o[c] -> pi[c] + rdmbzi[c]	Rv3113	Cofactor Metabolism
SADH	Succinylarginine dihydrolase	2 h2o[c] + 2 h[c] + sucarg[c] -> co2[c] + 2 nh4[c] + sucorn[c]		Arginine and Proline Metabolism
SADT	sulfate adenylyltransferase	atp[c] + h[c] + so4[c] -> aps[c] + ppi[c]	Rv1285 Rv1286	Purine Metabolism
SADT2	Sulfate adenyltransferase	atp[c] + gtp[c] + h2o[c] + so4[c] -> aps[c] + gdp[c] + pi[c] + ppi[c]	Rv1285 Rv1286	Other Amino Acid Metabolism
SALCS	salicylate synthase	chor[c] -> pyr[c] + salc[c]	Rv2386c	Membrane Metabolism
SDPDS	succinyl diaminopimelate desuccinylase	h2o[c] + sl26da[c] -> 26dap-LL[c] + succ[c]	Rv1202	Lysine Metabolism
SDPTA	succinyldiaminopimelate transaminase	akg[c] + sl26da[c] <=> glu-L[c] + sl2a6o[c]	Rv0858c Rv1178	Lysine Metabolism
SELCYSLY	selenocysteine lyase	dtt[c] + selcys[c] -> ala-L[c] + dttOX[c] + h[c] + seln[c]	Rv1464	Other Amino Acid Metabolism
SERAT	serine O acetyltransferase	accoa[c] + ser-L[c] <=> acser[c] + coa[c]	Rv2335	Cysteine Metabolism
SERD_D	D serine deaminase	ser-D[c] -> nh4[c] + pyr[c]	Rv0069c	Glycine Serine and Threonine Metabolism
SERD_L	L serine deaminase	ser-L[c] -> nh4[c] + pyr[c]	Rv0069c	Cysteine Metabolism
SERt2r	L serine reversible transport via proton symport	h[e] + ser-L[e] <=> h[c] + ser-L[c]	Rv1704c	Transport
SGDS	Succinylglutamate desuccinylase	h2o[c] + sucglu[c] -> glu-L[c] + succ[c]		Arginine and Proline Metabolism
SGSAD	Succinylglutamic semialdehyde dehydrogenase	h2o[c] + nad[c] + sucgsa[c] -> 2 h[c] + nadh[c] + sucglu[c]		Arginine and Proline Metabolism
SHCHCS	2 succinyl 6 hydroxy 2 4 cyclohexadiene 1 carboxylate synthase	ichor[c] + sucsal[c] -> 2shchc[c] + pyr[c]	Rv0555	Cofactor Metabolism
SHCHCS2	2 succinyl 6 hydroxy 2 4 cyclohexadiene 1 carboxylate synthase	ichor[c] + ssaltpp[c] -> 2shchc[c] + pyr[c] + thmpp[c]	Rv0555	Other Amino Acid Metabolism
SHCHD2	sirohydrochlorin dehydrogenase NAD	dscl[c] + nad[c] -> h[c] + nadh[c] + scl[c]	Rv2847c	Cofactor Metabolism
SHCHD3	sirohydrochlorin dehydrogenase NAD	nad[c] + pre2[c] -> h[c] + nadh[c] + scl2[c]	Rv2847c	Cofactor Metabolism
SHCHF	sirohydrochlorin ferrochetalase	fe2[c] + scl[c] -> 3 h[c] + sheme[c]	Rv2393 Rv2847c	Porphyrin Metabolism
SHCHF2	sirohydrochlorin ferrochetalase	fe2[c] + scl2[c] -> 2 h[c] + sheme[c]	Rv2847c	Cofactor Metabolism
SHCHF3	sirohydrochlorin ferrochetalase mycobactin	fmcbtt[c] + scl[c] -> 3 h[c] + mcbtt[c] + sheme[c]		Porphyrin Metabolism
SHK3Dr	shikimate dehydrogenase	3dhsk[c] + h[c] + nadph[c] <=> nadp[c] + skm[c]	Rv2552c	Phenylalanine Tyrosine Tryptophan Metabolism
SHKK	shikimate kinase	atp[c] + skm[c] -> adp[c] + h[c] + skm5p[c]	Rv2539c	Phenylalanine Tyrosine Tryptophan Metabolism
SHSL1r	O succinylhomoserine lyase reversible	cys-L[c] + suchms[c] <=> cyst-L[c] + h[c] + succ[c]	Rv0391 Rv1079	Cysteine Metabolism
SHSL4r	O succinylhomoserine lyase elimination reversible	h2o[c] + suchms[c] <=> 2obut[c] + h[c] + nh4[c] + succ[c]	Rv0391 Rv1079	Cysteine Metabolism
SKMt2	shikimate transport in via proton symport	h[e] + skm[e] <=> h[c] + skm[c]	Rv1200	Transport
SOTA	Succinylornithine transaminase	akg[c] + sucorn[c] -> glu-L[c] + sucgsa[c]		Arginine and Proline Metabolism
SPMS	spermidine synthase	ametam[c] + ptrc[c] -> 5mta[c] + h[c] + spmd[c]	Rv2601	Urea Cycle
SPODM	superoxide dismutase	2 h[c] + 2 o2s[c] -> h2o2[c] + o2[c]	Rv0432 Rv1908c Rv3846	Cofactor Metabolism
SSALx	succinate semialdehyde dehydrogenase NAD	h2o[c] + nad[c] + sucsal[c] -> 2 h[c] + nadh[c] + succ[c]	Rv0234c Rv1731	Glutamate Metabolism
SSALy	succinate semialdehyde dehydrogenase NADP	h2o[c] + nadp[c] + sucsal[c] -> 2 h[c] + nadph[c] + succ[c]	Rv0234c Rv1731	Glutamate Metabolism
SUCBZL	o succinylbenzoate CoA ligase	atp[c] + coa[c] + sucbz[c] -> amp[c] + ppi[c] + sbzcoa[c]	Rv0542c	Ubiquinone Metabolism
SUCBZS	O succinylbenzoate CoA synthase	2shchc[c] -> h2o[c] + sucbz[c]	Rv0553	Ubiquinone Metabolism
SUCCt2r	succinate transport via proton symport	h[e] + succ[e] <=> h[c] + succ[c]	Rv2443	Transport
SUCD1i	succinate dehydrogenase	fad[c] + succ[c] -> fadh2[c] + fum[c]	Rv0247c Rv0248c Rv3316 Rv3317 Rv3318 Rv3319	Citric Acid Cycle
SUCOAS	succinyl CoA synthetase ADP forming	atp[c] + coa[c] + succ[c] <=> adp[c] + pi[c] + succoa[c]	Rv0951 Rv0952	Citric Acid Cycle
SULR	sulfite reductase NADPH2	3 h2o[c] + h2s[c] + 3 nadp[c] <=> 5 h[c] + 3 nadph[c] + so3[c]	Rv2331A	Other Amino Acid Metabolism
SULabc	sulfate transport via ABC system	atp[c] + h2o[c] + so4[e] -> adp[c] + h[c] + pi[c] + so4[c]	Rv1707 Rv1739c Rv2397c Rv2398c Rv2399c Rv2400c	Transport
TALA	transaldolase	g3p[c] + s7p[c] <=> e4p[c] + f6p[c] + 2 h[c]	Rv1448c	Pentose Phosphate Pathway
TARTD	L tartrate dehydratase	tartr-L[c] -> h2o[c] + oaa[c]		Other Amino Acid Metabolism
TARTRt7	Tartratesuccinate antiporter	succ[c] + tartr-L[e] <=> succ[e] + tartr-L[c]	Rv1672c	Transport
TAS	tetra arabinofuranoside synthesis	arab-D[c] + 3 decda-tb[c] -> 3 decd-tb[c] + tarab-D[c]		Fatty Acid Metabolism
TATS	tetra acyl trehalose synthesis	4 h[c] + hdca[c] + hpmtria[c] + 2 omtta[c] + tre[c] -> 4 h2o[c] + tat[c]		Membrane Metabolism
TATSO	tetra acyl trehalose sulfate sulfolipid 1 synthesis	4 h[c] + hdca[c] + hpmtria[c] + 2 omtta[c] + tres[c] -> 4 h2o[c] + sl1[c]		Membrane Metabolism
TAU	taurine dioxygenase	taur[c] + akg[c] + o2[c] -> so3[c] + succ[c] + aacald[c] + co2[c] + 2 h[c]	Rv3406 Rv0097	Other Amino Acid Metabolism
TDMS1	trehalose dimycolate synthesis	2 h[c] + mmycolate[c] + mycolate[c] + tre[c] -> 2 h2o[c] + tdm1[c]		TDM biosynthesis
TDMS2	trehalose dimycolate synthesis	2 h[c] + mmmycolate[c] + mycolate[c] + tre[c] -> 2 h2o[c] + tdm2[c]		TDM biosynthesis
TDMS3	trehalose dimycolate synthesis	2 h[c] + mkmycolate[c] + mycolate[c] + tre[c] -> 2 h2o[c] + tdm3[c]		TDM biosynthesis
TDMS4	trehalose dimycolate synthesis	2 h[c] + kmycolate[c] + mycolate[c] + tre[c] -> 2 h2o[c] + tdm4[c]		TDM biosynthesis
TDPDRE	dTDP 4 dehydrorhamnose 3 5 epimerase	dtdp4d6dg[c] -> dtdp4d6dm[c]	Rv3465	Arabinogalactan Synthesis
TDPDRR	dTDP 4 dehydrorhamnose reductase	dtdp4d6dm[c] + h[c] + nadph[c] -> dtdprmn[c] + nadp[c]	Rv3266c	Arabinogalactan Synthesis
TDPGDH	dTDPglucose 4 6 dehydratase	dtdpglu[c] -> dtdp4d6dg[c] + h2o[c]	Rv3464 Rv3468c Rv3634c Rv3784	Arabinogalactan Synthesis
THD1	NAD P transhydrogenase B specific	nad[c] + nadph[c] <=> nadh[c] + nadp[c]	Rv2713	Pantothenate and CoA Metabolism
THDPS	tetrahydrodipicolinate succinylase	h2o[c] + succoa[c] + thdp[c] -> coa[c] + sl2a6o[c]	Rv1201c	Lysine Metabolism
THFGLUS	TetrahydrofolateL glutamate gamma ligase ADP forming	atp[c] + glu-L[c] + thf[c] <=> adp[c] + h[c] + pi[c] + thfglu[c]	Rv2447c	Folate Metabolism
THMDP	thiamin diphosphatase	2 h2o[c] + thmpp[c] -> h[c] + 2 pi[c] + thm[c]	Rv3113	Cofactor Metabolism
THRD_Lr	L threonine deaminse reversible	thr-L[c] <=> 2obut[c] + nh4[c]	Rv1559	Methionine Metabolism
THRS	threonine synthase	h2o[c] + phom[c] -> pi[c] + thr-L[c]	Rv1295	Glycine Serine and Threonine Metabolism
THRt2r	L threonine reversible transport via proton symport	h[e] + thr-L[e] <=> h[c] + thr-L[c]	Rv3737	Transport
THSFST	Thiosulfate Sulfurtransferase	cyan[c] + tsul[c] <=> h[c] + so3[c] + tcynt[c]	Rv2291 Rv3117	Redox Metabolism
THZPSN	thiazole phosphate synthesis	atp[c] + cys-L[c] + dxyl5p[c] + tyr-L[c] -> 4hba[c] + 4mpetz[c] + ala-L[c] + amp[c] + co2[c] + h2o[c] + h[c] + ppi[c]	Rv0417	Sugar Metabolism
THZSN	thiazole synthesis from xylulose	cys-L[c] + dxyl[c] + tyr-L[c] -> 4hba[c] + 4mhetz[c] + co2[c] + h2o[c] + h[c] + nh4[c] + pyr[c]	Rv0417	Sugar Metabolism
TKT1	transketolase	r5p[c] + xu5p-D[c] + 2 h[c] <=> g3p[c] + s7p[c]	Rv1449c	Pentose Phosphate Pathway
TKT2	transketolase	e4p[c] + xu5p-D[c] <=> f6p[c] + g3p[c]	Rv1449c	Pentose Phosphate Pathway
TMDK1	thymidine kinase ATPthymidine	atp[c] + thymd[c] -> adp[c] + dtmp[c] + h[c]		Nucleotide Sugar Metabolism
TMDPP	thymidine phosphorylase	pi[c] + thymd[c] <=> 2dr1p[c] + thym[c]	Rv3314c	Purine Metabolism
TMDS	thymidylate synthase	dump[c] + mlthf[c] -> dhf[c] + dtmp[c]	Rv2754c Rv2764c	Pyrimidine Metabolism
TMHAS1	trehalose dimycolate synthesis	tdm1[c] + tdm2[c] + tre[c] -> 2 h2o[c] + tmha1[c]		TDM biosynthesis
TMHAS2	trehalose dimycolate synthesis	tdm1[c] + tdm3[c] + tre[c] -> 2 h2o[c] + tmha2[c]		TDM biosynthesis
TMHAS3	trehalose dimycolate synthesis	tdm1[c] + tdm4[c] + tre[c] -> 2 h2o[c] + tmha3[c]		TDM biosynthesis
TMHAS4	trehalose dimycolate synthesis	tdm2[c] + tdm3[c] + tre[c] -> 2 h2o[c] + tmha4[c]		TDM biosynthesis
TMHAS5	trehalose dimycolate synthesis	tdm2[c] + tdm4[c] + tre[c] -> 2 h2o[c] + tmha5[c]		TDM biosynthesis
TMHAS6	trehalose dimycolate synthesis	tdm3[c] + tdm4[c] + tre[c] -> 2 h2o[c] + tmha6[c]		TDM biosynthesis
TMN	thiaminase	h2o[c] + thm[c] -> 4ahmmp[c] + 4mhetz[c] + h[c]		Cofactor Metabolism
TMPKr	thiamine phosphate kinase	atp[c] + thmmp[c] <=> adp[c] + thmpp[c]	Rv2977c	Thiamine Metabolism
TMPPP	thiamine phosphate diphosphorylase	2mahmp[c] + 4mpetz[c] + h[c] -> ppi[c] + thmmp[c]	Rv0414c	Thiamine Metabolism
TPI	triose phosphate isomerase	dhap[c] <=> g3p[c]	Rv1438	Glycolysis
TRDR	thioredoxin reductase NADPH	h[c] + nadph[c] + trdox[c] -> nadp[c] + trdrd[c]	Rv3913	Pyrimidine Metabolism
TRE6PP	trehalose phosphatase	h2o[c] + tre6p[c] -> pi[c] + tre[c]	Rv2006 Rv3372	Membrane Metabolism
TRE6PS	alpha alpha trehalose phosphate synthase UDP forming	g6p[c] + udpg[c] -> h[c] + tre6p[c] + udp[c]	Rv3490	Membrane Metabolism
TRESULT	trehalose sulfotransferase	paps[c] + tre[c] -> h[c] + pap[c] + tres[c]	Rv0295c Rv1373 Rv2267c Rv3529c	Membrane Metabolism
TREabc	trehalose transport via ABC system	atp[c] + h2o[c] + tre[e] -> adp[c] + h[c] + pi[c] + tre[c]	Rv1236 Rv1237 Rv1238	Transport
TRIATS	tri acyl trehalose sulfonation	3 h[c] + 2 ocdca[c] + tmlgnc[c] + tre[c] -> 3 h2o[c] + triat[c]		Membrane Metabolism
TRPS1	tryptophan synthase indoleglycerol phosphate	3ig3p[c] + ser-L[c] -> g3p[c] + h2o[c] + trp-L[c]	Rv1612 Rv1613	Phenylalanine Tyrosine Tryptophan Metabolism
TRPS2	tryptophan synthase indole	indole[c] + ser-L[c] -> h2o[c] + trp-L[c]	Rv1612 Rv1613	Phenylalanine Tyrosine Tryptophan Metabolism
TRPS3	tryptophan synthase indoleglycerol phosphate	3ig3p[c] -> g3p[c] + indole[c]	Rv1612 Rv1613	Phenylalanine Tyrosine Tryptophan Metabolism
TRPTA	tryptophan transaminase	akg[c] + trp-L[c] <=> glu-L[c] + indpyr[c]		Other Amino Acid Metabolism
TRPt2r	L tryptophan reversible transport via proton symport	h[e] + trp-L[e] <=> h[c] + trp-L[c]		Transport
TSULabc	thiosulfate transport via ABC system	atp[c] + h2o[c] + tsul[e] -> adp[c] + h[c] + pi[c] + tsul[c]	Rv1739c Rv2397c Rv2398c Rv2399c Rv2400c	Transport
TTDCAt2	Tetradecanoate transport via proton symport	h[e] + ttdca[e] -> h[c] + ttdca[c]		Transport
TYRTA	tyrosine transaminase	akg[c] + tyr-L[c] <=> 34hpp[c] + glu-L[c]		Other Amino Acid Metabolism
TYRt2r	L tyrosine reversible transport via proton symport	h[e] + tyr-L[e] <=> h[c] + tyr-L[c]		Transport
UAAGDS	UDP N acetylmuramoyl L alanyl D glutamyl meso 2 6 diaminopimelate synthetase	26dap-M[c] + atp[c] + uamag[c] -> adp[c] + h[c] + pi[c] + ugmd[c]	Rv2158c	Peptidoglycan Metabolism
UAAGLS1	UDP N acetylmuramoyl L alanyl D glutamate lysine synthetase alpha glutamate	atp[c] + lys-L[c] + uamag[c] -> adp[c] + h[c] + pi[c] + uAgl[c]		Peptidoglycan Metabolism
UAAGLS2	UDP N acetylmuramoyl L alanyl D glutamyl L lysine synthetase gamma glutamate	atp[c] + lys-L[c] + uamag[c] -> adp[c] + h[c] + pi[c] + uGgl[c]		Peptidoglycan Metabolism
UAGCVT	UDP N acetylglucosamine 1 carboxyvinyltransferase	pep[c] + uacgam[c] -> pi[c] + uaccg[c]	Rv1315	Sugar Metabolism
UAGDP	UDP N acetylglucosamine diphosphorylase	acgam1p[c] + h[c] + utp[c] -> ppi[c] + uacgam[c]	Rv1018c Rv2852c	Sugar Metabolism
UAGPT1	UDP N acetylglucosamine N acetylmuramyl pentapeptide pyrophosphoryl undecaprenol N acetylglucosamine transferase	uaAgla[c] + uacgam[c] -> h[c] + uaaAgla[c] + udp[c]	Rv2153c	Peptidoglycan Metabolism
UAGPT2	UDP N acetylglucosamine N acetylmuramyl pentapeptide pyrophosphoryl undecaprenol N acetylglucosamine transferase	uaGgla[c] + uacgam[c] -> h[c] + uaaGgla[c] + udp[c]	Rv2153c	Peptidoglycan Metabolism
UAGPT3	UDP N acetylglucosamine N acetylmuramyl pentapeptide pyrophosphoryl undecaprenol N acetylglucosamine transferase	uacgam[c] + uagmda[c] -> h[c] + uaagmda[c] + udp[c]	Rv2153c	Peptidoglycan Metabolism
UAMAGS	UDP N acetylmuramoyl L alanyl D glutamate synthetase	atp[c] + glu-D[c] + uama[c] -> adp[c] + h[c] + pi[c] + uamag[c]	Rv2155c	Peptidoglycan Metabolism
UAMAS	UDP N acetylmuramoyl L alanine synthetase	ala-L[c] + atp[c] + uamr[c] -> adp[c] + h[c] + pi[c] + uama[c]	Rv2152c	Peptidoglycan Metabolism
UAMRH	UDP MurNAc Hydroxylase	h[c] + nadph[c] + o2[c] + uamr[c] -> h2o[c] + nadp[c] + ugmr[c]	Rv3818	Membrane Metabolism
UAPGR	UDP N acetylenolpyruvoylglucosamine reductase	h[c] + nadph[c] + uaccg[c] -> nadp[c] + uamr[c]	Rv0482	Sugar Metabolism
UDCPDP	undecaprenyl diphosphatase	h2o[c] + udcpdp[c] -> h[c] + pi[c] + udcpp[c]	Rv2136c	Cofactor Metabolism
UDCPDPS	Undecaprenyl diphosphate synthase	frdp[c] + 8 ipdp[c] -> 8 ppi[c] + udcpdp[c]		Cofactor Metabolism
UDPDPS	undecaprenyl diphosphate synthase	decdp[c] + ipdp[c] -> ppi[c] + udcpdp[c]	Rv2361c	Polyprenyl Metabolism
UDPDPS2	undecaprenyl diphosphate synthase	decdp-tb[c] + ipdp[c] -> ppi[c] + udcpdp[c]	Rv2361c	Polyprenyl Metabolism
UDPG4E	UDPglucose 4 epimerase	udpg[c] <=> udpgal[c]	Rv0501 Rv0536 Rv3634c Rv0806c	Nucleotide Sugar Metabolism
UDPGALM	UDPgalactopyranose mutase	udpgal[c] -> udpgalfur[c]	Rv3809c	Arabinogalactan Synthesis
UDPGD	UDPglucose 6 dehydrogenase	h2o[c] + 2 nad[c] + udpg[c] -> 3 h[c] + 2 nadh[c] + udpglcur[c]	Rv0322	Nucleotide Sugar Metabolism
UGAGDS	UDP N glycolylmuramoyl L alanyl D glutamyl meso 2 6 diaminopimelate synthetase	26dap-M[c] + atp[c] + ugmag[c] -> adp[c] + h[c] + pi[c] + uggmd[c]	Rv2158c	Peptidoglycan Metabolism
UGGPT3	UDP N glycolylglucosamine N acetylmuramyl pentapeptide pyrophosphoryl undecaprenol N acetylglucosamine transferase	uacgam[c] + ugggmda[c] -> h[c] + udp[c] + ugagmda[c]	Rv2153c	Peptidoglycan Metabolism
UGLDDS1	UDP N acetylmuramoyl L alanyl D glutamyl L lysyl D alanyl D alanine synthetase alpha glutamate	alaala[c] + atp[c] + uAgl[c] -> adp[c] + pi[c] + uAgla[c]	Rv2157c	Peptidoglycan Metabolism
UGLDDS2	UDP N acetylmuramoyl L alanyl D glutamyl L lysyl D alanyl D alanine synthetase gamma glutamate	alaala[c] + atp[c] + uGgl[c] -> adp[c] + pi[c] + uGgla[c]	Rv2157c	Peptidoglycan Metabolism
UGMAGS	UDP N glycolylmuramoyl L alanyl D glutamate synthetase	atp[c] + glu-D[c] + ugma[c] -> adp[c] + h[c] + pi[c] + ugmag[c]	Rv2155c	Peptidoglycan Metabolism
UGMAS	UDP N glycolylmuramoyl L alanine synthetase	ala-L[c] + atp[c] + ugmr[c] -> adp[c] + h[c] + pi[c] + ugma[c]	Rv2152c	Peptidoglycan Metabolism
UGMDDS	UDP N acetylmuramoyl L alanyl D glutamyl meso 2 6 diaminopimeloyl D alanyl D alanine synthetase	alaala[c] + atp[c] + ugmd[c] -> adp[c] + h[c] + pi[c] + ugmda[c]	Rv2157c	Peptidoglycan Metabolism
UGMDDS2	UDP N glycolylmuramoyl L alanyl D glutamyl meso 2 6 diaminopimeloyl D alanyl D alanine synthetase	alaala[c] + atp[c] + uggmd[c] -> adp[c] + h[c] + pi[c] + uggmda[c]	Rv2157c	Peptidoglycan Metabolism
UMPK	UMP kinase	atp[c] + ump[c] <=> adp[c] + udp[c]	Rv1712 Rv2883c	Pyrimidine Metabolism
UPP3MT	uroporphyrinogen methyltransferase	2 amet[c] + uppg3[c] -> 2 ahcys[c] + dscl[c] + h[c]	Rv2847c	Porphyrin Metabolism
UPP3S	uroporphyrinogen III synthase	hmbil[c] -> h2o[c] + uppg3[c]	Rv0511 Rv0260c	Porphyrin Metabolism
UPPDC1	uroporphyrinogen decarboxylase uroporphyrinogen III	4 h[c] + uppg3[c] -> 4 co2[c] + cpppg3[c]	Rv2678c	Porphyrin Metabolism
UPPDC2	uroporphyrinogen decarboxylase uroporphyrinogen I	4 h[c] + uppg1[c] -> 4 co2[c] + cpppg1[c]	Rv2678c	Porphyrin Metabolism
UPPRT	uracil phosphoribosyltransferase	prpp[c] + ura[c] -> ppi[c] + ump[c]	Rv1379 Rv3309c	Pyrimidine Metabolism
UREA	urease	h2o[c] + 2 h[c] + urea[c] -> co2[c] + 2 nh4[c]	Rv1848 Rv1849 Rv1850	Purine Metabolism
URIDK1	uridylate kinase UMP	atp[c] + ump[c] -> adp[c] + udp[c]	Rv2883c	Nucleotide Sugar Metabolism
URIDK2r	uridylate kinase dUMP	atp[c] + dump[c] <=> adp[c] + dudp[c]		Pyrimidine Metabolism
URIK2	uridine kinase GTPUridine	gtp[c] + uri[c] -> gdp[c] + h[c] + ump[c]		Pyrimidine Metabolism
VALTA	valine transaminase	akg[c] + val-L[c] <=> 3mob[c] + glu-L[c]	Rv2210c	Valine Leucine and Isoleucine Metabolism
VALt2r	L valine reversible transport via proton symport	h[e] + val-L[e] <=> h[c] + val-L[c]		Transport
XPPT	xanthine phosphoribosyltransferase	prpp[c] + xan[c] -> ppi[c] + xmp[c]		Nucleotide Sugar Metabolism
XYLK	xylulokinase	atp[c] + xylu-D[c] -> adp[c] + h[c] + xu5p-D[c]	Rv0729	Sugar Metabolism
XYLabc	D xylose transport via ABC system	atp[c] + h2o[c] + xyl-D[e] -> adp[c] + h[c] + pi[c] + xyl-D[c]	Rv1236 Rv1237 Rv1238 Rv0498	Transport
YUMPS	yUMP synthetase	r5p[c] + ura[c] <=> h2o[c] + psd5p[c]	Rv1711 Rv1540 Rv2793c Rv3300c Rv3455c	Pyrimidine Metabolism
S7PI	Sedoheptulose 7 phosphate isomerase	s7p[c] -> gmhep7p[c]	Rv0113	Membrane Metabolism
AH7PK	D alpha D Heptose 7 phosphate kinase	gmhep7p[c] + atp[c] -> gmhep17bp[c] + adp[c]	Rv0115	Membrane Metabolism
BH7PK	D beta D Heptose 7 phosphate kinase	gmhep7p[c] + atp[c] -> gbmh17p-D[c] + adp[c]		Membrane Metabolism
ABH17BPP_a	D alpha beta D Heptose 1 7 bisphosphate phosphatase	gmhep17bp[c] + h2o[c] -> gmhep1p[c] + pi[c]	Rv0114	Membrane Metabolism
ABH17BPP_b	D alpha beta D Heptose 1 7 bisphosphate phosphatase	gmhep17bp[c] + h2o[c] -> gbmh1p-D[c] + pi[c]	Rv0114	Membrane Metabolism
MAN1PT3	D alpha D Heptose 1 phosphate guanylyltransferase	gmhep1p[c] + gtp[c] -> gamgdp-D[c] + ppi[c]	Rv3264c	Membrane Metabolism
H1PAT_b	D beta D Heptose 1 phosphate adenylyltransferase	gbmh1p-D[c] + atp[c] -> adphep-DD[c] + ppi[c]		Membrane Metabolism
HEADP_b	ADP D beta D heptose epimerase	adphep-DD[c] + nadp[c] + h[c] -> adphep-LD[c] + nadph[c]		Membrane Metabolism
UCBL	Urea Carboxylase	urea[c] + atp[c] + hco3[c] + h[c] <=> u1c[c] + adp[c] + pi[c]	Rv0263c	Urea Cycle
AHDL	Allophanate Hydrolase	u1c[c] + h2o[c] -> 2 co2[c] + 2 nh3[c]	Rv0264c	Urea Cycle
HMEDS	E 4 hydroxy 3 methylbut 2 enyl diphosphate synthase	2mecdp[c] + 2 fdxrd[c] -> hmbpp[c] + h2o[c] + 2 fdxox[c]	Rv2868c	Polyprenyl Metabolism
HMEDR	E 4 hydroxy 3 methylbut 2 en 1 yl diphosphate reductase	hmbpp[c] + nadh[c] + h[c] -> dmpp[c] + nad[c] + h2o[c]	Rv1110 Rv3382c	Polyprenyl Metabolism
HMEDR	E 4 hydroxy 3 methylbut 2 en 1 yl diphosphate reductase	hmbpp[c] + nadh[c] + h[c] -> ipdp[c] + nad[c] + h2o[c]	Rv1110 Rv3382c	Polyprenyl Metabolism
FRTT	Farnesyltranstransferase	frdp[c] + ipdp[c] + 3 h[c] -> ggdp[c] + ppi[c]	Rv3398c	Polyprenyl Metabolism
UCE_1	Uncharacterized Enzyme	ggdp[c] + ipdp[c] + 3 h[c] -> ptdp[c] + ppi[c]		Polyprenyl Metabolism
PRTT	Trans Pentaprenyltrantransferase	ptdp[c] + ipdp[c] + 3 h[c] -> hpdp[c] + ppi[c]		Polyprenyl Metabolism
HTPS	Heptaprenyl pyrophosphate synthase	hpdp[c] + ipdp[c] + 3 h[c] -> htdp[c] + ppi[c]	Rv0562 Rv0989c	Polyprenyl Metabolism
PPPGP	Guanosine Pentaphosphatase	gdptp[c] + h2o[c] + 5 h[c] -> gdpdp[c] + pi[c]	Rv1026 Rv0496	Purine Metabolism
PPGPP	PPGPP-3-pyrophosphohydrolase	gdpdp[c] + h2o[c] -> gdp[c] + ppi[c]		Purine Metabolism
2MCD	2 Methylcitrate dehydratase	2mcit[c] -> 2mcacn[c] + h2o[c]	Rv1130 Rv0392c Rv1812c Rv1854c	Propanoate Metabolism
2MCS	2 Methylcitrate synthase	oaa[c] + ppcoa[c] + h2o[c] -> 2mcit[c] + coa[c] + h[c]	Rv1131	Propanoate Metabolism
2MID	2 Methylisocitrate dehydratase	2mcacn[c] + h2o[c] -> micit[c]	Rv1475c	Propanoate Metabolism
2MIL	2 Methylisocitrate lyase	micit[c] -> pyr[c] + succ[c]	Rv0467	Propanoate Metabolism
ADPRDP	ADP ribose diphosphatase	adprib[c] + h2o[c] -> amp[c] + r5p[c]	Rv1700	Purine Metabolism
Gln_LT	Glutamine transport	gln-L[e] + atp[e] + h2o[e] -> gln[c] + adp[c] + pi[c]	Rv0072 Rv0073 Rv0411c Rv2564	Transport
EX_Gln[e]	Glutamine exchange	gln[e] <=>		Exchange
TREP	Trehalose phosphorylase	tre[c] + pi[c] -> glc-D[c] + g1p[c]	Rv3401	Sugar Metabolism
HDECH	HDEC hydrolase	1hdecg3p[c] + h2o[c] <=> glyc3p[c] + hdcea[c] + 3 h[c]		Fatty Acid Metabolism
DTBTST	Dethiobiotin: sulfur sulfur transferase	dtbt[c] + 2 amet[c] + s[c] -> 2 met-L[c] + 2 dad-5[c] + btn[c]	Rv1589 Rv2218	Biotin Metabolism
IPDPUDCT	IPDP undecaprenylcistransferase	7 ipdp[c] + ggdp[c] -> udcpdp[c] + 7 ppi[c]	Rv2361c	Polyprenyl Metabolism
ACHMSSH	O-acetylhomoserine (thiol)-lyase	h2s[c] + achms[c] -> ac[c] + h[c] + hcys-L[c]	Rv3340	Methionine Metabolism
CYRDAR	Cob II yrinic acid a c diamide reductase	2 co2dam[c] + fmnh2[c] -> 2 co1dam[c] + 2 h[c] + fmn[c]		Cofactor Metabolism
PDBL_1	Pyridoxal biosynthesis lyase-1	ru5p-D[c] + gln-L[c] + g3p[c] -> pydx5p[c] + glu-L[c] + pi[c] + h[c] + 3 h2o[c]	Rv2604c Rv2606c	Cofactor Metabolism
PDBL_2	Pyridoxal biosynthesis lyase-2	r5p-D[c] + gln-L[c] + g3p[c] -> pydx5p[c] + glu-L[c] + pi[c] + h[c] + 3 h2o[c]	Rv2604c Rv2606c	Cofactor Metabolism
PDBL_3	Pyridoxal biosynthesis lyase-3	ru5p-D[c] + gln-L[c] + dhap[c] -> pydx5p[c] + glu-L[c] + pi[c] + h[c] + 3 h2o[c]	Rv2604c Rv2606c	Cofactor Metabolism
PDBL_4	Pyridoxal biosynthesis lyase-4	r5p-D[c] + gln-L[c] + dhap[c] -> pydx5p[c] + glu-L[c] + pi[c] + h[c] + 3 h2o[c]	Rv2604c Rv2606c	Cofactor Metabolism
EX_ni2(e)	Ni exchange	ni2[e] <=>		Exchange
Ni2t	Ni/Co transport	ni2[e] <=> ni2[c]	Rv2856	Transport
EX_mn2(e)	Mn exchange	mn2[e] <=>		Exchange
Mn2t	Mn/Fe transport	mn2[e] <=> mn2[c]	Rv0924c	Transport
2O4EH	2-oxopent-4-enoate hydratase	2h24pdn[c] + h2o[c] -> 4h2opntn[c]	Rv3536c	Pyruvate Metabolism
EX_mo(e)	Mo exchange	mob[e] <=>		Exchange
Mot	Mo transport	mob[e] + atp[c] + h2o[c] <=> mob[c] + adp[c] + pi[c]	Rv1857 Rv1858 Rv1859	Transport
G6PDH	glucose 6 phosphate dehydrogenase	g6p[c] + f420-2[c] -> 6pgl[c] + f420-2h2[c]	Rv0407 Rv0132c	Pentose Phosphate Pathway
2PLS	2-phospho-L-lactate synthase	lac-L[c] + gtp[c] -> 2plac-L[c] + gdp[c] + h[c]		Cofactor F420 Biosynthesis
LPPGS	LPPG synthetase	2plac-L[c] + gtp[c] + h[c] -> lppg[c] + ppi[c]		Cofactor F420 Biosynthesis
DMHDRFS	7,8-didemethyl-8-hydroxy-5-deazariboflavin synthetase	5a6rac[c] + 34hpp[c] + h2o[c] + 2 amet[c] -> fo[c] + 2 dad-5[c] + 2 met-L[c] + nh4[c] + 2 h[c]	Rv1173	Cofactor F420 Biosynthesis
LPFPLT	LPPG:Fo 2-phospho-L-lactate transferase	lppg[c] + fo[c] -> f420-0[c] + gmp[c] + h[c]	Rv3261 Rv3262	Cofactor F420 Biosynthesis
GF4GL_0	gamma-F420-0:gamma-L-glutamate ligase	f420-0[c] + glu-L[c] + gtp[c] -> f420-1[c] + h[c] + gdp[c] + pi[c]	Rv3261 Rv3262	Cofactor F420 Biosynthesis
GF4GL_1	gamma-F420-1:gamma-L-glutamate ligase	f420-1[c] + glu-L[c] + gtp[c] -> f420-2[c] + h[c] + gdp[c] + pi[c]	Rv3261 Rv3262	Cofactor F420 Biosynthesis
GF4GL_2	gamma-F420-2:gamma-L-glutamate ligase	f420-2[c] + glu-L[c] + gtp[c] -> f420-3[c] + h[c] + gdp[c] + pi[c]	Rv3261 Rv3262	Cofactor F420 Biosynthesis
GF4GL_3	gamma-F420-3:gamma-L-glutamate ligase	f420-3[c] + glu-L[c] + gtp[c] -> f420-4[c] + h[c] + gdp[c] + pi[c]	Rv3261 Rv3262	Cofactor F420 Biosynthesis
GF4GL_4	gamma-F420-4:gamma-L-glutamate ligase	f420-4[c] + glu-L[c] + gtp[c] -> f420-5[c] + h[c] + gdp[c] + pi[c]	Rv3261 Rv3262	Cofactor F420 Biosynthesis
MBP_1	Molybdopterin biosynthesis protein-1	gtp[c] + h2o[c] -> cpmp[c] + ppi[c]	Rv0864 Rv0869 Rv3109 Rv3111	Molybdopertin cofactor biosynthesis
MPTSS	MPT synthase sulfurylase	MoaD[c] + atp[c] -> MoaD-AMP[c] + ppi[c]	Rv0868c Rv3112	Molybdopertin cofactor biosynthesis
MBP_2	Molybdopterin biosynthesis protein-2	MoaD-AMP[c] + cys-L[c] -> MoaD-SH[c] + ala-L[c]		Molybdopertin cofactor biosynthesis
MODBS	Molybdopterin synthase	cpmp[c] + 2 MoaD-SH[c] -> mobpt[c] + 2 h2o[c] + 2 MoaD[c]	Rv0866 Rv3119 Rv3323c	Molybdopertin cofactor biosynthesis
MODAT	Molybdopterin adenylyltransferase	mobpt[c] + atp[c] + h2[c] -> mobptamp[c] + ppi[c]	Rv0865	Molybdopertin cofactor biosynthesis
MOCO	Molybdenum-molybdopterin ligase	mobptamp[c] + mob[c] -> moco[c] + amp[c] + h2o[c]	Rv0994	Molybdopertin cofactor biosynthesis
MGDS	Molybdopterin-guanine dinucleotide biosynthesis protein	moco[c] + gtp[c] + 3 h[c] -> mgd[c] + ppi[c]	Rv2453c	Molybdopertin cofactor biosynthesis
FAD_1	acyl-CoA dehydrogenase fadE1-36 AND enoyl-CoA hydratase/isomerase echA1-21 AND 3-hydroxyacyl-CoA dehydrogenase fadB2-5 AND acetyl-CoA C-acetyltransferase fadA2-6	octscoa[c] + fad[c] + nad[c] + coa[c] -> hexscoa[c] + fadh2[c] + nadh[c] + accoa[c]	Rv0131c Rv0154c Rv0215c Rv0231 Rv0244c Rv0271c Rv0400c Rv0752c Rv0873 Rv0972c Rv0975c Rv1346 Rv1467c Rv1679 Rv1933c Rv1934c Rv2724c Rv2789c Rv3061c Rv3139 Rv3140 Rv3274c Rv3504 Rv3505 Rv3543c Rv3544c Rv3560c Rv3562 Rv3563 Rv3564 Rv3573c Rv3761c Rv3797 Rv0672 Rv2500c Rv0222 Rv0456c Rv0632c Rv0673 Rv0675 Rv0971c Rv1070c Rv1071c Rv1141c Rv1142c Rv1472 Rv1935c Rv2486 Rv2679 Rv2831 Rv3039c Rv3516 Rv35…	Beta oxidation of fatty acids
FAD_2	acyl-CoA dehydrogenase fadE1-36 AND enoyl-CoA hydratase/isomerase echA1-21 AND 3-hydroxyacyl-CoA dehydrogenase fadB2-5 AND acetyl-CoA C-acetyltransferase fadA2-7	hexscoa[c] + fad[c] + nad[c] + coa[c] -> tetscoa[c] + fadh2[c] + nadh[c] + accoa[c]	Rv0131c Rv0154c Rv0215c Rv0231 Rv0244c Rv0271c Rv0400c Rv0752c Rv0873 Rv0972c Rv0975c Rv1346 Rv1467c Rv1679 Rv1933c Rv1934c Rv2724c Rv2789c Rv3061c Rv3139 Rv3140 Rv3274c Rv3504 Rv3505 Rv3543c Rv3544c Rv3560c Rv3562 Rv3563 Rv3564 Rv3573c Rv3761c Rv3797 Rv0672 Rv2500c Rv0222 Rv0456c Rv0632c Rv0673 Rv0675 Rv0971c Rv1070c Rv1071c Rv1141c Rv1142c Rv1472 Rv1935c Rv2486 Rv2679 Rv2831 Rv3039c Rv3516 Rv35…	Beta oxidation of fatty acids
FAD_3	acyl-CoA dehydrogenase fadE1-36 AND enoyl-CoA hydratase/isomerase echA1-21 AND 3-hydroxyacyl-CoA dehydrogenase fadB2-5 AND acetyl-CoA C-acetyltransferase fadA2-8	tetscoa[c] + fad[c] + nad[c] + coa[c] -> doscoa[c] + fadh2[c] + nadh[c] + accoa[c]	Rv0131c Rv0154c Rv0215c Rv0231 Rv0244c Rv0271c Rv0400c Rv0752c Rv0873 Rv0972c Rv0975c Rv1346 Rv1467c Rv1679 Rv1933c Rv1934c Rv2724c Rv2789c Rv3061c Rv3139 Rv3140 Rv3274c Rv3504 Rv3505 Rv3543c Rv3544c Rv3560c Rv3562 Rv3563 Rv3564 Rv3573c Rv3761c Rv3797 Rv0672 Rv2500c Rv0222 Rv0456c Rv0632c Rv0673 Rv0675 Rv0971c Rv1070c Rv1071c Rv1141c Rv1142c Rv1472 Rv1935c Rv2486 Rv2679 Rv2831 Rv3039c Rv3516 Rv35…	Beta oxidation of fatty acids
FAD_4	acyl-CoA dehydrogenase fadE1-36 AND enoyl-CoA hydratase/isomerase echA1-21 AND 3-hydroxyacyl-CoA dehydrogenase fadB2-5 AND acetyl-CoA C-acetyltransferase fadA2-9	doscoa[c] + fad[c] + nad[c] + coa[c] -> eiscoa[c] + fadh2[c] + nadh[c] + accoa[c]	Rv0131c Rv0154c Rv0215c Rv0231 Rv0244c Rv0271c Rv0400c Rv0752c Rv0873 Rv0972c Rv0975c Rv1346 Rv1467c Rv1679 Rv1933c Rv1934c Rv2724c Rv2789c Rv3061c Rv3139 Rv3140 Rv3274c Rv3504 Rv3505 Rv3543c Rv3544c Rv3560c Rv3562 Rv3563 Rv3564 Rv3573c Rv3761c Rv3797 Rv0672 Rv2500c Rv0222 Rv0456c Rv0632c Rv0673 Rv0675 Rv0971c Rv1070c Rv1071c Rv1141c Rv1142c Rv1472 Rv1935c Rv2486 Rv2679 Rv2831 Rv3039c Rv3516 Rv35…	Beta oxidation of fatty acids
FAD_5	acyl-CoA dehydrogenase fadE1-36 AND enoyl-CoA hydratase/isomerase echA1-21 AND 3-hydroxyacyl-CoA dehydrogenase fadB2-5 AND acetyl-CoA C-acetyltransferase fadA2-10	eiscoa[c] + fad[c] + nad[c] + coa[c] -> octdcoa[c] + fadh2[c] + nadh[c] + accoa[c]	Rv0131c Rv0154c Rv0215c Rv0231 Rv0244c Rv0271c Rv0400c Rv0752c Rv0873 Rv0972c Rv0975c Rv1346 Rv1467c Rv1679 Rv1933c Rv1934c Rv2724c Rv2789c Rv3061c Rv3139 Rv3140 Rv3274c Rv3504 Rv3505 Rv3543c Rv3544c Rv3560c Rv3562 Rv3563 Rv3564 Rv3573c Rv3761c Rv3797 Rv0672 Rv2500c Rv0222 Rv0456c Rv0632c Rv0673 Rv0675 Rv0971c Rv1070c Rv1071c Rv1141c Rv1142c Rv1472 Rv1935c Rv2486 Rv2679 Rv2831 Rv3039c Rv3516 Rv35…	Beta oxidation of fatty acids
FAD_6	acyl-CoA dehydrogenase fadE1-36 AND enoyl-CoA hydratase/isomerase echA1-21 AND 3-hydroxyacyl-CoA dehydrogenase fadB2-5 AND acetyl-CoA C-acetyltransferase fadA2-11	octdcoa[c] + fad[c] + nad[c] + coa[c] -> hexdcoa[c] + fadh2[c] + nadh[c] + accoa[c]	Rv0131c Rv0154c Rv0215c Rv0231 Rv0244c Rv0271c Rv0400c Rv0752c Rv0873 Rv0972c Rv0975c Rv1346 Rv1467c Rv1679 Rv1933c Rv1934c Rv2724c Rv2789c Rv3061c Rv3139 Rv3140 Rv3274c Rv3504 Rv3505 Rv3543c Rv3544c Rv3560c Rv3562 Rv3563 Rv3564 Rv3573c Rv3761c Rv3797 Rv0672 Rv2500c Rv0222 Rv0456c Rv0632c Rv0673 Rv0675 Rv0971c Rv1070c Rv1071c Rv1141c Rv1142c Rv1472 Rv1935c Rv2486 Rv2679 Rv2831 Rv3039c Rv3516 Rv35…	Beta oxidation of fatty acids
FAD_7	acyl-CoA dehydrogenase fadE1-36 AND enoyl-CoA hydratase/isomerase echA1-21 AND 3-hydroxyacyl-CoA dehydrogenase fadB2-5 AND acetyl-CoA C-acetyltransferase fadA2-12	hexdcoa[c] + fad[c] + nad[c] + coa[c] -> tdcoa[c] + fadh2[c] + nadh[c] + accoa[c]	Rv0131c Rv0154c Rv0215c Rv0231 Rv0244c Rv0271c Rv0400c Rv0752c Rv0873 Rv0972c Rv0975c Rv1346 Rv1467c Rv1679 Rv1933c Rv1934c Rv2724c Rv2789c Rv3061c Rv3139 Rv3140 Rv3274c Rv3504 Rv3505 Rv3543c Rv3544c Rv3560c Rv3562 Rv3563 Rv3564 Rv3573c Rv3761c Rv3797 Rv0672 Rv2500c Rv0222 Rv0456c Rv0632c Rv0673 Rv0675 Rv0971c Rv1070c Rv1071c Rv1141c Rv1142c Rv1472 Rv1935c Rv2486 Rv2679 Rv2831 Rv3039c Rv3516 Rv35…	Beta oxidation of fatty acids
FAD_8	acyl-CoA dehydrogenase fadE1-36 AND enoyl-CoA hydratase/isomerase echA1-21 AND 3-hydroxyacyl-CoA dehydrogenase fadB2-5 AND acetyl-CoA C-acetyltransferase fadA2-13	tdcoa[c] + fad[c] + nad[c] + coa[c] -> dodcoa[c] + fadh2[c] + nadh[c] + accoa[c]	Rv0131c Rv0154c Rv0215c Rv0231 Rv0244c Rv0271c Rv0400c Rv0752c Rv0873 Rv0972c Rv0975c Rv1346 Rv1467c Rv1679 Rv1933c Rv1934c Rv2724c Rv2789c Rv3061c Rv3139 Rv3140 Rv3274c Rv3504 Rv3505 Rv3543c Rv3544c Rv3560c Rv3562 Rv3563 Rv3564 Rv3573c Rv3761c Rv3797 Rv0672 Rv2500c Rv0222 Rv0456c Rv0632c Rv0673 Rv0675 Rv0971c Rv1070c Rv1071c Rv1141c Rv1142c Rv1472 Rv1935c Rv2486 Rv2679 Rv2831 Rv3039c Rv3516 Rv35…	Beta oxidation of fatty acids
FAD_9	acyl-CoA dehydrogenase fadE1-36 AND enoyl-CoA hydratase/isomerase echA1-21 AND 3-hydroxyacyl-CoA dehydrogenase fadB2-5 AND acetyl-CoA C-acetyltransferase fadA2-14	dodcoa[c] + fad[c] + nad[c] + coa[c] -> decoa[c] + fadh2[c] + nadh[c] + accoa[c]	Rv0131c Rv0154c Rv0215c Rv0231 Rv0244c Rv0271c Rv0400c Rv0752c Rv0873 Rv0972c Rv0975c Rv1346 Rv1467c Rv1679 Rv1933c Rv1934c Rv2724c Rv2789c Rv3061c Rv3139 Rv3140 Rv3274c Rv3504 Rv3505 Rv3543c Rv3544c Rv3560c Rv3562 Rv3563 Rv3564 Rv3573c Rv3761c Rv3797 Rv0672 Rv2500c Rv0222 Rv0456c Rv0632c Rv0673 Rv0675 Rv0971c Rv1070c Rv1071c Rv1141c Rv1142c Rv1472 Rv1935c Rv2486 Rv2679 Rv2831 Rv3039c Rv3516 Rv35…	Beta oxidation of fatty acids
FAD_10	acyl-CoA dehydrogenase fadE1-36 AND enoyl-CoA hydratase/isomerase echA1-21 AND 3-hydroxyacyl-CoA dehydrogenase fadB2-5 AND acetyl-CoA C-acetyltransferase fadA2-15	decoa[c] + fad[c] + nad[c] + coa[c] -> occoa[c] + fadh2[c] + nadh[c] + accoa[c]	Rv0131c Rv0154c Rv0215c Rv0231 Rv0244c Rv0271c Rv0400c Rv0752c Rv0873 Rv0972c Rv0975c Rv1346 Rv1467c Rv1679 Rv1933c Rv1934c Rv2724c Rv2789c Rv3061c Rv3139 Rv3140 Rv3274c Rv3504 Rv3505 Rv3543c Rv3544c Rv3560c Rv3562 Rv3563 Rv3564 Rv3573c Rv3761c Rv3797 Rv0672 Rv2500c Rv0222 Rv0456c Rv0632c Rv0673 Rv0675 Rv0971c Rv1070c Rv1071c Rv1141c Rv1142c Rv1472 Rv1935c Rv2486 Rv2679 Rv2831 Rv3039c Rv3516 Rv35…	Beta oxidation of fatty acids
FAD_11	acyl-CoA dehydrogenase fadE1-36 AND enoyl-CoA hydratase/isomerase echA1-21 AND 3-hydroxyacyl-CoA dehydrogenase fadB2-5 AND acetyl-CoA C-acetyltransferase fadA2-16	occoa[c] + fad[c] + nad[c] + coa[c] -> hexcoa[c] + fadh2[c] + nadh[c] + accoa[c]	Rv0131c Rv0154c Rv0215c Rv0231 Rv0244c Rv0271c Rv0400c Rv0752c Rv0873 Rv0972c Rv0975c Rv1346 Rv1467c Rv1679 Rv1933c Rv1934c Rv2724c Rv2789c Rv3061c Rv3139 Rv3140 Rv3274c Rv3504 Rv3505 Rv3543c Rv3544c Rv3560c Rv3562 Rv3563 Rv3564 Rv3573c Rv3761c Rv3797 Rv0672 Rv2500c Rv0222 Rv0456c Rv0632c Rv0673 Rv0675 Rv0971c Rv1070c Rv1071c Rv1141c Rv1142c Rv1472 Rv1935c Rv2486 Rv2679 Rv2831 Rv3039c Rv3516 Rv35…	Beta oxidation of fatty acids
FAD_12	acyl-CoA dehydrogenase fadE1-36 AND enoyl-CoA hydratase/isomerase echA1-21 AND 3-hydroxyacyl-CoA dehydrogenase fadB2-5 AND acetyl-CoA C-acetyltransferase fadA2-17	hexcoa[c] + fad[c] + nad[c] + coa[c] -> butcoa[c] + fadh2[c] + nadh[c] + accoa[c]	Rv0131c Rv0154c Rv0215c Rv0231 Rv0244c Rv0271c Rv0400c Rv0752c Rv0873 Rv0972c Rv0975c Rv1346 Rv1467c Rv1679 Rv1933c Rv1934c Rv2724c Rv2789c Rv3061c Rv3139 Rv3140 Rv3274c Rv3504 Rv3505 Rv3543c Rv3544c Rv3560c Rv3562 Rv3563 Rv3564 Rv3573c Rv3761c Rv3797 Rv0672 Rv2500c Rv0222 Rv0456c Rv0632c Rv0673 Rv0675 Rv0971c Rv1070c Rv1071c Rv1141c Rv1142c Rv1472 Rv1935c Rv2486 Rv2679 Rv2831 Rv3039c Rv3516 Rv35…	Beta oxidation of fatty acids
FAD_13	acyl-CoA dehydrogenase fadE1-36 AND enoyl-CoA hydratase/isomerase echA1-21 AND 3-hydroxyacyl-CoA dehydrogenase fadB2-5 AND acetyl-CoA C-acetyltransferase fadA2-18	butcoa[c] + fad[c] + nad[c] + coa[c] -> fadh2[c] + nadh[c] + 2 accoa[c]	Rv0131c Rv0154c Rv0215c Rv0231 Rv0244c Rv0271c Rv0400c Rv0752c Rv0873 Rv0972c Rv0975c Rv1346 Rv1467c Rv1679 Rv1933c Rv1934c Rv2724c Rv2789c Rv3061c Rv3139 Rv3140 Rv3274c Rv3504 Rv3505 Rv3543c Rv3544c Rv3560c Rv3562 Rv3563 Rv3564 Rv3573c Rv3761c Rv3797 Rv0672 Rv2500c Rv0222 Rv0456c Rv0632c Rv0673 Rv0675 Rv0971c Rv1070c Rv1071c Rv1141c Rv1142c Rv1472 Rv1935c Rv2486 Rv2679 Rv2831 Rv3039c Rv3516 Rv35…	Beta oxidation of fatty acids
FAD_14	acyl-CoA dehydrogenase fadE1-36 AND enoyl-CoA hydratase/isomerase echA1-21 AND 3-hydroxyacyl-CoA dehydrogenase fadB2-5 AND acetyl-CoA C-acetyltransferase fadA2-19	odecoa[c] + fad[c] + nad[c] + coa[c] -> hdcoa[c] + fadh2[c] + nadh[c] + accoa[c]	Rv0131c Rv0154c Rv0215c Rv0231 Rv0244c Rv0271c Rv0400c Rv0752c Rv0873 Rv0972c Rv0975c Rv1346 Rv1467c Rv1679 Rv1933c Rv1934c Rv2724c Rv2789c Rv3061c Rv3139 Rv3140 Rv3274c Rv3504 Rv3505 Rv3543c Rv3544c Rv3560c Rv3562 Rv3563 Rv3564 Rv3573c Rv3761c Rv3797 Rv0672 Rv2500c Rv0222 Rv0456c Rv0632c Rv0673 Rv0675 Rv0971c Rv1070c Rv1071c Rv1141c Rv1142c Rv1472 Rv1935c Rv2486 Rv2679 Rv2831 Rv3039c Rv3516 Rv35…	Beta oxidation of unsaturated fatty acids
FAD_15	acyl-CoA dehydrogenase fadE1-36 AND enoyl-CoA hydratase/isomerase echA1-21 AND 3-hydroxyacyl-CoA dehydrogenase fadB2-5 AND acetyl-CoA C-acetyltransferase fadA2-20	hdcoa[c] + fad[c] + nad[c] + coa[c] -> c5tetdcoa[c] + fadh2[c] + nadh[c] + accoa[c]	Rv0131c Rv0154c Rv0215c Rv0231 Rv0244c Rv0271c Rv0400c Rv0752c Rv0873 Rv0972c Rv0975c Rv1346 Rv1467c Rv1679 Rv1933c Rv1934c Rv2724c Rv2789c Rv3061c Rv3139 Rv3140 Rv3274c Rv3504 Rv3505 Rv3543c Rv3544c Rv3560c Rv3562 Rv3563 Rv3564 Rv3573c Rv3761c Rv3797 Rv0672 Rv2500c Rv0222 Rv0456c Rv0632c Rv0673 Rv0675 Rv0971c Rv1070c Rv1071c Rv1141c Rv1142c Rv1472 Rv1935c Rv2486 Rv2679 Rv2831 Rv3039c Rv3516 Rv35…	Beta oxidation of unsaturated fatty acids
FAD_16	acyl-CoA dehydrogenase fadE1-36 AND enoyl-CoA hydratase/isomerase echA1-21 AND 3-hydroxyacyl-CoA dehydrogenase fadB2-5 AND acetyl-CoA C-acetyltransferase fadA2-21	c5tetdcoa[c] + fad[c] + nad[c] + coa[c] -> c3dodcoa[c] + fadh2[c] + nadh[c] + accoa[c]	Rv0131c Rv0154c Rv0215c Rv0231 Rv0244c Rv0271c Rv0400c Rv0752c Rv0873 Rv0972c Rv0975c Rv1346 Rv1467c Rv1679 Rv1933c Rv1934c Rv2724c Rv2789c Rv3061c Rv3139 Rv3140 Rv3274c Rv3504 Rv3505 Rv3543c Rv3544c Rv3560c Rv3562 Rv3563 Rv3564 Rv3573c Rv3761c Rv3797 Rv0672 Rv2500c Rv0222 Rv0456c Rv0632c Rv0673 Rv0675 Rv0971c Rv1070c Rv1071c Rv1141c Rv1142c Rv1472 Rv1935c Rv2486 Rv2679 Rv2831 Rv3039c Rv3516 Rv35…	Beta oxidation of unsaturated fatty acids
FAD_17	acyl-CoA dehydrogenase fadE1-36 AND enoyl-CoA hydratase/isomerase echA1-21 AND 3-hydroxyacyl-CoA dehydrogenase fadB2-5 AND acetyl-CoA C-acetyltransferase fadA2-22	c3dodcoa[c] -> t2dodcoa[c]	Rv0131c Rv0154c Rv0215c Rv0231 Rv0244c Rv0271c Rv0400c Rv0752c Rv0873 Rv0972c Rv0975c Rv1346 Rv1467c Rv1679 Rv1933c Rv1934c Rv2724c Rv2789c Rv3061c Rv3139 Rv3140 Rv3274c Rv3504 Rv3505 Rv3543c Rv3544c Rv3560c Rv3562 Rv3563 Rv3564 Rv3573c Rv3761c Rv3797 Rv0672 Rv2500c Rv0222 Rv0456c Rv0632c Rv0673 Rv0675 Rv0971c Rv1070c Rv1071c Rv1141c Rv1142c Rv1472 Rv1935c Rv2486 Rv2679 Rv2831 Rv3039c Rv3516 Rv35…	Beta oxidation of unsaturated fatty acids
FAD_18	acyl-CoA dehydrogenase fadE1-36 AND enoyl-CoA hydratase/isomerase echA1-21 AND 3-hydroxyacyl-CoA dehydrogenase fadB2-5 AND acetyl-CoA C-acetyltransferase fadA2-23	t2dodcoa[c] -> d2hdodcoa[c]	Rv0131c Rv0154c Rv0215c Rv0231 Rv0244c Rv0271c Rv0400c Rv0752c Rv0873 Rv0972c Rv0975c Rv1346 Rv1467c Rv1679 Rv1933c Rv1934c Rv2724c Rv2789c Rv3061c Rv3139 Rv3140 Rv3274c Rv3504 Rv3505 Rv3543c Rv3544c Rv3560c Rv3562 Rv3563 Rv3564 Rv3573c Rv3761c Rv3797 Rv0672 Rv2500c Rv0222 Rv0456c Rv0632c Rv0673 Rv0675 Rv0971c Rv1070c Rv1071c Rv1141c Rv1142c Rv1472 Rv1935c Rv2486 Rv2679 Rv2831 Rv3039c Rv3516 Rv35…	Beta oxidation of unsaturated fatty acids
FAD_19	acyl-CoA dehydrogenase fadE1-36 AND enoyl-CoA hydratase/isomerase echA1-21 AND 3-hydroxyacyl-CoA dehydrogenase fadB2-5 AND acetyl-CoA C-acetyltransferase fadA2-24	d2hdodcoa[c] + nad[c] -> dodcoa[c] + nadh[c]	Rv0131c Rv0154c Rv0215c Rv0231 Rv0244c Rv0271c Rv0400c Rv0752c Rv0873 Rv0972c Rv0975c Rv1346 Rv1467c Rv1679 Rv1933c Rv1934c Rv2724c Rv2789c Rv3061c Rv3139 Rv3140 Rv3274c Rv3504 Rv3505 Rv3543c Rv3544c Rv3560c Rv3562 Rv3563 Rv3564 Rv3573c Rv3761c Rv3797 Rv0672 Rv2500c Rv0222 Rv0456c Rv0632c Rv0673 Rv0675 Rv0971c Rv1070c Rv1071c Rv1141c Rv1142c Rv1472 Rv1935c Rv2486 Rv2679 Rv2831 Rv3039c Rv3516 Rv35…	Beta oxidation of unsaturated fatty acids
FAD_20	acyl-CoA dehydrogenase fadE AND enoyl-CoA hydratase/isomerase echA AND 3-hydroxyacyl-CoA dehydrogenase fadB AND acetyl-CoA C-acetyltransferase fadA	nodcoa[c] + fad[c] + nad[c] + coa[c] -> hepdcoa[c] + fadh2[c] + nadh[c] + accoa[c]	Rv0131c Rv0154c Rv0215c Rv0231 Rv0244c Rv0271c Rv0400c Rv0752c Rv0873 Rv0972c Rv0975c Rv1346 Rv1467c Rv1679 Rv1933c Rv1934c Rv2724c Rv2789c Rv3061c Rv3139 Rv3140 Rv3274c Rv3504 Rv3505 Rv3543c Rv3544c Rv3560c Rv3562 Rv3563 Rv3564 Rv3573c Rv3761c Rv3797 Rv0672 Rv2500c Rv0222 Rv0456c Rv0632c Rv0673 Rv0675 Rv0971c Rv1070c Rv1071c Rv1141c Rv1142c Rv1472 Rv1935c Rv2486 Rv2679 Rv2831 Rv3039c Rv3516 Rv35…	Beta oxidation of odd-numbered acyl chain fatty acids
FAD_21	acyl-CoA dehydrogenase fadE AND enoyl-CoA hydratase/isomerase echA AND 3-hydroxyacyl-CoA dehydrogenase fadB AND acetyl-CoA C-acetyltransferase fadA	hepdcoa[c] + fad[c] + nad[c] + coa[c] -> pentdcoa[c] + fadh2[c] + nadh[c] + accoa[c]	Rv0131c Rv0154c Rv0215c Rv0231 Rv0244c Rv0271c Rv0400c Rv0752c Rv0873 Rv0972c Rv0975c Rv1346 Rv1467c Rv1679 Rv1933c Rv1934c Rv2724c Rv2789c Rv3061c Rv3139 Rv3140 Rv3274c Rv3504 Rv3505 Rv3543c Rv3544c Rv3560c Rv3562 Rv3563 Rv3564 Rv3573c Rv3761c Rv3797 Rv0672 Rv2500c Rv0222 Rv0456c Rv0632c Rv0673 Rv0675 Rv0971c Rv1070c Rv1071c Rv1141c Rv1142c Rv1472 Rv1935c Rv2486 Rv2679 Rv2831 Rv3039c Rv3516 Rv35…	Beta oxidation of odd-numbered acyl chain fatty acids
FAD_22	acyl-CoA dehydrogenase fadE AND enoyl-CoA hydratase/isomerase echA AND 3-hydroxyacyl-CoA dehydrogenase fadB AND acetyl-CoA C-acetyltransferase fadA	pentdcoa[c] + fad[c] + nad[c] + coa[c] -> tridcoa[c] + fadh2[c] + nadh[c] + accoa[c]	Rv0131c Rv0154c Rv0215c Rv0231 Rv0244c Rv0271c Rv0400c Rv0752c Rv0873 Rv0972c Rv0975c Rv1346 Rv1467c Rv1679 Rv1933c Rv1934c Rv2724c Rv2789c Rv3061c Rv3139 Rv3140 Rv3274c Rv3504 Rv3505 Rv3543c Rv3544c Rv3560c Rv3562 Rv3563 Rv3564 Rv3573c Rv3761c Rv3797 Rv0672 Rv2500c Rv0222 Rv0456c Rv0632c Rv0673 Rv0675 Rv0971c Rv1070c Rv1071c Rv1141c Rv1142c Rv1472 Rv1935c Rv2486 Rv2679 Rv2831 Rv3039c Rv3516 Rv35…	Beta oxidation of odd-numbered acyl chain fatty acids
FAD_23	acyl-CoA dehydrogenase fadE AND enoyl-CoA hydratase/isomerase echA AND 3-hydroxyacyl-CoA dehydrogenase fadB AND acetyl-CoA C-acetyltransferase fadA	tridcoa[c] + fad[c] + nad[c] + coa[c] -> undcoa[c] + fadh2[c] + nadh[c] + accoa[c]	Rv0131c Rv0154c Rv0215c Rv0231 Rv0244c Rv0271c Rv0400c Rv0752c Rv0873 Rv0972c Rv0975c Rv1346 Rv1467c Rv1679 Rv1933c Rv1934c Rv2724c Rv2789c Rv3061c Rv3139 Rv3140 Rv3274c Rv3504 Rv3505 Rv3543c Rv3544c Rv3560c Rv3562 Rv3563 Rv3564 Rv3573c Rv3761c Rv3797 Rv0672 Rv2500c Rv0222 Rv0456c Rv0632c Rv0673 Rv0675 Rv0971c Rv1070c Rv1071c Rv1141c Rv1142c Rv1472 Rv1935c Rv2486 Rv2679 Rv2831 Rv3039c Rv3516 Rv35…	Beta oxidation of odd-numbered acyl chain fatty acids
FAD_24	acyl-CoA dehydrogenase fadE AND enoyl-CoA hydratase/isomerase echA AND 3-hydroxyacyl-CoA dehydrogenase fadB AND acetyl-CoA C-acetyltransferase fadA	undcoa[c] + fad[c] + nad[c] + coa[c] -> nocoa[c] + fadh2[c] + nadh[c] + accoa[c]	Rv0131c Rv0154c Rv0215c Rv0231 Rv0244c Rv0271c Rv0400c Rv0752c Rv0873 Rv0972c Rv0975c Rv1346 Rv1467c Rv1679 Rv1933c Rv1934c Rv2724c Rv2789c Rv3061c Rv3139 Rv3140 Rv3274c Rv3504 Rv3505 Rv3543c Rv3544c Rv3560c Rv3562 Rv3563 Rv3564 Rv3573c Rv3761c Rv3797 Rv0672 Rv2500c Rv0222 Rv0456c Rv0632c Rv0673 Rv0675 Rv0971c Rv1070c Rv1071c Rv1141c Rv1142c Rv1472 Rv1935c Rv2486 Rv2679 Rv2831 Rv3039c Rv3516 Rv35…	Beta oxidation of odd-numbered acyl chain fatty acids
FAD_25	acyl-CoA dehydrogenase fadE AND enoyl-CoA hydratase/isomerase echA AND 3-hydroxyacyl-CoA dehydrogenase fadB AND acetyl-CoA C-acetyltransferase fadA	nocoa[c] + fad[c] + nad[c] + coa[c] -> hepcoa[c] + fadh2[c] + nadh[c] + accoa[c]	Rv0131c Rv0154c Rv0215c Rv0231 Rv0244c Rv0271c Rv0400c Rv0752c Rv0873 Rv0972c Rv0975c Rv1346 Rv1467c Rv1679 Rv1933c Rv1934c Rv2724c Rv2789c Rv3061c Rv3139 Rv3140 Rv3274c Rv3504 Rv3505 Rv3543c Rv3544c Rv3560c Rv3562 Rv3563 Rv3564 Rv3573c Rv3761c Rv3797 Rv0672 Rv2500c Rv0222 Rv0456c Rv0632c Rv0673 Rv0675 Rv0971c Rv1070c Rv1071c Rv1141c Rv1142c Rv1472 Rv1935c Rv2486 Rv2679 Rv2831 Rv3039c Rv3516 Rv35…	Beta oxidation of odd-numbered acyl chain fatty acids
FAD_26	acyl-CoA dehydrogenase fadE AND enoyl-CoA hydratase/isomerase echA AND 3-hydroxyacyl-CoA dehydrogenase fadB AND acetyl-CoA C-acetyltransferase fadA	hepcoa[c] + fad[c] + nad[c] + coa[c] -> pentcoa[c] + fadh2[c] + nadh[c] + accoa[c]	Rv0131c Rv0154c Rv0215c Rv0231 Rv0244c Rv0271c Rv0400c Rv0752c Rv0873 Rv0972c Rv0975c Rv1346 Rv1467c Rv1679 Rv1933c Rv1934c Rv2724c Rv2789c Rv3061c Rv3139 Rv3140 Rv3274c Rv3504 Rv3505 Rv3543c Rv3544c Rv3560c Rv3562 Rv3563 Rv3564 Rv3573c Rv3761c Rv3797 Rv0672 Rv2500c Rv0222 Rv0456c Rv0632c Rv0673 Rv0675 Rv0971c Rv1070c Rv1071c Rv1141c Rv1142c Rv1472 Rv1935c Rv2486 Rv2679 Rv2831 Rv3039c Rv3516 Rv35…	Beta oxidation of odd-numbered acyl chain fatty acids
FAD_27	acyl-CoA dehydrogenase fadE AND enoyl-CoA hydratase/isomerase echA AND 3-hydroxyacyl-CoA dehydrogenase fadB AND acetyl-CoA C-acetyltransferase fadA	pentcoa[c] + fad[c] + nad[c] + coa[c] -> ppcoa[c] + fadh2[c] + nadh[c] + accoa[c]	Rv0131c Rv0154c Rv0215c Rv0231 Rv0244c Rv0271c Rv0400c Rv0752c Rv0873 Rv0972c Rv0975c Rv1346 Rv1467c Rv1679 Rv1933c Rv1934c Rv2724c Rv2789c Rv3061c Rv3139 Rv3140 Rv3274c Rv3504 Rv3505 Rv3543c Rv3544c Rv3560c Rv3562 Rv3563 Rv3564 Rv3573c Rv3761c Rv3797 Rv0672 Rv2500c Rv0222 Rv0456c Rv0632c Rv0673 Rv0675 Rv0971c Rv1070c Rv1071c Rv1141c Rv1142c Rv1472 Rv1935c Rv2486 Rv2679 Rv2831 Rv3039c Rv3516 Rv35…	Beta oxidation of odd-numbered acyl chain fatty acids
3HIBD	3-hydroxyisobutyrate dehydrogenase	3hmp[c] + nad[c] -> 2mop[c] + nadh[c] + h[c]	Rv0751c	Sugar Metabolism
ALDR	Aldolase reductase	arab-D[c] + nadph[c] + h[c] -> arabl-D[c] + nadp[c]		Arabinogalactan Synthesis
AL4D	D-arabinitol 4-dehydrogenase	arabl-D[c] + nad[c] -> xylu-D[c] + nadh[c] + h[c]	Rv1928c	Arabinogalactan Synthesis
MANT1	Mannosyltransferase	PIM4[c] + decdman1p-tb[c] -> LM[c] + decd-tb[c]	Rv1166 Rv1635c Rv2174 Rv2181	LM/LAM Biosynthesis
ARABT	Arabinosyltransferase C	LM[c] + decda-tb[c] -> LAM[c] + decd-tb[c]	Rv1635c Rv2181 Rv3793	LM/LAM Biosynthesis
MANT2	Mannosyltranseferase	LAM[c] + decdman1p-tb[c] -> ManLAM[c] + decd-tb[c]	Rv1635c	LM/LAM Biosynthesis
HOAS	2-Hydroxy-3-Oxoadipate synthase	akg[c] + glx[c] + 3 h[c] -> hoa[c] + co2[c]	Rv1248c	Glutamate Metabolism
SR1	Nonenzymatic spontaneous decarboxylation	hoa[c] -> hla[c] + co2[c]		Glutamate Metabolism
SR2	Spontaneous reaction	dhap[c] -> mthgxl[c]		Pyruvate Metabolism
MR	Methylglyoxal reductase	mthgxl[c] + nadh[c] + h[c] -> lald[c] + nad[c]	Rv2298	Pyruvate Metabolism
GLYCS_I	Glyoxylase I	mthgxl[c] + gthrd[c] -> lgt-s[c]	Rv0577 Rv0911	Pyruvate Metabolism
GLYCS_II	Glyoxylase II	lgt-s[c] + h2o[c] -> gthrd[c] + lac-L[c] + h[c]	Rv0577 Rv0911	Pyruvate Metabolism
LALDD	Lactaldehyde dehydrogenase	lald[c] + nad[c] + h2o[c] -> lac-L[c] + nadh[c] + 2 h[c]		Pyruvate Metabolism
CYST_II	cysteine synthase II	pser-L[c] + h2s[c] -> pi[c] + cys-L[c]	Rv3684	Cysteine Metabolism
PreDeh	Prephenate Dehydratase	pphn[c] <=> phpyr[c] + h2o[c] + co2[c]	Rv3838c	Phenylalanine Tyrosine Tryptophan Metabolism
GLNSYT	Glutamine Synthase	glu-L[c] + atp[c] + nh4[c] <=> gln-L[c] + adp[c] + pi[c] + h[c]	Rv2221c	Glutamate Metabolism
FUSA1	Elongation Factor	gtp[c] + h2o[c] -> gdp[c] + pi[c] + h[c]	Rv0684	Miscellaneous
ISCS	Sulfer Removal	cys-L[c] <=> ala-L[c] + s[c]	Rv3025c	Cofactor Metabolism
ALATRS	Alanyl-tRNA synthetase	ala-L[c] + atp[c] + trnaala[c] -> alatrna[c] + amp[c] + ppi[c]	Rv2555c	tRNA Charging
ARGTRS	Arginyl-tRNA synthetase	arg-L[c] + atp[c] + trnaarg[c] -> amp[c] + argtrna[c] + ppi[c]	Rv1292	tRNA Charging
ASNTRS	Asparaginyl-tRNA synthetase	asn-L[c] + atp[c] + trnaasn[c] -> amp[c] + asntrna[c] + ppi[c]	Rv3009c Rv3011c Rv3012c	tRNA Charging
ASPTRS	Aspartyl-tRNA synthetase	asp-L[c] + atp[c] + trnaasp[c] -> amp[c] + asptrna[c] + ppi[c]	Rv2572c	tRNA Charging
CYSTRS	Cysteinyl-tRNA synthetase	atp[c] + cys-L[c] + trnacys[c] -> amp[c] + cystrna[c] + ppi[c]	Rv3580c	tRNA Charging
FMETTRS	Methionyl-tRNA formyltransferase	10fthf[c] + mettrna[c] -> fmettrna[c] + h[c] + thf[c]	Rv1406	tRNA Charging
GLNTRS	Glutaminyl-tRNA synthetase	atp[c] + gln-L[c] + trnagln[c] -> amp[c] + glntrna[c] + ppi[c]	Rv3009c Rv3011c Rv3012c	tRNA Charging
GLYTRS	Glycyl-tRNA synthetase	atp[c] + gly[c] + trnagly[c] -> amp[c] + glytrna[c] + ppi[c]	Rv2357c	tRNA Charging
HISTRS	Histidyl-tRNA synthetase	atp[c] + his-L[c] + trnahis[c] -> amp[c] + histrna[c] + ppi[c]	Rv2580c	tRNA Charging
ILETRS	Isoleucyl-tRNA synthetase	atp[c] + ile-L[c] + trnaile[c] -> amp[c] + iletrna[c] + ppi[c]	Rv1536	tRNA Charging
LEUTRS	Leucyl-tRNA synthetase	atp[c] + leu-L[c] + trnaleu[c] -> amp[c] + leutrna[c] + ppi[c]	Rv0041	tRNA Charging
LYSTRS	Lysyl-tRNA synthetase	atp[c] + lys-L[c] + trnalys[c] -> amp[c] + lystrna[c] + ppi[c]	Rv1640c Rv3598c	tRNA Charging
METTRS	Methionyl-tRNA synthetase	atp[c] + met-L[c] + trnamet[c] -> amp[c] + mettrna[c] + ppi[c]	Rv1007c	tRNA Charging
PHETRS	Phenylalanyl-tRNA synthetase	atp[c] + phe-L[c] + trnaphe[c] -> amp[c] + phetrna[c] + ppi[c]	Rv1649 Rv1650	tRNA Charging
PROTRS	Prolyl-tRNA synthetase	atp[c] + pro-L[c] + trnapro[c] -> amp[c] + ppi[c] + protrna[c]	Rv2845c	tRNA Charging
SELCYSS	selenocysteine synthase	selnp[c] + sertrna[sec][c] -> h[c] + pi[c] + sectrna[c]		tRNA Charging
SERTRS	Seryl-tRNA synthetase	atp[c] + ser-L[c] + trnaser[c] -> amp[c] + ppi[c] + sertrna[c]	Rv3834c	tRNA Charging
SERTRS2	Seryl-tRNA synthetase (selenocystein)	atp[c] + ser-L[c] + trnasecys[c] -> amp[c] + ppi[c] + sertrna[sec][c]	Rv3834c	tRNA Charging
THRTRS	Threonyl-tRNA synthetase	atp[c] + thr-L[c] + trnathr[c] -> amp[c] + ppi[c] + thrtrna[c]	Rv2614c	tRNA Charging
TRPTRS	Tryptophanyl-tRNA synthetase	atp[c] + trnatrp[c] + trp-L[c] -> amp[c] + ppi[c] + trptrna[c]	Rv3336c	tRNA Charging
TYRTRS	tyrosyl-tRNA synthetase	atp[c] + trnatyr[c] + tyr-L[c] -> amp[c] + ppi[c] + tyrtrna[c]	Rv1689	tRNA Charging
VALTRS	Valyl-tRNA synthetase	atp[c] + trnaval[c] + val-L[c] -> amp[c] + ppi[c] + valtrna[c]	Rv2448c	tRNA Charging
biomass_Mtb_9_60atp	biomass composition for Mycobacterium tuberculosis v 01 60 atp	0.001681 Ac1PIM1[c] + 0.001488 Ac1PIM2[c] + 0.001335 Ac1PIM3[c] + 0.001211 Ac1PIM4[c] + 0.001274 Ac2PIM2[c] + 0.002076 PIM1[c] + 0.00179 PIM2[c] + 0.001573 PIM3[c] + 0.001403 PIM4[c] + 0.001266 PIM5[c] + 0.001154 PIM6[c] + 0.23018 acgam1p[c] + 0.40596 ala-L[c] + 0.13903 amp[c] + 0.000731 arabinanagalfragund[c] + 0.015676 arach[c] + 0.12042 arg-L[c] + 0.047699 asn-L[c] + 0.12031 asp-L[c] + 60 atp[…		Exchange

## Sheet: Table.S1(B)
Metabolite name	Metabolite description	Metabolite charged formula
10fthf[c]	10-Formyltetrahydrofolate	C20H21N7O7
12dgr160[c]	1-2-Diacyl-sn-glycerol-dihexadecanoyl-n-C160	C35H68O5
13dpg[c]	3-Phospho-D-glyceroyl-phosphate	C3H4O10P2
1hdecg3p[c]	1-hexadecanoyl-sn-glycerol-3-phosphate	C19H37O7P1
1msg3p[c]	1-Acyl-sn-glycerol-3-phosphate-branched-C190	C22H43O7P
1pyr5c[c]	1-Pyrroline-5-carboxylate	C5H6NO2
23dhba[c]	2-3-Dihydroxybenzoyl-adenylate	C17H17N5O10P
23dhdp[c]	2-3-Dihydrodipicolinate	C7H5NO4
23dhmb[c]	R-2-3-Dihydroxy-3-methylbutanoate	C5H9O4
23dhmp[c]	R-2-3-Dihydroxy-3-methylpentanoate	C6H11O4
25aics[c]	S-2-5-Amino-1-5-phospho-D-ribosyl-imidazole-4-carboxamidosuccinate	C13H15N4O12P
25dhpp[c]	2-5-Diamino-6-hydroxy-4-5-phosphoribosylamino-pyrimidine	C9H14N5O8P
25drapp[c]	2-5-Diamino-6-ribosylamino-4-3H-pyrimidinone-5-phosphate	C9H14N5O8P
26dap-LL[c]	LL-2-6-Diaminoheptanedioate	C7H14N2O4
26dap-M[c]	meso-2-6-Diaminoheptanedioate	C7H14N2O4
2agpe160[c]	2-Acyl-sn-glycero-3-phosphoethanolamine-n-C160	C21H44NO7P1
2agpe180[c]	2-Acyl-sn-glycero-3-phosphoethanolamine-n-C180	C23H48NO7P1
2ahbut[c]	S-2-Aceto-2-hydroxybutanoate	C6H9O4
2ahhmd[c]	2-Amino-4-hydroxy-6-hydroxymethyl-7-8-dihydropteridine-diphosphate	C7H8N5O8P2
2ahhmp[c]	2-Amino-4-hydroxy-6-hydroxymethyl-7-8-dihydropteridine	C7H9N5O2
2c25dho[c]	2-Carboxy-2-5-dihydro-5-oxofuran-2-acetate	C7H6O6
2cpr5p[c]	1-2-Carboxyphenylamino-1-deoxy-D-ribulose-5-phosphate	C12H13NO9P
2dda7p[c]	2-Dehydro-3-deoxy-D-arabino-heptonate-7-phosphate	C7H10O10P
2dglcn[c]	2-Deoxy-D-gluconate	C6H11O6
2dhp[c]	2-Dehydropantoate	C6H9O4
2dmmq6[c]	2-Demethylmenaquinone-6	C40H54O2
2dmmq8[c]	2-Demethylmenaquinone-8	C50H70O2
2dmmql8[c]	2-Demethylmenaquinol-8	C50H72O2
2dr1p[c]	2-Deoxy-D-ribose-1-phosphate	C5H9O7P
2dr5p[c]	2-Deoxy-D-ribose-5-phosphate	C5H9O7P
2ippm[c]	2-Isopropylmaleate	C7H8O4
2mahmp[c]	2-Methyl-4-amino-5-hydroxymethylpyrimidine-diphosphate	C6H8N3O7P2
2me4p[c]	2-C-methyl-D-erythritol-4-phosphate	C5H11O7P
2mecdp[c]	2-C-methyl-D-erythritol-2-4-cyclodiphosphate	C5H10O9P2
2mop[c]	2-Methyl-3-oxopropanoate	C4H5O3
2obut[c]	2-Oxobutanoate	C4H5O3
2p4c2me[c]	2-phospho-4-cytidine-5-diphospho-2-C-methyl-D-erythritol	C14H22N3O17P3
2pg[c]	D-Glycerate-2-phosphate	C3H4O7P
2pglyc[c]	2-Phosphoglycolate	C2H2O6P
2shchc[c]	2-Succinyl-6-hydroxy-2-4-cyclohexadiene-1-carboxylate	C11H10O6
34hpp[c]	3-4-Hydroxyphenyl-pyruvate	C9H7O4
35cgmp[c]	3-5-Cyclic-GMP	C10H11N5O7P
3c2hmp[c]	3-Carboxy-2-hydroxy-4-methylpentanoate	C7H10O5
3c3hmp[c]	3-Carboxy-3-hydroxy-4-methylpentanoate	C7H10O5
3c4mop[c]	3-Carboxy-4-methyl-2-oxopentanoate	C7H8O5
3ddgc[c]	3-Dehydro-2-deoxy-D-gluconate	C6H9O6
3dhq[c]	3-Dehydroquinate	C7H9O6
3dhsk[c]	3-Dehydroshikimate	C7H7O5
3ig3p[c]	C--3-Indolyl-glycerol-3-phosphate	C11H12NO6P
3mob[c]	3-Methyl-2-oxobutanoate	C5H7O3
3mop[c]	S-3-Methyl-2-oxopentanoate	C6H9O3
3pg[c]	3-Phospho-D-glycerate	C3H4O7P
3php[c]	3-Phosphohydroxypyruvate	C3H2O7P
3psme[c]	5-O-1-Carboxyvinyl-3-phosphoshikimate	C10H9O10P
4abut[c]	4-Aminobutanoate	C4H9NO2
4abz[c]	4-Aminobenzoate	C7H6NO2
4adcho[c]	4-amino-4-deoxychorismate	C10H10NO5
4ahmmp[c]	4-Amino-5-hydroxymethyl-2-methylpyrimidine	C6H9N3O
4ampm[c]	4-Amino-2-methyl-5-phosphomethylpyrimidine	C6H8N3O4P
4c2me[c]	4-cytidine-5-diphospho-2-C-methyl-D-erythritol	C14H23N3O14P2
4h2opntn[c]	4-Hydroxy-2-oxopentanoate	C5H7O4
4hba[c]	4-Hydroxy-benzyl-alcohol	C7H8O2
4hbzACP[c]	4-hydroxybenzoyl-ACP	C18H25N2O9PRS
4hbz[c]	4-Hydroxybenzoate	C7H5O3
4hthr[c]	4-Hydroxy-L-threonine	C4H9NO4
4mhetz[c]	4-Methyl-5-2-hydroxyethyl-thiazole	C6H9NOS
4mop[c]	4-Methyl-2-oxopentanoate	C6H9O3
4mpetz[c]	4-Methyl-5-2-phosphoethyl-thiazole	C6H8NO4PS
4pasp[c]	4-Phospho-L-aspartate	C4H6NO7P
4per[c]	4-Phospho-D-erythronate	C4H6O8P
4ppan[c]	D-4-Phosphopantothenate	C9H15NO8P
4ppcys[c]	N--R-4-Phosphopantothenoyl-L-cysteine	C12H20N2O9PS
4r5au[c]	4-1-D-Ribitylamino-5-aminouracil	C9H16N4O6
5aizc[c]	5-amino-1-5-phospho-D-ribosyl-imidazole-4-carboxylate	C9H11N3O9P
5aop[c]	5-Amino-4-oxopentanoate	C5H9NO3
5aprbu[c]	5-Amino-6-5-phosphoribitylamino-uracil	C9H15N4O9P
5apru[c]	5-Amino-6-5-phosphoribosylamino-uracil	C9H13N4O9P
5caiz[c]	5-phosphoribosyl-5-carboxyaminoimidazole	C9H11N3O9P
5dglcn[c]	5-Dehydro-D-gluconate	C6H9O7
5fthf[c]	5-Formyltetrahydrofolate	C20H21N7O7
5mta[c]	5-Methylthioadenosine	C11H15N5O3S
5mthf[c]	5-Methyltetrahydrofolate	C20H24N7O6
5mtr[c]	5-Methylthio-D-ribose	C6H12O4S
5odhf2a[c]	5-Oxo-4-5-dihydrofuran-2-acetate	C6H5O4
5oxpro[c]	5-Oxoproline	C5H6NO3
5prdmbz[c]	N1-5-Phospho-alpha-D-ribosyl-5-6-dimethylbenzimidazole	C14H17N2O7P
6hmhpt[c]	6-hydroxymethyl-dihydropterin	C7H9N5O2
6hmhptpp[c]	6-hydroxymethyl-dihydropterin-pyrophosphate	C7H8N5O8P2
6pgc[c]	6-Phospho-D-gluconate	C6H10O10P
6pgl[c]	6-phospho-D-glucono-1-5-lactone	C6H9O9P
8aonn[c]	8-Amino-7-oxononanoate	C9H17NO3
ACP[c]	acyl-carrier-protein	C11H21N2O7PRS
Ac1PIM1[c]	acyl-phosphatidylinositol-mannoside-tuberculosis	C66H124O19P
Ac1PIM2[c]	acyl-phosphatidylinositol-mannoside-di-mannose-tuberculosis	C72H134O24P
Ac1PIM3[c]	acyl-phosphatidylinositol-mannoside-tri-mannose-tuberculosis	C78H144O29P
Ac1PIM4[c]	acyl-phosphatidylinositol-mannoside-tetra-mannose-tuberculosis	C84H154O34P
Ac2PIM2[c]	di-acyl-phosphatidylinositol-mannoside-di-mannose-tuberculosis	C88H164O25P
PIM1[c]	phosphatidylinositol-mannoside-tuberculosis	C50H94O18P
PIM2[c]	phosphatidylinositol-mannoside-di-mannose-tuberculosis	C56H104O23P
PIM3[c]	phosphatidylinositol-mannoside-tri-mannose-tuberculosis	C62H114O28P
PIM4[c]	phosphatidylinositol-mannoside-tetra-mannose-tuberculosis	C68H124O33P
PIM5[c]	phosphatidylinositol-mannoside-penta-mannose-tuberculosis	C74H134O38P
PIM6[c]	phosphatidylinositol-mannoside-hexa-mannose-tuberculosis	C80H144O43P
aacoa[c]	Acetoacetyl-CoA	C25H36N7O18P3S
ac[c]	Acetate	C2H3O2
acac[c]	Acetoacetate	C4H5O3
acald[c]	Acetaldehyde	C2H4O
accoa[c]	Acetyl-CoA	C23H34N7O17P3S
acg5p[c]	N-Acetyl-L-glutamyl-5-phosphate	C7H9NO8P
acg5sa[c]	N-Acetyl-L-glutamate-5-semialdehyde	C7H10NO4
acgam1p[c]	N-Acetyl-D-glucosamine-1-phosphate	C8H14NO9P
acgam6p[c]	N-Acetyl-D-glucosamine-6-phosphate	C8H14NO9P
acgam[c]	N-Acetyl-D-glucosamine	C8H15NO6
acglu[c]	N-Acetyl-L-glutamate	C7H9NO5
achms[c]	O-Acetyl-L-homoserine	C6H11NO4
acorn[c]	N2-Acetyl-L-ornithine	C7H14N2O3
acser[c]	O-Acetyl-L-serine	C5H9NO4
actp[c]	Acetyl-phosphate	C2H3O5P
acysbmn[c]	acetyl-cystine-bimane	C15H18N3O5S
acysbmn[e]	acetyl-cystine-bimane	C15H18N3O5S
ad[c]	acetamide	C2H5NO
adcobdam[c]	Adenosyl-cobyrinate-diamide	C55H68CoN11O15
adcobhex[c]	adenosyl-cobyric-acid	C55H76CoN15O11
ade[c]	Adenine	C5H5N5
adfdOX[c]	Oxidized-adrenal-ferredoxin	UK
adfdRD[c]	Reduced-adrenal-ferredoxin	UKH2
adhlam[c]	S-Acetyldihydrolipoamide	C10H19NO2S2
adn[c]	Adenosine	C10H13N5O4
adocbi[c]	Adenosyl-cobinamide	C58H84CoN16O11
adocbip[c]	Adenosyl-cobinamide-phosphate	C58H83CoN16O14P
adocbl[c]	Adenosylcobalamin	C72H100CoN18O17P
adp[c]	ADP	C10H12N5O10P2
adpglc[c]	ADPglucose	C16H23N5O15P2
agalfragund[c]	arabinofuranose-galactofuranosyl-30-rhamanosyl-N-acetylglucosamyl-undecaprenyl-diphosphate-M-tb	C254H423NO171P2
agdpcbi[c]	Adenosine-GDP-cobinamide	C68H95CoN21O21P2
agm[c]	Agmatine	C5H16N4
ahcys[c]	S-Adenosyl-L-homocysteine	C14H20N6O5S
ahdt[c]	2-Amino-4-hydroxy-6-erythro-1-2-3-trihydroxypropyl-dihydropteridine-triphosphate	C9H12N5O13P3
aicar[c]	5-Amino-1-5-Phospho-D-ribosyl-imidazole-4-carboxamide	C9H13N4O8P
air[c]	5-amino-1-5-phospho-D-ribosyl-imidazole	C8H12N3O7P
akg[c]	2-Oxoglutarate	C5H4O5
ala-B[c]	beta-Alanine	C3H7NO2
ala-B[e]	beta-Alanine	C3H7NO2
ala-D[c]	D-Alanine	C3H7NO2
ala-D[e]	D-Alanine	C3H7NO2
ala-L[c]	L-Alanine	C3H7NO2
ala-L[e]	L-Alanine	C3H7NO2
alaala[c]	D-Alanyl-D-alanine	C6H12N2O3
alac-S[c]	S-2-Acetolactate	C5H7O4
alatrna[c]	L-Alanyl-tRNA-Ala	C3H6NOR
alpam[c]	S-aminomethyldihydrolipoamide	C9H21N2OS2
alpro[c]	S-Aminomethyldihydrolipoylprotein	CH6NS2X
aacald[c]	Aminoacetaldehyde	C2H5NO
amet[c]	S-Adenosyl-L-methionine	C15H23N6O5S
ametam[c]	S-Adenosylmethioninamine	C14H24N6O3S
amob[c]	S-Adenosyl-4-methylthio-2-oxobutanoate	C15H19N5O6S
amp[c]	AMP	C10H12N5O7P
anth[c]	Anthranilate	C7H6NO2
apoACP[c]	apoprotein-acyl-carrier-protein	RHO
appl[c]	1-Aminopropan-2-ol	C3H10NO
applp[c]	D-1-Aminopropan-2-ol-O-phosphate	C3H9NO4P
aps[c]	Adenosine-5-phosphosulfate	C10H12N5O10PS
arab-D[c]	D-Arabinose	C5H10O5
arab-D[e]	D-Arabinose	C5H10O5
arab-L[c]	L-Arabinose	C5H10O5
arab-L[e]	L-Arabinose	C5H10O5
arabinan[c]	arabinan-complex-Mtb	C684H1104O552
arabinanagalfragund[c]	arabinan-arabinofuranose-galactofuranosyl-30-rhamanosyl-N-acetylglucosamyl-undecaprenyl-diphosphate-M-tb	C938H1525NO722P2
arachACP[c]	eicosanoyl-ACP	C31H59N2O8PRS
arach[c]	Arachidic-acid	C20H39O2
arachcoa[c]	arachidyl-coenzyme-A	C41H70N7O17P3S
arg-L[c]	L-Arginine	C6H15N4O2
arg-L[e]	L-Arginine	C6H15N4O2
argsuc[c]	N-omega--L-Arginino-succinate	C10H17N4O6
arpp[c]	5-phosphoarabinose-pyrophosphate	C5H8O14P3
asn-L[c]	L-Asparagine	C4H8N2O3
asn-L[e]	L-Asparagine	C4H8N2O3
asp-L[c]	L-Aspartate	C4H6NO4
asp-L[e]	L-Aspartate	C4H6NO4
aspsa[c]	L-Aspartate-4-semialdehyde	C4H7NO3
atp[c]	ATP	C10H12N5O13P3
atp[e]	ATP	C10H12N5O13P3
betald[c]	Betaine-aldehyde	C5H12NO
bhb[c]	R-3-Hydroxybutanoate	C4H7O3
bmn[c]	bimane	C10H12N2O2
bmn[e]	bimane	C10H12N2O2
bmnmsh[c]	bimane-conjugated-mycothiol-mtb	C27H40N4O14S
btamp[c]	Biotinyl-5-AMP	C20H27N7O9PS
btn[c]	Biotin	C10H15N2O3S
ca2[c]	Calcium	Ca
ca2[e]	Calcium	Ca
camp[c]	cAMP	C10H11N5O6P
cbasp[c]	N-Carbamoyl-L-aspartate	C5H6N2O5
cbi[c]	Cobinamide	C48H72CoN11O8
cbl1[c]	Cob-I-alamin	C62H88CoN13O14P
cbp[c]	Carbamoyl-phosphate	CH2NO5P
cdp[c]	CDP	C9H12N3O11P2
cdpc16c19g[c]	cdp-diacylglycerol-C160-C190	C47H85N3O15P2
cdpc19c19g[c]	cdp-diacylglycerol-C190-C190	C50H91N3O15P2
cdpdhdecg[c]	CDP-1-2-dihexadecanoylglycerol	C44H79N3O15P2
cdpdodecg[c]	CDP-1-2-dioctadecanoylglycerol	C48H87N3O15P2
cgly[c]	Cys-Gly	C5H10N2O3S
chexccoa[c]	carboxy-hexacosanoyl-CoA	C48H81N7O18P3S
chol[c]	Choline	C5H14NO
chol[e]	Choline	C5H14NO
chor[c]	chorismate	C10H8O6
cigam[c]	cys-1D-myo-inositol-2-deoxy-D-glucopyranoside	C15H28N2O11S
cit[c]	Citrate	C6H5O7
cit[e]	Citrate	C6H5O7
citr-L[c]	L-Citrulline	C6H13N3O3
cl[c]	Chloride	Cl
cl[e]	Chloride	Cl
clpn160190[c]	cardiolipin-dihexadecanoyl-dimethylstearoyl	C79H152O17P2
cmcbtt[c]	carboxymycobactin-T-R8-carbon-final-carbon-is-carboxyl-group	C33H48N5O13
cmp[c]	CMP	C9H12N3O8P
co1dam[c]	Cob-I-yrinate-a-c-diamide	C45H56CoN6O12
co2[c]	CO2	CO2
co2[e]	CO2	CO2
co2dam[c]	Cob-II-yrinate-a-c-diamide	C45H56CoN6O12
co[c]	Carbon-monoxide	CO
co[e]	Carbon-monoxide	CO
coa[c]	Coenzyme-A	C21H32N7O16P3S
coa[e]	Coenzyme-A	C21H32N7O16P3S
cobalt2[c]	Co2	Co
cobalt2[e]	Co2	Co
cobya[c]	Cobyrinate	C45H52N4O14Co
codhpre6[c]	cobalt-dihydro-precorrin-6	C44H47N4O16Co
copre2[c]	cobalt-precorrin-2	C42H38N4O16Co
copre3[c]	cobalt-precorrin-3	C43H40N4O16Co
copre4[c]	cobalt-precorrin-4	C44H43N4O16Co
copre5[c]	cobalt-precorrin-5	C45H45N4O16Co
copre6[c]	cobalt-precorrin-6	C44H45N4O16Co
copre8[c]	cobalt-precorrin-8	C45H52N4O14Co
cpppg1[c]	Coproporphyrinogen-I	C36H40N4O8
cpppg3[c]	Coproporphyrinogen-III	C36H40N4O8
crn[c]	L-Carnitine	C7H15NO3
crn[e]	L-Carnitine	C7H15NO3
ctp[c]	CTP	C9H12N3O14P3
cu2[c]	Cu2	Cu
cu2[e]	Cu2	Cu
cyan[c]	Hydrogen-cyanide	CHN
cys-L[c]	L-Cysteine	C3H7NO2S
cyst-L[c]	L-Cystathionine	C7H14N2O4S
cytd[c]	Cytidine	C9H13N3O5
cytd[e]	Cytidine	C9H13N3O5
dad-2[c]	Deoxyadenosine	C10H13N5O3
dadp[c]	dADP	C10H12N5O9P2
damp[c]	dAMP	C10H12N5O6P
dann[c]	7-8-Diaminononanoate	C9H21N2O2
datp[c]	dATP	C10H12N5O12P3
db4p[c]	3-4-dihydroxy-2-butanone-4-phosphate	C4H7O6P
dca[c]	Decanoate-n-C100	C10H19O2
dcamp[c]	N6-1-2-Dicarboxyethyl-AMP	C14H14N5O11P
dcdp[c]	dCDP	C9H12N3O10P2
dcmp[c]	dCMP	C9H12N3O7P
dctp[c]	dCTP	C9H12N3O13P3
dcyt[c]	Deoxycytidine	C9H13N3O4
ddca[c]	Dodecanoate-n-C120	C12H23O2
decd-tb[c]	E-E-E-E-E-E-E-Z-Z-decaprenyl-phosphate	C50H81O4P
decda-tb[c]	decaprenylphosphoryl-beta-D-arabinofuranose	C55H89O8P
decdman1p-tb[c]	E-E-E-E-E-E-E-Z-Z-decaprenyl-mannose-phosphate	C56H92O9P
decdp[c]	all-trans-Decaprenyl-diphosphate	C50H81O7P2
decdp-tb[c]	E-E-E-E-E-E-E-Z-Z-Decaprenyl-diphosphate	C50H81O7P2
decdpa-tb[c]	decaprenylphosphoryl-beta-D-5-phosphoarabinofuranose	C55H88O11P2
decdpr-tb[c]	decaprenylphosphoryl-beta-D-5-phosphoribose	C55H88O11P2
decdr-tb[c]	decaprenylphosphoryl-beta-D-5-ribose	C55H89O8P
dgdp[c]	dGDP	C10H12N5O10P2
dgmp[c]	dGMP	C10H12N5O7P
dgsn[c]	Deoxyguanosine	C10H13N5O4
dgtp[c]	dGTP	C10H12N5O13P3
dhap[c]	Dihydroxyacetone-phosphate	C3H5O6P
dhf[c]	7-8-Dihydrofolate	C19H19N7O6
dhlam[c]	Dihydrolipoamide	C8H17NOS2
dhlpro[c]	Dihydrolipolprotein	H2S2X
dhna[c]	1-4-Dihydroxy-2-naphthoate	C11H7O4
dhnpt[c]	Dihydroneopterin	C9H13N5O4
dhor-S[c]	S-Dihydroorotate	C5H5N2O4
dhpmp[c]	Dihydroneopterin-monophosphate	C9H12N5O7P
dhpt[c]	Dihydropteroate	C14H13N6O3
din[c]	Deoxyinosine	C10H12N4O4
dmarach[c]	di-methyl-arachic-acid	C22H43O2
dmbhn[c]	di-methyl-behenic-acid	C24H47O2
dmbzid[c]	5-6-Dimethylbenzimidazole	C9H10N2
dmlgnc[c]	dimethyl-lignoceric-acid	C26H51O2
dmlz[c]	6-7-Dimethyl-8-1-D-ribityl-lumazine	C13H18N4O6
dmpp[c]	Dimethylallyl-diphosphate	C5H9O7P2
dnad[c]	Deamino-NAD	C21H24N6O15P2
dpcoa[c]	Dephospho-CoA	C21H33N7O13P2S
dscl[c]	dihydrosirohydrochlorin	C42H41N4O16
dtbt[c]	Dethiobiotin	C10H17N2O3
dtdp4d6dg[c]	dTDP-4-dehydro-6-deoxy-D-glucose	C16H22N2O15P2
dtdp4d6dm[c]	dTDP-4-dehydro-6-deoxy-L-mannose	C16H22N2O15P2
dtdp[c]	dTDP	C10H13N2O11P2
dtdpglu[c]	dTDPglucose	C16H24N2O16P2
dtdprmn[c]	dTDP-L-rhamnose	C16H24N2O15P2
dtmp[c]	dTMP	C10H13N2O8P
dttOX[c]	Oxidized-dithiothreitol	C4H8O2S2
dtt[c]	Dithiothreitol	C4H10O2S2
dttp[c]	dTTP	C10H13N2O14P3
dudp[c]	dUDP	C9H11N2O11P2
dump[c]	dUMP	C9H11N2O8P
duri[c]	Deoxyuridine	C9H12N2O5
dutp[c]	dUTP	C9H11N2O14P3
dxyl5p[c]	1-deoxy-D-xylulose-5-phosphate	C5H9O7P
dxyl[c]	1-deoxy-D-xylulose	C5H10O4
e4p[c]	D-Erythrose-4-phosphate	C4H7O7P
eig3p[c]	D-erythro-1-Imidazol-4-yl-glycerol-3-phosphate	C6H9N2O6P
enter[c]	Enterochelin	C30H27N3O15
etha[c]	Ethanolamine	C2H8NO
etha[e]	Ethanolamine	C2H8NO
ethn[c]	Ethylnitronate	C2H4NO2
f6p[c]	D-Fructose-6-phosphate	C6H11O9P
fad[c]	Flavin-adenine-dinucleotide-oxidized	C27H31N9O15P2
fadh2[c]	Flavin-adenine-dinucleotide-reduced	C27H33N9O15P2
fald[c]	Formaldehyde	CH2O
fc1p[c]	L-Fuculose-1-phosphate	C6H11O8P
fcmcbtt[c]	iron-III-chelated-carboxymycobactin-T-R8-carbon-final-carbon-is-carboxyl-group	C33H48N5O13Fe
fdox[c]	ferredoxin-oxidized-24Fe-4S	Fe8S8X
fdp[c]	D-Fructose-1-6-bisphosphate	C6H10O12P2
fdred[c]	ferredoxin-reduced-24Fe-4S	Fe8S8X
fdxox[c]	Oxidized-ferredoxin	X
fdxrd[c]	Reduced-ferredoxin	XH2
fe2[c]	Fe2	Fe
fe2[e]	Fe2	Fe
fe3[c]	Fe3	Fe
fe3[e]	Fe3	Fe
fgam[c]	N2-Formyl-N1-5-phospho-D-ribosyl-glycinamide	C8H13N2O9P
ficytc[c]	Ferricytochrome-c	C42H52FeN8O6S2
fmcbtt[c]	Iron-II-mycobactin-T	C43H71N5O10Fe
fmettrna[c]	N-Formylmethionyl-tRNA	C6H9NO2SR
fmn[c]	FMN	C17H19N4O9P
fmnh2[c]	Reduced FMN	C17H21N4O9P
focytc[c]	Ferrocytochrome-c	C42H53FeN8O6S2
fol[c]	Folate	C19H18N7O6
for[c]	Formate	CH1O2
forcoa[c]	Formyl-CoA	C22H32N7O17P3S
fpram[c]	2-Formamido-N1-5-phospho-D-ribosyl-acetamidine	C8H15N3O8P
fprica[c]	5-Formamido-1-5-phospho-D-ribosyl-imidazole-4-carboxamide	C10H13N4O9P
frdp[c]	Farnesyl-diphosphate	C15H25O7P2
frrppdima[c]	fucose-rhamnose-rhamnose-phenol-phthiocerol-dimycocerosate-Mtb	C117H218O18
fum[c]	Fumarate	C4H2O4
fum[e]	Fumarate	C4H2O4
g1p[c]	D-Glucose-1-phosphate	C6H11O9P
g3p[c]	Glyceraldehyde-3-phosphate	C3H5O6P
g3pe[c]	sn-Glycero-3-phosphoethanolamine	C5H14NO6P
g6p[c]	D-Glucose-6-phosphate	C6H11O9P
gal1p[c]	alpha-D-Galactose-1-phosphate	C6H11O9P
gal[c]	D-Galactose	C6H12O6
gal[e]	D-Galactose	C6H12O6
galfragund[c]	galactofuranosyl-30-rhamanosyl-N-acetylglucosamyl-undecaprenyl-diphosphate-M-tb	C249H415NO167P2
gam1p[c]	D-Glucosamine-1-phosphate	C6H13NO8P
gam6p[c]	D-Glucosamine-6-phosphate	C6H13NO8P
gar[c]	N1-5-Phospho-D-ribosyl-glycinamide	C7H14N2O8P
gcald[c]	Glycolaldehyde	C2H4O2
gdp[c]	GDP	C10H12N5O11P2
gdpddman[c]	GDP-4-dehydro-6-deoxy-D-mannose	C16H21N5O15P2
gdpfuc[c]	GDP-L-fucose	C16H23N5O15P2
gdpmann[c]	GDP-D-mannose	C16H23N5O16P2
gdptp[c]	Guanosine-3-diphosphate-5-triphosphate	C10H11N5O20P5
glc-D[c]	D-Glucose	C6H12O6
glc-D[e]	D-Glucose	C6H12O6
glcn[c]	D-Gluconate	C6H11O7
gln-L[c]	L-Glutamine	C5H10N2O3
glu1sa[c]	L-Glutamate-1-semialdehyde	C5H9NO3
glu5p[c]	L-Glutamate-5-phosphate	C5H8NO7P
glu5sa[c]	L-Glutamate-5-semialdehyde	C5H9NO3
glu-D[c]	D-Glutamate	C5H8NO4
glu-L[c]	L-Glutamate	C5H8NO4
glu-L[e]	L-Glutamate	C5H8NO4
gluala[c]	5-L-Glutamyl-L-alanine	C8H13N2O5
glucys[c]	gamma-L-Glutamyl-L-cysteine	C8H13N2O5S
glutrna[c]	L-Glutamyl-tRNA-Glu	C5H7NO3R
glx[c]	Glyoxylate	C2H1O3
gly[c]	Glycine	C2H5NO2
gly[e]	Glycine	C2H5NO2
glyb[c]	Glycine-betaine	C5H11NO2
glyb[e]	Glycine-betaine	C5H11NO2
glyc3p[c]	Glycerol-3-phosphate	C3H7O6P
glyc3p[e]	Glycerol-3-phosphate	C3H7O6P
glyc-R[c]	R-Glycerate	C3H5O4
glyc[c]	Glycerol	C3H8O3
glyc[e]	Glycerol	C3H8O3
glyclt[c]	Glycolate	C2H3O3
glycogen[c]	glycogen	C6H10O5
gmp[c]	GMP	C10H12N5O8P
grdp[c]	Geranyl-diphosphate	C10H17O7P2
gsn[c]	Guanosine	C10H13N5O5
gthox[c]	Oxidized-glutathione	C20H30N6O12S2
gthrd[c]	Reduced-glutathione	C10H16N3O6S
gthrd[e]	Reduced-glutathione	C10H16N3O6S
gtp[c]	GTP	C10H12N5O14P3
gua[c]	Guanine	C5H5N5O
h2[c]	H2	H2
h2[e]	H2	H2
h2co3[c]	carbonic-acid	H2CO3
h2co3[e]	carbonic-acid	H2CO3
h2mb4p[c]	1-hydroxy-2-methyl-2-E-butenyl-4-diphosphate	C5H9O8P2
h2o2[c]	Hydrogen-peroxide	H2O2
h2o[c]	H2O	H2O
h2o[e]	H2O	H2O
h2s[c]	Hydrogen-sulfide	H2S
h2s[e]	Hydrogen-sulfide	H2S
h[c]	H	H
h[e]	H	H
harab-D[c]	hexa-arabinofuranoside	C30H50O25
hco3[c]	Bicarbonate	CHO3
hcys-L[c]	L-Homocysteine	C4H9NO2S
hdca[c]	Hexadecanoate-n-C160	C16H31O2
hdca[e]	Hexadecanoate-n-C160	C16H31O2
hdcea[c]	Hexadecenoate-n-C161	C16H29O2
hdcoa[c]	Hexadecenoyl-CoA-n-C161CoA	C37H60N7O17P3S
hexc[c]	hexacosanoate-n-C260	C26H51O2
hexccoa[c]	Hexacosanoyl-CoA-n-C260CoA	C47H82N7O17P3S
hgbam[c]	Hydrogenobyrinate-a-c-diamide	C45H57N6O12
hgbyr[c]	Hydrogenobyrinate	C45H54N4O14
his-L[c]	L-Histidine	C6H9N3O2
his-L[e]	L-Histidine	C6H9N3O2
hisp[c]	L-Histidinol-phosphate	C6H11N3O4P
histd[c]	L-Histidinol	C6H12N3O
hmbil[c]	Hydroxymethylbilane	C40H38N4O17
hmocta[c]	hexa-methyl-octacosanoate	C34H67O2
hmtria[c]	hexa-methyl-triacontanoic-acid-C300-plus-6-methyl-branches	C36H71O2
hom-L[c]	L-Homoserine	C4H9NO3
homtta[c]	10-hydroxy-octa-methyl-tetracontatricosanoic-acid-C340-8-methyl-branched-carbons-1-hydroxylated-carbon	C42H83O3
hpglu[c]	Tetrahydropteroyltri-L-glutamate	C24H34N8O12
hpmdtria[c]	hepta-methyl-dotriacontanoic-acid-7-methyl-branches	C39H77O2
hpmtria[c]	hepta-methyl-triacontanoic-acid-C300-plus-7-methyl-branches	C37H73O2
hxan[c]	Hypoxanthine	C5H4N4O
iacgam[c]	1D-myo-inositol-2-Acetamido-2-deoxy-D-glucopyranoside	C14H25NO11
iasp[c]	Iminoaspartate	C4H3NO4
ichor[c]	Isochorismate	C10H8O6
icit[c]	Isocitrate	C6H5O7
id3acald[c]	Indole-3-acetaldehyde	C10H9NO
id3acald[e]	Indole-3-acetaldehyde	C10H9NO
idp[c]	IDP	C10H11N4O11P2
igam[c]	1D-myo-inositol-2-deoxy-D-glucopyranoside	C12H24NO10
ile-L[c]	L-Isoleucine	C6H13NO2
ile-L[e]	L-Isoleucine	C6H13NO2
imacp[c]	3-Imidazol-4-yl-2-oxopropyl-phosphate	C6H7N2O5P
imp[c]	IMP	C10H11N4O8P
indole[c]	Indole	C8H7N
indpyr[c]	Indolepyruvate	C11H8NO3
inost[c]	myo-Inositol	C6H12O6
ins[c]	Inosine	C10H12N4O5
ipdp[c]	Isopentenyl-diphosphate	C5H9O7P2
itp[c]	ITP	C10H11N4O14P3
k[c]	potassium	K
k[e]	potassium	K
kmeroacidACP[c]	keto-meroacid-ACP	C69H131N2O8PRS
kmeroacidcyc1ACP[c]	cyclopropanated-keto-meroacid-ACP-1-cyclopropane-ring	C70H133N2O8PRS
kmeroacidcyc2ACP[c]	cyclopropanated-keto-meroacid-ACP-2-cyclopropane-rings	C71H135N2O8PRS
kmeroacidcyc2AMP[c]	cyclopropanated-keto-meroacid-AMP-2-cyclopropane-rings	C70H127N5O8P
kmycolate[c]	keto-mycolate-2-cyclopropanated-rings	C86H166O3
lac-L[c]	L-Lactate	C3H5O3
lac-L[e]	L-Lactate	C3H5O3
lald-L[c]	L-Lactaldehyde	C3H6O2
lcts[c]	Lactose	C12H22O11
lcts[e]	Lactose	C12H22O11
leu-L[c]	L-Leucine	C6H13NO2
leu-L[e]	L-Leucine	C6H13NO2
lpam[c]	Lipoamide	C8H15NOS2
lpro[c]	Lipoylprotein	S2X
lys-L[c]	L-Lysine	C6H15N2O2
lys-L[e]	L-Lysine	C6H15N2O2
m1ocdca[c]	methyl-octadecanoate	C19H37O2
malACP[c]	Malonyl-acyl-carrier-protein	C14H22N2O10PRS
mal-L[c]	L-Malate	C4H4O5
mal-L[e]	L-Malate	C4H4O5
malcoa[c]	Malonyl-CoA	C24H33N7O19P3S
malt[c]	Maltose	C12H22O11
malt[e]	Maltose	C12H22O11
malthp[c]	Maltoheptaose	C42H72O36
malthp[e]	Maltoheptaose	C42H72O36
maltpt[c]	Maltopentaose	C30H52O26
man1p[c]	D-Mannose-1-phosphate	C6H11O9P
man6p[c]	D-Mannose-6-phosphate	C6H11O9P
man[c]	D-Mannose	C6H12O6
marach[c]	methyl-arachidic-acid	C21H41O2
mbhn[c]	methyl-behenic-acid	C23H45O2
mcbts[c]	mycobactin-S	C44H73N5O10
mcbtt[c]	mycobactin-T	C43H71N5O10
meoh[c]	Methanol	CH4O1
meoh[e]	Methanol	CH4O1
meroacidACP[c]	alpha-meroacid-ACP	C61H115N2O8PRS
meroacidcyc1ACP[c]	cyclopropanated-alpha-meroacid-ACP-1-cyclopropane-ring	C62H117N2O8PRS
meroacidcyc2ACP[c]	cyclopropanated-alpha-meroacid-ACP-2-cyclopropane-rings	C63H119N2O8PRS
meroacidcyc2AMP[c]	cyclopropanated-alpha-meroacid-AMP-2-cyclopropane-rings	C62H111N5O8P
met-L[c]	L-Methionine	C5H11NO2S
met-L[e]	L-Methionine	C5H11NO2S
methf[c]	5-10-Methenyltetrahydrofolate	C20H20N7O6
metsox-R-L[c]	L-methionine-R-sulfoxide	C5H11NO3S
metsox-S-L[c]	L-Methionine-Sulfoxide	C5H11NO3S
mettrna[c]	L-Methionyl-tRNA-Met	C5H10NOSR
mfrrppdima[c]	phenolic-glycolipid-Mtb	C121H226O18
mg2[c]	magnesium	Mg
mg2[e]	magnesium	Mg
mharab-D[c]	mannose-capped-hexa-arabinofuranoside	C48H80O40
mhpglu[c]	5-Methyltetrahydropteroyltri-L-glutamate	C25H36N8O12
mi1p-D[c]	1D-myo-Inositol-1-phosphate	C6H11O9P
mi3p-D[c]	1D-myo-Inositol-3-phosphate	C6H11O9P
mi4p-D[c]	1D-myo-Inositol-4-phosphate	C6H11O9P
mkmeroacidACP[c]	methyl-hydroxy-keto-meroacid-ACP-1-cyclopropane-ring	C70H135N2O9PRS
mkmeroacidcyc1ACP[c]	cyclopropanated-methyl-hydroxy-keto-meroacid-ACP-1-cyclopropane-ring	C71H137N2O9PRS
mkmeroacidcyc1AMP[c]	cyclopropanated-methyl-hydroxy-keto-meroacid-AMP-1-cyclopropane-ring	C70H129N5O9P
mkmycolate[c]	keto-mycolate-1-cyclopropanated-rings	C86H168O4
mlthf[c]	5-10-Methylenetetrahydrofolate	C20H21N7O6
mmcoa-R[c]	R-Methylmalonyl-CoA	C25H35N7O19P3S
mmcoa-S[c]	S-Methylmalonyl-CoA	C25H35N7O19P3S
mmeroacidACP[c]	methoxy-meroacid-ACP	C67H127N2O8PRS
mmeroacidcyc1ACP[c]	cyclopropanated-methoxy-meroacid-ACP-1-cyclopropane-ring	C68H129N2O8PRS
mmeroacidcyc2ACP[c]	cyclopropanated-methoxy-meroacid-ACP-2-cyclopropane-rings	C69H131N2O8PRS
mmeroacidcyc2AMP[c]	cyclopropanated-methoxy-meroacid-AMP-2-cyclopropane-rings	C68H123N5O8P
mmmeroacidACP[c]	methyl-hydroxy-methoxy-meroacid-ACP	C68H131N2O9PRS
mmmeroacidcyc1ACP[c]	cyclopropanated-methyl-hydroxy-methoxy-meroacid-ACP-1-cyclopropane-ring	C69H133N2O9PRS
mmmeroacidcyc1AMP[c]	cyclopropanated-methyl-hydroxy-methoxy-meroacid-AMP-1-cyclopropane-ring	C68H125N5O9P
mmmycolate[c]	methoxy-mycolate-1-cyclopropanated-ring	C84H164O4
mmycolate[c]	methoxy-mycolate-2-cyclopropanated-rings	C84H162O3
mndn[c]	menadione	C11H8O2
mocdca[c]	10-methylstearic-acid	C19H37O2
motre[c]	maltooligosyltrehalose	C42H72O36
mppp9[c]	Magnesium-protoporphyrin	C34H30MgN4O4
mql6[c]	Menaquinol-6	C41H58O2
mql8[c]	Menaquinol-8	C51H74O2
mqn6[c]	Menaquinone-6	C41H56O2
mqn8[c]	Menaquinone-8	C51H72O2
msa[c]	Malonate-semialdehyde	C3H3O3
msh[c]	mycothiol-reduced	C17H30N2O12S
mshfald[c]	mycothiol-conjugated-methanol	C18H32N2O13S
mshfaldox[c]	mycothiol-conjugated-aldehyde	C18H30N2O13S
mssg[c]	mycothiol-oxidized--dimer	C34H58N4O24S2
mstrACP[c]	10methyl-stearyoyl-ACP	C30H57N2O8PRS
mycolate[c]	mycolate--2-cyclopropanated-rings	C78H150O3
na1[c]	Sodium	Na
na1[e]	Sodium	Na
nac[c]	Nicotinate	C6H4NO2
nad[c]	Nicotinamide-adenine-dinucleotide	C21H26N7O14P2
nadh[c]	Nicotinamide-adenine-dinucleotide--reduced	C21H27N7O14P2
nadp[c]	Nicotinamide-adenine-dinucleotide-phosphate	C21H25N7O17P3
nadph[c]	Nicotinamide-adenine-dinucleotide-phosphate--reduced	C21H26N7O17P3
ncam[c]	Nicotinamide	C6H6N2O
nh4[c]	Ammonium	H4N
nh4[e]	Ammonium	H4N
nh4oh[c]	Ammonium-hydroxide	H5NO
nicrnt[c]	Nicotinate-D-ribonucleotide	C11H12NO9P
no2[c]	Nitrite	NO2
no2[e]	Nitrite	NO2
no3[c]	Nitrate	NO3
no3[e]	Nitrate	NO3
no[c]	Nitric-oxide	NO
no[e]	Nitric-oxide	NO
o2[c]	O2	O2
o2[e]	O2	O2
o2s[c]	Superoxide-anion	O2
oaa[c]	Oxaloacetate	C4H2O5
occoa[c]	Octanoyl-CoA-n-C80CoA	C29H46N7O17P3S
ocdca[c]	octadecanoate-n-C180	C18H35O2
ocdca[e]	octadecanoate-n-C180	C18H35O2
ocdcea[c]	octadecenoate-n-C181	C18H33O2
octa[c]	octanoate-n-C80	C8H15O2
octdp[c]	all-trans-Octaprenyl-diphosphate	C40H65O7P2
odecoa[c]	Octadecenoyl-CoA-n-C181CoA	C39H64N7O17P3S
ohpb[c]	2-Oxo-3-hydroxy-4-phosphobutanoate	C4H4O8P
omdtria[c]	octa-methyl-dotriacontanoic-acid-C320-with-7-methyl-branches	C40H79O2
omtta[c]	octa-methyl-tetracontatricosanoic-acid-C340-8-methyl-branched-carbons	C42H83O2
orn[c]	Ornithine	C5H13N2O2
orn[e]	Ornithine	C5H13N2O2
orot5p[c]	Orotidine-5-phosphate	C10H10N2O11P
orot[c]	Orotate	C5H3N2O4
oxa[c]	Oxalate	C2O4
oxalcoa[c]	Oxalyl-CoA	C23H31N7O19P3S
pa160190[c]	1-2-sn-glycerol-3-phosphate	C38H73O8P
pa160[c]	1-2-dihexadecanoyl-sn-glycerol-3-phosphate	C35H67O8P1
pa190190[c]	1-2-sn-glycerol-3-phosphate	C41H79O8P
pac[c]	Phenylacetic-acid	C8H7O2
pac[e]	Phenylacetic-acid	C8H7O2
pacald[c]	Phenylacetaldehyde	C8H8O
palmACP[c]	Palmitoyl-ACP-n-C160ACP	C27H51N2O8PRS
pan4p[c]	Pantetheine-4-phosphate	C11H21N2O7PS
pant-R[c]	R-Pantoate	C6H11O4
pap[c]	Adenosine-3-5-bisphosphate	C10H11N5O10P2
paps[c]	3-Phosphoadenylyl-sulfate	C10H11N5O13P2S
pat[c]	penta-acyl-trehalose	C138H264O16
pdima[c]	phthiocerol-dimycocerosate-A-Mtb	C96H190O5
pdima[e]	phthiocerol-dimycocerosate-A-Mtb	C96H190O5
pdx5p[c]	Pyridoxine-5-phosphate	C8H10NO6P
pe160[c]	phosphatidylethanolamine-dihexadecanoyl-n-C160	C37H74N1O8P1
pe180[c]	phosphatidylethanolamine-dioctadecanoyl-n-C180	C41H82N1O8P1
peamn[c]	Phenethylamine	C8H12N
pep[c]	Phosphoenolpyruvate	C3H2O6P
peptido-EC[c]	Peptidoglycan-subunit-of-Escherichia-coli	C40H62N8O21
peptido-TB1[c]	peptidoglycan-subunit-for-Mycobacterium-tuberculosis	C39H63N8O19
peptido-TB2[c]	peptidoglycan-subunit-for-Mycobacterium-tuberculosis	C39H63N8O19
pg160190[c]	Phosphatidylglycerol-hexadecanoyl-methylstearoyl	C41H80O10P
pg160[c]	Phosphatidylglycerol-dihexadecanoyl-n-C160	C38H74O10P1
pg190[c]	Phosphatidylglycerol-dimethylstearoyl-C190	C44H86O10P
pgp160190[c]	Phosphatidylglycerophosphate-hexadecanoyl-tuberculostearoyl-C160-C190	C41H79O13P2
pgp160[c]	Phosphatidylglycerophosphate-dihexadecanoyl-n-C160	C38H73O13P2
pgp190[c]	Phosphatidylglycerophosphate-dituberculostearoyl-C190	C44H85O13P2
phdcaACP[c]	phenol-palmitic-acid-ACP	C34H57N2O9PRS
phdca[c]	phenol-palmitic-acid	C23H37O3
phdca[e]	phenol-palmitic-acid	C23H37O3
phdcacoa[c]	phenol-palmitic-coenzyme-A	C44H68N7O18P3S
phe-L[c]	L-Phenylalanine	C9H11NO2
phe-L[e]	L-Phenylalanine	C9H11NO2
pheme[c]	Protoheme	C34H30FeN4O4
phom[c]	O-Phospho-L-homoserine	C4H8NO6P
phpyr[c]	Phenylpyruvate	C9H7O3
phthcl[c]	phthiocol-oxidized	C11H8O3
phthclh2[c]	phthiocol-reduced	C11H10O3
phthdl[c]	phthiodolone	C31H62O3
phthiocerol[c]	phthiocerol-A	C32H66O3
phthr[c]	O-Phospho-4-hydroxy-L-threonine	C4H8NO7P
pi[c]	Phosphate	HO4P
pi[e]	Phosphate	HO4P
pmcoa[c]	Pimeloyl-CoA	C28H41N7O19P3S
pmhexc[c]	penta-methyl-hexacosanoate	C31H61O2
pmocta[c]	penta-methyl-octacosanoate	C33H65O2
pmtcoa[c]	Palmitoyl-CoA-n-C160CoA	C37H62N7O17P3S
pnto-R[c]	R-Pantothenate	C9H16NO5
ppa[c]	Propionate-n-C30	C3H5O2
ppa[e]	Propionate-n-C30	C3H5O2
ppal[c]	Propanal	C3H6O
ppbng[c]	Porphobilinogen	C10H13N2O4
ppcoa[c]	Propanoyl-CoA	C24H36N7O17P3S
ppdima[c]	phenol-phthiocerol-dimycocerosate-Mtb	C99H188O6
ppdima[e]	phenol-phthiocerol-dimycocerosate-Mtb	C99H188O6
pphn[c]	Prephenate	C10H8O6
pphthdl[c]	phenolic-phthiodiolone	C34H60O4
pphthiocerol[c]	phenolphtiocerol	C35H64O4
ppi[c]	Diphosphate	HO7P2
ppp9[c]	Protoporphyrin	C34H32N4O4
pppg9[c]	Protoporphyrinogen-IX	C34H38N4O4
pppi[c]	Inorganic-triphosphate	HO10P3
pram[c]	5-Phospho-beta-D-ribosylamine	C5H11NO7P
pran[c]	N-5-Phospho-D-ribosyl-anthranilate	C12H13NO9P
prbamp[c]	1-5-Phosphoribosyl-AMP	C15H19N5O14P2
prbatp[c]	1-5-Phosphoribosyl-ATP	C15H19N5O20P4
pre2[c]	Precorrin-2	C42H40N4O16
pre3a[c]	Precorrin-3-A	C43H43N4O16
pre3b[c]	Precorrin-3B	C43H44N4O17
pre4[c]	Precorrin-4	C44H44N4O17
pre5[c]	Precorrin-5	C45H46N4O17
pre6a[c]	Precorrin-6A	C44H47N4O16
pre6b[c]	Precorrin-6B	C44H49N4O16
pre8[c]	Precorrin-8	C45H53N4O14
prephthACP[c]	phthiocerol-precursor-bound-ACP	C43H81N2O11PRS
prephth[c]	phthiocerol-precursor	C32H61O5
prephthcoa[c]	phthiocerol-precursor-bound-coenzyme-A	C53H92N7O20P3S
prepphthACP[c]	phenolic-phthiocerol-precursor-bound-ACP	C46H79N2O12PRS
prepphth[c]	phenolic-phthiocerol-precursor	C35H59O6
prfp[c]	1-5-Phosphoribosyl-5-5-phosphoribosylamino-methylideneaminoimidazole-4-carboxamide	C15H21N5O15P2
prlp[c]	5-5-phospho-1-deoxyribulos-1-ylamino-methylideneamino-1-5-phosphoribosyl-imidazole-4-carboxamide	C15H21N5O15P2
pro-L[c]	L-Proline	C5H9NO2
pro-L[e]	L-Proline	C5H9NO2
prpp[c]	5-Phospho-alpha-D-ribose-1-diphosphate	C5H8O14P3
ps160[c]	phosphatidylserine-dihexadecanoyl-n-C160	C38H73N1O10P1
ps180[c]	phosphatidylserine-dioctadecanoyl-n-C180	C42H81N1O10P1
psd5p[c]	Pseudouridine-5-phosphate	C9H11N2O9P
pser-L[c]	O-Phospho-L-serine	C3H6NO6P
ptcys[c]	N-Pantothenoylcysteine	C12H21N2O6S
ptd1ino160190[c]	phosphatidyl-1D-myo-inositol-C160-C190	C44H84O13P
ptd1ino160[c]	phosphatidyl-1D-myo-inositol	C41H78O13P
ptrc[c]	Putrescine	C4H14N2
ptth[c]	Pantetheine	C11H22N2O4S
pyam5p[c]	Pyridoxamine-5-phosphate	C8H12N2O5P
pydam[c]	Pyridoxamine	C8H13N2O2
pydx5p[c]	Pyridoxal-5-phosphate	C8H8NO6P
pydx[c]	Pyridoxal	C8H9NO3
pydxn[c]	Pyridoxine	C8H11NO3
pyr[c]	Pyruvate	C3H3O3
pyr[e]	Pyruvate	C3H3O3
q8[c]	Ubiquinone-8	C49H74O4
q8h2[c]	Ubiquinol-8	C49H76O4
q[c]	Ubiquinone	C14H18O4
qh2[c]	Ubiquinol	C14H20O4
quln[c]	Quinolinate	C7H3NO4
r1p[c]	alpha-D-Ribose-1-phosphate	C5H9O8P
r5p[c]	alpha-D-Ribose-5-phosphate	C5H9O8P
ragund[c]	rhamanosyl-N-acetylglucosamyl-undecaprenyl-diphosphate	C69H113N1O16P2
rbl-D[c]	D-Ribulose	C5H10O5
rbl-L[c]	L-Ribulose	C5H10O5
rdmbzi[c]	N1-alpha-D-ribosyl-5-6-dimethylbenzimidazole	C14H18N2O4
rhcys[c]	S-Ribosyl-L-homocysteine	C9H17NO6S
rib-D[c]	D-Ribose	C5H10O5
rib-D[e]	D-Ribose	C5H10O5
ribflv[c]	Riboflavin	C17H20N4O6
rmyc[c]	mycolate-compounds-all	RMYC
rppdima[c]	rhamnose-phenol-phthiocerol-dimycocerosate-Mtb	C105H198O10
rrppdima[c]	rhamnose-rhamnose-phenol-phthiocerol-dimycocerosate-Mtb	C111H208O14
ru5p-D[c]	D-Ribulose-5-phosphate	C5H9O8P
ru5p-L[c]	L-Ribulose-5-phosphate	C5H9O8P
s7p[c]	Sedoheptulose-7-phosphate	C7H15O10P
s[c]	Sulfur	S
salc[c]	Salicylate	C7H5O3
sbzcoa[c]	O-Succinylbenzoyl-CoA	C32H39N7O20P3S
scl2[c]	sirohydrochlorin-2	C42H38N4O16
scl[c]	sirohydrochlorin	C42H39N4O16
sdhlam[c]	S-Succinyldihydrolipoamide	C12H20NO4S2
selcys[c]	Selenocysteine	C3H7NO2Se
seln[c]	Selenide	HSe
ser-D[c]	D-Serine	C3H7NO3
ser-D[e]	D-Serine	C3H7NO3
ser-L[c]	L-Serine	C3H7NO3
ser-L[e]	L-Serine	C3H7NO3
seramp[c]	L-seryl-AMP	C13H19N6O9P
sheme[c]	Siroheme	C42H36FeN4O16
skm5p[c]	Shikimate-5-phosphate	C7H8O8P
skm[c]	Shikimate	C7H9O5
skm[e]	Shikimate	C7H9O5
sl1[c]	sulfonated-tetra-acyl-trehalose	C149H287O18S
sl26da[c]	N-Succinyl-LL-2-6-diaminoheptanedioate	C11H16N2O7
sl2a6o[c]	N-Succinyl-2-L-amino-6-oxoheptanedioate	C11H12NO8
so3[c]	Sulfite	O3S
so4[c]	Sulfate	O4S
so4[e]	Sulfate	O4S
spmd[c]	Spermidine	C7H22N3
ssaltpp[c]	Succinate-semialdehyde-thiamin-diphosphate-anion	C16H21N4O10P2S
stcoa[c]	Stearoyl-CoA-n-C180CoA	C39H66N7O17P3S
sucarg[c]	N2-Succinyl-L-arginine	C10H17N4O5
sucbz[c]	o-Succinylbenzoate	C11H8O5
succ[c]	Succinate	C4H4O4
succ[e]	Succinate	C4H4O4
succoa[c]	Succinyl-CoA	C25H35N7O19P3S
sucglu[c]	N2-Succinyl-L-glutamate	C9H10NO7
sucgsa[c]	N2-Succinyl-L-glutamate-5-semialdehyde	C9H11NO6
suchms[c]	O-Succinyl-L-homoserine	C8H12NO6
sucorn[c]	N2-Succinyl-L-ornithine	C9H15N2O5
sucsal[c]	Succinic-semialdehyde	C4H5O3
tamhexc[c]	tetra-methyl-hexacosanoate	C30H59O2
tamlgnc[c]	tri-methyl-lignoceric-acid	C28H55O2
tamocta[c]	tetra-methyl-octacosanoate	C32H63O2
tarab-D[c]	tetra-arabinofuranoside	C20H34O17
tartr-L[c]	L-tartrate	C4H4O6
tartr-L[e]	L-tartrate	C4H4O6
tat[c]	tetra-acyl-trehalose	C149H288O15
taur[c]	Taurine	C2H7NO3S
tcynt[c]	Thiocyanate	CNS
tdcoa[c]	Tetradecanoyl-CoA-n-C140CoA	C35H58N7O17P3S
tdm1[c]	trehalose-dimycolate-alpha-mycolate-methoxymycolate	C174H332O15
tdm2[c]	trehalose-dimycolate-alpha-mycolate-methoxymycolate	C174H334O16
tdm3[c]	trehalose-dimycolate-alpha-mycolate-ketomycolate	C176H338O16
tdm4[c]	trehalose-dimycolate-alpha-mycolate-methoxymycolate	C176H336O15
thdp[c]	2-3-4-5-Tetrahydrodipicolinate	C7H7NO4
thf[c]	5-6-7-8-Tetrahydrofolate	C19H21N7O6
thfglu[c]	Tetrahydrofolyl-Glu-2	C24H27N8O9
thm[c]	Thiamin	C12H17N4OS
thmmp[c]	Thiamin-monophosphate	C12H16N4O4PS
thmpp[c]	Thiamine-diphosphate	C12H16N4O7P2S
thr-L[c]	L-Threonine	C4H9NO3
thr-L[e]	L-Threonine	C4H9NO3
thym[c]	Thymine	C5H6N2O2
thymd[c]	Thymidine	C10H14N2O5
tmbhn[c]	tri-methyl-behenic-acid	C25H49O2
tmha1[c]	tetramycolyl-hexaarabinoside-tdm1-tdm2-tre--Mtb	C360H684O40
tmha2[c]	tetramycolyl-hexaarabinoside-tdm1-tdm3-tre--Mtb	C362H688O40
tmha3[c]	tetramycolyl-hexaarabinoside-tdm1-tdm4-tre--Mtb	C362H686O39
tmha4[c]	tetramycolyl-hexaarabinoside-tdm2-tdm3-tre--Mtb	C362H690O41
tmha5[c]	tetramycolyl-hexaarabinoside-tdm2-tdm4-tre--Mtb	C362H688O40
tmha6[c]	tetramycolyl-hexaarabinoside-tdm3-tdm4-tre--Mtb	C364H692O40
tmhexc[c]	tri-methyl-hexacosanoate	C29H57O2
tmlgnc[c]	tri-methyl-lignoceric-acid	C27H53O2
trdox[c]	Oxidized-thioredoxin	X
trdrd[c]	Reduced-thioredoxin	XH2
tre6p[c]	alpha-alpha-Trehalose-6-phosphate	C12H21O14P
tre[c]	Trehalose	C12H22O11
tre[e]	Trehalose	C12H22O11
tres[c]	trehalose-2-sulfate	C12H21O14S
triat[c]	tri-acyl-trehalose	C75H142O14
trnaala[c]	tRNA-Ala	R
trnaglu[c]	tRNA-Glu	R
trp-L[c]	L-Tryptophan	C11H12N2O2
trp-L[e]	L-Tryptophan	C11H12N2O2
tsul[c]	Thiosulfate	O3S2
tsul[e]	Thiosulfate	O3S2
ttc[c]	tetracosanoate-n-C240	C24H47O2
ttdca[c]	tetradecanoate-n-C140	C14H27O2
ttdca[e]	tetradecanoate-n-C140	C14H27O2
tyr-L[c]	L-Tyrosine	C9H11NO3
tyr-L[e]	L-Tyrosine	C9H11NO3
uAgl[c]	UDP-N-acetylmuramoyl-L-alanyl-D-glutamyl-L-lysine	C34H52N7O24P2
uAgla[c]	UDP-N-acetylmuramoyl-L-alanyl-D-glutamyl-L-lysyl-D-alanyl-D-alanine	C40H62N9O26P2
uGgl[c]	UDP-N-acetylmuramoyl-L-alanyl-gamma-D-glutamyl-L-lysine	C34H52N7O24P2
uGgla[c]	UDP-N-acetylmuramoyl-L-alanyl-gamma-D-glutamyl-L-lysyl-D-alanyl-D-alanine	C40H62N9O26P2
uaAgla[c]	Undecaprenyl-diphospho-N-acetylmuramoyl-L-alanyl-D-glutamyl-L-lysyl-D-alanyl-D-alanine	C86H140N7O21P2
uaGgla[c]	Undecaprenyl-diphospho-N-acetylmuramoyl-L-alanyl-gamma-D-glutamyl-L-lysyl-D-alanyl-D-alanine	C86H140N7O21P2
uaaAgla[c]	Undecaprenyl-diphospho-N-acetylmuramoyl-N-acetylglucosamine-L-alanyl-D-glutamyl-L-lysyl-D-alanyl-D-alanine	C94H153N8O26P2
uaaAgtla[c]	Undecaprenyl-diphospho-N-acetylmuramoyl-N-acetylglucosamine-L-alanyl-D-glutaminyl-L-lysyl-D-alanyl-D-alanine	C94H155N9O25P2
uaaGgla[c]	Undecaprenyl-diphospho-N-acetylmuramoyl-N-acetylglucosamine-L-alanyl-gamma-D-glutamyl-L-lysyl-D-alanyl-D-alanine	C94H153N8O26P2
uaaGgtla[c]	Undecaprenyl-diphospho-N-acetylmuramoyl-N-acetylglucosamine-L-alanyl-D-isoglutaminyl-L-lysyl-D-alanyl-D-alanine	C94H155N9O25P2
uaagmda[c]	Undecaprenyl-diphospho-N-acetylmuramoyl-N-acetylglucosamine-L-ala-D-glu-meso-2-6-diaminopimeloyl-D-ala-D-ala	C95H152N8O28P2
uaagtmda[c]	Undecaprenyl-diphospho-N-acetylmuramoyl-N-acetylglucosamine-L-alanyl-D-glutaminyl-meso-2-6-diaminopimeloyl-D-alanyl-D-alanine	C95H154N9O27P2
uaccg[c]	UDP-N-acetyl-3-O-1-carboxyvinyl-D-glucosamine	C20H26N3O19P2
uacgam[c]	UDP-N-acetyl-D-glucosamine	C17H25N3O17P2
uagmda[c]	Undecaprenyl-diphospho-N-acetylmuramoyl-L-alanyl-D-glutamyl-meso-2-6-diaminopimeloyl-D-alanyl-D-alanine	C87H139N7O23P2
uama[c]	UDP-N-acetylmuramoyl-L-alanine	C23H33N4O20P2
uamag[c]	UDP-N-acetylmuramoyl-L-alanyl-D-glutamate	C28H39N5O23P2
uamr[c]	UDP-N-acetylmuramate	C20H28N3O19P2
udcpdp[c]	Undecaprenyl-diphosphate	C55H89O7P2
udcpp[c]	Undecaprenyl-phosphate	C55H89O4P
udp[c]	UDP	C9H11N2O12P2
udpg[c]	UDPglucose	C15H22N2O17P2
udpgal[c]	UDPgalactose	C15H22N2O17P2
udpgalfur[c]	UDP-D-galacto-1-4-furanose	C15H22N2O17P2
udpglcur[c]	UDP-D-glucuronate	C15H19N2O18P2
ugagmda[c]	Undecaprenyl-diphospho-N-glycolylmuramoyl-N-acetylglucosamine-L-ala-D-glu-meso-2-6-diaminopimeloyl-D-ala-D-ala	C95H152N8O29P2
ugggmda[c]	Undecaprenyl-diphospho-N-glycolylmuramoyl-L-alanyl-D-glutamyl-meso-2-6-diaminopimeloyl-D-alanyl-D-alanine	C87H139N7O24P2
uggmd[c]	UDP-N-glycolylmuramoyl-L-alanyl-D-gamma-glutamyl-meso-2-6-diaminopimelate	C35H51N7O27P2
uggmda[c]	UDP-N-glycolylmuramoyl-L-alanyl-D-glutamyl-meso-2-6-diaminopimeloyl-D-alanyl-D-alanine	C41H61N9O29P2
ugma[c]	UDP-N-glycolylmuramoyl-L-alanine	C23H33N4O21P2
ugmag[c]	UDP-N-glycolylmuramoyl-L-alanyl-D-glutamate	C28H39N5O24P2
ugmd[c]	UDP-N-acetylmuramoyl-L-alanyl-D-gamma-glutamyl-meso-2-6-diaminopimelate	C35H51N7O26P2
ugmda[c]	UDP-N-acetylmuramoyl-L-alanyl-D-glutamyl-meso-2-6-diaminopimeloyl-D-alanyl-D-alanine	C41H61N9O28P2
ugmr[c]	UDP-N-glycolylmuramate	C20H28N3O20P2
ump[c]	UMP	C9H11N2O9P
unaga[c]	Undecaprenyl-diphospho-N-acetyl-glucosamine	C63H103NO12P2
uppg1[c]	Uroporphyrinogen-I	C40H36N4O16
uppg3[c]	Uroporphyrinogen-III	C40H36N4O16
ura[c]	Uracil	C4H4N2O2
urea[c]	Urea	CH4N2O
uri[c]	Uridine	C9H12N2O6
utp[c]	UTP	C9H11N2O15P3
val-L[c]	L-Valine	C5H11NO2
val-L[e]	L-Valine	C5H11NO2
xan[c]	Xanthine	C5H4N4O2
xmp[c]	Xanthosine-5-phosphate	C10H11N4O9P
xtsn[c]	Xanthosine	C10H12N4O6
xu5p-D[c]	D-Xylulose-5-phosphate	C5H9O8P
xyl-D[c]	D-Xylose	C5H10O5
xyl-D[e]	D-Xylose	C5H10O5
xylu-D[c]	D-Xylulose	C5H10O5
gmhep7p[c]	D-glycero-alpha-beta-D-manno-heptose 7-Phosphate	C7H15O10P
gmhep17bp[c]	D-glycero-alpha-D-manno-heptose 1-7-bisphosphate	C7H16O13P2
gmhep1p[c]	D-glycero-alpha-D-manno-heptose 1-Phosphate	C7H15O10P
gamgdp-D[c]	GDP-D-glycero-alpha-D-manno-heptose	C17H27N5O17P2
gbmh17p-D[c]	D-glycero-beta-D-manno-heptose 1-7-bisphosphate	C7H16O13P2
gbmh1p-D[c]	D-glycero-beta-D-manno-heptose 1-Phosphate	C7H15O10P
adphep-DD[c]	ADP-D-glycero-beta-D-manno-heptose	C17H27N5O16P2
adphep-LD[c]	ADP-L-glycero-beta-D-manno-heptose	C17H27N5O16P2
u1c[c]	Urea-1-carboxylate	C2H4N2O3
hmbpp[c]	E-4-Hydroxy-3-Methyl-but-2-enyl-pyrophosphate	C5H12O8P2
ggdp[c]	Geranylgeranyl diphosphate	C20H36O7P2
ptdp[c]	All trans-pentaprenyl-diphosphate	C25H44O7P2
hpdp[c]	All trans-hexaprenyl-diphosphate	C30H52O7P2
htdp[c]	All trans-heptaprenyl-diphosphate	C35H60O7P2
gdpdp[c]	Guanosine-5-diphosphate-3-diphosphate	C10H17N5O17P4
2mcit[c]	2-methylcitrate	C7H7O7
2mcacn[c]	cis-2-methylaconitate	C7H5O6
micit[c]	Methylisocitrate	C7H7O7
adprib[c]	ADP-ribose	C15H21N5O14P2
dad-5[c]	5-Deoxyadenosine	C10H13N5O3
thrp[c]	L-Threonine O-3-phosphate	C4H8NO6P
ni2[e]	nickel	Ni
ni2[c]	nickel	Ni
mn2[e]	manganese	Mn
mn2[c]	manganese	Mn
mob[e]	molybdate	MoO4
mob[c]	molybdate	MoO4
2h24pdn[c]	2-Hydroxy-2,4-pentadienoate	C5H6O3
2plac-L[c]	2-phospho-L-lactate	C3H4O6P
lppg[c]	Lactyl-2-diphospho-5-guanosine	C13H16N5O13P2
fo[c]	7,8-didemethyl-8-hydroxy-5-deazariboflavin	C16H17N3O7
5a6rac[c]	5-amino-6-(D-ribitylamino)uracil	C9H16N4O6
f420-0[c]	Factor F420-0	C19H20N3O12P
f420-1[c]	Factor F420-1	C24H26N4O15P
f420-2[c]	Factor F420-2 (oxidized)	C29H32N5O18P
f420-2h2[c]	Factor F420-2 (reduced)	C29H34N5O18P
f420-3[c]	Factor F420-3	C34H38N6O21P
f420-4[c]	Factor F420-4	C39H44N7O24P
f420-5[c]	Factor F420-5	C44H50N8O27P
cpmp[c]	Precursor-Z	C10H13N5O8P
mobpt[c]	Molybdopterin	C10H11N5O6PS2
mobptamp[c]	Molybdopterin-AMP	C20H24N10O12P2S2
moco[c]	Molybdenum cofactor	C10H10N5O8PS2Mo
mgd[c]	Molybdopterin guanine dinucleotide	C20H24N10O15P2S2Mo
MoaD[c]	Molybdenum cofactor biosynthesis protein D
MoaD-AMP[c]	Molybdenum cofactor biosynthesis protein D-AMP
MoaD-SH[c]	Molybdenum cofactor biosynthesis protein D-SH
octscoa[c]	Octacosanoyl-CoA
hexscoa[c]	Hexacosanoyl-CoA
tetscoa[c]	Tetracosanoyl-CoA
doscoa[c]	Docosanoyl-CoA
eiscoa[c]	Eicosanoyl-CoA
octdcoa[c]	Octadecanoyl-CoA
hexdcoa[c]	Hexadecanoyl-CoA
dodcoa[c]	Dodecanoyl-CoA
decoa[c]	Decanoyl-CoA
hexcoa[c]	Hexanoyl-CoA
butcoa[c]	Butanoyl-CoA
c5tetdcoa[c]	cis-delta-5-tetradecanoyl-CoA
c3dodcoa[c]	cis-delta-3-dodecanoyl-CoA
t2dodcoa[c]	trans-delta-2-dodecanoyl-CoA
d2hdodcoa[c]	trans-delta-2-hydroxy-dodecanoyl-CoA
nodcoa[c]	Nonadecanoyl-CoA
hepdcoa[c]	Heptadecanoyl-CoA
pentdcoa[c]	Pentadecanoyl-CoA
tridcoa[c]	Tridecanoyl-CoA
undcoa[c]	Undecanoyl-CoA
nocoa[c]	Nonanoyl-CoA
hepcoa[c]	Heptanoyl-CoA
pentcoa[c]	Pentanoyl-CoA	C26H44N7O17P3S
3hmp[c]	3-hydroxy-2-methylpropanoate	C4H8O3
5mdr1p[c]	5-Methylthio-5-deoxy-D-ribose 1-phosphate	C6H11O7PS
arabl-D[c]	D-Arabinitol	C5H10O5
LM[c]	Lipomannan
LAM[c]	Lipoarabinomannan
ManLAM[c]	Mannose-capped Lipoarabinomannan
hoa[c]	2-hydroxy-3-oxoadipate	C6H8O6
mthgxl[c]	methylglyoxal	C3H4O2
lgt-s[c]	Lactoylglutathione	C13H21N3O8S

## Sheet: Table.S1(C)
Model Genes	Literature Evidence
Rv0013	PMID: 16508110; PMID: 18952181
Rv0016c	PMID: 16436437
Rv0021c	PMID: 16682407 ; BLAST
Rv0032	PMID: 16769720
Rv0041	PMID: 2203971; PMID: 10673435; PMID: 8274143; PMID: 1852601; PMID: 2053131;PMID:19664275
Rv0046c	PMID: 19389781
Rv0066c	PMID: 19052369
Rv0069c	PMID: 16269752
Rv0070c	PMID: 12913008
Rv0072	PMID: 20429878 ;PMID:10978546; PMID: 16077135
Rv0073	PMID:10978546
Rv0075	PMID: 15471546
Rv0082	PMID: 17655757
Rv0084	PMID: 10559152;PMID: 9387241
Rv0085	PMID: 20062806;PMID: 19664275
Rv0087	PMID: 10940377
Rv0091	PMID: 17115689
Rv0092	PMID: 11677622; PMID: 14692449; BRENDA
Rv0097	PMID: 9287300; PMId: 17524985 http://pfam.sanger.ac.uk/family/PF02668.9
Rv0098	PMID: 17524985
Rv0099	PMID: 19182784 ; PMID: 17524985 ; PMID 17028284
Rv0103c	PMID: 11677622; PMID: 14692449; BRENDA
Rv0107c	PMID: 16573683 ;PMID:9419228
Rv0112	PMID: 18390543;PMID: 18458127
Rv0113	PMID: 12101286
Rv0114	PMID: 12101286
Rv0115	PMID: 11279237; PMID: 12101286; PMID: 16030223
Rv0118c	PMID: 16216870
Rv0121c	PMID: 12824491
Rv0126	PMID: 20305657
Rv0131c	PMID: 11812788; PMID: 9214289; PMID: 11872165
Rv0132c	PMID: 18434308
Rv0137c	PMID:11481433
Rv0143c	PMID: 11282970
Rv0147	PMID: 18110463
Rv0154c	PMID: 9535763
Rv0155	PMID: 3525165
Rv0156	PMID: 3525165
Rv0157	PMID: 3525165
Rv0162c	PMID: 2936267; BRENDA
Rv0183	PMID:17784850; PMID: 18309478
Rv0189c	PMID: 18584054
Rv0191	PMID: 12520088
Rv0211	PMID: 16691317 ; PMID: 19820096
Rv0215c	PMID: 18547663
Rv0222	PMID: 12467702
Rv0223c	PMID: 19911309
Rv0231	PMID: 11514662;PMID: 12480891;BLAST
Rv0234c	PMID: 16027371
Rv0243	PMID: 14595687; BRENDA
Rv0244c	PMID: 12953091
Rv0247c	PMID: 20062806 ; http://books.google.co.in/books?hl=en&lr=&id=2UFkCKT6K8sC&oi=fnd&pg=PA35&dq=Rv0248c&ots=zd9KIEvjwe&sig=42iwhrPU8BI2Zpwt2yGBOawgkuI#v=onepage&q=Rv0248c&f=false
Rv0248c	PMID: 15883782; PMID: 20062806 ; PMID: 3722123
Rv0252	PMID: 19332834; PMID: 18824837
Rv0253	PMID: 19332834
Rv0254c	PMID: 15939305; PMID: 10869342; PMID: 10529169; PMID: 9601028; PMID: 7559521
Rv0255c	PMID: 1655697; PMID: 10966576, BRENDA
Rv0260c	PMID: 18651750; PMID: 12177321
Rv0261c	PMID: 14645286
Rv0263c	PMID: 17906132; PMID: 16103351
Rv0264c	http://pfam.sanger.ac.uk/protein?id=P95221; PMID: 15796980
Rv0266c	PMID: 2868393
Rv0267	PMID: 14645286
Rv0271c	PMID: 19710090
Rv0295c	PMID: 15205418
Rv0317c	PMID: 17064286; PMID: 10760272; PMID: 17690467
Rv0321	PMID: 10827956; PMID: 234434; PMID: 18164314
Rv0322	PMID: 10675895
Rv0334	PMID: 9084178; PMID: 11302803; PMID: 9692181
Rv0337c	PMID: 15471546
Rv0346c	PMID: 16885415
Rv0357c	http://www.ncbi.nlm.nih.gov/bookshelf/br.fcgi?book=sef&part=A371; PMID:19635450; PMID: 10417315
Rv0363c	PMID: 19167403
Rv0373c	PMID: 18400743
Rv0374c	PMID: 18400743
Rv0375c	PMID: 18400743
Rv0382c	PMID: 2191077
Rv0386	PMID: 19516256
Rv0389	PMID: 18712276
Rv0390	PMID: 8702871 ; http://pfam.sanger.ac.uk/family/Rhodanese
Rv0391	PMID: 15576367
Rv0392c	PMID: 15767566 ; PMID: 15995221
Rv0400c	PMID: 9535763;PMID: 15353557
Rv0407	PMID: 18434308 ; PMID: 9555906
Rv0408	PMID: 11292814;PMID: 3075652 ; PMID: 7606663 ; PMID: 16739977
Rv0409	PMID: 7606663 ; PMID: 16080684 ; PMID: 16077135;PMID: 8394314
Rv0411c	PMID: 16262797 ; PMID: 15186418
Rv0414c	PMID: 6986359;PMID: 16213791 ; PMID: 8394314
Rv0417	PMID: 10382260; PMID: 8432721
Rv0422c	PMID: 10382260; http://mic.sgmjournals.org/cgi/reprint/145/2/495
Rv0423c	PMID: 10382260; PMID: 9371431
Rv0432	PMID: 11447176
Rv0436c	PMID: 10889206; PMID: 8244943
Rv0437c	PMID: 10889206; PMID: 8244943
Rv0456c	PMID: 12467702; PMID: 17240207
Rv0458	PMID: 10407263
Rv0462	PMID: 11560483, PMID: 11799204
Rv0464c	PMID: 19767422
Rv0467	PMID: 18275086 ; PMID: 10572116
Rv0468	PMID: 20378648;PMID: 1444364 ; PMID: 14702306
Rv0470c	PMID: 11756461; BRENDA
Rv0478	PMID: 12438350 ; PMID: 12467706;http://pubs.acs.org/doi/abs/10.1021/ja00028a050
Rv0482	PMID: 20614148;PMID: 11722747
Rv0486	PMID: 18772286
Rv0489	PMID: 15735341
Rv0496	PMID: 19304823;BLAST; PMID: 15863650
Rv0498	PMID: 19578178; BLAST; PMID: 8801434
Rv0499	BLAST; PMID: 16689792
Rv0500	PMID: 20091669 ; PMID: 16199181
Rv0501	PMID: 9692181
Rv0503c	PMID: 10882107; PMID: 11092877; PMID: 11756461; PMID: 7592990
Rv0505c	PMID: 12051918
Rv0509	PMID: 15757895;PMID: 19187240 ;http://air.unimi.it/handle/2434/63563
Rv0510	PMID: 12555854
Rv0511	PMID: 19332811
Rv0512	PMID: 4998716;PMID: 12196142 ; PMID: 19332811;PMID: 20583792
Rv0522	PMID: 16788192;PMID: 10648515
Rv0524	PMID: 2045363
Rv0533c	PMID: 11600501; PMID: 10840036; PMID: 15713483; PMID: 18420147; PMID: 19968566; PMID: 19074144; PMID: 11278743;http://digarchive.library.vcu.edu/dspace/bitstream/10156/2143/1/sachdevas_phd.pdf; PMID: 17555433
Rv0534c	PMID: 19275719;PMID: 12909628
Rv0536	PMID: 9692181
Rv0542c	PMID: 18762421;PMID: 12909628
Rv0545c	PMID: 20003273
Rv0548c	PMID: 12909628
Rv0553	PMID: 12909628 ;PMID: 10194342;PMID: 6754698
Rv0555	PMID: 16511076; PMID: 16027371; PMID: 6127606
Rv0557	PMID: 18178556; PMID: 17179146
Rv0558	PMID: 12837779; PMID: 16131752; PMID: 9139683
Rv0562	PMID: 15528667; BRENDA
Rv0564c	PMID: 4959723
Rv0570	PMID: 14573627; PMID: 17918768; PMID: 11875520
Rv0573c	PMID: 18490451; PMID: 10506999
Rv0577	PMID: 14987776
Rv0618	PMID: 12923184; PMID: 10820011
Rv0619	PMID: 12923184; PMID: 10820011
Rv0620	PMID: 12923184; PMID: 9603808; PMID: 12796487
Rv0632c	PMID: 7451405
Rv0642c	PMID: 15653820; PMID: 11756461; PMID: 16213523
Rv0644c	PMID: 15653820; PMID: 11756461; PMID: 16213523
Rv0645c	PMID: 15653820; PMID: 11756461; PMID: 16213523
Rv0649	PMID: 17604051 ; PMID: 16112872
Rv0650	PMID: 17183214;PMID: 17557815
Rv0672	PMID: 9535763;BLAST;BRENDA
Rv0673	PMID: 12467702; PMID: 5057465; PMID: 9634230
Rv0675	PMID: 12467702; PMID: 5057465; PMID: 9634230
Rv0684	PMID: 17996252 ; http://www.bmb.leeds.ac.uk/illingworth/motors/factor.htm
Rv0694	PMID: 10483724; PMID: 19429617; BRENDA
Rv0727c	PMID: 10821675 ; PMID: 8515438
Rv0728c	PMID: 18627175 ; PMID: 15668249; PMID: 18799456
Rv0729	PMID: 17123542 ; PMID: 11818558
Rv0733	PMID: 16672241
Rv0751c	PMID: 19924887; BRENDA; PMID: 18022770
Rv0752c	PMID: 18022770
Rv0753c	PMID: 16332250; PMID: 15272169; PMID: 16513384
Rv0763c	PMID: 17073780; PMID: 12235134; PMID: 16819841; PMID: 19846551; PMID: 10430874; PMID: 17482138
Rv0768	PMID: 10735862
Rv0771	PMID: 9495744
Rv0772	PMID: 2687276; PMID: 3328771
Rv0773c	PMID: 16452418
Rv0777	PMID: 18712276; PMID: 10673438
Rv0780	PMID: 18712276; PMID: 9551557; PMID: 16582479; PMID: 16687397
Rv0788	PMID: 18712276; PMID: 1859748
Rv0794c	PMID: 16045627
Rv0803	PMID: 18712276; PMID: 1859748
Rv0805	PMID: 19801656; PMID: 17059828; PMID: 16313172
Rv0806c	PMID: 8931134 ; PMID: 18667419
Rv0808	PMID: 18712276; PMID: 6794613; PMID: 7532005
Rv0809	PMID: 10508786; PMID: 18997321
Rv0811c	PMID: 11888165; PMID: 16051266
Rv0812	http://informahealthcare.com/doi/pdf/10.1517/17460441.3.5.565 ; PMID: 1644759
Rv0819	PMID: 12375100; PMID: 12930994; PMID: 16923891
Rv0820	PMID: 16438679
Rv0824c	PMID: 15929999 ; BRENDA
Rv0843	BLAST; PFAM; PMID: 16093239 ; http://www.enzyme-database.org/newenz.php
Rv0848	PMID: 17567578
Rv0853c	PMID: 18086676; BRENDA
Rv0855	PMID:16511223; PMID:15632186; PMID:12554951
Rv0858c	PMID: 16880560
Rv0859	PMID: 20378648; PMID: 20066036
Rv0860	PMID: 11882714; BRENDA
Rv0864	PMID: 15269205
Rv0865	PMID: 15269205
Rv0866	PMID: 15269205; PMID: 17384187
Rv0868c	PMID: 19946146; http://pfam.sanger.ac.uk/family/PF02597.13 ;PMID: 10781607
Rv0869c	PMID: 18307109; PMID 11222759; PMID 15317939; PMID 16632608
Rv0873	PMID: 15353557
Rv0884c	PMID: 18799456; PMID: 16267303
Rv0886	PMID: 19376862
Rv0889c	PMID: 11325948; PMID: 17897060
Rv0896	PMID:17028777
Rv0904c	PMID: 15308633
Rv0905	PMID: 12467702; PMID: 15525680; PMID: 15840709; PMID: 14557599
Rv0911	PMID: 14638775; PMID: 16740934; PMID: 7481800; BLAST
Rv0924c	PMID:9719491; PMID: 9632246; PMID: 9360964; PMID: 8928221; PMID 7479731
Rv0936	PMID: 8112854
Rv0946c	PMID: 17126561 ; PMID: 16212940
Rv0948c	PMID: 17965159; PMID: 18727669
Rv0951	PMID: 10625475 ; PMID: 16445752 ; PMID: 2548486
Rv0952	PMID: 10625475 ; PMID: 16445752 ; PMID: 2548486
Rv0956	PMID: 19394344 ;PMID: 18712276 ; PMID: 8501063
Rv0957	PMID: 18712276 ; PMID: 11323713 ; PMID: 11457277
Rv0958	PMID: 18790730
Rv0971c	PMID: 15653820
Rv0972c	PMID: 12480891
Rv0973c	PMID: 17157300
Rv0974c	PMID: 17157300
Rv0975c	PMID: 12480891
Rv0989c	PMID: 11004176
Rv0992c	PMID: 18022770
Rv0993	PMID: 18621545
Rv0994	PMID: 17198377, http://pfam.sanger.ac.uk//family/PF03453
Rv1001	PMID: 18032107; PMID: 10648515
Rv1005c	PMID: 11495989
Rv1007c	PMID: 9607323
Rv1011	PMID: 17921290; PMID: 20064433; PMID: 18793870
Rv1017c	PMID: 17259624 ; PMID: 10954724
Rv1018c	PMID: 18573680; PMID: 19121323
Rv1023	PMID: 14746912
Rv1026	PMID: 15247240; PMID: 6130093
Rv1029	PMID: 17536175
Rv1030	PMID: 17536175
Rv1031	PMID: 11248697; PMID: 9858692
Rv1070c	PMID: 17240207
Rv1071c	PMID: 17240207
Rv1074c	0
Rv1077	PMID: 15716431
Rv1079	PMID: 15576367; Brenda
Rv1082	PMID: 15342574 ; PMID: 10978158 ; PMID: 11092856
Rv1086	PMID: 10816587
Rv1092c	PMID: 16699190; PMID: 16508093; BRENDA
Rv1093	PMID: 12913008 ; BRENDA
Rv1094	PMID: 15929999
Rv1098c	PMID: 16501059
Rv1099c	PMID: 15470127
Rv1110	PMID: 11818558 ; PMID: 11004185 ; PMID: 12198182
Rv1120c	PMID:16730005; http://pauling.mbu.iisc.ernet.in/065.pdf
Rv1121	PMID: 13252007
Rv1122	PMID: 17222187
Rv1127c	PMID: 5144757
Rv1130	PMID: 12473114 ; PMID: 18048912
Rv1131	PMID: 9579066 ; PMID: 18048912
Rv1133c	PMID: 15326182 ; PMID: 15630480
Rv1141c	PMID: 15653820
Rv1142c	PMID: 12467702
Rv1144	PMID: 12010964; PMID: 521433
Rv1155	PMID: 16239726
Rv1159	PMID: 16803893
Rv1160	http://pfam.sanger.ac.uk/family/PF00293.21, PMID: 19115962
Rv1161	PMID: 14645286;PMID: 12843072
Rv1162	PMID: 14645286;PMID: 12843072
Rv1163	PMID: 14645286;PMID: 12843072
Rv1164	PMID: 14645286;PMID: 12843072
Rv1166	http://pfam.sanger.ac.uk/family/PF00496.15;PMID: 16511240; PMID: 16455649; PMID: 17322184; PMID: 18344361
Rv1170	PMID: 12958317
Rv1173	PMID: 11948155
Rv1178	PMID: 17292400
Rv1185c	PMID: 19182784 ; BRENDA
Rv1187	PMID: 12540586; PMID: 18032107
Rv1188	PMID: 17536821
Rv1200	PMID: 17557815 ; PMID: 9529885 ; http://pfam.sanger.ac.uk//family/PF00083.17
Rv1201c	PMID: 19394346 ; PMID: 18765924
Rv1202	PMID: 20138056
Rv1207	PMID: 18680522
Rv1213	PMID: 18808383
Rv1236	PMID: 17555602; PMID: 14569030; PMID: 15928073
Rv1237	PMID: 17555602; PMID: 14569030; PMID: 15928073
Rv1238	PMID: 17557815; PMID: 17555602; PMID: 14569030; PMID: 15928073
Rv1239c	PMID: 19346249
Rv1240	PMID: 7849603; PMID:922015; PMID: 12379701
Rv1248c	PMID: 16027371; PMID: 10781553
Rv1257c	PMID: 15683236
Rv1264	PMID: 17482646; PMID:15890882; PMID:11839758; PMID:12829712; PMID:16730005
Rv1280c	PMID:10639400; PMID: 10978546; PMID: 16452418; PMID: 19671666
Rv1281c	PMID:10639400; PMID: 10978546; PMID: 16452418; PMID: 19671666
Rv1282c	PMID:10639400; PMID: 10978546; PMID: 16452418; PMID: 19671666
Rv1283c	PMID:10639400; PMID: 10978546; PMID: 16452418; PMID: 19671666
Rv1284	PMID: 19317447; PMID: 15753099; PMID: 19651511;PMID: 16321983
Rv1285	PMID: 17970225; PMID: 15184554
Rv1286	PMID: 9786849; PMID: 15184554
Rv1292	PMID: 12325364
Rv1293	PMID: 12637582; PMID: 16511157; PMID: 19543810
Rv1294	PMID: 10700284
Rv1295	PMID: 18621388
Rv1296	PMID: 10700284
Rv1302	PMID: 17956343
Rv1304	PMID:16045926; PMID: 15353557; PMID: 17387738
Rv1305	PMID:16045926; PMID: 15353557; PMID: 17387738; PMID: 18625705
Rv1306	PMID:15078220;PMID:16045926, PMID: 15353557; PMID: 17387738; PMID: 18625705
Rv1307	PMID: 16077011; PMID: 18625705
Rv1308	PMID: 16077011; PMID: 18625705
Rv1309	PMID: 16077011; PMID: 18625705
Rv1310	PMID: 16077011; PMID: 18625705
Rv1311	PMID: 20038615;PMID: 18625705
Rv1314c	PMID: 19413290 ; http://pfam.sanger.ac.uk/family/Cob_adeno_trans
Rv1315	PMID: 11555614
Rv1318c	PMID: 15182360
Rv1319c	PMID: 15182360
Rv1320c	PMID: 15182360
Rv1322A	PMID: 18375549
Rv1323	PMID: 12010964; PMID: 19389781; BRENDA
Rv1326c	PMID: 19121228
Rv1328	PMID: 18808383; PMID: 10821190; PMID: 19202084; PMID: 17261566
Rv1330c	PMID: 18490451
Rv1336	PMID: 18842002; PMID: 18771296; PMID: 18799456; PMID: 16104727; PMID: 19101553
Rv1338	PMID: 17020913
Rv1346	PMID: 12065475
Rv1347c	PMID: 15695811 ; PMID 16461464
Rv1348	PMID: 19948799 ;PMID: 16385031 ; PMID: 10978546
Rv1349	PMID: 16385031
Rv1350	PMID: 17059223
Rv1373	PMID: 11882713
Rv1379	PMID: 15805589; PMID: 17601781
Rv1380	PMID: 3342242; PMID:13319326;PMID: 17601781
Rv1381	PMID: 15610022; PMID: 13163076
Rv1383	PMID: 16096274
Rv1384	PMID: 16096274
Rv1385	PMID: 11526316
Rv1389	PMID: 17142284 ; BRENDA
Rv1391	PMID: 12140293
Rv1392	PMID: 12809568
Rv1406	PMID:8432722;PMID:12549912;PMID:9391059
Rv1408	PMID: 18422659; PMID: 9733539
Rv1409	PMID: 9068650; PMID: 30756
Rv1412	PMID: 17696548; PMID: 20148904
Rv1415	PMID: 11342130
Rv1416	PMID: 17696548; PMID: 15723519; PMID: 16984393; PMID: 12153285
Rv1436	PMID: 10702355; http://circle.ubc.ca/bitstream/handle/2429/693/ubc_2008_spring_lee_guinevere.pdf?sequence=1
Rv1437	PMID: 15057575; PMID: 4362687
Rv1438	PMID: 16978361
Rv1445c	PMID: 14532352;PMID: 4902810
Rv1447c	PMID: 13252007; PMID: 13729473
Rv1448c	PMID: 8616240;PMID:20662102;PMID:19878316
Rv1449c	PMID: 11601619;PMID:17443846;PMID:11601619;PMID:10537214;PMID:10947854;PMID:9482846
Rv1451	PMID: 14654685
Rv1464	PMID: 16109955
Rv1467c	PMID: 9535763
Rv1472	PMID: 7451404;
Rv1475c	PMID: 17384188
Rv1483	PMID: 11932442; PMID: 12079383
Rv1484	PMID: 10336454
Rv1485	PMID: 15850757; PMID: 20628579; PMID:18275136;PMID:15850757
Rv1492	PMID: 18375549
Rv1493	PMID: 18375549
Rv1500	PMID: 18585090
Rv1508A	PMID: 9257704; http://www.springerlink.com/content/27613x2w1g274k8m
Rv1511	PMID: 18434250;PMID: 11565788; PMID: 10673432; BRENDA
Rv1512	PMID: 3338988; PMID: 11030750; PMID: 10480878; PMID: 9862812; PMID: 11565788; PMID: 18390543
Rv1525	PMID: 19047740
Rv1529	PMID: 15525680
Rv1533	BLAST; PMID: 16682407; BRENDA
Rv1536	PMID: 13792726
Rv1538c	PMID: 4987975; PMID: 4894591
Rv1540	BLAST; BRENDA; PMID: 19181797
Rv1551	PMID:18369234 http://www.ncbi.nlm.nih.gov/sites/entrez?cmd=Retrieve&db=Protein&list_uids=15608689&dopt=GenPept&RID=0YS7Z9C101S&log$=prottop&blast_rank=1
Rv1552	PMID: 18667562
Rv1553	PMID: 18667562
Rv1554	PMID: 18667562
Rv1555	PMID: 18667562
Rv1559	PMID: 14729707 ; PMID: 19542000
Rv1562c	PMID:906397;PMID: 10658666
Rv1563c	PMID: 10658666
Rv1568	PMID: 19345718 ; PMID: 16984394
Rv1569	PMID: 10642176 ; PMID: 16984394
Rv1570	PMID: 16984394
Rv1589	PMID: 11444982 ; PMID: 16984394
Rv1594	PMID: 18803397; PMID: 15937336; http://hasyweb.desy.de/science/annual_reports/2004_report/part2/contrib/75/12592.pdf
Rv1595	PMID: 18490451
Rv1596	PMID: 14532352; PMID: 9862811
Rv1599	http://en.cnki.com.cn/Article_en/CJFDTotal-FDXB200703021.htm; PMID: 11842181
Rv1600	PMID: 15007066; PMID: 19833135
Rv1601	PMID:13475302; PMID: 4611478
Rv1602	PMID: 8494895
Rv1603	PMID: 12634849
Rv1604	PMID: 20167072
Rv1605	PMID: 12657046;PMID: 11679715; PMID: 8494895
Rv1606	PMID: 18560150
Rv1607	PMID: 1700476; PMID: 15353332
Rv1609	PMID: 18952181
Rv1611	PMID: 19032598;PMID:16487066;PMID:17993538;BRENDA
Rv1612	PMID: 19430702;PMID: 16679524
Rv1613	PMID: 10361288
Rv1617	PMID: 15773987; PMID: 6614924
Rv1618	BRENDA; PMID: 17524985
Rv1620c	PMID: 15470119, PMID: 11717265
Rv1621c	PMID: 15470119, PMID: 11717265
Rv1622c	PMID: 15470119, PMID: 11717265
Rv1623c	PMID: 15470119, PMID: 11717265
Rv1625c	PMID: 14747729; PMID: 11431477; PMID: 12804785
Rv1631	PMID: 19876400
Rv1635c	PMID: 16704981; PMID: 17261566
Rv1640c	PMID: 19649276
Rv1647	PMID: 15500449
Rv1649	PMID: 14742205
Rv1650	PMID: 14742205
Rv1652	PMID: 17316682
Rv1653	PMID: 19194014
Rv1654	PMID: 15838030
Rv1655	PMID: 11075930
Rv1656	PMID: 17012791
Rv1658	PMID: 11305941; PMID: 35347 ; http://www.ncbi.nlm.nih.gov/sites/entrez?cmd=Retrieve&db=protein&dopt=GenPept&RID=VJT2E20R01S&log%24=prottop&blast_rank=1&list_uids=15608796
Rv1659	PMID: 11305941; http://www.ncbi.nlm.nih.gov/sites/entrez?cmd=Retrieve&db=protein&dopt=GenPept&RID=VJTDZ6J101N&log%24=prottop&blast_rank=1&list_uids=15608797; BRENDA
Rv1662	PMID: 16199577; PMID: 12824387; PMID: 12867474
Rv1663	PMID: 16199577, PMID: 12824387, PMID: 12867474
Rv1672c	PMID: 18398483; BLAST
Rv1679	PMID: 19625492; BRENDA
Rv1689	PMID: 10419962
Rv1692	http://pfam.sanger.ac.uk/family/PF00702.19
Rv1695	PMID: 11006082
Rv1699	PMID: 9415801; PMID: 18439916
Rv1700	PMID: 12906832
Rv1704c	PMID: 9634230
Rv1707	PMID: 17655757; PMID: 18255326
Rv1711	PMID: 19181797; PMID: 14566049
Rv1712	PMID: 19181797
Rv1714	PMID: 12777483
Rv1715	PMID: 20378648; PMID: 15525680
Rv1722	PMID: 19423629 ; PMID: 7909542
Rv1731	PMID: 16027371; PMID: 19911309; PMID: 3355840
Rv1736c	PMID: 18362135 ; PMID: 10483724
Rv1737c	PMID: 12933881
Rv1739c	PMID: 17555602
Rv1745c	PMID: 11158573
Rv1755c	PMID: 15805187 ; PMID: 15073306 ; PMID: 16533994
Rv1812c	PMID: 17655757
Rv1820	PMID: 12818195 ; PMID: 19542000 : PMID: 16111681
Rv1822	PMID: 10889206 : PMID: 8576035
Rv1826	PMID: 17384187 ; PMID: 17089148
Rv1832	PMID: 11888165 ; PMID: 6813266 ; PMID: 13948749
Rv1837c	PMID: 20306314 ; PMID: 16877713 : PMID: 12393860
Rv1843c	PMID: 14766016
Rv1844c	PMID: 8829540 : PMID: 10848959
Rv1848	PMID: 7568014 ; PMID: 7559354
Rv1849	PMID: 7568014 ; PMID: 7559354
Rv1850	PMID: 7568014 ; PMID: 7559354
Rv1854c	PMID: 17655757; PMID: 11408244
Rv1857	PMID: 10564470 ; PMID: 17098899 ; PMID: 10978546 ; PMID: 9325422
Rv1858	PMID: 10564470; PMID: 17098899; PMID: 10978546; PMID: 9325422
Rv1859	PMID: 9325422 ; PMID: 10978546
Rv1867	BLAST; BRENDA; PMID: 15733928
Rv1872c	PMID: 16204505; PMID: 20520732
Rv1878	PMID: 12952538; PMID: 16262797; PMID: 19245690; PMID: 17057098; PMID: 18469098
Rv1885c	PMID: 17965159; PMID: 15737998; PMID: 16752890; PMID: 15654876; PMID: 16499927; PMID: 17418569
Rv1894c	PMID: 17635188; PMID: 18491971
Rv1895	BLAST; PFAM; PMID: 18752625
Rv1900c	PMID: 15678099
Rv1902c	PMID: 12897000
Rv1905c	PMID: 18084756
Rv1908c	PMID: 9006925
Rv1912c	PMID:11565788
Rv1915	PMID: 16879647
Rv1916	PMID: 16879647
Rv1928c	PMID: 19047741; Blast
Rv1933c	PMID: 19389781
Rv1934c	PMID: 19389781
Rv1935c	PMID: 19389781
Rv1940	PMID: 19805901; BRENDA;PMID: 18500821
Rv1981c	PMID: 17918768; PMID: 7961427
Rv2006	PMID: 15158675; PMID: 17266712;PMID: 10658666
Rv2029c	PMID: 172204; PMID: 184906; PMID: 149128
Rv2043c	PMID: 11171040
Rv2051c	PMID: 11931640
Rv2062c	PMID: 12869542 ; PMID: 9742225
Rv2064	PMID: 12869542; PMID: 8405386; PMID: 9742225
Rv2065	PMID: 15609338
Rv2066	PMID: 8405386 ; PMID: 8226690
Rv2070c	PMID: 16427313 ; PMID: 17322185; PMID: 19833135
Rv2071c	PMID: 16427313 ; PMID: 17322185
Rv2072c	PMID: 16427313 ; PMID: 17322185
Rv2074	PMID: 16880544
Rv2121c	PMID: 18560150;PMID: 12511575; PMID: 10707257
Rv2122c	PMID: 18560150; PMID: 12511575; PMID: 10707257
Rv2124c	PMID: 14752199
Rv2127	PMID: 16322769
Rv2130c	PMID: 12958317; PMID: 17848100; PMID: 12033919
Rv2131c	PMID: 18454554 ; PMID: 17970225
Rv2135c	PMID: 16672613 ; PMID: 16511148 ; PFAM ; BLAST
Rv2136c	PMID: 19465648; PMID: 15138271
Rv2139	PMID: 17601781; PMID: 19530672
Rv2148c	PMID: 9914259 ; PMID: 11933250 ; PMID: 16997906 ; PMID: 15683232 ; PMID: 11267762 ; http://pfam.sanger.ac.uk/family/PF01168.13
Rv2152c	PMID: 18259126; PMID: 19484275; PMID: 11073931; PMID: 11555614; PMID: 14594822; PMID: 18974047
Rv2153c	PMID: 12851929; PMID: 11555614
Rv2155c	PMID: 18557704; PMID: 18259126; PMID: 11555614
Rv2156c	PMID: 1846850 ; PMID: 11073931; PMID: 11555614
Rv2157c	PMID: 10498701 ; PMID: 16322581 ; PMID: 16492149
Rv2158c	PMID: 19945347; PMID: 11398928
Rv2163c	PMID: 17427288; PMID: 19763328; PMID: 19496931
Rv2174	PMID: 17714444
Rv2178c	PMID: 15721768 ; PMID: 15987779
Rv2181	PMID: 16945913; PMID: 19004785
Rv2182c	PMID: 20097706 ; PMID: 18252723
Rv2188c	PMID: 19638342 ; PMID: 11964144
Rv2192c	PMID: 16337227 ; PMID: 15933004
Rv2193	PMID: 11717265
Rv2194	PMID: 11717265
Rv2195	PMID: 11717265
Rv2196	PMID: 11717265
Rv2200c	PMID: 11717265
Rv2201	PMID: 16377694
Rv2202c	PMID: 14594827
Rv2205c	http://pfam.sanger.ac.uk//family/PF02595; http://www.ncbi.nlm.nih.gov/sites/entrez?cmd=Retrieve&db=protein&dopt=GenPept&RID=VKD01P1G01N&log%24=prottop&blast_rank=9&list_uids=183983240; PMID: 5325263
Rv2207	PMID: 9211916; PMID: 10518530
Rv2208	PMID: 10518530
Rv2210c	PMID: 19923721; PMID: 15471546
Rv2211c	PMID: 12531904
Rv2212	PMID: 16925585
Rv2215	PMID: 16368957; PMID: 16045627
Rv2218	PMID: 16735476
Rv2220	PMID: 11489128; PMID: 16027359; PMID: 18440867
Rv2222c	PMID: 18440867;PMID: 16262797; PMID: 18691144; PMID: 17057098
Rv2225	PMID: 12515554; PMID: 11669627
Rv2231c	PMID: 17322185
Rv2233	BLAST
Rv2236c	PMID: 15133100; BRENDA
Rv2241	PMID: 16045627; PMID: 16109942; BRENDA
Rv2243	PMID: 18156607; PMID: 16112872
Rv2244	PMID: 11825906; PMID: 17555433
Rv2245	pmid:19604480
Rv2246	PMID: 11600501; PMID: 12464486; PMID: 17174327
Rv2247	PMID: 17114269;PMID: 17157300
Rv2249c	PMID: 16816185
Rv2252	PMID: 16689792
Rv2259	PMID: 12809551
Rv2267c	BLAST ; PMID: 12144918 ; PMID: 11882713
Rv2277c	BLAST; PFAM; PMID: 10760272
Rv2281	BLAST ; PMID: 11489853 ; http://dspace1.rockefeller.edu/bitstream/10209/118/1/MeghanKirksey.pdf
Rv2287	PMID: 17993538
Rv2289	PMID: 4335869; PMID: 16573683
Rv2298	BLAST ; CDD ; PFAM ; PMID: 20188740;PMID: 14532352
Rv2316	PMID:17557815; PMID:10978546
Rv2317	PMID:17557815; PMID:10978546
Rv2318	PMID: 10978546; PMID : 17557815
Rv2320c	PMID 10648515; PMID: 8382989; PMID:10781607; PMID: 16788192
Rv2321c	PMID: 18032107; PMID: 17906132
Rv2322c	PMID: 18032107; PMID: 17906132
Rv2329c	PMID: 2668029; PMID: 18823285; PMID: 9529885; PMID: 11289303; PMID: 11967076; PMID: 16391109
Rv2331	PMID: 2669674; BLAST
Rv2331A	BLAST
Rv2332	PMID: 10483724 ; http://www.bioinformation.net/004.html ; Tuberculist ; Brenda
Rv2334	PMID: 17567578
Rv2335	PMID: 19101553;
Rv2344c	PMID: 9422594 ; PMID: 2826481
Rv2357c	PMID: 10224248 ; PMID: 8839980
Rv2361c	PMID: 10816587; PMID: 11555614
Rv2363	PMID: 15595822;http://pfam.sanger.ac.uk/family/PF01425.14
Rv2378c	PMID: 12065475; PMID: 10419938; PMID: 9831524
Rv2379c	PMID: 12065475; PMID: 10419938; PMID: 9831524
Rv2380c	PMID: 12065475; PMID: 10419938; PMID: 9831524; PMID: 12622807
Rv2381c	PMID: 12065475; PMID: 10419938; PMID: 9831524; PMID: 12622807
Rv2382c	PMID: 12065475; PMID: 10419938; PMID: 9831524; PMID: 12622807
Rv2383c	PMID: 12065475; PMID: 10419938; PMID: 9831524; PMID: 12622807
Rv2384	PMID: 12065475; PMID: 10419938; PMID: 9831524; PMID: 12622807; PMID: 19050743
Rv2386c	PMID: 16508110
Rv2388c	PMID: 14688133; PMID: 12114526
Rv2391	PMID: 15917234;PMID: 17644602
Rv2392	PMID: 16553880; PMID: 10075658
Rv2393	PMID: 17644602
Rv2394	PMID: 15539077; PMID: 16452418; BRENDA; http://www.northumbria.ac.uk/static/5007/appdf/mycobtub.pdf
Rv2397c	PMID: 17555602
Rv2398c	PMID: 17555602
Rv2399c	PMID: 17555602
Rv2400c	PMID: 17555602
Rv2419c	PMID: 15735341
Rv2421c	http://journal.shouxi.net/qikan/article.php?id=182430; PMID: 11704676
Rv2427c	PMID: 17316682
Rv2435c	http://tobias-lib.uni-tuebingen.de/volltexte/2006/2173/pdf/Dissertation_Motaal.pdf; PMID: 15805514 ; BRENDA
Rv2436	PMID: 9519409
Rv2438c	pmid:19270703
Rv2439c	PMID: 2567735
Rv2443	PMID: 19581365
Rv2445c	PMID: 12581202
Rv2447c	PMID: 16754987
Rv2448c	PMID: 19398261; PMID: 9618503
Rv2453c	PMID: 19936047; http://hasyweb.desy.de/science/annual_reports/2006_report/part2/contrib/72/17696.pdf
Rv2454c	PMID: 15608701; PMID: 18466296
Rv2455c	PMID: 15608701; PMID: 18466296
Rv2458	PMID: 10026151
Rv2465c	pubmed:14687575
Rv2467	PMID: 9493394
Rv2471	PMID: 17015651
Rv2476c	PMID: 19766738 ; PMID: 19019160 ; BRENDA
Rv2482c	PMID: 7929384
Rv2483c	PMID: 12851411; BRENDA
Rv2486	PMID: 12467702; PMID: 5057465
Rv2495c	PMID: 16045627
Rv2496c	PMID: 16045627
Rv2497c	PMID: 16045627
Rv2498c	PMID: 17064730
Rv2500c	BRENDA; PMID: 3968064
Rv2501c	PMID: 16385038; PMID: 17114269; PMID: 17157300
Rv2502c	PMID: 16492739; PMID: 16385038; PMID: 17114269; PMID: 17157300
Rv2503c	PMID: 15528667; PMID: 17064730;PMID: 17363272
Rv2504c	PMID: 15528667; PMID: 17064730;PMID: 17363272
Rv2523c	PMID: 16709676; PMID: 10419938
Rv2524c	PMID: 11914348; PMID: 10973326;PMID: 15205406; PMID: 10869086; PMID: 17485499
Rv2531c	PMID: 10648515; PMID: 2667997; PMID: 12540586
Rv2537c	PMID: 10360352; PMID: 12387860; PMID: 1329726; PMID: 1910148; PMID: 8064862
Rv2538c	PMID: 17586643; PMID: 1910148;PMID: 9765999
Rv2539c	PMID: 12368440; PMID: 11483005 ; PMID: 11717501; PMID: 15583379; PMID: 16834327
Rv2540c	PMID: 15502309; PMID: 18445278
Rv2552c	PMID: 16202245 ; PMID: 12356471; PMID: 17348835; PMID: 12368440
Rv2555c	PMID: 10601222
Rv2564	PMID: 15952732; PMID: 16077135;PMID: 15557595; PMID: 15539077
Rv2572c	PMID: 10508395 ; PMID: 12486031
Rv2573	PMID: 14503879 ; http://pfam.sanger.ac.uk/family/PF02558.9
Rv2580c	PMID: 10430027
Rv2583c	PMID: 16026164; PMID: 11444965; PMID: 17655757
Rv2584c	PMID: 19362594
Rv2589	PMID: 19854901; PMID: 10992494
Rv2590	PMID: 19228590;PMID: 11489128;PMID: 18946503;PMID: 15525680
Rv2601	http://www.ncbi.nlm.nih.gov/pmc/articles/PMC176332/pdf/aac00173-0179.pdf
Rv2604c	BLAST; PMID: 9791124; PMID: 8955308
Rv2605c	PMID: 15933028; PMID:18247525; PMID: 1645722
Rv2606c	PMID:8955308; PMID:10430950
Rv2607	PMID: 16374842
Rv2610c	PMID: 12068013; PMID: 16511084
Rv2611c	PMID: 12758196
Rv2612c	PMID: 12005437; PMID: 12122024; PMID: 9989274
Rv2614c	PMID: 11953757
Rv2671	PMID: 30756; PMID: 17115689; http://www.beilstein-institut.de/Bozen2008/Proceedings/Roberts/Roberts.pdf
Rv2674	PMID: 19040639
Rv2677c	PMID: 7928957; PMID: 9784236
Rv2678c	PMID: 17122346; PMID: 11948155; PMID: 7928957
Rv2679	PMID: 17073090; PMID: 17240207
Rv2682c	PMID: 12499403; PMID: 11555614
Rv2691	PMID: 16286358; PMID: 17115689; PMID: 9784509; http://www.sajei.co.za/index.php/SAJEI/article/viewFile/103/122
Rv2692	PMID: 16286358
Rv2697c	PMID: 15276840;PMID: 18837522
Rv2701c	PMID: 11914086
Rv2702	PMID: 8703950
Rv2724c	PMID: 15972512
Rv2726c	PMID:19307721 ; PMID: 17889830 ; PMID: 16907737;PMID: 9559056
Rv2746c	PMID: 10889206;PMID: 793612; PMID: 1092363
Rv2747	PMID: 15838030
Rv2753c	PMID: 18054225;PMID: 18062777;PMID: 17077492; PMID: 20122228
Rv2754c	PMID: 16139296
Rv2763c	PMID: 15019741;PMID: 16648861; PMID: 17451962; PMID: 18156607; PMID: 19237648; PMID: 20566771
Rv2764c	PMID: 18493582
Rv2773c	PMID: 16511139; PMID: 20057050
Rv2780	PMID: 18491387, PMID: 18453703;PMID: 18304579;PMID: 10527947
Rv2786c	PMID: 14927668
Rv2789c	PMID: 9535763
Rv2793c	PMID: 15028724
Rv2831	PMID: 12445775
Rv2832c	PMID: 10978546; PMID: 8407831
Rv2833c	PMID: 10978546; PMID: 8407831
Rv2834c	PMID: 10978546; PMID: 8407831
Rv2835c	PMID: 10978546 ; PMID: 17557815
Rv2845c	PMID: 11408489; PMID: 12130657
Rv2847c	PMID: 2407234; PMID: 7945210
Rv2848c	PMID: 10966576
Rv2849c	PMID: 18607099
Rv2852c	PMID: 17501996; PMID: 11092846; PMID: 19564154
Rv2855	PMID: 15185746;PMID: 10512639; PMID: 17286835
Rv2856	PMID: 17726022; PMID: 15353332
Rv2858c	PMID: 18668238
Rv2859c	PMID: 20066036
Rv2860c	PMID: 18691144; PMID: 12146952; PMID: 16262797; PMID: 19245690
Rv2868c	PMID: 12571359; PMID: 18793870
Rv2870c	PMID: 16790937; PMID: 15065882; PMID: 17874041; PMID: 18489786; PMID: 17491006
Rv2881c	PMID: 12106014
Rv2883c	PMID: 17210578; http://www.edipucrs.com.br/Vmostra/V_MOSTRA_PDF/Biologia_Celular_e_Molecular/82710-DIANA_CAROLINA_ROSTIROLLA.pdf; http://knol.google.com/k/symb/challenge-n-1-is-the-synteny-around-the/c390t9c12uxx/11#
Rv2899c	PMID: 15608701; BRENDA
Rv2900c	PMID: 12460112
Rv2911	http://www.pdb.org/pdb/explore.do?structureId=2BCF; BRENDA
Rv2920c	PMID: 18824837
Rv2922A	PMID: 9118002
Rv2928	PMID: 15668773;PMID: 17030019
Rv2930	PMID: 19228590; PMID:15784584
Rv2931	PMID: 12138124; PMID: 15784584
Rv2932	PMID: 12138124; PMID: 15784584
Rv2933	PMID: 12138124; PMID: 15784584
Rv2934	PMID: 12138124; PMID:15784584
Rv2935	PMID: 12138124; PMID: 15784584
Rv2940c	PMID:17389997; PMID: 1527058; PMID: 3880746
Rv2941	PMID: 12446629
Rv2945c	PMID: 16541102
Rv2947c	PMID: 12138124
Rv2949c	PMID: 16210318; PMID: 19648248
Rv2957	PMID: 15292272
Rv2958c	PMID: 15292272
Rv2962c	PMID: 15292272
Rv2964	PMID: 7868604
Rv2965c	PMID: 14684928; PMID:15322293
Rv2967c	PMID: 10913817; PMID: 1445229
Rv2977c	PMID: 11470904; PMID:18311927
Rv2981c	PMID: 11073937; PMID: 12499203; BRENDA
Rv2982c	PMID: 10801498; PMID: 14557599; PMID: 10858253; PMID: 14051819
Rv2984	PMID: 17630969; PMID: 4337332; PMID:18335046
Rv2987c	PMID: 10768986; PMID: 19194004; PMID: 12857778; BRENDA
Rv2988c	PMID: 10768986; PMID: 15159544; PMID: 19194004
Rv2995c	PMID: 15663922
Rv2996c	PMID: 15668250;PMID: 17761677
Rv3001c	PMID: 8366043
Rv3002c	PMID: 8366043
Rv3003c	PMID: 8366043
Rv3009c	PMID: 17929881
Rv3010c	PMID: 12622807; PMID: 6218374; PMID: 15773987
Rv3011c	PMID: 11880622; PMID: 11585842; PMID: 17929881
Rv3012c	PMID: 17929881
Rv3025c	PMID:17609386;PMID: 16109955;PMID: 12382038
Rv3039c	PMID: 7451405, PMID: 773366
Rv3042c	PMID: 19447677, BRENDA; PMID: 12657046
Rv3043c	PMID: 16159762; PMID: 12446663; PMID: 16227431; PMID: 11577165
Rv3045	PMID: 11500455; BRENDA
Rv3048c	PMID: 15225619
Rv3051c	PMID: 14573627
Rv3052c	PMID: 18502861 ; PMID: 9335290 ; PMID:15386096 ; PMID: 18799738
Rv3053c	PMID: 15386096 ; PMID: 11441020 ; PMID: 20096772
Rv3061c	PMID: 19182784
Rv3068c	PMID: 15238632; PMID: 16595672 ; PMID: 16238626; http://gradworks.umi.com/32/48/3248036.html
Rv3075c	http://pfam.sanger.ac.uk/family/PF03328.7
Rv3106	PMID: 12614197
Rv3109	PMID: 15317939
Rv3111	PMID: 15317939 ; PMID: 16159772
Rv3112	PMID: 11713534 ; PMID: 16159772 ;PMID: 19946146
Rv3113	BLAST ; PFAM ; PMID: 16166535
Rv3119	PMID: 11135669
Rv3137	PMID: 20167072 ;PMID: 17725819;
Rv3139	PMID: 9535763;PMID:18156607;PMID:16127044;PMID:11489128;PMID20377898
Rv3140	PMID: 9535763;PMID:18657035;PMID:12777483;PMID:18156607;PMID:16127044;BRENDA
Rv3141	PMID: 18068389; PMID: 10537214
Rv3145	PMID: 786986;PMID:17501996;PMID:20553485;PMID:17906132;PMID:14741580;BRENDA;BLAST
Rv3146	PMID: 786986;PMID:17501996;PMID:20553485;PMID:17906132;PMID:14741580;BRENDA;BLAST
Rv3147	PMID: 786986;PMID:17501996;PMID:20553485;PMID:17906132;PMID:14741580;BRENDA;BLAST
Rv3148	PMID: 786986;PMID:17501996;PMID:20553485;PMID:17906132;PMID:14741580;BRENDA;BLAST
Rv3149	PMID: 786986;PMID:17501996;PMID:20553485;PMID:17906132;PMID:14741580;BRENDA;BLAST
Rv3150	PMID: 786986;PMID:17501996;PMID:20553485;PMID:17906132;PMID:14741580;BRENDA;BLAST
Rv3151	PMID: 786986;PMID:17501996;PMID:20553485;PMID:17906132;PMID:14741580;BRENDA;BLAST
Rv3152	PMID: 786986;PMID:17501996;PMID:20553485;PMID:17906132;PMID:14741580;BRENDA;BLAST
Rv3153	PMID: 786986;PMID:17501996;PMID:20553485;PMID:17906132;PMID:14741580;BRENDA;BLAST
Rv3154	PMID: 786986;PMID:17501996;PMID:20553485;PMID:17906132;PMID:14741580;BRENDA;BLAST
Rv3155	PMID: 786986;PMID:17501996;PMID:20553485;PMID:17906132;PMID:14741580;BRENDA;BLAST
Rv3156	PMID: 786986;PMID:17501996;PMID:20553485;PMID:17906132;PMID:14741580;BRENDA;BLAST
Rv3157	PMID: 786986;PMID:17501996;PMID:20553485;PMID:17906132;PMID:14741580;BRENDA;BLAST
Rv3158	PMID: 786986;PMID:17501996;PMID:20553485;PMID:17906132;PMID:14741580;BRENDA;BLAST
Rv3214	PMID: 2543188; PMID: 6115412, PMID: 16672613
Rv3215	PMID: 10419938
Rv3227	PMID: 17348835; PMID: 12699693
Rv3229c	PMID: 17087501; PMID: 18723625
Rv3236c	PMID: 16322769; PMID: 15353332 ; PMID: 14569030
Rv3247c	PMID: 15628853
Rv3248c	PMID: 18815415;PMID: 13641268
Rv3255c	PMID:12593673;PMID:16238626
Rv3256c	PMID: 12775759; BLAST; PMID: 8106458
Rv3257c	PMID:12593673;PMID:16238626
Rv3261	PMID: 11717263
Rv3262	PMID: 11717263
Rv3264c	PMID:11302803;PMID:16238626;PMID:12101286
Rv3265c	PMID: 17261566; PMID: 11555614; PMID: 15294902; PMID: 12029057
Rv3266c	PMID:11302803;PMID:11555614
Rv3273	PMID:19438226;PMID:19651511;PMID:15753099;PMID:19338333;PMID:15952732;PMID:18167490
Rv3274c	PMID:13319294;PMID:20377898;BLAST;PHYRE;BRENDA
Rv3275c	PMID:11565788; PMID:2644189
Rv3276c	PMID:2644189
Rv3279c	PMID:18540066;BRENDA
Rv3280	PMID:16354663;PMID:17157300;PMID:16492739;PMID:16385038;PMID:14532352;PMID:11929527;PMID:447686
Rv3281	PMID: 16385038; PMID: 16492739
Rv3283	PMID: 11500455; PMID: 15928073
Rv3285	PMID: 16354663
Rv3290c	PMID: 16754985
Rv3293	PMID: 10965037;PMID: 9721323
Rv3300c	PMID: 17384187
Rv3302c	PMID: 17372194
Rv3303c	PMID: 12590611; PMID: 12463758 ; PMID: 11560483
Rv3307	PMID: 11444966
Rv3308	PMID: 16391123
Rv3309c	PMID: 9161706;http://www.pucrs.br/edipucrs/IVmostra/IV_MOSTRA_PDF/Biologia_Celular_e_Molecular/71921-ANNE_DRUMOND_VILLELA.pdf
Rv3310	PMID: 11073936
Rv3313c	PMID: 11444965; BRENDA; PMID: 16415880
Rv3314c	PMID:4862197
Rv3315c	PMID: 20035876 ;PMID:15421968
Rv3316	BLAST;Interpro scan;BRENDA
Rv3317	BLAST;Interpro scan;BRENDA
Rv3318	BLAST;Interpro scan;BRENDA
Rv3319	BLAST;Interpro scan;BRENDA
Rv3323c	PMID: 11972321
Rv3324c	PMID: 17064286
Rv3330	PMID: 17286964
Rv3331	PMID: 16940050; PMID: 17557815
Rv3332	PMID: 19332828;PMID: 14557599
Rv3336c	BLAST,BRENDA,PMID: 8555191
Rv3339c	PMID: 16194279
Rv3340	PMID: 15576367
Rv3341	PMID: 15576367
Rv3356c	PMID: 13462986; PMID: 13499428
Rv3372	PMID:15703182; PMID:10658666;PMID: 15158675;PMID: 12417583
Rv3373	PMID: 12467702, PMID: 12445775; PMID 8895557; PMID 2303409
Rv3374	PMID: 12467702; PMID: 12445775; PMID 8895557; PMID 2303409; PMID: 13499425; PMID: 5808333
Rv3377c	PMID: 4295782
Rv3379c	PMID:17655757; PMID 10648511; PMID: 20172995; PMID: 11555614
Rv3382c	PMID: 12706830; PMID 11818558; PMID: 20172995
Rv3393	PMID: 8702965 ; PMID: 11854281; PMID: 15909995
Rv3396c	PMID: 17868038
Rv3398c	PMID: 15060088 ; PMID: 11004176
Rv3400	PMID: 10658666
Rv3401	PMID: 10658666; PMID: 15703182
Rv3406	PMID: 9287300
Rv3410c	PMID: 14766016;PMID: 15451099
Rv3411c	PMID: 10390598 ; PMID: 17480004
Rv3423c	PMID: 12499203 ; PMID: 15683232
Rv3432c	PMID: 6137201; PMID: 11238978
Rv3436c	PMID: 18573680
Rv3441c	PMID: 18573680
Rv3455c	PMID: 15028724
Rv3464	PMID: 11302803; PMID: 16472764
Rv3465	Ref NA
Rv3468c	PMID: 11302803
Rv3469c	PMID: 12176930
Rv3470c	PMID: 19542000;PMID: 16111681
Rv3490	PMID: 12473104; PMID: 10658666
Rv3504	PMID: 9535763; PMID: 17264217; http://www.brenda-enzymes.org/php/result_flat.php4?ecno=1.3.99.3
Rv3505	PMID: 9535763; http://www.brenda-enzymes.org/php/result_flat.php4?ecno=1.3.99.3
Rv3509c	PMID: 16111681
Rv3516	PMID: 10841782 ; PMID: 10727085
Rv3529c	PMID: 17635188
Rv3534c	PMID: 18275136; PMID: 12176930; BRENDA
Rv3535c	PMID: 18275136; PMID: 12176930; BRENDA
Rv3536c	PMID: 18275136; PMID: 12176930; BRENDA
Rv3543c	PMID: 17264217; http://www.brenda-enzymes.org/php/result_flat.php4?ecno=1.3.99.3
Rv3544c	PMID: 17264217; http://www.brenda-enzymes.org/php/result_flat.php4?ecno=1.3.99.3
Rv3546	PMID: 19822655 ; PMID: 17635188; BRENDA
Rv3550	PMID: 10841782 ; PMID: 10727085
Rv3556c	PMID: 12953091
Rv3560c	PMID: 19018016; BRENDA
Rv3562	PMID: 20167624; BRENDA
Rv3563	PMID: 18454323; PMID: 9535763; PMID: 18486437; BRENDA
Rv3564	PMID: 18454323; BRENDA
Rv3565	PMID: 12081975
Rv3573c	PMID: 17635188
Rv3580c	PMID: 15489861; PMID: 12033919
Rv3581c	PMID:17956607 ; PMID: 20189102 ; PMID:11786530
Rv3582c	PMID: 18047786; PMID: 17921290
Rv3588c	PMID: 16321983
Rv3598c	PMID: 19649276; PMID: 1732205; PMID: 3853966
Rv3600c	PMID:12754240; PMID:16508093 http://www.ncbi.nlm.nih.gov/sites/entrez?cmd=Retrieve&db=Protein&list_uids=15610736&dopt=GenPept&RID=10RV2P51012&log$=prottop&blast_rank=1
Rv3601c	PMID: 12182836; 15170354
Rv3602c	PMID: 16460002; PMID: 12717031; PMID: 19099550; PMID: 11669627; PMID: 15170354
Rv3606c	PMID: 17134675; PMID: 15826662
Rv3607c	PMID: 15876368
Rv3608c	PMID: 18680522; PMID: 19237648
Rv3609c	PMID: 7887891; PMID: 1551827; PMID: 17032654
Rv3624c	PMID: 19362594
Rv3627c	BLAST; BRENDA; PMID: 15109786
Rv3628	PMID: 4602033 ; http://pfam.sanger.ac.uk/family/PF00719.12
Rv3634c	PMID: 9692181; PMID: 16472764; PMID: 11302803
Rv3645	PMID: 15182360; PMID: 10418137
Rv3667	PMID: 19767422; BRENDA
Rv3684	PMID: 17567578; PMID: 14557599
Rv3696c	PMID: 17555602; PMID: 17557815
Rv3704c	PMID: 16262797
Rv3708c	PMID: 18323599 ; PMID: 15752328
Rv3709c	PMID: 15645479 ; PMID: 10509015
Rv3710	PMID: 15159544
Rv3713	PMID: 10966576
Rv3737	PMID: 11514515
Rv3754	PMID: 16889979
Rv3756c	PMID: 10658666; PMID: 10978546
Rv3757c	PMID: 10658666; PMID: 10978546
Rv3758c	PMID: 10658666; PMID: 10978546
Rv3759c	PMID: 10658666; PMID: 10978546
Rv3761c	PMID: 9535763; BRENDA
Rv3772	PMID: 11294630; BRENDA; PMID: 19018016
Rv3774	PMID: 17240207; PMID: 20511508 ; BRENDA
Rv3777	PMID: 14617159; PMID: 17115689
Rv3784	PMID: 11302803
Rv3790	PMID: 16291675
Rv3791	PMID: 16291675
Rv3792	PMID: 16595677
Rv3793	PMID: 18424526;PMID: 19596878
Rv3794	PMID: 11677227; PMID: 17956343; PMID: 18174142
Rv3795	PMID: 11677227; PMID: 17956343; PMID: 18174142
Rv3797	PMID: 12657046
Rv3800c	PMID: 19436070; PMID: 15653820;PMID: 14695899
Rv3801c	PMID: 19169353
Rv3806c	PMID: 15878857
Rv3807c	PMID: 18667564
Rv3808c	PMID: 11304545;PMID: 11395463
Rv3809c	PMID: 12499218
Rv3815c	PMID: 12851411;BRENDA
Rv3818	PMID: 15522883
Rv3826	PMID: 17768256; http://www.phri.org/news/Fontan,Microbe09(4)119.pdf
Rv3834c	PMID: 19721072; PMID: 12392560
Rv3838c	PMID: 15753077 ; PMID: 18384085
Rv3842c	PMID: 18083802 ; PMID: 2829735
Rv3846	PMID: 8289318
Rv3858c	PMID: 16143852; PMID: 18493948; PMID: 11700347
Rv3859c	PMID: 16143852; PMID: 18493948; PMID: 11700347
Rv3913	PMID: 16301794
Rv3914	PMID: 18723612; PMID: 19121228; PMID: 17139080

## Sheet: Table.S2
Metabolites	Gene Connectivity
accoa[c]	100
fad[c]	81
fadh2[c]	80
odecoa[c]	79
occoa[c]	79
ppcoa[c]	76
hdcoa[c]	70
tdcoa[c]	70
octscoa[c]	67
hexscoa[c]	67
tetscoa[c]	67
doscoa[c]	67
eiscoa[c]	67
octdcoa[c]	67
hexdcoa[c]	67
dodcoa[c]	67
decoa[c]	67
hexcoa[c]	67
butcoa[c]	67
c5tetdcoa[c]	67
c3dodcoa[c]	67
t2dodcoa[c]	67
d2hdodcoa[c]	67
nodcoa[c]	67
hepdcoa[c]	67
pentdcoa[c]	67
tridcoa[c]	67
undcoa[c]	67
nocoa[c]	67
hepcoa[c]	67
pentcoa[c]	67
glu-L[c]	53
o2[c]	41
pyr[c]	38
h[e]	35
mql8[c]	34
mqn8[c]	33
gln-L[c]	30
succ[c]	27
q8h2[c]	27
q8[c]	27
gtp[c]	26
gdp[c]	25
2dmmq8[c]	24
akg[c]	23
ocdca[c]	22
2dmmql8[c]	22
malcoa[c]	20
qh2[c]	19
q[c]	19
ser-L[c]	19
hdca[c]	17
hco3[c]	17
amet[c]	17
ac[c]	16
mmcoa-S[c]	16
fum[c]	15
glyc3p[c]	15
no2[c]	15
ACP[c]	14
prpp[c]	14
ahcys[c]	14
thf[c]	14
cys-L[c]	14
camp[c]	13
for[c]	13
ala-L[c]	13
ttdca[c]	13
acald[c]	12
asp-L[c]	12
g3p[c]	12
ocdcea[c]	12
tre[c]	12
lys-L[c]	11
hdcea[c]	11
octa[c]	11
g6p[c]	11
g3pe[c]	11
met-L[c]	11
thr-L[c]	11
chor[c]	10
h2o2[c]	10
dhap[c]	10
f6p[c]	10
uaaAgla[c]	10
uaaGgla[c]	10
uaagmda[c]	10
trdrd[c]	10
trdox[c]	10
r5p[c]	10
hexc[c]	9
decd-tb[c]	9
gly[c]	9
cmp[c]	9
utp[c]	9
ctp[c]	9
cdp[c]	9
gdpmann[c]	9
udp[c]	9
mlthf[c]	9
gthrd[c]	9
mmeroacidACP[c]	9
kmeroacidACP[c]	9
2agpe180[c]	8
dgdp[c]	8
hcys-L[c]	8
succoa[c]	8
ficytc[c]	8
focytc[c]	8
ipdp[c]	8
salc[c]	8
so4[c]	8
cpmp[c]	8
ump[c]	7
gmp[c]	7
paps[c]	7
pa160[c]	7
asn-L[c]	7
bhb[c]	7
h2s[c]	7
cmcbtt[c]	7
tsul[c]	7
dcdp[c]	7
pep[c]	7
pmtcoa[c]	7
ura[c]	7
arach[c]	7
malACP[c]	7
mcbtt[c]	7
g1p[c]	7
udpgal[c]	7
udpg[c]	7
glc-D[c]	7
3pg[c]	7
mi1p-D[c]	7
mcbts[c]	7
pro-L[c]	7
udcpdp[c]	7
sucsal[c]	6
alac-S[c]	6
cit[c]	6
icit[c]	6
pap[c]	6
imp[c]	6
decda-tb[c]	6
10fthf[c]	6
ala-D[c]	6
cdpdhdecg[c]	6
cdpc16c19g[c]	6
so3[c]	6
ru5p-D[c]	6
dtdp[c]	6
k[e]	6
so4[e]	6
glx[c]	6
k[c]	6
lac-L[c]	6
man6p[c]	6
no3[c]	6
pydx5p[c]	6
prephthACP[c]	6
prepphthACP[c]	6
uacgam[c]	5
orn[c]	5
fmn[c]	5
adcobhex[c]	5
pppi[c]	5
pa160190[c]	5
air[c]	5
dhlam[c]	5
mqn6[c]	5
arachACP[c]	5
arg-L[c]	5
glyb[c]	5
inost[c]	5
adfdOX[c]	5
adfdRD[c]	5
cyst-L[c]	5
stcoa[c]	5
mql6[c]	5
tsul[e]	5
phdcaACP[c]	5
fdp[c]	5
fe2[c]	5
fdxrd[c]	5
fdxox[c]	5
mal-L[c]	5
decdman1p-tb[c]	5
PIM4[c]	5
dtdpglu[c]	5
6pgl[c]	5
rib-D[c]	5
malt[c]	5
meroacidACP[c]	5
nicrnt[c]	5
dtdprmn[c]	5
adhlam[c]	5
peptido-EC[c]	5
peptido-TB1[c]	5
peptido-TB2[c]	5
dtdp4d6dg[c]	5
psd5p[c]	5
2mcit[c]	5
2mcacn[c]	5
MoaD[c]	5
LM[c]	5
mstrACP[c]	4
aacoa[c]	4
actp[c]	4
ribflv[c]	4
adn[c]	4
adcobdam[c]	4
urea[c]	4
pa190190[c]	4
5aizc[c]	4
fald[c]	4
cbp[c]	4
cdpc19c19g[c]	4
chol[e]	4
chol[c]	4
pphn[c]	4
crn[e]	4
crn[c]	4
acser[c]	4
3mob[c]	4
dhf[c]	4
dxyl5p[c]	4
2pg[c]	4
atp[e]	4
glyb[e]	4
glyc3p[e]	4
gthrd[e]	4
h2o[e]	4
no2[e]	4
pi[e]	4
pro-L[e]	4
xyl-D[e]	4
ttc[c]	4
fgam[c]	4
gdpddman[c]	4
uaaAgtla[c]	4
uaaGgtla[c]	4
uaagtmda[c]	4
xmp[c]	4
imacp[c]	4
malthp[c]	4
man1p[c]	4
mmcoa-R[c]	4
mmmeroacidACP[c]	4
mkmeroacidACP[c]	4
nac[c]	4
lpam[c]	4
pser-L[c]	4
pyam5p[c]	4
tres[c]	4
uppg3[c]	4
xyl-D[c]	4
gln-L[e]	4
gln[c]	4
mob[c]	4
f420-2[c]	4
mobpt[c]	4
mocdca[c]	3
palmACP[c]	3
4abut[c]	3
acgam1p[c]	3
udcpp[c]	3
unaga[c]	3
acglu[c]	3
2obut[c]	3
ins[c]	3
4adcho[c]	3
4abz[c]	3
adocbi[c]	3
dgtp[c]	3
adocbl[c]	3
ade[c]	3
aicar[c]	3
agalfragund[c]	3
1hdecg3p[c]	3
1msg3p[c]	3
alaala[c]	3
8aonn[c]	3
cgly[c]	3
anth[c]	3
ala-B[c]	3
citr-L[c]	3
aspsa[c]	3
btn[c]	3
dtbt[c]	3
s[c]	3
igam[c]	3
co[c]	3
fdox[c]	3
fdred[c]	3
dadp[c]	3
12dgr160[c]	3
26dap-M[c]	3
decdr-tb[c]	3
dctp[c]	3
dutp[c]	3
e4p[c]	3
dhpt[c]	3
25dhpp[c]	3
dtmp[c]	3
dump[c]	3
h2[c]	3
etha[c]	3
glc-D[e]	3
lcts[e]	3
malt[e]	3
malthp[e]	3
rib-D[e]	3
tre[e]	3
mmmeroacidcyc1ACP[c]	3
mkmeroacidcyc1ACP[c]	3
tmbhn[c]	3
marach[c]	3
ppp9[c]	3
2ahhmd[c]	3
methf[c]	3
gdpfuc[c]	3
PIM1[c]	3
glu5sa[c]	3
1pyr5c[c]	3
ragund[c]	3
gal1p[c]	3
gar[c]	3
lpro[c]	3
dhlpro[c]	3
pram[c]	3
6pgc[c]	3
gdptp[c]	3
35cgmp[c]	3
h2co3[c]	3
hisp[c]	3
hmbil[c]	3
4h2opntn[c]	3
hom-L[c]	3
hxan[c]	3
3ig3p[c]	3
3c2hmp[c]	3
3c3hmp[c]	3
lcts[c]	3
dudp[c]	3
nh4oh[c]	3
o2s[c]	3
ethn[c]	3
fmnh2[c]	3
thmpp[c]	3
pnto-R[c]	3
3php[c]	3
phe-L[c]	3
4ppan[c]	3
ppdima[c]	3
fpram[c]	3
xu5p-D[c]	3
sl26da[c]	3
sl2a6o[c]	3
skm[c]	3
s7p[c]	3
tre6p[c]	3
trp-L[c]	3
uamr[c]	3
hmbpp[c]	3
dad-5[c]	3
mob[e]	3
fo[c]	3
MoaD-SH[c]	3
LAM[c]	3
mthgxl[c]	3
trnaasn[c]	3
asntrna[c]	3
trnagln[c]	3
glntrna[c]	3
phthr[c]	2
acac[c]	2
adocbip[c]	2
agdpcbi[c]	2
chexccoa[c]	2
acgam6p[c]	2
acg5p[c]	2
acorn[c]	2
acg5sa[c]	2
applp[c]	2
itp[c]	2
idp[c]	2
rdmbzi[c]	2
aps[c]	2
dcamp[c]	2
25aics[c]	2
arabinan[c]	2
arabinanagalfragund[c]	2
galfragund[c]	2
gam6p[c]	2
4ahmmp[c]	2
gcald[c]	2
dann[c]	2
pran[c]	2
pmcoa[c]	2
5apru[c]	2
arachcoa[c]	2
argsuc[c]	2
4pasp[c]	2
asn-L[e]	2
cbasp[c]	2
iasp[c]	2
prbatp[c]	2
msh[c]	2
ca2[c]	2
ca2[e]	2
cbl1[c]	2
4c2me[c]	2
2p4c2me[c]	2
ptd1ino160[c]	2
ptd1ino160190[c]	2
3psme[c]	2
cigam[c]	2
fe3[e]	2
fe3[c]	2
2c25dho[c]	2
5odhf2a[c]	2
cobalt2[c]	2
hgbam[c]	2
copre4[c]	2
codhpre6[c]	2
copre8[c]	2
cpppg3[c]	2
pppg9[c]	2
cyan[c]	2
tcynt[c]	2
dcmp[c]	2
cu2[e]	2
cu2[c]	2
26dap-LL[c]	2
db4p[c]	2
decdp-tb[c]	2
decdpr-tb[c]	2
frdp[c]	2
2dda7p[c]	2
2dglcn[c]	2
3ddgc[c]	2
23dhmb[c]	2
23dhdp[c]	2
thdp[c]	2
dhna[c]	2
2ahhmp[c]	2
dhor-S[c]	2
orot[c]	2
6hmhptpp[c]	2
3dhq[c]	2
3dhsk[c]	2
dmpp[c]	2
grdp[c]	2
dpcoa[c]	2
2dhp[c]	2
pant-R[c]	2
ser-D[c]	2
2dr1p[c]	2
2me4p[c]	2
fe2[e]	2
lac-L[e]	2
na1[e]	2
succ[e]	2
prephth[c]	2
meroacidcyc2ACP[c]	2
meroacidcyc2AMP[c]	2
mmeroacidcyc2ACP[c]	2
mmeroacidcyc2AMP[c]	2
kmeroacidcyc2ACP[c]	2
kmeroacidcyc2AMP[c]	2
mmmeroacidcyc1AMP[c]	2
mkmeroacidcyc1AMP[c]	2
m1ocdca[c]	2
dmarach[c]	2
tamocta[c]	2
forcoa[c]	2
5fthf[c]	2
rrppdima[c]	2
PIM5[c]	2
Ac1PIM1[c]	2
Ac1PIM2[c]	2
PIM2[c]	2
dttp[c]	2
glu1sa[c]	2
5aop[c]	2
glu5p[c]	2
udpgalfur[c]	2
gal[c]	2
13dpg[c]	2
alpro[c]	2
gluala[c]	2
glycogen[c]	2
adpglc[c]	2
glu-D[c]	2
glyclt[c]	2
gsn[c]	2
his-L[c]	2
ppbng[c]	2
achms[c]	2
phom[c]	2
suchms[c]	2
iacgam[c]	2
ichor[c]	2
prlp[c]	2
eig3p[c]	2
2cpr5p[c]	2
ile-L[c]	2
2ippm[c]	2
leu-L[c]	2
2mecdp[c]	2
mg2[c]	2
2mop[c]	2
motre[c]	2
5mta[c]	2
meroacidcyc1ACP[c]	2
mmeroacidcyc1ACP[c]	2
kmeroacidcyc1ACP[c]	2
dnad[c]	2
na1[c]	2
5prdmbz[c]	2
quln[c]	2
sbzcoa[c]	2
dgsn[c]	2
orot5p[c]	2
uAgla[c]	2
uaAgla[c]	2
uGgla[c]	2
uaGgla[c]	2
ugmda[c]	2
uagmda[c]	2
pre4[c]	2
pre3b[c]	2
dscl[c]	2
pre3a[c]	2
pre6b[c]	2
pre8[c]	2
hgbyr[c]	2
pdima[c]	2
pgp160[c]	2
pgp160190[c]	2
pgp190[c]	2
uggmda[c]	2
ugggmda[c]	2
4r5au[c]	2
2mahmp[c]	2
pan4p[c]	2
34hpp[c]	2
prbamp[c]	2
prfp[c]	2
skm5p[c]	2
ps160[c]	2
ps180[c]	2
dmlz[c]	2
rppdima[c]	2
2shchc[c]	2
scl[c]	2
sheme[c]	2
sucbz[c]	2
taur[c]	2
aacald[c]	2
dtdp4d6dm[c]	2
tyr-L[c]	2
4mpetz[c]	2
thmmp[c]	2
indole[c]	2
uamag[c]	2
ugmd[c]	2
uaccg[c]	2
uama[c]	2
ugmr[c]	2
ugmag[c]	2
uggmd[c]	2
ugma[c]	2
val-L[c]	2
xylu-D[c]	2
gmhep7p[c]	2
gmhep17bp[c]	2
gmhep1p[c]	2
u1c[c]	2
ggdp[c]	2
hpdp[c]	2
htdp[c]	2
gdpdp[c]	2
micit[c]	2
r5p-D[c]	2
f420-2h2[c]	2
lppg[c]	2
f420-0[c]	2
f420-1[c]	2
f420-3[c]	2
f420-4[c]	2
f420-5[c]	2
MoaD-AMP[c]	2
mobptamp[c]	2
moco[c]	2
lgt-s[c]	2
mettrna[c]	2
trnalys[c]	2
lystrna[c]	2
trnaphe[c]	2
phetrna[c]	2
2agpe160[c]	1
pe160[c]	1
pe180[c]	1
4hthr[c]	1
5dglcn[c]	1
glcn[c]	1
4hbz[c]	1
hexccoa[c]	1
2ahbut[c]	1
apoACP[c]	1
ppa[c]	1
acysbmn[c]	1
appl[c]	1
ametam[c]	1
agm[c]	1
ptrc[c]	1
rhcys[c]	1
fprica[c]	1
sdhlam[c]	1
pac[c]	1
amob[c]	1
ad[c]	1
2dmmq6[c]	1
msa[c]	1
5aprbu[c]	1
mharab-D[c]	1
arg-L[e]	1
btamp[c]	1
ala-B[e]	1
betald[c]	1
bmnmsh[c]	1
cbi[c]	1
glyc[c]	1
cobalt2[e]	1
co2dam[c]	1
copre2[c]	1
copre3[c]	1
copre5[c]	1
copre6[c]	1
cobya[c]	1
co1dam[c]	1
cytd[c]	1
uri[c]	1
cl[e]	1
cl[c]	1
dad-2[c]	1
din[c]	1
ala-D[e]	1
dgmp[c]	1
23dhmp[c]	1
3mop[c]	1
octdp[c]	1
dhnpt[c]	1
6hmhpt[c]	1
25drapp[c]	1
ahdt[c]	1
decdp[c]	1
2dr5p[c]	1
ser-D[e]	1
23dhba[c]	1
seramp[c]	1
enter[c]	1
fum[e]	1
gal[e]	1
gly[e]	1
lys-L[e]	1
mal-L[e]	1
mg2[e]	1
nh4[e]	1
no3[e]	1
orn[e]	1
pdima[e]	1
ppdima[e]	1
pyr[e]	1
ser-L[e]	1
skm[e]	1
tartr-L[e]	1
thr-L[e]	1
prephthcoa[c]	1
omtta[c]	1
mbhn[c]	1
tamlgnc[c]	1
dmbhn[c]	1
dmlgnc[c]	1
pmhexc[c]	1
tmlgnc[c]	1
tmhexc[c]	1
hmocta[c]	1
tamhexc[c]	1
hpmtria[c]	1
pmocta[c]	1
hmtria[c]	1
omdtria[c]	1
hpmdtria[c]	1
fc1p[c]	1
lald-L[c]	1
pheme[c]	1
fol[c]	1
frrppdima[c]	1
PIM6[c]	1
gam1p[c]	1
alpam[c]	1
5oxpro[c]	1
glucys[c]	1
glutrna[c]	1
trnaglu[c]	1
glyc-R[c]	1
harab-D[c]	1
gthox[c]	1
gua[c]	1
xan[c]	1
histd[c]	1
4ampm[c]	1
acgam[c]	1
id3acald[c]	1
indpyr[c]	1
3c4mop[c]	1
4mop[c]	1
mshfald[c]	1
mshfaldox[c]	1
meoh[c]	1
metsox-S-L[c]	1
metsox-R-L[c]	1
5mthf[c]	1
mhpglu[c]	1
hpglu[c]	1
mi3p-D[c]	1
mi4p-D[c]	1
ppal[c]	1
man[c]	1
maltpt[c]	1
mppp9[c]	1
5mtr[c]	1
mycolate[c]	1
mmycolate[c]	1
kmycolate[c]	1
mmmycolate[c]	1
mkmycolate[c]	1
mssg[c]	1
datp[c]	1
ncam[c]	1
dmbzid[c]	1
xtsn[c]	1
thymd[c]	1
ohpb[c]	1
oxalcoa[c]	1
ssaltpp[c]	1
pre5[c]	1
pre6a[c]	1
phthiocerol[c]	1
pdx5p[c]	1
peamn[c]	1
2pglyc[c]	1
phpyr[c]	1
prepphth[c]	1
pphthiocerol[c]	1
ptcys[c]	1
ptth[c]	1
4ppcys[c]	1
cdpdodecg[c]	1
r1p[c]	1
pydxn[c]	1
pydx[c]	1
pydam[c]	1
dtt[c]	1
selcys[c]	1
dttOX[c]	1
seln[c]	1
pre2[c]	1
scl2[c]	1
spmd[c]	1
tartr-L[c]	1
thfglu[c]	1
thm[c]	1
4hba[c]	1
dxyl[c]	1
4mhetz[c]	1
thym[c]	1
uAgl[c]	1
uGgl[c]	1
udpglcur[c]	1
ugagmda[c]	1
uppg1[c]	1
cpppg1[c]	1
gbmh1p-D[c]	1
gamgdp-D[c]	1
nh3[c]	1
adprib[c]	1
ni2[e]	1
ni2[c]	1
mn2[e]	1
mn2[c]	1
2h24pdn[c]	1
5a6rac[c]	1
mgd[c]	1
3hmp[c]	1
arabl-D[c]	1
ManLAM[c]	1
hoa[c]	1
lald[c]	1
trnaala[c]	1
alatrna[c]	1
trnaarg[c]	1
argtrna[c]	1
trnaasp[c]	1
asptrna[c]	1
trnacys[c]	1
cystrna[c]	1
fmettrna[c]	1
trnagly[c]	1
glytrna[c]	1
trnahis[c]	1
histrna[c]	1
trnaile[c]	1
iletrna[c]	1
trnaleu[c]	1
leutrna[c]	1
trnamet[c]	1
trnapro[c]	1
protrna[c]	1
sertrna[sec][c]	1
trnaser[c]	1
sertrna[c]	1
trnasecys[c]	1
trnathr[c]	1
thrtrna[c]	1
trnatrp[c]	1
trptrna[c]	1
trnatyr[c]	1
tyrtrna[c]	1
trnaval[c]	1
valtrna[c]	1
4hbzACP[c]	0
acysbmn[e]	0
5caiz[c]	0
ala-L[e]	0
arab-D[c]	0
tarab-D[c]	0
rbl-D[c]	0
arab-L[c]	0
rbl-L[c]	0
arab-D[e]	0
arab-L[e]	0
arpp[c]	0
asp-L[e]	0
sucarg[c]	0
bmn[c]	0
bmn[e]	0
cit[e]	0
pg160190[c]	0
clpn160190[c]	0
fcmcbtt[c]	0
co2[e]	0
coa[e]	0
co[e]	0
cytd[e]	0
damp[c]	0
decdpa-tb[c]	0
dcyt[c]	0
duri[c]	0
h2mb4p[c]	0
dhpmp[c]	0
4per[c]	0
etha[e]	0
glu-L[e]	0
glyc[e]	0
h2[e]	0
h2co3[e]	0
h2s[e]	0
hdca[e]	0
his-L[e]	0
id3acald[e]	0
ile-L[e]	0
leu-L[e]	0
meoh[e]	0
met-L[e]	0
no[e]	0
o2[e]	0
ocdca[e]	0
pac[e]	0
phdca[e]	0
phe-L[e]	0
ppa[e]	0
trp-L[e]	0
ttdca[e]	0
tyr-L[e]	0
val-L[e]	0
ac[e]	0
4abz[e]	0
for[e]	0
akg[e]	0
oxa[e]	0
gua[e]	0
ad[e]	0
urea[e]	0
phdca[c]	0
phdcacoa[c]	0
homtta[c]	0
fmcbtt[c]	0
Ac1PIM3[c]	0
Ac1PIM4[c]	0
PIM3[c]	0
oxa[c]	0
Ac2PIM2[c]	0
mndn[c]	0
rmyc[c]	0
no[c]	0
pat[c]	0
mfrrppdima[c]	0
pg160[c]	0
pg190[c]	0
phthclh2[c]	0
phthcl[c]	0
phthdl[c]	0
pphthdl[c]	0
ru5p-L[c]	0
sucorn[c]	0
sucglu[c]	0
sucgsa[c]	0
tat[c]	0
sl1[c]	0
tdm1[c]	0
tdm2[c]	0
tdm3[c]	0
tdm4[c]	0
tmha1[c]	0
tmha2[c]	0
tmha3[c]	0
tmha4[c]	0
tmha5[c]	0
tmha6[c]	0
triat[c]	0
gbmh17p-D[c]	0
adphep-DD[c]	0
adphep-LD[c]	0
ptdp[c]	0
gln[e]	0
2plac-L[c]	0
hla[c]	0
selnp[c]	0
sectrna[c]	0

## Sheet: Table.S3
Genes	Reaction Connectivity
Rv1323	33
Rv0468	32
Rv0859	32
Rv0215c	28
Rv0752c	28
Rv0873	28
Rv2789c	28
Rv3274c	28
Rv3563	28
Rv3564	28
Rv0131c	27
Rv0154c	27
Rv0231	27
Rv0244c	27
Rv0271c	27
Rv0400c	27
Rv0972c	27
Rv0975c	27
Rv1346	27
Rv1467c	27
Rv1679	27
Rv1933c	27
Rv1934c	27
Rv2724c	27
Rv3061c	27
Rv3139	27
Rv3140	27
Rv3504	27
Rv3505	27
Rv3543c	27
Rv3544c	27
Rv3560c	27
Rv3562	27
Rv3573c	27
Rv3761c	27
Rv3797	27
Rv0672	27
Rv2500c	27
Rv0222	27
Rv0456c	27
Rv0632c	27
Rv0673	27
Rv0675	27
Rv0971c	27
Rv1070c	27
Rv1071c	27
Rv1141c	27
Rv1142c	27
Rv1472	27
Rv1935c	27
Rv2486	27
Rv2679	27
Rv2831	27
Rv3039c	27
Rv3516	27
Rv3550	27
Rv3774	27
Rv0905	27
Rv3374	27
Rv3373	27
Rv1715	27
Rv1912c	27
Rv3141	27
Rv0243	27
Rv1074c	27
Rv3546	27
Rv3556c	27
Rv2940c	16
Rv1350	11
Rv2524c	11
Rv1484	11
Rv2947c	11
Rv2445c	9
Rv3826	7
Rv1529	7
Rv0644c	7
Rv3307	7
Rv1236	6
Rv1237	6
Rv1238	6
Rv3261	6
Rv3262	6
Rv3801c	5
Rv0860	5
Rv1144	5
Rv1663	5
Rv1662	5
Rv0422c	5
Rv3800c	5
Rv2847c	5
Rv0733	4
Rv3330	4
Rv3756c	4
Rv3757c	4
Rv3758c	4
Rv3759c	4
Rv2066	4
Rv1704c	4
Rv1618	4
Rv1878	4
Rv2220	4
Rv2222c	4
Rv2860c	4
Rv1257c	4
Rv0503c	4
Rv0082	4
Rv3145	4
Rv3146	4
Rv3147	4
Rv3148	4
Rv3149	4
Rv3150	4
Rv3151	4
Rv3152	4
Rv3153	4
Rv3154	4
Rv3155	4
Rv3156	4
Rv3157	4
Rv3158	4
Rv2156c	4
Rv2607	4
Rv1391	4
Rv1981c	4
Rv2153c	4
Rv2157c	4
Rv2604c	4
Rv2606c	4
Rv0254c	3
Rv3280	3
Rv2202c	3
Rv1285	3
Rv1286	3
Rv2182c	3
Rv2483c	3
Rv2320c	3
Rv1589	3
Rv1908c	3
Rv2849c	3
Rv2289	3
Rv1712	3
Rv2881c	3
Rv2139	3
Rv3398c	3
Rv2211c	3
Rv3316	3
Rv3317	3
Rv3318	3
Rv3319	3
Rv0247c	3
Rv0248c	3
Rv2443	3
Rv2855	3
Rv2210c	3
Rv3264c	3
Rv2378c	3
Rv2379c	3
Rv2380c	3
Rv2381c	3
Rv2382c	3
Rv2383c	3
Rv2384	3
Rv1604	3
Rv0753c	3
Rv3356c	3
Rv0470c	3
Rv1483	3
Rv2245	3
Rv2246	3
Rv0098	3
Rv0252	3
Rv0253	3
Rv2391	3
Rv0555	3
Rv0462	3
Rv0843	3
Rv1822	3
Rv2746c	3
Rv2163c	3
Rv0016c	3
Rv2911	3
Rv3627c	3
Rv1612	3
Rv1613	3
Rv2361c	3
Rv1635c	3
Rv1295	2
Rv2573	2
Rv3441c	2
Rv1653	2
Rv1475c	2
Rv3667	2
Rv2236c	2
Rv2848c	2
Rv2435c	2
Rv0777	2
Rv0091	2
Rv0957	2
Rv3257c	2
Rv2215	2
Rv1895	2
Rv2531c	2
Rv1595	2
Rv1304	2
Rv1305	2
Rv1306	2
Rv1307	2
Rv1308	2
Rv1309	2
Rv1310	2
Rv1311	2
Rv2612c	2
Rv1239c	2
Rv0373c	2
Rv0374c	2
Rv0375c	2
Rv2071c	2
Rv2072c	2
Rv2070c	2
Rv2065	2
Rv1131	2
Rv1699	2
Rv3340	2
Rv1620c	2
Rv1621c	2
Rv1622c	2
Rv1623c	2
Rv0092	2
Rv0103c	2
Rv2136c	2
Rv0321	2
Rv1928c	2
Rv1389	2
Rv2763c	2
Rv2447c	2
Rv0534c	2
Rv3607c	2
Rv1409	2
Rv1207	2
Rv3608c	2
Rv2697c	2
Rv1185c	2
Rv2590	2
Rv2131c	2
Rv1348	2
Rv1349	2
Rv2786c	2
Rv1552	2
Rv1553	2
Rv1554	2
Rv1555	2
Rv3106	2
Rv0886	2
Rv1018c	2
Rv1551	2
Rv2427c	2
Rv2051c	2
Rv2583c	2
Rv3273	2
Rv3588c	2
Rv0511	2
Rv1294	2
Rv0467	2
Rv2987c	2
Rv2988c	2
Rv3001c	2
Rv0694	2
Rv0183	2
Rv1872c	2
Rv1902c	2
Rv2611c	2
Rv0642c	2
Rv0645c	2
Rv1737c	2
Rv1161	2
Rv1162	2
Rv1163	2
Rv1164	2
Rv1736c	2
Rv1160	2
Rv2344c	2
Rv0884c	2
Rv1248c	2
Rv0500	2
Rv1755c	2
Rv0805	2
Rv2941	2
Rv2945c	2
Rv0211	2
Rv1092c	2
Rv3838c	2
Rv1603	2
Rv2928	2
Rv2931	2
Rv2932	2
Rv2933	2
Rv2934	2
Rv2935	2
Rv0437c	2
Rv0436c	2
Rv1412	2
Rv1416	2
Rv0570	2
Rv3048c	2
Rv3051c	2
Rv3052c	2
Rv3053c	2
Rv3113	2
Rv0069c	2
Rv0391	2
Rv1079	2
Rv0234c	2
Rv1731	2
Rv1739c	2
Rv2397c	2
Rv2398c	2
Rv2399c	2
Rv2400c	2
Rv3634c	2
Rv0417	2
Rv1449c	2
Rv2158c	2
Rv2155c	2
Rv2152c	2
Rv2678c	2
Rv0114	2
Rv2181	2
Rv0577	2
Rv0911	2
Rv3009c	2
Rv3011c	2
Rv3012c	2
Rv3834c	2
Rv3815c	1
Rv2589	1
Rv3290c	1
Rv1867	1
Rv3535c	1
Rv0904c	1
Rv3281	1
Rv1722	1
Rv1302	1
Rv1654	1
Rv2747	1
Rv0409	1
Rv1820	1
Rv3002c	1
Rv3509c	1
Rv3003c	1
Rv3470c	1
Rv2922A	1
Rv1655	1
Rv3310	1
Rv2523c	1
Rv3313c	1
Rv0812	1
Rv0013	1
Rv1005c	1
Rv0255c	1
Rv3713	1
Rv1318c	1
Rv1319c	1
Rv1320c	1
Rv1625c	1
Rv1647	1
Rv1264	1
Rv2212	1
Rv1120c	1
Rv1900c	1
Rv3377c	1
Rv3645	1
Rv2208	1
Rv2584c	1
Rv0357c	1
Rv3794	1
Rv3795	1
Rv3792	1
Rv3332	1
Rv1652	1
Rv3248c	1
Rv0423c	1
Rv3276c	1
Rv3275c	1
Rv2981c	1
Rv2780	1
Rv3423c	1
Rv2148c	1
Rv2259	1
Rv3045	1
Rv2858c	1
Rv0768	1
Rv3293	1
Rv0147	1
Rv0458	1
Rv1568	1
Rv2363	1
Rv0558	1
Rv2467	1
Rv2192c	1
Rv1609	1
Rv2859c	1
Rv1569	1
Rv0032	1
Rv2671	1
Rv1001	1
Rv1659	1
Rv1658	1
Rv3708c	1
Rv1538c	1
Rv2201	1
Rv2127	1
Rv0346c	1
Rv3601c	1
Rv1380	1
Rv3709c	1
Rv3565	1
Rv0337c	1
Rv2121c	1
Rv3279c	1
Rv0522	1
Rv0223c	1
Rv0107c	1
Rv1607	1
Rv1314c	1
Rv1383	1
Rv1384	1
Rv1011	1
Rv1885c	1
Rv0948c	1
Rv2540c	1
Rv2949c	1
Rv2130c	1
Rv2498c	1
Rv3075c	1
Rv0771	1
Rv0464c	1
Rv2062c	1
Rv2388c	1
Rv0889c	1
Rv0896	1
Rv3283	1
Rv0390	1
Rv2194	1
Rv2195	1
Rv2196	1
Rv1451	1
Rv2193	1
Rv2200c	1
Rv3043c	1
Rv0848	1
Rv1336	1
Rv2334	1
Rv0075	1
Rv1077	1
Rv3315c	1
Rv0143c	1
Rv0499	1
Rv2252	1
Rv1905c	1
Rv1293	1
Rv2726c	1
Rv2482c	1
Rv1570	1
Rv3807c	1
Rv3790	1
Rv3791	1
Rv3806c	1
Rv2178c	1
Rv3229c	1
Rv1094	1
Rv0824c	1
Rv1714	1
Rv0189c	1
Rv2773c	1
Rv2753c	1
Rv1381	1
Rv2537c	1
Rv2538c	1
Rv1631	1
Rv0478	1
Rv3247c	1
Rv2870c	1
Rv2682c	1
Rv3379c	1
Rv1023	1
Rv3214	1
Rv0099	1
Rv2930	1
Rv0533c	1
Rv0363c	1
Rv1099c	1
Rv0727c	1
Rv1485	1
Rv2605c	1
Rv2899c	1
Rv2900c	1
Rv0087	1
Rv0084	1
Rv2331	1
Rv2454c	1
Rv2455c	1
Rv0763c	1
Rv0085	1
Rv2957	1
Rv0992c	1
Rv2964	1
Rv1098c	1
Rv2610c	1
Rv1500	1
Rv0557	1
Rv2188c	1
Rv1159	1
Rv0334	1
Rv0524	1
Rv0564c	1
Rv2249c	1
Rv2982c	1
Rv3302c	1
Rv1447c	1
Rv1121	1
Rv3808c	1
Rv0620	1
Rv0618	1
Rv0619	1
Rv0993	1
Rv3331	1
Rv1436	1
Rv0956	1
Rv0389	1
Rv1832	1
Rv0794c	1
Rv3303c	1
Rv3436c	1
Rv1512	1
Rv1508A	1
Rv1093	1
Rv0070c	1
Rv1328	1
Rv1326c	1
Rv1213	1
Rv2439c	1
Rv3704c	1
Rv3432c	1
Rv2476c	1
Rv1602	1
Rv0808	1
Rv1338	1
Rv3858c	1
Rv3859c	1
Rv0509	1
Rv2832c	1
Rv2833c	1
Rv2834c	1
Rv2835c	1
Rv2205c	1
Rv1826	1
Rv0811c	1
Rv3696c	1
Rv0112	1
Rv1511	1
Rv3396c	1
Rv1844c	1
Rv1122	1
Rv0317c	1
Rv2277c	1
Rv3842c	1
Rv1086	1
Rv1280c	1
Rv1281c	1
Rv1282c	1
Rv1283c	1
Rv0773c	1
Rv2394	1
Rv3609c	1
Rv1415	1
Rv1940	1
Rv0386	1
Rv1284	1
Rv2458	1
Rv0650	1
Rv1599	1
Rv0510	1
Rv3469c	1
Rv3534c	1
Rv3606c	1
Rv3341	1
Rv1296	1
Rv1600	1
Rv2231c	1
Rv3772	1
Rv3624c	1
Rv0486	1
Rv3339c	1
Rv0066c	1
Rv3215	1
Rv1915	1
Rv1916	1
Rv1605	1
Rv1170	1
Rv1601	1
Rv1611	1
Rv1843c	1
Rv3410c	1
Rv3411c	1
Rv0853c	1
Rv3393	1
Rv1745c	1
Rv2995c	1
Rv3710	1
Rv1029	1
Rv1030	1
Rv1031	1
Rv2691	1
Rv2692	1
Rv2316	1
Rv2317	1
Rv2318	1
Rv0191	1
Rv1837c	1
Rv2471	1
Rv3255c	1
Rv3256c	1
Rv1347c	1
Rv2243	1
Rv2244	1
Rv0649	1
Rv1240	1
Rv2332	1
Rv3581c	1
Rv3582c	1
Rv1392	1
Rv2124c	1
Rv0137c	1
Rv2674	1
Rv1133c	1
Rv2701c	1
Rv3137	1
Rv0046c	1
Rv0855	1
Rv1322A	1
Rv1492	1
Rv1493	1
Rv1692	1
Rv2225	1
Rv1562c	1
Rv1563c	1
Rv0958	1
Rv1082	1
Rv0819	1
Rv0126	1
Rv1695	1
Rv2438c	1
Rv0155	1
Rv0156	1
Rv0157	1
Rv3236c	1
Rv0573c	1
Rv1330c	1
Rv0261c	1
Rv0267	1
Rv2329c	1
Rv2287	1
Rv2920c	1
Rv2043c	1
Rv2421c	1
Rv2207	1
Rv1596	1
Rv0021c	1
Rv1533	1
Rv1894c	1
Rv0548c	1
Rv1525	1
Rv3265c	1
Rv1656	1
Rv2503c	1
Rv2504c	1
Rv1385	1
Rv0266c	1
Rv2321c	1
Rv2322c	1
Rv0382c	1
Rv0118c	1
Rv1187	1
Rv3602c	1
Rv2392	1
Rv2967c	1
Rv2241	1
Rv2496c	1
Rv2497c	1
Rv2495c	1
Rv2029c	1
Rv3010c	1
Rv0728c	1
Rv2996c	1
Rv0946c	1
Rv1437	1
Rv1445c	1
Rv2233	1
Rv0489	1
Rv2419c	1
Rv2135c	1
Rv3068c	1
Rv3400	1
Rv0936	1
Rv0820	1
Rv0545c	1
Rv2281	1
Rv3308	1
Rv3600c	1
Rv3628	1
Rv0512	1
Rv0973c	1
Rv0974c	1
Rv2502c	1
Rv2247	1
Rv2501c	1
Rv3285	1
Rv1127c	1
Rv2702	1
Rv2984	1
Rv3754	1
Rv2677c	1
Rv0772	1
Rv0809	1
Rv1606	1
Rv0780	1
Rv2122c	1
Rv0788	1
Rv0803	1
Rv1188	1
Rv1017c	1
Rv3227	1
Rv0505c	1
Rv3042c	1
Rv0408	1
Rv3914	1
Rv2965c	1
Rv0121c	1
Rv1155	1
Rv2074	1
Rv1617	1
Rv0162c	1
Rv3777	1
Rv1594	1
Rv2064	1
Rv2436	1
Rv1408	1
Rv2465c	1
Rv2962c	1
Rv2958c	1
Rv2386c	1
Rv1202	1
Rv0858c	1
Rv1178	1
Rv1464	1
Rv2335	1
Rv2393	1
Rv2552c	1
Rv2539c	1
Rv1200	1
Rv2601	1
Rv3846	1
Rv0432	1
Rv0542c	1
Rv0553	1
Rv0951	1
Rv0952	1
Rv2331A	1
Rv1707	1
Rv1448c	1
Rv1672c	1
Rv3406	1
Rv0097	1
Rv3465	1
Rv3266c	1
Rv3784	1
Rv3464	1
Rv3468c	1
Rv1201c	1
Rv1559	1
Rv3737	1
Rv3314c	1
Rv2754c	1
Rv2764c	1
Rv2977c	1
Rv0414c	1
Rv1438	1
Rv3913	1
Rv2006	1
Rv3372	1
Rv3490	1
Rv1373	1
Rv0295c	1
Rv3529c	1
Rv2267c	1
Rv1315	1
Rv2852c	1
Rv3818	1
Rv0482	1
Rv0501	1
Rv0536	1
Rv0806c	1
Rv3809c	1
Rv0322	1
Rv2883c	1
Rv0260c	1
Rv1379	1
Rv3309c	1
Rv1848	1
Rv1849	1
Rv1850	1
Rv0729	1
Rv0498	1
Rv2793c	1
Rv3455c	1
Rv1711	1
Rv1540	1
Rv3300c	1
Rv0113	1
Rv0115	1
Rv0263c	1
Rv0264c	1
Rv2868c	1
Rv1110	1
Rv3382c	1
Rv0562	1
Rv0989c	1
Rv1026	1
Rv0496	1
Rv1130	1
Rv0392c	1
Rv1812c	1
Rv1854c	1
Rv1700	1
Rv0072	1
Rv0073	1
Rv0411c	1
Rv2564	1
Rv3401	1
Rv2218	1
Rv2856	1
Rv0924c	1
Rv3536c	1
Rv1857	1
Rv1858	1
Rv1859	1
Rv0407	1
Rv0132c	1
Rv1173	1
Rv3109	1
Rv0869c	1
Rv3111	1
Rv0864	1
Rv3324c	1
Rv3112	1
Rv0868c	1
Rv3119	1
Rv0866	1
Rv3323c	1
Rv0865	1
Rv0994	1
Rv2453c	1
Rv0751c	1
Rv1166	1
Rv2174	1
Rv3793	1
Rv2298	1
Rv3684	1
Rv0684	1
Rv3025c	1
Rv2555c	1
Rv1292	1
Rv2572c	1
Rv3580c	1
Rv1406	1
Rv2357c	1
Rv2580c	1
Rv1536	1
Rv0041	1
Rv1640c	1
Rv3598c	1
Rv1007c	1
Rv1649	1
Rv1650	1
Rv2845c	1
Rv2614c	1
Rv3336c	1
Rv1689	1
Rv2448c	1
Rv0306	0

## Sheet: Table.S4
RNA-Seq Sense_AS_Active Genes	Model_Active_Genes	Model_Active_Genes_RPKM
Rv0001	Rv0016c	RPKM > 5
Rv0002	Rv0046c	RPKM > 5
Rv0003	Rv0066c	RPKM > 5
Rv0004	Rv0070c	RPKM > 5
Rv0005	Rv0075	RPKM > 5
Rv0006	Rv0082	RPKM > 5
Rv0007	Rv0084	RPKM > 5
Rv0008c	Rv0085	RPKM > 5
Rv0009	Rv0098	RPKM > 5
Rv0010c	Rv0099	RPKM > 5
Rv0011c	Rv0112	RPKM > 5
Rv0012	Rv0189c	RPKM > 5
Rv0013	Rv0211	RPKM > 5
Rv0014c	Rv0247c	RPKM > 5
Rv0015c	Rv0248c	RPKM > 5
Rv0016c	Rv0295c	RPKM > 5
Rv0017c	Rv0334	RPKM > 5
Rv0018c	Rv0337c	RPKM > 5
Rv0019c	Rv0357c	RPKM > 5
Rv0020c	Rv0363c	RPKM > 5
Rv0021c	Rv0382c	RPKM > 5
Rv0024	Rv0389	#N/A
Rv0025	Rv0391	RPKM > 5
Rv0026	Rv0436c	RPKM > 5
Rv0027	Rv0437c	RPKM > 5
Rv0028	Rv0467	RPKM > 5
Rv0029	Rv0470c	RPKM > 5
Rv0030	Rv0482	RPKM > 5
Rv0033	Rv0489	RPKM > 5
Rv0034	Rv0500	RPKM > 5
Rv0035	Rv0501	RPKM > 5
Rv0036c	Rv0503c	RPKM > 5
Rv0037c	Rv0505c	RPKM > 5
Rv0038	Rv0533c	RPKM > 5
Rv0039c	Rv0536	RPKM > 5
Rv0040c	Rv0545c	RPKM > 5
Rv0041	Rv0557	RPKM > 5
Rv0042c	Rv0564c	RPKM > 5
Rv0043c	Rv0570	#N/A
Rv0044c	Rv0618	RPKM > 5
Rv0045c	Rv0619	#N/A
Rv0046c	Rv0620	#N/A
Rv0047c	Rv0642c	RPKM > 5
Rv0048c	Rv0644c	RPKM > 5
Rv0049	Rv0645c	RPKM > 5
Rv0050	Rv0649	#N/A
Rv0051	Rv0694	RPKM > 5
Rv0052	Rv0728c	#N/A
Rv0053	Rv0733	RPKM > 5
Rv0054	Rv0763c	RPKM > 5
Rv0055	Rv0772	RPKM > 5
Rv0056	Rv0777	RPKM > 5
Rv0057	Rv0780	RPKM > 5
Rv0058	Rv0788	RPKM > 5
Rv0059	Rv0803	RPKM > 5
Rv0060	Rv0806c	RPKM > 5
Rv0061	Rv0808	RPKM > 5
Rv0062	Rv0809	RPKM > 5
Rv0063	Rv0824c	RPKM > 5
Rv0064	Rv0855	RPKM > 5
Rv0065	Rv0858c	RPKM > 5
Rv0066c	Rv0884c	RPKM > 5
Rv0069c	Rv0886	#N/A
Rv0070c	Rv0904c	RPKM > 5
Rv0072	Rv0946c	RPKM > 5
Rv0073	Rv0948c	RPKM > 5
Rv0074	Rv0951	RPKM > 5
Rv0075	Rv0952	RPKM > 5
Rv0076c	Rv0956	RPKM > 5
Rv0078	Rv0957	RPKM > 5
Rv0078A	Rv0993	RPKM > 5
Rv0080	Rv1001	RPKM > 5
Rv0082	Rv1011	RPKM > 5
Rv0083	Rv1017c	RPKM > 5
Rv0084	Rv1018c	RPKM > 5
Rv0085	Rv1023	RPKM > 5
Rv0086	Rv1079	RPKM > 5
Rv0087	Rv1086	RPKM > 5
Rv0088	Rv1093	RPKM > 5
Rv0089	Rv1094	RPKM > 5
Rv0091	Rv1098c	RPKM > 5
Rv0092	Rv1110	RPKM > 5
Rv0096	Rv1159	RPKM > 5
Rv0097	Rv1178	RPKM > 5
Rv0098	Rv1185c	RPKM > 5
Rv0099	Rv1201c	RPKM > 5
Rv0100	Rv1202	RPKM > 5
Rv0101	Rv1236	RPKM > 5
Rv0102	Rv1237	RPKM > 5
Rv0103c	Rv1238	RPKM > 5
Rv0107c	Rv1240	RPKM > 5
Rv0108c	Rv1284	RPKM > 5
Rv0109	Rv1285	RPKM > 5
Rv0110	Rv1286	RPKM > 5
Rv0111	Rv1293	RPKM > 5
Rv0112	Rv1294	RPKM > 5
Rv0115	Rv1302	RPKM > 5
Rv0116c	Rv1304	RPKM > 5
Rv0118c	Rv1305	RPKM > 5
Rv0119	Rv1306	RPKM > 5
Rv0120c	Rv1307	RPKM > 5
Rv0125	Rv1308	RPKM > 5
Rv0126	Rv1309	RPKM > 5
Rv0127	Rv1310	RPKM > 5
Rv0128	Rv1311	RPKM > 5
Rv0129c	Rv1315	RPKM > 5
Rv0130	Rv1322A	RPKM > 5
Rv0131c	Rv1323	RPKM > 5
Rv0133	Rv1338	RPKM > 5
Rv0134	Rv1350	#N/A
Rv0135c	Rv1373	#N/A
Rv0136	Rv1380	RPKM > 5
Rv0137c	Rv1381	RPKM > 5
Rv0138	Rv1383	RPKM > 5
Rv0139	Rv1384	RPKM > 5
Rv0140	Rv1385	RPKM > 5
Rv0141c	Rv1389	RPKM > 5
Rv0142	Rv1392	RPKM > 5
Rv0143c	Rv1408	RPKM > 5
Rv0144	Rv1436	RPKM > 5
Rv0145	Rv1437	RPKM > 5
Rv0146	Rv1438	RPKM > 5
Rv0147	Rv1448c	RPKM > 5
Rv0148	Rv1449c	RPKM > 5
Rv0149	Rv1475c	RPKM > 5
Rv0153c	Rv1483	RPKM > 5
Rv0154c	Rv1484	RPKM > 5
Rv0155	Rv1492	RPKM > 5
Rv0156	Rv1493	RPKM > 5
Rv0157	Rv1500	RPKM > 5
Rv0157A	Rv1508A	RPKM > 5
Rv0159c	Rv1511	RPKM > 5
Rv0164	Rv1512	RPKM > 5
Rv0165c	Rv1525	RPKM > 5
Rv0166	Rv1529	RPKM > 5
Rv0167	Rv1551	#N/A
Rv0168	Rv1559	RPKM > 5
Rv0169	Rv1589	RPKM > 5
Rv0170	Rv1599	RPKM > 5
Rv0171	Rv1600	RPKM > 5
Rv0172	Rv1601	RPKM > 5
Rv0173	Rv1602	RPKM > 5
Rv0174	Rv1603	RPKM > 5
Rv0175	Rv1604	RPKM > 5
Rv0176	Rv1605	RPKM > 5
Rv0177	Rv1606	RPKM > 5
Rv0178	Rv1609	RPKM > 5
Rv0179c	Rv1611	RPKM > 5
Rv0180c	Rv1612	RPKM > 5
Rv0181c	Rv1613	RPKM > 5
Rv0182c	Rv1617	RPKM > 5
Rv0183	Rv1618	RPKM > 5
Rv0184	Rv1620c	RPKM > 5
Rv0185	Rv1621c	RPKM > 5
Rv0186	Rv1622c	RPKM > 5
Rv0187	Rv1623c	RPKM > 5
Rv0188	Rv1652	RPKM > 5
Rv0189c	Rv1653	RPKM > 5
Rv0190	Rv1654	RPKM > 5
Rv0191	Rv1655	RPKM > 5
Rv0192	Rv1656	RPKM > 5
Rv0192A	Rv1662	RPKM > 5
Rv0196	Rv1663	RPKM > 5
Rv0197	Rv1692	RPKM > 5
Rv0198c	Rv1695	RPKM > 5
Rv0199	Rv1699	RPKM > 5
Rv0200	Rv1707	RPKM > 5
Rv0201c	Rv1712	RPKM > 5
Rv0202c	Rv1722	RPKM > 5
Rv0203	Rv1739c	#N/A
Rv0204c	Rv1745c	RPKM > 5
Rv0205	Rv1820	RPKM > 5
Rv0206c	Rv1822	RPKM > 5
Rv0207c	Rv1837c	RPKM > 5
Rv0208c	Rv1843c	RPKM > 5
Rv0211	Rv1867	#N/A
Rv0212c	Rv1878	#N/A
Rv0214	Rv1885c	RPKM > 5
Rv0215c	Rv1902c	RPKM > 5
Rv0216	Rv1915	RPKM > 5
Rv0217c	Rv1916	RPKM > 5
Rv0220	Rv1981c	RPKM > 5
Rv0221	Rv2006	#N/A
Rv0222	Rv2029c	#N/A
Rv0223c	Rv2051c	RPKM > 5
Rv0224c	Rv2121c	#N/A
Rv0225	Rv2122c	#N/A
Rv0226c	Rv2124c	RPKM > 5
Rv0227c	Rv2131c	RPKM > 5
Rv0228	Rv2135c	RPKM > 5
Rv0229c	Rv2136c	RPKM > 5
Rv0230c	Rv2139	RPKM > 5
Rv0231	Rv2148c	RPKM > 5
Rv0232	Rv2152c	RPKM > 5
Rv0233	Rv2153c	RPKM > 5
Rv0234c	Rv2155c	RPKM > 5
Rv0236A	Rv2156c	RPKM > 5
Rv0236c	Rv2157c	RPKM > 5
Rv0237	Rv2158c	RPKM > 5
Rv0238	Rv2163c	RPKM > 5
Rv0239	Rv2178c	RPKM > 5
Rv0240	Rv2182c	RPKM > 5
Rv0241c	Rv2188c	RPKM > 5
Rv0242c	Rv2192c	RPKM > 5
Rv0243	Rv2201	RPKM > 5
Rv0244c	Rv2202c	RPKM > 5
Rv0245	Rv2210c	RPKM > 5
Rv0247c	Rv2220	RPKM > 5
Rv0248c	Rv2222c	RPKM > 5
Rv0249c	Rv2231c	RPKM > 5
Rv0250c	Rv2243	RPKM > 5
Rv0251c	Rv2244	RPKM > 5
Rv0255c	Rv2245	RPKM > 5
Rv0256c	Rv2246	RPKM > 5
Rv0262c	Rv2249c	#N/A
Rv0263c	Rv2267c	RPKM > 5
Rv0264c	Rv2281	#N/A
Rv0265c	Rv2331	RPKM > 5
Rv0268c	Rv2331A	RPKM > 5
Rv0270	Rv2361c	RPKM > 5
Rv0271c	Rv2378c	RPKM > 5
Rv0272c	Rv2379c	#N/A
Rv0273c	Rv2380c	RPKM > 5
Rv0274	Rv2381c	#N/A
Rv0275c	Rv2382c	#N/A
Rv0276	Rv2383c	#N/A
Rv0277c	Rv2384	#N/A
Rv0279c	Rv2386c	#N/A
Rv0281	Rv2392	RPKM > 5
Rv0282	Rv2397c	RPKM > 5
Rv0283	Rv2398c	#N/A
Rv0284	Rv2399c	RPKM > 5
Rv0285	Rv2400c	RPKM > 5
Rv0286	Rv2419c	RPKM > 5
Rv0287	Rv2427c	RPKM > 5
Rv0288	Rv2439c	#N/A
Rv0289	Rv2443	RPKM > 5
Rv0290	Rv2445c	RPKM > 5
Rv0291	Rv2454c	RPKM > 5
Rv0292	Rv2455c	RPKM > 5
Rv0293c	Rv2465c	RPKM > 5
Rv0295c	Rv2476c	RPKM > 5
Rv0296c	Rv2482c	RPKM > 5
Rv0297	Rv2483c	RPKM > 5
Rv0298	Rv2498c	RPKM > 5
Rv0299	Rv2503c	RPKM > 5
Rv0300	Rv2504c	RPKM > 5
Rv0301	Rv2524c	RPKM > 5
Rv0302	Rv2537c	RPKM > 5
Rv0303	Rv2538c	RPKM > 5
Rv0305c	Rv2539c	RPKM > 5
Rv0307c	Rv2540c	RPKM > 5
Rv0308	Rv2552c	RPKM > 5
Rv0309	Rv2584c	RPKM > 5
Rv0310c	Rv2590	RPKM > 5
Rv0312	Rv2610c	RPKM > 5
Rv0313	Rv2611c	RPKM > 5
Rv0314c	Rv2612c	RPKM > 5
Rv0315	Rv2682c	RPKM > 5
Rv0316	Rv2701c	RPKM > 5
Rv0317c	Rv2702	RPKM > 5
Rv0321	Rv2726c	RPKM > 5
Rv0323c	Rv2746c	RPKM > 5
Rv0328	Rv2753c	RPKM > 5
Rv0331	Rv2754c	RPKM > 5
Rv0332	Rv2763c	RPKM > 5
Rv0333	Rv2764c	RPKM > 5
Rv0334	Rv2773c	RPKM > 5
Rv0337c	Rv2852c	RPKM > 5
Rv0338c	Rv2859c	RPKM > 5
Rv0340	Rv2860c	RPKM > 5
Rv0341	Rv2868c	RPKM > 5
Rv0342	Rv2870c	RPKM > 5
Rv0343	Rv2881c	RPKM > 5
Rv0344c	Rv2883c	RPKM > 5
Rv0345	Rv2911	RPKM > 5
Rv0346c	Rv2920c	#N/A
Rv0347	Rv2928	RPKM > 5
Rv0348	Rv2930	RPKM > 5
Rv0349	Rv2931	RPKM > 5
Rv0350	Rv2932	RPKM > 5
Rv0351	Rv2933	RPKM > 5
Rv0352	Rv2934	RPKM > 5
Rv0353	Rv2935	RPKM > 5
Rv0354c	Rv2940c	RPKM > 5
Rv0355c	Rv2941	RPKM > 5
Rv0356c	Rv2947c	RPKM > 5
Rv0357c	Rv2949c	RPKM > 5
Rv0360c	Rv2957	RPKM > 5
Rv0361	Rv2958c	RPKM > 5
Rv0363c	Rv2962c	RPKM > 5
Rv0364	Rv2981c	RPKM > 5
Rv0366c	Rv2982c	RPKM > 5
Rv0367c	Rv2987c	RPKM > 5
Rv0379	Rv2988c	RPKM > 5
Rv0380c	Rv2995c	RPKM > 5
Rv0381c	Rv2996c	RPKM > 5
Rv0382c	Rv3001c	RPKM > 5
Rv0383c	Rv3002c	RPKM > 5
Rv0384c	Rv3003c	RPKM > 5
Rv0390	Rv3010c	RPKM > 5
Rv0391	Rv3025c	RPKM > 5
Rv0392c	Rv3042c	RPKM > 5
Rv0394c	Rv3048c	RPKM > 5
Rv0399c	Rv3051c	RPKM > 5
Rv0400c	Rv3052c	RPKM > 5
Rv0402c	Rv3053c	RPKM > 5
Rv0403c	Rv3068c	RPKM > 5
Rv0404	Rv3075c	RPKM > 5
Rv0405	Rv3106	RPKM > 5
Rv0406c	Rv3137	RPKM > 5
Rv0407	Rv3145	RPKM > 5
Rv0408	Rv3146	RPKM > 5
Rv0409	Rv3147	RPKM > 5
Rv0410c	Rv3148	RPKM > 5
Rv0411c	Rv3149	RPKM > 5
Rv0412c	Rv3150	RPKM > 5
Rv0413	Rv3151	RPKM > 5
Rv0415	Rv3152	RPKM > 5
Rv0416	Rv3153	RPKM > 5
Rv0417	Rv3154	RPKM > 5
Rv0418	Rv3155	RPKM > 5
Rv0419	Rv3156	RPKM > 5
Rv0420c	Rv3157	RPKM > 5
Rv0421c	Rv3158	RPKM > 5
Rv0422c	Rv3227	RPKM > 5
Rv0423c	Rv3247c	RPKM > 5
Rv0424c	Rv3248c	RPKM > 5
Rv0425c	Rv3255c	RPKM > 5
Rv0426c	Rv3256c	RPKM > 5
Rv0427c	Rv3257c	RPKM > 5
Rv0428c	Rv3264c	RPKM > 5
Rv0429c	Rv3265c	RPKM > 5
Rv0430	Rv3266c	RPKM > 5
Rv0431	Rv3273	RPKM > 5
Rv0432	Rv3275c	RPKM > 5
Rv0433	Rv3276c	RPKM > 5
Rv0434	Rv3280	RPKM > 5
Rv0435c	Rv3281	RPKM > 5
Rv0436c	Rv3302c	RPKM > 5
Rv0437c	Rv3307	RPKM > 5
Rv0438c	Rv3308	RPKM > 5
Rv0439c	Rv3316	RPKM > 5
Rv0440	Rv3317	RPKM > 5
Rv0441c	Rv3318	RPKM > 5
Rv0442c	Rv3319	RPKM > 5
Rv0443	Rv3330	RPKM > 5
Rv0444c	Rv3339c	RPKM > 5
Rv0445c	Rv3340	RPKM > 5
Rv0446c	Rv3341	RPKM > 5
Rv0447c	Rv3356c	RPKM > 5
Rv0450c	Rv3372	RPKM > 5
Rv0451c	Rv3379c	#N/A
Rv0455c	Rv3382c	#N/A
Rv0456A	Rv3393	#N/A
Rv0457c	Rv3396c	RPKM > 5
Rv0458	Rv3398c	#N/A
Rv0459	Rv3400	RPKM > 5
Rv0460	Rv3410c	RPKM > 5
Rv0461	Rv3411c	RPKM > 5
Rv0462	Rv3423c	RPKM > 5
Rv0463	Rv3436c	RPKM > 5
Rv0464c	Rv3441c	RPKM > 5
Rv0465c	Rv3464	RPKM > 5
Rv0466	Rv3465	RPKM > 5
Rv0467	Rv3468c	#N/A
Rv0468	Rv3470c	#N/A
Rv0469	Rv3490	RPKM > 5
Rv0470c	Rv3509c	RPKM > 5
Rv0471c	Rv3529c	#N/A
Rv0472c	Rv3565	RPKM > 5
Rv0473	Rv3581c	RPKM > 5
Rv0474	Rv3582c	RPKM > 5
Rv0475	Rv3588c	RPKM > 5
Rv0476	Rv3627c	RPKM > 5
Rv0477	Rv3628	RPKM > 5
Rv0478	Rv3634c	RPKM > 5
Rv0479c	Rv3696c	RPKM > 5
Rv0480c	Rv3708c	RPKM > 5
Rv0481c	Rv3709c	RPKM > 5
Rv0482	Rv3710	RPKM > 5
Rv0483	Rv3754	RPKM > 5
Rv0484c	Rv3772	RPKM > 5
Rv0485	Rv3784	#N/A
Rv0486	Rv3790	RPKM > 5
Rv0487	Rv3791	RPKM > 5
Rv0489	Rv3792	RPKM > 5
Rv0490	Rv3794	RPKM > 5
Rv0491	Rv3795	RPKM > 5
Rv0493c	Rv3800c	RPKM > 5
Rv0495c	Rv3801c	RPKM > 5
Rv0496	Rv3806c	RPKM > 5
Rv0497	Rv3807c	RPKM > 5
Rv0498	Rv3808c	RPKM > 5
Rv0499	Rv3809c	RPKM > 5
Rv0500	Rv3815c	RPKM > 5
Rv0500A	Rv3818	RPKM > 5
Rv0500B	Rv3826	RPKM > 5
Rv0501	Rv3838c	RPKM > 5
Rv0502	Rv3913	RPKM > 5
Rv0503c
Rv0504c
Rv0505c
Rv0506
Rv0507
Rv0508
Rv0509
Rv0510
Rv0511
Rv0512
Rv0513
Rv0514
Rv0516c
Rv0517
Rv0518
Rv0519c
Rv0522
Rv0523c
Rv0524
Rv0525
Rv0526
Rv0527
Rv0528
Rv0529
Rv0530
Rv0531
Rv0532
Rv0533c
Rv0534c
Rv0535
Rv0537c
Rv0538
Rv0539
Rv0541c
Rv0542c
Rv0543c
Rv0544c
Rv0545c
Rv0546c
Rv0547c
Rv0548c
Rv0549c
Rv0551c
Rv0552
Rv0554
Rv0555
Rv0556
Rv0557
Rv0558
Rv0559c
Rv0560c
Rv0561c
Rv0562
Rv0563
Rv0564c
Rv0565c
Rv0566c
Rv0567
Rv0568
Rv0569
Rv0572c
Rv0576
Rv0577
Rv0578c
Rv0579
Rv0580c
Rv0581
Rv0582
Rv0583c
Rv0586
Rv0587
Rv0588
Rv0589
Rv0590
Rv0590A
Rv0595c
Rv0597c
Rv0598c
Rv0599c
Rv0600c
Rv0601c
Rv0604
Rv0606
Rv0608
Rv0609
Rv0609A
Rv0610c
Rv0611c
Rv0613c
Rv0615
Rv0617
Rv0618
Rv0623
Rv0624
Rv0626
Rv0627
Rv0628c
Rv0629c
Rv0632c
Rv0633c
Rv0634A
Rv0634B
Rv0634c
Rv0635
Rv0636
Rv0637
Rv0638
Rv0639
Rv0640
Rv0641
Rv0642c
Rv0643c
Rv0644c
Rv0645c
Rv0646c
Rv0647c
Rv0651
Rv0652
Rv0653c
Rv0654
Rv0655
Rv0657c
Rv0658c
Rv0659c
Rv0660c
Rv0663
Rv0664
Rv0667
Rv0668
Rv0669c
Rv0670
Rv0671
Rv0672
Rv0673
Rv0674
Rv0676c
Rv0677c
Rv0678
Rv0679c
Rv0680c
Rv0681
Rv0682
Rv0683
Rv0684
Rv0685
Rv0686
Rv0687
Rv0688
Rv0690c
Rv0691c
Rv0692
Rv0693
Rv0694
Rv0695
Rv0696
Rv0698
Rv0700
Rv0701
Rv0702
Rv0703
Rv0704
Rv0705
Rv0706
Rv0707
Rv0708
Rv0709
Rv0710
Rv0711
Rv0712
Rv0713
Rv0714
Rv0715
Rv0716
Rv0717
Rv0718
Rv0719
Rv0720
Rv0721
Rv0722
Rv0723
Rv0724
Rv0726c
Rv0730
Rv0732
Rv0733
Rv0734
Rv0735
Rv0738
Rv0740
Rv0741
Rv0744c
Rv0746
Rv0748
Rv0749
Rv0749A
Rv0751c
Rv0752c
Rv0753c
Rv0755A
Rv0755c
Rv0756c
Rv0757
Rv0758
Rv0759c
Rv0760c
Rv0761c
Rv0762c
Rv0763c
Rv0765c
Rv0767c
Rv0769
Rv0772
Rv0773c
Rv0774c
Rv0775
Rv0777
Rv0778
Rv0780
Rv0781
Rv0783c
Rv0784
Rv0785
Rv0786c
Rv0787A
Rv0788
Rv0789c
Rv0798c
Rv0799c
Rv0800
Rv0801
Rv0803
Rv0804
Rv0805
Rv0806c
Rv0808
Rv0809
Rv0810c
Rv0811c
Rv0812
Rv0813c
Rv0814c
Rv0817c
Rv0818
Rv0819
Rv0820
Rv0821c
Rv0822c
Rv0823c
Rv0824c
Rv0825c
Rv0831c
Rv0832
Rv0833
Rv0834c
Rv0835
Rv0838
Rv0839
Rv0842
Rv0844c
Rv0845
Rv0846c
Rv0847
Rv0848
Rv0849
Rv0850
Rv0853c
Rv0854
Rv0855
Rv0856
Rv0857
Rv0858c
Rv0859
Rv0860
Rv0861c
Rv0862c
Rv0863
Rv0864
Rv0865
Rv0866
Rv0867c
Rv0868c
Rv0869c
Rv0870c
Rv0871
Rv0872c
Rv0873
Rv0875c
Rv0876c
Rv0877
Rv0879c
Rv0880
Rv0882
Rv0883c
Rv0884c
Rv0885
Rv0888
Rv0889c
Rv0890c
Rv0891c
Rv0892
Rv0896
Rv0897c
Rv0898c
Rv0899
Rv0900
Rv0901
Rv0902c
Rv0903c
Rv0904c
Rv0905
Rv0906
Rv0907
Rv0908
Rv0909
Rv0910
Rv0911
Rv0912
Rv0913c
Rv0914c
Rv0917
Rv0920c
Rv0921
Rv0922
Rv0923c
Rv0924c
Rv0925c
Rv0926c
Rv0927c
Rv0928
Rv0929
Rv0930
Rv0931c
Rv0932c
Rv0933
Rv0934
Rv0935
Rv0936
Rv0937c
Rv0938
Rv0939
Rv0940c
Rv0941c
Rv0945
Rv0946c
Rv0948c
Rv0949
Rv0950c
Rv0951
Rv0952
Rv0954
Rv0955
Rv0956
Rv0957
Rv0958
Rv0959
Rv0961
Rv0965c
Rv0966c
Rv0967
Rv0968
Rv0969
Rv0970
Rv0972c
Rv0977
Rv0979A
Rv0981
Rv0982
Rv0983
Rv0984
Rv0985c
Rv0987
Rv0988
Rv0989c
Rv0990c
Rv0991c
Rv0993
Rv0994
Rv0995
Rv0996
Rv0997
Rv0999
Rv1000c
Rv1001
Rv1002c
Rv1003
Rv1004c
Rv1006
Rv1007c
Rv1008
Rv1009
Rv1010
Rv1011
Rv1013
Rv1015c
Rv1016c
Rv1017c
Rv1018c
Rv1019
Rv1020
Rv1021
Rv1022
Rv1023
Rv1024
Rv1025
Rv1027c
Rv1031
Rv1032c
Rv1033c
Rv1043c
Rv1046c
Rv1049
Rv1054
Rv1055
Rv1056
Rv1058
Rv1059
Rv1060
Rv1061
Rv1063c
Rv1065
Rv1066
Rv1069c
Rv1070c
Rv1071c
Rv1072
Rv1073
Rv1074c
Rv1076
Rv1077
Rv1078
Rv1079
Rv1080c
Rv1081c
Rv1082
Rv1083
Rv1084
Rv1085c
Rv1086
Rv1087
Rv1089A
Rv1091
Rv1092c
Rv1093
Rv1094
Rv1095
Rv1096
Rv1097c
Rv1098c
Rv1099c
Rv1100
Rv1101c
Rv1102c
Rv1103c
Rv1104
Rv1106c
Rv1107c
Rv1108c
Rv1109c
Rv1110
Rv1111c
Rv1113
Rv1114
Rv1117
Rv1118c
Rv1121
Rv1122
Rv1123c
Rv1124
Rv1125
Rv1126c
Rv1127c
Rv1129c
Rv1130
Rv1131
Rv1132
Rv1133c
Rv1138c
Rv1139c
Rv1140
Rv1141c
Rv1142c
Rv1143
Rv1144
Rv1148c
Rv1152
Rv1153c
Rv1155
Rv1156
Rv1157c
Rv1158c
Rv1159
Rv1159A
Rv1161
Rv1162
Rv1163
Rv1164
Rv1165
Rv1166
Rv1167c
Rv1168c
Rv1169c
Rv1170
Rv1171
Rv1172c
Rv1173
Rv1174c
Rv1175c
Rv1176c
Rv1177
Rv1178
Rv1179c
Rv1180
Rv1184c
Rv1185c
Rv1186c
Rv1191
Rv1192
Rv1193
Rv1194c
Rv1195
Rv1196
Rv1197
Rv1198
Rv1200
Rv1201c
Rv1202
Rv1204c
Rv1205
Rv1206
Rv1207
Rv1208
Rv1209
Rv1210
Rv1211
Rv1213
Rv1214c
Rv1215c
Rv1216c
Rv1217c
Rv1218c
Rv1220c
Rv1221
Rv1222
Rv1223
Rv1224
Rv1225c
Rv1226c
Rv1227c
Rv1229c
Rv1230c
Rv1231c
Rv1232c
Rv1233c
Rv1234
Rv1235
Rv1236
Rv1237
Rv1238
Rv1239c
Rv1240
Rv1241
Rv1242
Rv1244
Rv1245c
Rv1246c
Rv1247c
Rv1248c
Rv1249c
Rv1251c
Rv1252c
Rv1253
Rv1254
Rv1257c
Rv1260
Rv1261c
Rv1262c
Rv1263
Rv1264
Rv1265
Rv1266c
Rv1267c
Rv1268c
Rv1269c
Rv1270c
Rv1271c
Rv1272c
Rv1273c
Rv1274
Rv1275
Rv1276c
Rv1277
Rv1278
Rv1279
Rv1280c
Rv1281c
Rv1282c
Rv1283c
Rv1284
Rv1285
Rv1286
Rv1287
Rv1288
Rv1289
Rv1290c
Rv1292
Rv1293
Rv1294
Rv1295
Rv1296
Rv1297
Rv1298
Rv1299
Rv1300
Rv1301
Rv1302
Rv1303
Rv1304
Rv1305
Rv1306
Rv1307
Rv1308
Rv1309
Rv1310
Rv1311
Rv1312
Rv1314c
Rv1315
Rv1316c
Rv1317c
Rv1319c
Rv1320c
Rv1321
Rv1322
Rv1322A
Rv1323
Rv1324
Rv1325c
Rv1326c
Rv1327c
Rv1328
Rv1329c
Rv1331
Rv1332
Rv1333
Rv1334
Rv1335
Rv1336
Rv1337
Rv1338
Rv1339
Rv1340
Rv1341
Rv1342c
Rv1343c
Rv1344
Rv1345
Rv1346
Rv1347c
Rv1351
Rv1352
Rv1360
Rv1362c
Rv1363c
Rv1364c
Rv1365c
Rv1367c
Rv1368
Rv1375
Rv1376
Rv1377c
Rv1378c
Rv1379
Rv1380
Rv1381
Rv1382
Rv1383
Rv1384
Rv1385
Rv1386
Rv1387
Rv1388
Rv1389
Rv1390
Rv1391
Rv1392
Rv1393c
Rv1394c
Rv1396c
Rv1397c
Rv1398c
Rv1399c
Rv1400c
Rv1401
Rv1402
Rv1404
Rv1406
Rv1407
Rv1408
Rv1409
Rv1410c
Rv1411c
Rv1412
Rv1413
Rv1415
Rv1416
Rv1417
Rv1418
Rv1419
Rv1420
Rv1421
Rv1422
Rv1423
Rv1425
Rv1426c
Rv1427c
Rv1428c
Rv1430
Rv1431
Rv1433
Rv1434
Rv1435c
Rv1436
Rv1437
Rv1438
Rv1440
Rv1441c
Rv1442
Rv1443c
Rv1444c
Rv1445c
Rv1446c
Rv1447c
Rv1448c
Rv1449c
Rv1451
Rv1453
Rv1454c
Rv1456c
Rv1457c
Rv1458c
Rv1459c
Rv1460
Rv1461
Rv1462
Rv1463
Rv1464
Rv1465
Rv1466
Rv1467c
Rv1468c
Rv1469
Rv1470
Rv1471
Rv1472
Rv1473
Rv1473A
Rv1474c
Rv1475c
Rv1476
Rv1477
Rv1478
Rv1479
Rv1480
Rv1481
Rv1483
Rv1484
Rv1485
Rv1486c
Rv1487
Rv1488
Rv1489
Rv1489A
Rv1491c
Rv1492
Rv1493
Rv1494
Rv1495
Rv1496
Rv1497
Rv1498A
Rv1498c
Rv1500
Rv1501
Rv1502
Rv1506c
Rv1507c
Rv1508A
Rv1508c
Rv1509
Rv1510
Rv1511
Rv1512
Rv1513
Rv1514c
Rv1515c
Rv1516c
Rv1520
Rv1521
Rv1522c
Rv1523
Rv1524
Rv1525
Rv1527c
Rv1529
Rv1531
Rv1532c
Rv1533
Rv1534
Rv1535
Rv1536
Rv1538c
Rv1539
Rv1540
Rv1541c
Rv1543
Rv1544
Rv1545
Rv1546
Rv1547
Rv1549
Rv1556
Rv1558
Rv1559
Rv1560
Rv1564c
Rv1565c
Rv1566c
Rv1567c
Rv1568
Rv1569
Rv1570
Rv1571
Rv1572c
Rv1577c
Rv1578c
Rv1579c
Rv1580c
Rv1584c
Rv1586c
Rv1589
Rv1590
Rv1591
Rv1592c
Rv1593c
Rv1594
Rv1595
Rv1596
Rv1597
Rv1598c
Rv1599
Rv1600
Rv1601
Rv1602
Rv1603
Rv1604
Rv1605
Rv1606
Rv1607
Rv1608c
Rv1609
Rv1610
Rv1611
Rv1612
Rv1613
Rv1614
Rv1615
Rv1616
Rv1617
Rv1618
Rv1620c
Rv1621c
Rv1622c
Rv1623c
Rv1624c
Rv1625c
Rv1626
Rv1627c
Rv1628c
Rv1629
Rv1630
Rv1631
Rv1632c
Rv1633
Rv1634
Rv1635c
Rv1636
Rv1637c
Rv1638
Rv1638A
Rv1639c
Rv1640c
Rv1641
Rv1642
Rv1643
Rv1644
Rv1646
Rv1647
Rv1648
Rv1649
Rv1650
Rv1651c
Rv1652
Rv1653
Rv1654
Rv1655
Rv1656
Rv1657
Rv1658
Rv1659
Rv1660
Rv1661
Rv1662
Rv1663
Rv1665
Rv1666c
Rv1668c
Rv1672c
Rv1676
Rv1677
Rv1678
Rv1679
Rv1680
Rv1681
Rv1683
Rv1684
Rv1686c
Rv1687c
Rv1689
Rv1690
Rv1691
Rv1692
Rv1693
Rv1694
Rv1695
Rv1696
Rv1697
Rv1698
Rv1699
Rv1700
Rv1701
Rv1702c
Rv1703c
Rv1704c
Rv1707
Rv1708
Rv1709
Rv1710
Rv1711
Rv1712
Rv1713
Rv1722
Rv1728c
Rv1729c
Rv1730c
Rv1731
Rv1732c
Rv1741
Rv1743
Rv1746
Rv1747
Rv1749c
Rv1750c
Rv1751
Rv1752
Rv1753c
Rv1754c
Rv1761c
Rv1766
Rv1767
Rv1768
Rv1769
Rv1770
Rv1771
Rv1772
Rv1774
Rv1775
Rv1778c
Rv1779c
Rv1780
Rv1782
Rv1783
Rv1784
Rv1788
Rv1789
Rv1791
Rv1792
Rv1793
Rv1794
Rv1795
Rv1796
Rv1797
Rv1798
Rv1800
Rv1803c
Rv1806
Rv1807
Rv1808
Rv1809
Rv1810
Rv1811
Rv1812c
Rv1813c
Rv1814
Rv1815
Rv1816
Rv1818c
Rv1819c
Rv1820
Rv1821
Rv1822
Rv1823
Rv1824
Rv1825
Rv1826
Rv1827
Rv1828
Rv1829
Rv1830
Rv1831
Rv1832
Rv1833c
Rv1835c
Rv1836c
Rv1837c
Rv1838c
Rv1839c
Rv1841c
Rv1842c
Rv1843c
Rv1844c
Rv1845c
Rv1846c
Rv1847
Rv1848
Rv1849
Rv1850
Rv1851
Rv1852
Rv1853
Rv1854c
Rv1855c
Rv1856c
Rv1857
Rv1859
Rv1860
Rv1861
Rv1862
Rv1863c
Rv1864c
Rv1866
Rv1869c
Rv1870c
Rv1871c
Rv1872c
Rv1874
Rv1875
Rv1876
Rv1877
Rv1880c
Rv1881c
Rv1882c
Rv1883c
Rv1884c
Rv1885c
Rv1886c
Rv1887
Rv1888A
Rv1888c
Rv1891
Rv1892
Rv1893
Rv1894c
Rv1896c
Rv1897c
Rv1898
Rv1899c
Rv1900c
Rv1901
Rv1903
Rv1904
Rv1905c
Rv1906c
Rv1907c
Rv1908c
Rv1909c
Rv1910c
Rv1911c
Rv1912c
Rv1914c
Rv1915
Rv1916
Rv1918c
Rv1919c
Rv1920
Rv1922
Rv1923
Rv1924c
Rv1925
Rv1926c
Rv1927
Rv1932
Rv1941
Rv1942c
Rv1943c
Rv1947
Rv1950c
Rv1951c
Rv1952
Rv1953
Rv1955
Rv1956
Rv1957
Rv1959c
Rv1960c
Rv1962c
Rv1963c
Rv1978
Rv1979c
Rv1980c
Rv1981c
Rv1982c
Rv1983
Rv1984c
Rv1986
Rv1987
Rv1988
Rv1992c
Rv1993c
Rv1994c
Rv1998c
Rv2000
Rv2001
Rv2002
Rv2003c
Rv2004c
Rv2005c
Rv2007c
Rv2009
Rv2010
Rv2016
Rv2017
Rv2018
Rv2019
Rv2020c
Rv2021c
Rv2022c
Rv2024c
Rv2025c
Rv2027c
Rv2030c
Rv2031c
Rv2033c
Rv2034
Rv2035
Rv2036
Rv2037c
Rv2041c
Rv2042c
Rv2043c
Rv2045c
Rv2046
Rv2047c
Rv2048c
Rv2049c
Rv2050
Rv2051c
Rv2052c
Rv2053c
Rv2054
Rv2056c
Rv2057c
Rv2061c
Rv2062c
Rv2063
Rv2064
Rv2065
Rv2066
Rv2067c
Rv2068c
Rv2069
Rv2070c
Rv2074
Rv2075c
Rv2076c
Rv2077c
Rv2079
Rv2080
Rv2081c
Rv2082
Rv2083
Rv2084
Rv2085
Rv2088
Rv2091c
Rv2092c
Rv2093c
Rv2094c
Rv2095c
Rv2096c
Rv2097c
Rv2100
Rv2101
Rv2102
Rv2103c
Rv2104c
Rv2109c
Rv2110c
Rv2111c
Rv2112c
Rv2113
Rv2114
Rv2115c
Rv2116
Rv2117
Rv2118c
Rv2119
Rv2120c
Rv2124c
Rv2125
Rv2127
Rv2128
Rv2129c
Rv2130c
Rv2131c
Rv2132
Rv2134c
Rv2135c
Rv2136c
Rv2137c
Rv2138
Rv2139
Rv2140c
Rv2141c
Rv2144c
Rv2145c
Rv2146c
Rv2147c
Rv2148c
Rv2149c
Rv2150c
Rv2151c
Rv2152c
Rv2153c
Rv2154c
Rv2155c
Rv2156c
Rv2157c
Rv2158c
Rv2159c
Rv2160A
Rv2160c
Rv2161c
Rv2162c
Rv2163c
Rv2164c
Rv2165c
Rv2166c
Rv2169c
Rv2171
Rv2172c
Rv2173
Rv2174
Rv2175c
Rv2176
Rv2178c
Rv2181
Rv2182c
Rv2183c
Rv2184c
Rv2185c
Rv2186c
Rv2187
Rv2188c
Rv2189c
Rv2190c
Rv2192c
Rv2193
Rv2194
Rv2195
Rv2196
Rv2197c
Rv2198c
Rv2199c
Rv2200c
Rv2201
Rv2202c
Rv2203
Rv2204c
Rv2206
Rv2207
Rv2208
Rv2210c
Rv2211c
Rv2212
Rv2213
Rv2214c
Rv2215
Rv2216
Rv2217
Rv2218
Rv2219
Rv2219A
Rv2220
Rv2221c
Rv2222c
Rv2223c
Rv2224c
Rv2225
Rv2226
Rv2228c
Rv2229c
Rv2230c
Rv2231c
Rv2234
Rv2235
Rv2237
Rv2238c
Rv2239c
Rv2240c
Rv2241
Rv2242
Rv2243
Rv2244
Rv2245
Rv2246
Rv2247
Rv2248
Rv2251
Rv2252
Rv2255c
Rv2256c
Rv2257c
Rv2258c
Rv2259
Rv2260
Rv2266
Rv2267c
Rv2271
Rv2272
Rv2273
Rv2275
Rv2276
Rv2280
Rv2284
Rv2285
Rv2288
Rv2289
Rv2290
Rv2291
Rv2293c
Rv2294
Rv2295
Rv2296
Rv2297
Rv2298
Rv2299c
Rv2300c
Rv2301
Rv2302
Rv2307D
Rv2309c
Rv2311
Rv2312
Rv2313c
Rv2314c
Rv2315c
Rv2325c
Rv2326c
Rv2327
Rv2329c
Rv2330c
Rv2331
Rv2331A
Rv2332
Rv2334
Rv2335
Rv2336
Rv2337c
Rv2338c
Rv2339
Rv2340c
Rv2342
Rv2343c
Rv2344c
Rv2345
Rv2346c
Rv2347c
Rv2348c
Rv2349c
Rv2350c
Rv2351c
Rv2352c
Rv2356c
Rv2357c
Rv2358
Rv2359
Rv2360c
Rv2361c
Rv2362c
Rv2363
Rv2364c
Rv2365c
Rv2366c
Rv2367c
Rv2368c
Rv2369c
Rv2370c
Rv2371
Rv2372c
Rv2373c
Rv2374c
Rv2375
Rv2376c
Rv2377c
Rv2378c
Rv2380c
Rv2387
Rv2388c
Rv2389c
Rv2390c
Rv2391
Rv2392
Rv2393
Rv2394
Rv2395
Rv2396
Rv2397c
Rv2399c
Rv2400c
Rv2401A
Rv2402
Rv2403c
Rv2404c
Rv2405
Rv2406c
Rv2409c
Rv2410c
Rv2411c
Rv2412
Rv2414c
Rv2416c
Rv2417c
Rv2418c
Rv2419c
Rv2420c
Rv2421c
Rv2425c
Rv2426c
Rv2427c
Rv2428
Rv2429
Rv2430c
Rv2431c
Rv2432c
Rv2438c
Rv2440c
Rv2441c
Rv2442c
Rv2443
Rv2444c
Rv2445c
Rv2446c
Rv2447c
Rv2448c
Rv2449c
Rv2450c
Rv2452c
Rv2453c
Rv2454c
Rv2455c
Rv2456c
Rv2457c
Rv2459
Rv2460c
Rv2461c
Rv2462c
Rv2463
Rv2464c
Rv2465c
Rv2466c
Rv2467
Rv2468c
Rv2469c
Rv2470
Rv2471
Rv2472
Rv2473
Rv2474c
Rv2475c
Rv2476c
Rv2477c
Rv2482c
Rv2483c
Rv2484c
Rv2485c
Rv2486
Rv2493
Rv2494
Rv2495c
Rv2496c
Rv2497c
Rv2498c
Rv2499c
Rv2500c
Rv2501c
Rv2502c
Rv2503c
Rv2504c
Rv2507
Rv2508c
Rv2509
Rv2510c
Rv2511
Rv2513
Rv2518c
Rv2519
Rv2520c
Rv2521
Rv2522c
Rv2523c
Rv2524c
Rv2525c
Rv2526
Rv2527
Rv2529
Rv2530A
Rv2530c
Rv2531c
Rv2532c
Rv2533c
Rv2534c
Rv2535c
Rv2536
Rv2537c
Rv2538c
Rv2539c
Rv2540c
Rv2541
Rv2542
Rv2548
Rv2551c
Rv2552c
Rv2553c
Rv2554c
Rv2555c
Rv2556c
Rv2557
Rv2558
Rv2560
Rv2561
Rv2562
Rv2563
Rv2564
Rv2565
Rv2566
Rv2567
Rv2568c
Rv2569c
Rv2571c
Rv2572c
Rv2574
Rv2575
Rv2576c
Rv2579
Rv2580c
Rv2581c
Rv2582
Rv2583c
Rv2584c
Rv2585c
Rv2586c
Rv2587c
Rv2588c
Rv2589
Rv2590
Rv2591
Rv2592c
Rv2593c
Rv2594c
Rv2595
Rv2596
Rv2597
Rv2598
Rv2599
Rv2600
Rv2601
Rv2601A
Rv2602
Rv2603c
Rv2604c
Rv2605c
Rv2606c
Rv2607
Rv2608
Rv2609c
Rv2610c
Rv2611c
Rv2612c
Rv2613c
[truncated: 1,130 more rows]

## Sheet: Table.S5
ORF	Name	Pathway	Literature Evidence	System	Human Homolog	Microbiome Homolog	PDB
Rv0016c	pbpA	Peptidoglycan Metabolism	NA	NA	No	Yes	No-PDB
Rv0046c	ino1	Peptidoglycan Metabolism	PMID:23028335	Broth	No	No	1GR0
Rv0334	rmlA	Arabinogalactan Synthesis	PMID:12657046	Broth	No	Yes	No-PDB
Rv0470c	pcaA	Mycolic Acid Biosynthesis	PMID:10882107;PMID:14569030	Mice Model	No	Yes	No-PDB
Rv0482	murB	Sugar Metabolism	PMID:23028335	Broth	No	Yes	No-PDB
Rv0618	galTa	Nucleotide Sugar Metabolism	NA	NA	No	Yes	No-PDB
Rv0619	galTb	Nucleotide Sugar Metabolism	NA	NA	No	Yes	No-PDB
Rv0620	galK	Sugar Metabolism	NA	NA	Yes	Yes	No-PDB
Rv0644c	mmaA2	Mycolic Acid Biosynthesis	NA	NA	No	Yes	No-PDB
Rv0993	galU	Sugar Metabolism	PMID:12657046	Broth	No	Yes	No-PDB
Rv1159	pimE	PIM Biosynthesis	NA	NA	No	No	No-PDB
Rv1201c	Rv1201c	Lysine Metabolism	PMID:12657046	Broth	No	Yes	No-PDB
Rv1202	dapE	Lysine Metabolism	PMID:12657046	Broth	No	Yes	No-PDB
Rv1293	lysA	Lysine Metabolism	PMID:12657046	Broth	No	Yes	No-PDB
Rv1302	rfe	Arabinogalactan Synthesis	PMID:23028335	Broth	No	Yes	No-PDB
Rv1315	murA	Sugar Metabolism	PMID:10589726	NA	No	Yes	No-PDB
Rv1338	murI	Glutamate Metabolism	PMID:14569030	Mice model	No	Yes	No-PDB
Rv1350	fabG	Fatty Acid Metabolism	PMID:12657046	Broth	Yes	Yes	No-PDB
Rv1389	gmk	Purine Metabolism	PMID:12657046	Broth	Yes	Yes	No-PDB
Rv1392	metK	Methionine Metabolism	PMID:12657046	Broth	Yes	Yes	No-PDB
Rv1449c	tkt	Pentose Phosphate Pathway	PMID:12657046	Broth	No	Yes	No-PDB
Rv1484	inhA	Fatty Acid Metabolism	NA	NA	No	No	1BVR, 1ENY
Rv1500	Rv1500	PIM Biosynthesis	PMID:23028335	Broth	No	No	No-PDB
Rv1551	plsB1	Fatty Acid Metabolism	NA	NA	No	No	No-PDB
Rv1599	hisD	Histidine Metabolism	PMID:12657046	Broth	No	Yes	No-PDB
Rv1601	hisB	Histidine Metabolism	PMID:12657046	Broth	No	Yes	No-PDB
Rv1603	hisA	Histidine Metabolism	PMID:12657046	Broth	No	Yes	No-PDB
Rv1605	hisF	Histidine Metabolism	PMID:12657046	Broth	No	Yes	No-PDB
Rv1606	hisI	Histidine Metabolism	PMID:12657046	Broth	No	Yes	No-PDB
Rv1652	argC	Urea Cycle	PMID:12657046	Broth	No	Yes	No-PDB
Rv1654	argB	Urea Cycle	PMID:12657046	Broth	No	No	2AP9
Rv1655	argD	Urea Cycle	PMID:12657046	Broth	Yes	Yes	No-PDB
Rv1662	pks8	Membrane Metabolism	PMID:12657046	Broth	No	No	No-PDB
Rv1663	pks17	Membrane Metabolism	PMID:12657046	Broth	No	No	No-PDB
Rv1692	Rv1692	Sugar Metabolism	NA	NA	No	Yes	No-PDB
Rv2051c	ppm1	Membrane Metabolism	PMID:23028335	Broth	No	No	No-PDB
Rv2121c	hisG	Histidine Metabolism	PMID:12657046	Broth	No	Yes	No-PDB
Rv2122c	hisE	Histidine Metabolism	PMID:12657046	Broth	No	Yes	No-PDB
Rv2136c	uppP	Cofactor Metabolism, Polyprenyl Metabolism	NA	NA	No	Yes	No-PDB
Rv2152c	murC	Peptidoglycan Metabolism	PMID:12657046	Broth	No	Yes	No-PDB
Rv2153c	murG	Peptidoglycan Metabolism	PMID:12657046	Broth	No	Yes	No-PDB
Rv2155c	murD	Peptidoglycan Metabolism	PMID:12657046	Broth	No	Yes	No-PDB
Rv2156c	mraY	Peptidoglycan Metabolism	PMID:12657046	Broth	No	Yes	No-PDB
Rv2157c	murF	Peptidoglycan Metabolism	PMID:12657046	Broth	No	Yes	No-PDB
Rv2158c	murE	Peptidoglycan Metabolism	NA	NA	No	Yes	No-PDB
Rv2163c	pbpB	Peptidoglycan Metabolism	PMID:12657046	Broth	No	No	No-PDB
Rv2178c	aroG	Phenylalanine Tyrosine Tryptophan Metabolism	PMID:12657046	Broth	No	No	2B7O, 2W19, 2W1A
Rv2188c	Rv2188c	PIM Biosynthesis	PMID:12657046	Broth	No	No	No-PDB
Rv2201	asnB	Alanine and Aspartate Metabolism	PMID:12657046	Broth	No	Yes	No-PDB
Rv2210c	ilvE	Valine Leucine and Isoleucine Metabolism	PMID:12657046	Broth	Yes	Yes	No-PDB
Rv2245	kasA	Mycolic Acid Biosynthesis	PMID:12657046	Broth	Yes	Yes	No-PDB
Rv2246	kasB	Mycolic Acid Biosynthesis	PMID:23028335	Broth	No	Yes	No-PDB
Rv2378c	mbtG	Membrane Metabolism	PMID:12657046	Broth	No	No	No-PDB
Rv2379c	mbtF	Membrane Metabolism	PMID:23028335	Broth	No	No	No-PDB
Rv2380c	mbtE	Membrane Metabolism	PMID:23028335	Broth	No	No	No-PDB
Rv2381c	mbtD	Membrane Metabolism	PMID:23028335	Broth	No	No	No-PDB
Rv2382c	mbtC	Membrane Metabolism	PMID:12657046	Broth	No	Yes	No-PDB
Rv2383c	mbtB	Membrane Metabolism	PMID:10655517	Macrophage	No	No	No-PDB
Rv2384	mbtA	Membrane Metabolism	PMID:23028335	Broth	No	Yes	No-PDB
Rv2386c	mbtI	Membrane Metabolism	PMID:12657046	Broth	No	Yes	No-PDB
Rv2445c	ndk	Pyrimidine Metabolism	NA	NA	Yes	Yes	No-PDB
Rv2524c	fas	Fatty Acid Metabolism	PMID:12657046	Broth	No	Yes	No-PDB
Rv2537c	aroD	Phenylalanine Tyrosine Tryptophan Metabolism	PMID:12657046	Broth	No	Yes	No-PDB
Rv2538c	aroB	Phenylalanine Tyrosine Tryptophan Metabolism	PMID:12657046	Broth	No	Yes	No-PDB
Rv2539c	aroK	Phenylalanine Tyrosine Tryptophan Metabolism	PMID:12657046	Broth	No	Yes	No-PDB
Rv2540c	aroF	Phenylalanine Tyrosine Tryptophan Metabolism	PMID:12657046	Broth	No	Yes	No-PDB
Rv2552c	aroE	Phenylalanine Tyrosine Tryptophan Metabolism	PMID:12657046	Broth	No	No	No-PDB
Rv2610c	pimA	PIM Biosynthesis	PMID:23028335	Broth	No	No	No-PDB
Rv2611c	Rv2611c	PIM Biosynthesis	PMID:12657046	Broth	No	No	No-PDB
Rv2612c	pgsA1	Membrane Metabolism, PIM Biosynthesis	PMID:12657046	Broth	No	No	No-PDB
Rv2726c	dapF	Lysine Metabolism	PMID:12657046	Broth	No	Yes	No-PDB
Rv2753c	dapA	Lysine Metabolism	PMID:12657046	Broth	No	Yes	No-PDB
Rv2763c	dfrA	Cofactor Metabolism, Folate Metabolism	NA	NA	No	Yes	No-PDB
Rv2773c	dapB	Lysine Metabolism	PMID:23028335	Broth	No	Yes	No-PDB
Rv2881c	cdsA	Fatty Acid Metabolism, Membrane Metabolism, PIM Biosynthesis	PMID:12657046	Broth	No	No	No-PDB
Rv2911	dacB2	Peptidoglycan Metabolism	NA	NA	No	No	2BCF
Rv2928	tesA	Membrane Metabolism	PMID:23028335	Broth	No	No	No-PDB
Rv2931	ppsA	Membrane Metabolism	NA	NA	No	No	No-PDB
Rv2932	ppsB	Membrane Metabolism	NA	NA	No	No	No-PDB
Rv2933	ppsC	Membrane Metabolism	NA	NA	No	No	1PQW
Rv2934	ppsD	Membrane Metabolism	NA	NA	No	No	No-PDB
Rv2935	ppsE	Membrane Metabolism	NA	NA	No	No	No-PDB
Rv2940c	mas	Membrane Metabolism	NA	NA	No	No	No-PDB
Rv2941	fadD28	Membrane Metabolism	NA	NA	No	No	3E53
Rv2947c	pks15	Fatty Acid Metabolism	NA	NA	Yes	Yes	No-PDB
Rv2957	Rv2957	Phenolic glycolipid biosynthesis	NA	NA	No	No	No-PDB
Rv2958c	Rv2958c	Phenolic glycolipid biosynthesis	NA	NA	No	No	No-PDB
Rv2962c	Rv2962c	Phenolic glycolipid biosynthesis	NA	NA	No	No	No-PDB
Rv2981c	ddl	Arabinogalactan Synthesis	PMID:12657046;PMID:14569030	Broth;Mice model	No	Yes	No-PDB
Rv2987c	leuD	Valine Leucine and Isoleucine Metabolism	PMID:12657046	Broth	No	Yes	No-PDB
Rv2988c	leuC	Valine Leucine and Isoleucine Metabolism	PMID:23028335	Broth	No	Yes	No-PDB
Rv2995c	leuB	Valine Leucine and Isoleucine Metabolism	PMID:12657046	Broth	No	Yes	No-PDB
Rv3001c	ilvC	Valine Leucine and Isoleucine Metabolism	PMID:12657046	Broth	No	Yes	No-PDB
Rv3227	aroA	Phenylalanine Tyrosine Tryptophan Metabolism	NA	NA	No	Yes	No-PDB
Rv3248c	sahH	Methionine Metabolism	PMID:12657046	Broth	Yes	Yes	No-PDB
Rv3264c	manB	Membrane Metabolism, Sugar Metabolism	PMID:12657046	Broth	No	No	No-PDB
Rv3266c	rmlD	Arabinogalactan Synthesis	PMID:23028335	Broth	No	Yes	No-PDB
Rv3280	accD5	Fatty Acid Metabolism, Pyruvate Metabolism	PMID:23028335	Broth	Yes	Yes	No-PDB
Rv3330	dacB1	Membrane Metabolism, Peptidoglycan Metabolism	NA	NA	No	No	No-PDB
Rv3393	iunH	Purine Metabolism	NA	NA	No	No	No-PDB
Rv3436c	glmS	Glutamate Metabolism	PMID:12657046	Broth	Yes	Yes	No-PDB
Rv3465	rmlC	Arabinogalactan Synthesis	PMID:16472764	Broth	No	Yes	No-PDB
Rv3490	otsA	Membrane Metabolism	PMID:12657046;PMID:17471433	Broth;Mice model	No	No	No-PDB
Rv3627c	Rv3627c	Peptidoglycan Metabolism	PMID:12657046	Broth	No	No	No-PDB
Rv3710	leuA	Valine Leucine and Isoleucine Metabolism	PMID:12657046	Broth	No	Yes	No-PDB
Rv3754	tyrA	Phenylalanine Tyrosine Tryptophan Metabolism	PMID:23028335	Broth	No	Yes	No-PDB
Rv3792	Rv3792	Arabinogalactan Synthesis	PMID:12657046	Broth	No	No	No-PDB
Rv3794	embA	Arabinogalactan Synthesis	PMID:18174142;PMID:14569030	Broth;Mice model	No	No	No-PDB
Rv3795	embB	Arabinogalactan Synthesis	PMID:23028335	Broth	No	No	No-PDB
Rv3800c	pks13	Mycolic Acid Biosynthesis	PMID:12657046	Broth	No	No	No-PDB
Rv3801c	fadD32	Mycolic Acid Biosynthesis	PMID:12657046	Broth	No	No	No-PDB
Rv3808c	glfT	Arabinogalactan Synthesis	PMID:11395463	Broth	No	No	No-PDB
Rv3809c	glf	Arabinogalactan Synthesis	PMID:11395463	Broth	No	Yes	No-PDB
Rv3815c	Rv3815c	Fatty Acid Metabolism	NA	NA	No	No	No-PDB
Rv3818	Rv3818	Membrane Metabolism	NA	NA	No	No	No-PDB
Rv3838c	pheA	Phenylalanine Tyrosine Tryptophan Metabolism	NA	NA	No	No	No-PDB

## Sheet: Table.S6
ORF	Name	Pathway	Literature Evidence	System	Human Homolog	Microbiome Homolog	PDB
Rv0118c	oxcA	Glyoxylate Metabolism	PMID:12657046	Broth	Yes	Yes	No-PDB
Rv0155	pntAa	Pantothenate and CoA Metabolism	NA	NA	Yes	Yes	No-PDB
Rv0156	pntAb	Pantothenate and CoA Metabolism	NA	NA	Yes	Yes	No-PDB
Rv0157	pntB	Pantothenate and CoA Metabolism	NA	NA	Yes	Yes	No-PDB
Rv0408	pta	Pyruvate Metabolism	NA	NA	No	Yes	No-PDB
Rv0409	ackA	Pyruvate Metabolism	NA	NA	No	Yes	No-PDB
Rv0694	lldD1	Glycolysis, Pyruvate Metabolism	PMID:23028335	Broth	Yes	Yes	No-PDB
Rv0729	xylB	Sugar Metabolism	NA	NA	No	No	No-PDB
Rv0794c	Rv0794c	Methionine Metabolism	NA	NA	No	No	No-PDB
Rv0811c	Rv0811c	Folate Metabolism	PMID:12657046	Broth	No	No	No-PDB
Rv0824c	desA1	Fatty Acid Metabolism	PMID:12657046	Broth	No	No	No-PDB
Rv0886	fprB	Redox Metabolism	NA	NA	Yes	Yes	No-PDB
Rv1094	desA2	Fatty Acid Metabolism	PMID:12657046	Broth	No	No	1ZA0
Rv1188	Rv1188	Arginine and Proline Metabolism	PMID:12657046	Broth	No	No	No-PDB
Rv1284	Rv1284	Miscellaneous	PMID:12657046;PMID:14569030	Broth;Mice model	No	No	1YLK
Rv1295	thrC	Cofactor Metabolism, Glycine Serine and Threonine Metabolism	PMID:12657046	Broth	No	No	2D1F
Rv1296	thrB	Glycine Serine and Threonine Metabolism	PMID:12657046	Broth	No	Yes	No-PDB
Rv1451	ctaB	Purine Metabolism	PMID:23028335	Broth	No	No	No-PDB
Rv1826	gcvH	Folate Metabolism	NA	NA	Yes	Yes	No-PDB
Rv1832	gcvB	Glycine Serine and Threonine Metabolism	PMID:12657046	Broth	Yes	Yes	No-PDB
Rv1872c	lldD2	Pyruvate Metabolism	PMID:15784600	Mice model	No	Yes	No-PDB
Rv1928c	Rv1928c	Arabinogalactan Synthesis, Sugar Metabolism	NA	NA	Yes	Yes	No-PDB
Rv2193	ctaE	Purine Metabolism	PMID:12657046	Broth	No	No	No-PDB
Rv2194	qcrC	Redox Metabolism	PMID:12657046	Broth	No	No	No-PDB
Rv2195	qcrA	Redox Metabolism	PMID:12657046	Broth	No	No	No-PDB
Rv2196	qcrB	Redox Metabolism	PMID:12657046	Broth	No	No	No-PDB
Rv2200c	ctaC	Purine Metabolism	PMID:12657046	Broth	No	No	No-PDB
Rv2211c	gcvT	Cofactor Metabolism, Glycine Serine and Threonine Metabolism	PMID:12657046;PMID:14569030	Broth;Mice model	No	Yes	No-PDB
Rv2287	yjcE	Transport	NA	NA	No	No	No-PDB
Rv2321c	rocD2	Arginine and Proline Metabolism	NA	NA	Yes	Yes	No-PDB
Rv2322c	rocD1	Arginine and Proline Metabolism	NA	NA	Yes	Yes	No-PDB
Rv2332	mez	Pyruvate Metabolism	NA	NA	Yes	Yes	No-PDB
Rv2691	ceoB	Transport	http://www.sajei.co.za/index.php/SAJEI/article/viewFile/141/116	Macrophage	No	No	No-PDB
Rv2692	ceoC	Transport	PMID:14569030	Mice model	No	No	No-PDB
Rv2780	ald	Other Amino Acid Metabolism	NA	NA	No	No	2VHV, 2VHW, 2VHX, 2VHY, 2VHZ, 2VOE, 2VOJ
Rv2855	mtr	Glutamate Metabolism, Redox Metabolism	PMID:12657046	Broth	No	No	No-PDB
Rv2984	ppk	Purine Metabolism	PMID:17630969	Macrophage	No	Yes	No-PDB
Rv3043c	ctaD	Purine Metabolism	PMID:12657046	Broth	Yes	Yes	No-PDB
Rv3106	fprA	Redox Metabolism	NA	NA	Yes	Yes	No-PDB
Rv3229c	Rv3229c	Fatty Acid Metabolism	PMID:14569030	Mice model	No	No	No-PDB
Rv3236c	Rv3236c	Transport	PMID:14569030	Mice model	No	No	No-PDB
Rv3303c	lpdA	Methionine Metabolism	NA	NA	No	No	1XDI
Rv3777	Rv3777	Redox Metabolism	NA	NA	Yes	Yes	No-PDB
Rv3790	Rv3790	Arabinogalactan Synthesis	PMID:12657046	Broth	No	No	No-PDB
Rv3791	Rv3791	Arabinogalactan Synthesis	PMID:12657046	Broth	No	No	No-PDB
Rv3806c	Rv3806c	Arabinogalactan Synthesis	PMID:12657046	Broth	No	No	No-PDB
Rv3807c	Rv3807c	Arabinogalactan Synthesis	NA	NA	No	No	No-PDB
Rv3914	trxC	Pyruvate Metabolism	NA	NA	Yes	Yes	No-PDB

## Sheet: Table.S7
ORF	Name	Pathway	Literature Evidence	System	Human Homolog	Microbiome Homolog	PDB
Rv0069c	sdaA	Cysteine Metabolism, Glycine Serine and Threonine Metabolism	PMID:23028335	Broth	No	Yes	No-PDB
Rv0087	hycE	Other Amino Acid Metabolism	PMID:23028335	Broth	No	No	No-PDB
Rv0092	ctpA	Transport	PMID:23028335	Broth	No	Yes	No-PDB
Rv0103c	ctpB	Transport	NA	NA	No	Yes	No-PDB
Rv0107c	ctpI	Transport	PMID:23028335	Broth	No	No	No-PDB
Rv0118c	oxcA	Glyoxylate Metabolism	PMID:12657046	Broth	Yes	Yes	No-PDB
Rv0126	treS	Sugar Metabolism	NA	NA	No	No	No-PDB
Rv0131c	fadE1	Beta oxidation of fatty acids, Beta oxidation of odd numbered acyl chain fatty acids, Beta oxidation of unsaturated fatty acids	NA	NA	Yes	Yes	No-PDB
Rv0137c	msrA	Other Amino Acid Metabolism	NA	NA	Yes	Yes	No-PDB
Rv0147	Rv0147	Glycolysis	NA	NA	Yes	Yes	No-PDB
Rv0154c	fadE2	Beta oxidation of fatty acids, Beta oxidation of odd numbered acyl chain fatty acids, Beta oxidation of unsaturated fatty acids	NA	NA	Yes	Yes	No-PDB
Rv0155	pntAa	Pantothenate and CoA Metabolism	NA	NA	Yes	Yes	No-PDB
Rv0156	pntAb	Pantothenate and CoA Metabolism	NA	NA	Yes	Yes	No-PDB
Rv0157	pntB	Pantothenate and CoA Metabolism	NA	NA	Yes	Yes	No-PDB
Rv0162c	adhE1	Glycolysis	NA	NA	No	No	No-PDB
Rv0183	Rv0183	Fatty Acid Metabolism	NA	NA	Yes	Yes	No-PDB
Rv0191	Rv0191	Transport	NA	NA	No	No	No-PDB
Rv0215c	fadE3	Beta oxidation of fatty acids, Beta oxidation of odd numbered acyl chain fatty acids, Beta oxidation of unsaturated fatty acids, Fatty Acid Metabolism	NA	NA	Yes	Yes	No-PDB
Rv0222	echA1	Beta oxidation of fatty acids, Beta oxidation of odd numbered acyl chain fatty acids, Beta oxidation of unsaturated fatty acids	NA	NA	Yes	Yes	No-PDB
Rv0231	fadE4	Beta oxidation of fatty acids, Beta oxidation of odd numbered acyl chain fatty acids, Beta oxidation of unsaturated fatty acids	NA	NA	No	No	No-PDB
Rv0234c	gabD1	Glutamate Metabolism	PMID:23028335	Broth	Yes	Yes	No-PDB
Rv0243	fadA2	Beta oxidation of fatty acids, Beta oxidation of odd numbered acyl chain fatty acids, Beta oxidation of unsaturated fatty acids	NA	NA	Yes	Yes	No-PDB
Rv0244c	fadE5	Beta oxidation of fatty acids, Beta oxidation of odd numbered acyl chain fatty acids, Beta oxidation of unsaturated fatty acids	NA	NA	No	No	No-PDB
Rv0266c	oplA	Glutamate Metabolism	NA	NA	Yes	Yes	No-PDB
Rv0271c	fadE6	Beta oxidation of fatty acids, Beta oxidation of odd numbered acyl chain fatty acids, Beta oxidation of unsaturated fatty acids	NA	NA	No	No	No-PDB
Rv0317c	glpQ2	Fatty Acid Metabolism	NA	NA	No	No	No-PDB
Rv0321	dcd	Pyrimidine Metabolism	NA	NA	No	Yes	No-PDB
Rv0346c	ansP2	Transport	PMID:17471433	Animal Model	No	Yes	No-PDB
Rv0373c	Rv0373c	Redox Metabolism	PMID:23028335	Broth	No	No	No-PDB
Rv0374c	Rv0374c	Redox Metabolism	NA	NA	Yes	Yes	No-PDB
Rv0375c	Rv0375c	Redox Metabolism	NA	NA	No	No	No-PDB
Rv0386	Rv0386	Purine Metabolism	PMID:19516256	Macrophage	No	No	No-PDB
Rv0392c	ndhA	Propanoate Metabolism	NA	NA	No	No	No-PDB
Rv0400c	fadE7	Beta oxidation of fatty acids, Beta oxidation of odd numbered acyl chain fatty acids, Beta oxidation of unsaturated fatty acids	PMID:12657046	Broth	Yes	Yes	No-PDB
Rv0408	pta	Pyruvate Metabolism	NA	NA	No	Yes	No-PDB
Rv0409	ackA	Pyruvate Metabolism	NA	NA	No	Yes	No-PDB
Rv0432	sodC	Cofactor Metabolism	PMID:11447176	Macrophage	No	No	1PZS
Rv0456c	echA2	Beta oxidation of fatty acids, Beta oxidation of odd numbered acyl chain fatty acids, Beta oxidation of unsaturated fatty acids	NA	NA	No	No	No-PDB
Rv0458	Rv0458	Glycolysis	NA	NA	Yes	Yes	No-PDB
Rv0462	lpd	Citric Acid Cycle, Glycolysis	PMID:12657046	Broth	Yes	Yes	No-PDB
Rv0468	fadB2	Beta oxidation of fatty acids, Beta oxidation of odd numbered acyl chain fatty acids, Beta oxidation of unsaturated fatty acids, Fatty Acid Metabolism	NA	NA	Yes	Yes	No-PDB
Rv0496	Rv0496	Purine Metabolism	NA	NA	No	No	No-PDB
Rv0499	Rv0499	Fatty Acid Metabolism	NA	NA	No	No	No-PDB
Rv0511	hemD	Methionine Metabolism, Porphyrin Metabolism	PMID:12657046	Broth	No	No	No-PDB
Rv0522	gabP	Transport	NA	NA	No	Yes	No-PDB
Rv0577	TB27.3	Pyruvate Metabolism	NA	NA	No	No	No-PDB
Rv0632c	echA3	Beta oxidation of fatty acids, Beta oxidation of odd numbered acyl chain fatty acids, Beta oxidation of unsaturated fatty acids	PMID:23028335	Broth	No	No	No-PDB
Rv0650	Rv0650	Glycolysis	NA	NA	No	Yes	No-PDB
Rv0672	fadE8	Beta oxidation of fatty acids, Beta oxidation of odd numbered acyl chain fatty acids, Beta oxidation of unsaturated fatty acids	NA	NA	No	Yes	No-PDB
Rv0673	echA4	Beta oxidation of fatty acids, Beta oxidation of odd numbered acyl chain fatty acids, Beta oxidation of unsaturated fatty acids	NA	NA	No	No	No-PDB
Rv0675	echA5	Beta oxidation of fatty acids, Beta oxidation of odd numbered acyl chain fatty acids, Beta oxidation of unsaturated fatty acids	PMID:12657046	Broth	No	No	No-PDB
Rv0684	fusA1	Miscellaneous	PMID:12657046	Broth	Yes	Yes	No-PDB
Rv0694	lldD1	Glycolysis, Pyruvate Metabolism	PMID:23028335	Broth	Yes	Yes	No-PDB
Rv0729	xylB	Sugar Metabolism	NA	NA	No	No	No-PDB
Rv0752c	fadE9	Beta oxidation of fatty acids, Beta oxidation of odd numbered acyl chain fatty acids, Beta oxidation of unsaturated fatty acids, Fatty Acid Metabolism	NA	NA	Yes	Yes	No-PDB
Rv0753c	mmsA	Sugar Metabolism	NA	NA	Yes	Yes	No-PDB
Rv0768	aldA	Glycolysis	NA	NA	Yes	Yes	No-PDB
Rv0773c	ggtA	Other Amino Acid Metabolism	NA	NA	No	No	No-PDB
Rv0794c	Rv0794c	Methionine Metabolism	NA	NA	No	No	No-PDB
Rv0805	Rv0805	Purine Metabolism	NA	NA	No	No	2HY1, 2HYO, 2HYP, 3IB7, 3IB8
Rv0811c	Rv0811c	Folate Metabolism	PMID:12657046	Broth	No	No	No-PDB
Rv0820	phoT	Transport	NA	NA	No	Yes	No-PDB
Rv0824c	desA1	Fatty Acid Metabolism	PMID:12657046	Broth	No	No	No-PDB
Rv0843	Rv0843	Citric Acid Cycle, Glycolysis	NA	NA	No	No	No-PDB
Rv0848	cysK2	Cysteine Metabolism	NA	NA	No	No	No-PDB
Rv0853c	pdc	Pyruvate Metabolism	PMID:15784600	Mice model	No	No	No-PDB
Rv0859	fadA	Beta oxidation of fatty acids, Beta oxidation of odd numbered acyl chain fatty acids, Beta oxidation of unsaturated fatty acids, Fatty Acid Metabolism	NA	NA	Yes	Yes	No-PDB
Rv0860	fadB	Fatty Acid Metabolism	NA	NA	No	No	No-PDB
Rv0873	fadE10	Beta oxidation of fatty acids, Beta oxidation of odd numbered acyl chain fatty acids, Beta oxidation of unsaturated fatty acids, Fatty Acid Metabolism	NA	NA	No	No	No-PDB
Rv0886	fprB	Redox Metabolism	NA	NA	Yes	Yes	No-PDB
Rv0889c	citA	Citric Acid Cycle	NA	NA	No	No	No-PDB
Rv0896	gltA	Citric Acid Cycle	NA	NA	No	Yes	No-PDB
Rv0905	echA6	Beta oxidation of fatty acids, Beta oxidation of odd numbered acyl chain fatty acids, Beta oxidation of unsaturated fatty acids	NA	NA	No	No	3HE2
Rv0911	Rv0911	Pyruvate Metabolism	NA	NA	No	No	No-PDB
Rv0936	pstA2	Transport	NA	NA	No	No	No-PDB
Rv0971c	echA7	Beta oxidation of fatty acids, Beta oxidation of odd numbered acyl chain fatty acids, Beta oxidation of unsaturated fatty acids	NA	NA	No	No	No-PDB
Rv0972c	fadE12	Beta oxidation of fatty acids, Beta oxidation of odd numbered acyl chain fatty acids, Beta oxidation of unsaturated fatty acids	PMID:23028335	Broth	No	No	No-PDB
Rv0973c	accA2	Sugar Metabolism	PMID:12657046	Broth	Yes	Yes	No-PDB
Rv0974c	accD2	Sugar Metabolism	PMID:23028335	Broth	Yes	Yes	No-PDB
Rv0975c	fadE13	Beta oxidation of fatty acids, Beta oxidation of odd numbered acyl chain fatty acids, Beta oxidation of unsaturated fatty acids	NA	NA	Yes	Yes	No-PDB
Rv0992c	Rv0992c	Cofactor Metabolism	NA	NA	No	No	No-PDB
Rv1026	Rv1026	Purine Metabolism	PMID:12657046	Broth	No	No	No-PDB
Rv1029	kdpA	Transport	NA	NA	No	Yes	No-PDB
Rv1030	kdpB	Transport	NA	NA	No	Yes	No-PDB
Rv1031	kdpC	Transport	NA	NA	No	Yes	No-PDB
Rv1070c	echA8	Beta oxidation of fatty acids, Beta oxidation of odd numbered acyl chain fatty acids, Beta oxidation of unsaturated fatty acids	NA	NA	Yes	Yes	No-PDB
Rv1071c	echA9	Beta oxidation of fatty acids, Beta oxidation of odd numbered acyl chain fatty acids, Beta oxidation of unsaturated fatty acids	NA	NA	Yes	Yes	No-PDB
Rv1074c	fadA3	Beta oxidation of fatty acids, Beta oxidation of odd numbered acyl chain fatty acids, Beta oxidation of unsaturated fatty acids	NA	NA	Yes	Yes	No-PDB
Rv1077	cbs	Methionine Metabolism	NA	NA	Yes	Yes	No-PDB
Rv1092c	coaA	Cofactor Metabolism, Pantothenate and CoA Metabolism	PMID:12657046;PMID:14569030	Broth;Mice model	No	Yes	No-PDB
Rv1094	desA2	Fatty Acid Metabolism	PMID:12657046	Broth	No	No	1ZA0
Rv1099c	glpX	Glycolysis	PMID:14569030	Mice model	No	Yes	No-PDB
Rv1120c	Rv1120c	Purine Metabolism	NA	NA	No	No	No-PDB
Rv1121	zwf1	Pentose Phosphate Pathway	PMID:23028335	Broth	No	Yes	No-PDB
Rv1122	gnd2	Pentose Phosphate Pathway	PMID:12657046	Broth	No	Yes	No-PDB
Rv1127c	ppdK	Pyruvate Metabolism	NA	NA	No	Yes	No-PDB
Rv1130	Rv1130	Propanoate Metabolism	NA	NA	No	No	No-PDB
Rv1131	gltA1	Citric Acid Cycle, Propanoate Metabolism	PMID:23028335	Broth	No	Yes	No-PDB
Rv1141c	echA11	Beta oxidation of fatty acids, Beta oxidation of odd numbered acyl chain fatty acids, Beta oxidation of unsaturated fatty acids	NA	NA	No	Yes	No-PDB
Rv1142c	echA10	Beta oxidation of fatty acids, Beta oxidation of odd numbered acyl chain fatty acids, Beta oxidation of unsaturated fatty acids	NA	NA	No	No	No-PDB
Rv1144	Rv1144	Fatty Acid Metabolism	PMID:14569030	Mice model	Yes	Yes	No-PDB
Rv1160	mutT2	Nucleotide Sugar Metabolism, Pyrimidine Metabolism	NA	NA	No	Yes	No-PDB
Rv1187	rocA	Glutamate Metabolism	PMID:12657046	Broth	Yes	Yes	No-PDB
Rv1188	Rv1188	Arginine and Proline Metabolism	PMID:12657046	Broth	No	No	No-PDB
Rv1200	Rv1200	Transport	PMID:20394526	Mice model	No	Yes	No-PDB
Rv1213	glgC	Sugar Metabolism	NA	NA	No	Yes	No-PDB
Rv1248c	kgd	Citric Acid Cycle, Glutamate Metabolism	PMID:12657046	Broth	No	No	No-PDB
Rv1264	Rv1264	Purine Metabolism	PMID:20394526	Mice model	No	No	1Y10, 1Y11, 2EV1, 2EV2, 2EV3, 2EV4
Rv1284	Rv1284	Miscellaneous	PMID:12657046;PMID:14569030	Broth;Mice model	No	No	1YLK
Rv1295	thrC	Cofactor Metabolism, Glycine Serine and Threonine Metabolism	PMID:12657046	Broth	No	No	2D1F
Rv1296	thrB	Glycine Serine and Threonine Metabolism	PMID:12657046	Broth	No	Yes	No-PDB
Rv1318c	Rv1318c	Purine Metabolism	NA	NA	No	No	No-PDB
Rv1319c	Rv1319c	Purine Metabolism	NA	NA	No	No	No-PDB
Rv1320c	Rv1320c	Purine Metabolism	NA	NA	No	No	No-PDB
Rv1326c	glgB	Sugar Metabolism	PMID:12657046	Broth	No	Yes	No-PDB
Rv1328	glgP	Sugar Metabolism	PMID:23028335	Broth	No	Yes	No-PDB
Rv1336	cysM	Cysteine Metabolism	NA	NA	No	Yes	No-PDB
Rv1346	fadE14	Beta oxidation of fatty acids, Beta oxidation of odd numbered acyl chain fatty acids, Beta oxidation of unsaturated fatty acids	NA	NA	No	No	No-PDB
Rv1347c	Rv1347c	Fatty Acid Metabolism	PMID:12657046	Broth	No	No	1YK3
Rv1391	dfp	Cofactor Metabolism, Pantothenate and CoA Metabolism	PMID:12657046	Broth	No	Yes	No-PDB
Rv1445c	devB	Pentose Phosphate Pathway	NA	NA	No	Yes	No-PDB
Rv1447c	zwf2	Pentose Phosphate Pathway	NA	NA	Yes	Yes	No-PDB
Rv1451	ctaB	Purine Metabolism	PMID:23028335	Broth	No	No	No-PDB
Rv1467c	fadE15	Beta oxidation of fatty acids, Beta oxidation of odd numbered acyl chain fatty acids, Beta oxidation of unsaturated fatty acids	NA	NA	No	No	No-PDB
Rv1472	echA12	Beta oxidation of fatty acids, Beta oxidation of odd numbered acyl chain fatty acids, Beta oxidation of unsaturated fatty acids	NA	NA	No	No	No-PDB
Rv1538c	ansA	Alanine and Aspartate Metabolism	NA	NA	No	No	No-PDB
Rv1595	nadB	Alanine and Aspartate Metabolism	PMID:12657046	Broth	No	Yes	No-PDB
Rv1607	chaA	Transport	NA	NA	No	Yes	No-PDB
Rv1625c	cya	Purine Metabolism	PMID:16045612	Mice Model	No	No	1YK9
Rv1631	coaE	Pantothenate and CoA Metabolism	PMID:12657046	Broth	No	No	No-PDB
Rv1647	Rv1647	Purine Metabolism	NA	NA	No	No	No-PDB
Rv1658	argG	Alanine and Aspartate Metabolism	PMID:12657046	Broth	Yes	Yes	No-PDB
Rv1659	argH	Alanine and Aspartate Metabolism	PMID:12657046	Broth	Yes	Yes	No-PDB
Rv1679	fadE16	Beta oxidation of fatty acids, Beta oxidation of odd numbered acyl chain fatty acids, Beta oxidation of unsaturated fatty acids	NA	NA	No	No	No-PDB
Rv1704c	cycA	Transport	PMID:20394526	Mice model	No	Yes	No-PDB
Rv1715	fadB3	Beta oxidation of fatty acids, Beta oxidation of odd numbered acyl chain fatty acids, Beta oxidation of unsaturated fatty acids	PMID:12657046	Broth	No	Yes	No-PDB
Rv1731	gabD2	Glutamate Metabolism	NA	NA	No	No	No-PDB
Rv1755c	plcD	Fatty Acid Metabolism	NA	NA	No	No	No-PDB
Rv1812c	Rv1812c	Propanoate Metabolism	NA	NA	No	No	No-PDB
Rv1826	gcvH	Folate Metabolism	NA	NA	Yes	Yes	No-PDB
Rv1832	gcvB	Glycine Serine and Threonine Metabolism	PMID:12657046	Broth	Yes	Yes	No-PDB
Rv1844c	gnd1	Pentose Phosphate Pathway	NA	NA	Yes	Yes	No-PDB
Rv1854c	ndh	Propanoate Metabolism	NA	NA	No	No	No-PDB
Rv1872c	lldD2	Pyruvate Metabolism	PMID:15784600	Mice model	No	Yes	No-PDB
Rv1900c	lipJ	Purine Metabolism	NA	NA	No	No	1YBT, 1YBU
Rv1902c	nanT	Transport	NA	NA	No	No	No-PDB
Rv1905c	aao	Other Amino Acid Metabolism	NA	NA	No	No	No-PDB
Rv1908c	katG	Cofactor Metabolism, Redox Metabolism	PMID:23028335	Broth	No	Yes	No-PDB
Rv1912c	fadB5	Beta oxidation of fatty acids, Beta oxidation of odd numbered acyl chain fatty acids, Beta oxidation of unsaturated fatty acids	NA	NA	Yes	Yes	No-PDB
Rv1928c	Rv1928c	Arabinogalactan Synthesis, Sugar Metabolism	NA	NA	Yes	Yes	No-PDB
Rv1933c	fadE18	Beta oxidation of fatty acids, Beta oxidation of odd numbered acyl chain fatty acids, Beta oxidation of unsaturated fatty acids	NA	NA	No	No	No-PDB
Rv1934c	fadE17	Beta oxidation of fatty acids, Beta oxidation of odd numbered acyl chain fatty acids, Beta oxidation of unsaturated fatty acids	NA	NA	No	No	No-PDB
Rv1935c	echA13	Beta oxidation of fatty acids, Beta oxidation of odd numbered acyl chain fatty acids, Beta oxidation of unsaturated fatty acids	NA	NA	No	No	No-PDB
Rv2127	ansP1	Transport	NA	NA	No	Yes	No-PDB
Rv2193	ctaE	Purine Metabolism	PMID:12657046	Broth	No	No	No-PDB
Rv2194	qcrC	Redox Metabolism	PMID:12657046	Broth	No	No	No-PDB
Rv2195	qcrA	Redox Metabolism	PMID:12657046	Broth	No	No	No-PDB
Rv2196	qcrB	Redox Metabolism	PMID:12657046	Broth	No	No	No-PDB
Rv2200c	ctaC	Purine Metabolism	PMID:12657046	Broth	No	No	No-PDB
Rv2211c	gcvT	Cofactor Metabolism, Glycine Serine and Threonine Metabolism	PMID:12657046;PMID:14569030	Broth;Mice model	No	Yes	No-PDB
Rv2212	Rv2212	Purine Metabolism	NA	NA	No	No	No-PDB
Rv2215	dlaT	Citric Acid Cycle, Glycolysis	PMID:16368957	Macrophage	No	Yes	No-PDB
Rv2225	panB	Pantothenate and CoA Metabolism	PMID:12657046	Broth	No	Yes	No-PDB
Rv2241	aceE	Glycolysis	PMID:14569030	Mice model	No	Yes	No-PDB
Rv2247	accD6	Sugar Metabolism	PMID:12657046	Broth	Yes	Yes	No-PDB
Rv2252	Rv2252	Fatty Acid Metabolism	PMID:23028335	Broth	No	No	No-PDB
Rv2277c	Rv2277c	Fatty Acid Metabolism	PMID:14569030	Mice model	No	No	No-PDB
Rv2287	yjcE	Transport	NA	NA	No	No	No-PDB
Rv2289	cdh	Membrane Metabolism	NA	NA	No	No	No-PDB
Rv2298	Rv2298	Pyruvate Metabolism	NA	NA	No	No	No-PDB
Rv2320c	rocE	Transport	NA	NA	No	Yes	No-PDB
Rv2321c	rocD2	Arginine and Proline Metabolism	NA	NA	Yes	Yes	No-PDB
Rv2322c	rocD1	Arginine and Proline Metabolism	NA	NA	Yes	Yes	No-PDB
Rv2332	mez	Pyruvate Metabolism	NA	NA	Yes	Yes	No-PDB
Rv2334	cysK1	Cysteine Metabolism	NA	NA	Yes	Yes	No-PDB
Rv2335	cysE	Cysteine Metabolism	PMID:14569030	Mice model	No	No	No-PDB
Rv2344c	dgt	Purine Metabolism	NA	NA	No	Yes	No-PDB
Rv2394	ggtB	Other Amino Acid Metabolism	NA	NA	No	No	No-PDB
Rv2435c	Rv2435c	Purine Metabolism	PMID:23028335	Broth	No	No	No-PDB
Rv2436	rbsK	Pentose Phosphate Pathway	NA	NA	No	Yes	No-PDB
Rv2458	mmuM	Methionine Metabolism	NA	NA	No	Yes	No-PDB
Rv2467	pepN	Other Amino Acid Metabolism	NA	NA	No	Yes	No-PDB
Rv2471	aglA	Sugar Metabolism	NA	NA	No	Yes	No-PDB
Rv2486	echA14	Beta oxidation of fatty acids, Beta oxidation of odd numbered acyl chain fatty acids, Beta oxidation of unsaturated fatty acids	NA	NA	No	Yes	No-PDB
Rv2495c	pdhC	Glycolysis	PMID:23028335	Broth	No	No	No-PDB
Rv2496c	pdhB	Glycolysis	NA	NA	Yes	Yes	No-PDB
Rv2497c	pdhA	Glycolysis	NA	NA	Yes	Yes	No-PDB
Rv2500c	fadE19	Beta oxidation of fatty acids, Beta oxidation of odd numbered acyl chain fatty acids, Beta oxidation of unsaturated fatty acids	PMID:12657046	Broth	Yes	Yes	No-PDB
Rv2501c	accA1	Sugar Metabolism	NA	NA	Yes	Yes	No-PDB
Rv2502c	accD1	Sugar Metabolism	PMID:14569030	Mice model	Yes	Yes	No-PDB
Rv2531c	Rv2531c	Glutamate Metabolism, Phenylalanine Tyrosine Tryptophan Metabolism	NA	NA	No	No	No-PDB
Rv2573	Rv2573	Pantothenate and CoA Metabolism	NA	NA	No	No	No-PDB
Rv2583c	relA	Purine Metabolism	PMID:15784600	Mice model	No	Yes	No-PDB
Rv2589	gabT	Glutamate Metabolism	NA	NA	No	Yes	No-PDB
Rv2605c	tesB2	Redox Metabolism	NA	NA	Yes	Yes	No-PDB
Rv2674	Rv2674	Other Amino Acid Metabolism	NA	NA	Yes	Yes	No-PDB
Rv2679	echA15	Beta oxidation of fatty acids, Beta oxidation of odd numbered acyl chain fatty acids, Beta oxidation of unsaturated fatty acids	NA	NA	No	No	No-PDB
Rv2691	ceoB	Transport	http://www.sajei.co.za/index.php/SAJEI/article/viewFile/141/116	Macrophage	No	No	No-PDB
Rv2692	ceoC	Transport	PMID:14569030	Mice model	No	No	No-PDB
Rv2697c	dut	Citric Acid Cycle, Pyrimidine Metabolism	PMID:12657046	Broth	Yes	Yes	No-PDB
Rv2724c	fadE20	Beta oxidation of fatty acids, Beta oxidation of odd numbered acyl chain fatty acids, Beta oxidation of unsaturated fatty acids	NA	NA	Yes	Yes	No-PDB
Rv2747	Rv2747	Urea Cycle	PMID:12657046	Broth	No	No	No-PDB
Rv2780	ald	Other Amino Acid Metabolism	NA	NA	No	No	2VHV, 2VHW, 2VHX, 2VHY, 2VHZ, 2VOE, 2VOJ
Rv2786c	ribF	Riboflavin Metabolism	PMID:12657046	Broth	No	Yes	No-PDB
Rv2789c	fadE21	Beta oxidation of fatty acids, Beta oxidation of odd numbered acyl chain fatty acids, Beta oxidation of unsaturated fatty acids, Fatty Acid Metabolism	NA	NA	No	No	No-PDB
Rv2831	echA16	Beta oxidation of fatty acids, Beta oxidation of odd numbered acyl chain fatty acids, Beta oxidation of unsaturated fatty acids	NA	NA	No	Yes	No-PDB
Rv2855	mtr	Glutamate Metabolism, Redox Metabolism	PMID:12657046	Broth	No	No	No-PDB
Rv2858c	aldC	Phenylalanine Tyrosine Tryptophan Metabolism	NA	NA	Yes	Yes	No-PDB
Rv2899c	fdhD	Other Amino Acid Metabolism	NA	NA	No	No	No-PDB
Rv2900c	fdhF	Other Amino Acid Metabolism	NA	NA	No	Yes	No-PDB
Rv2922A	acyP	Pyruvate Metabolism	NA	NA	No	Yes	No-PDB
Rv2945c	lppX	Transport	PMID:14569030	Mice model	No	No	2BYO
Rv2964	purU	Folate Metabolism	NA	NA	No	Yes	No-PDB
Rv2965c	coaD	Pantothenate and CoA Metabolism	NA	NA	No	Yes	No-PDB
Rv2967c	pca	Citric Acid Cycle	PMID:12657046	Broth	Yes	Yes	No-PDB
Rv2984	ppk	Purine Metabolism	PMID:17630969	Macrophage	No	Yes	No-PDB
Rv3039c	echA17	Beta oxidation of fatty acids, Beta oxidation of odd numbered acyl chain fatty acids, Beta oxidation of unsaturated fatty acids	NA	NA	No	No	No-PDB
Rv3043c	ctaD	Purine Metabolism	PMID:12657046	Broth	Yes	Yes	No-PDB
Rv3061c	fadE22	Beta oxidation of fatty acids, Beta oxidation of odd numbered acyl chain fatty acids, Beta oxidation of unsaturated fatty acids	PMID:14569030	Mice model	No	No	No-PDB
Rv3106	fprA	Redox Metabolism	NA	NA	Yes	Yes	No-PDB
Rv3139	fadE24	Beta oxidation of fatty acids, Beta oxidation of odd numbered acyl chain fatty acids, Beta oxidation of unsaturated fatty acids	PMID:12657046	Broth	No	No	No-PDB
Rv3140	fadE23	Beta oxidation of fatty acids, Beta oxidation of odd numbered acyl chain fatty acids, Beta oxidation of unsaturated fatty acids	PMID:12657046	Broth	No	No	No-PDB
Rv3141	fadB4	Beta oxidation of fatty acids, Beta oxidation of odd numbered acyl chain fatty acids, Beta oxidation of unsaturated fatty acids	NA	NA	No	No	No-PDB
Rv3229c	Rv3229c	Fatty Acid Metabolism	PMID:14569030	Mice model	No	No	No-PDB
Rv3236c	Rv3236c	Transport	PMID:14569030	Mice model	No	No	No-PDB
Rv3247c	tmk	Pyrimidine Metabolism	PMID:23028335	Broth	No	No	1G3U, 1GSI, 1GTV, 1MRN, 1MRS, 1N5I, 1N5J, 1N5K, 1N5L, 1W2G, 1W2H
Rv3274c	fadE25	Beta oxidation of fatty acids, Beta oxidation of odd numbered acyl chain fatty acids, Beta oxidation of unsaturated fatty acids, Fatty Acid Metabolism	NA	NA	Yes	Yes	No-PDB
Rv3285	accA3	Sugar Metabolism	PMID:12657046	Broth	Yes	Yes	No-PDB
Rv3290c	lat	Glutamate Metabolism	NA	NA	No	No	2CIN, 2CJD, 2CJG, 2CJH, 2JJE, 2JJF, 2JJG, 2JJH
Rv3293	pcd	Glycolysis	NA	NA	Yes	Yes	No-PDB
Rv3303c	lpdA	Methionine Metabolism	NA	NA	No	No	1XDI
Rv3310	Rv3310	Riboflavin Metabolism	NA	NA	No	No	No-PDB
Rv3313c	add	Purine Metabolism	NA	NA	No	No	No-PDB
Rv3315c	cdd	Pyrimidine Metabolism	NA	NA	Yes	Yes	No-PDB
Rv3332	nagA	Sugar Metabolism	PMID:12657046	Broth	No	Yes	No-PDB
Rv3341	metX	Methionine Metabolism	PMID:12657046	Broth	No	No	No-PDB
Rv3373	echA18	Beta oxidation of fatty acids, Beta oxidation of odd numbered acyl chain fatty acids, Beta oxidation of unsaturated fatty acids	NA	NA	Yes	Yes	No-PDB
Rv3374	echA18.1	Beta oxidation of fatty acids, Beta oxidation of odd numbered acyl chain fatty acids, Beta oxidation of unsaturated fatty acids	NA	NA	No	No	No-PDB
Rv3377c	Rv3377c	Purine Metabolism	PMID:23028335	Broth	No	No	No-PDB
Rv3401	Rv3401	Sugar Metabolism	NA	NA	No	No	No-PDB
Rv3432c	gadB	Glutamate Metabolism	NA	NA	No	Yes	No-PDB
Rv3504	fadE26	Beta oxidation of fatty acids, Beta oxidation of odd numbered acyl chain fatty acids, Beta oxidation of unsaturated fatty acids	NA	NA	No	No	No-PDB
Rv3505	fadE27	Beta oxidation of fatty acids, Beta oxidation of odd numbered acyl chain fatty acids, Beta oxidation of unsaturated fatty acids	NA	NA	No	No	No-PDB
Rv3516	echA19	Beta oxidation of fatty acids, Beta oxidation of odd numbered acyl chain fatty acids, Beta oxidation of unsaturated fatty acids	NA	NA	No	Yes	No-PDB
Rv3535c	Rv3535c	Pyruvate Metabolism	NA	NA	No	Yes	No-PDB
Rv3543c	fadE29	Beta oxidation of fatty acids, Beta oxidation of odd numbered acyl chain fatty acids, Beta oxidation of unsaturated fatty acids	NA	NA	No	No	No-PDB
Rv3544c	fadE28	Beta oxidation of fatty acids, Beta oxidation of odd numbered acyl chain fatty acids, Beta oxidation of unsaturated fatty acids	PMID:17471433;PMID:14569030	Animal Model	No	No	No-PDB
Rv3546	fadA5	Beta oxidation of fatty acids, Beta oxidation of odd numbered acyl chain fatty acids, Beta oxidation of unsaturated fatty acids	NA	NA	Yes	Yes	No-PDB
Rv3550	echA20	Beta oxidation of fatty acids, Beta oxidation of odd numbered acyl chain fatty acids, Beta oxidation of unsaturated fatty acids	NA	NA	No	No	No-PDB
Rv3556c	fadA6	Beta oxidation of fatty acids, Beta oxidation of odd numbered acyl chain fatty acids, Beta oxidation of unsaturated fatty acids	PMID:14569030	Mice model	Yes	Yes	No-PDB
Rv3560c	fadE30	Beta oxidation of fatty acids, Beta oxidation of odd numbered acyl chain fatty acids, Beta oxidation of unsaturated fatty acids	PMID:14569030	Mice model	No	No	No-PDB
Rv3562	fadE31	Beta oxidation of fatty acids, Beta oxidation of odd numbered acyl chain fatty acids, Beta oxidation of unsaturated fatty acids	NA	NA	No	No	No-PDB
Rv3563	fadE32	Beta oxidation of fatty acids, Beta oxidation of odd numbered acyl chain fatty acids, Beta oxidation of unsaturated fatty acids, Fatty Acid Metabolism	PMID:14569030	Mice model	No	No	No-PDB
Rv3564	fadE33	Beta oxidation of fatty acids, Beta oxidation of odd numbered acyl chain fatty acids, Beta oxidation of unsaturated fatty acids, Fatty Acid Metabolism	PMID:12657046	Broth	No	No	No-PDB
Rv3573c	fadE34	Beta oxidation of fatty acids, Beta oxidation of odd numbered acyl chain fatty acids, Beta oxidation of unsaturated fatty acids	NA	NA	No	No	No-PDB
Rv3600c	Rv3600c	Pantothenate and CoA Metabolism	NA	NA	No	No	No-PDB
Rv3601c	panD	Alanine and Aspartate Metabolism	PMID:15784600	Mice model	No	Yes	No-PDB
Rv3602c	panC	Pantothenate and CoA Metabolism	PMID:12219086	Mice Model	No	Yes	No-PDB
Rv3624c	hpt	Purine Metabolism	PMID:23028335	Broth	No	Yes	No-PDB
Rv3645	Rv3645	Purine Metabolism	NA	NA	No	No	No-PDB
Rv3667	acs	Glycolysis, Sugar Metabolism	NA	NA	Yes	Yes	No-PDB
Rv3684	Rv3684	Cysteine Metabolism	NA	NA	No	No	No-PDB
Rv3704c	gshA	Glutamate Metabolism	NA	NA	No	No	No-PDB
Rv3737	Rv3737	Transport	NA	NA	No	No	No-PDB
Rv3756c	proZ	Transport	NA	NA	No	Yes	No-PDB
Rv3757c	proW	Transport	NA	NA	No	No	No-PDB
Rv3758c	proV	Transport	PMID:14569030	Mice model	No	Yes	No-PDB
Rv3759c	proX	Transport	NA	NA	No	No	No-PDB
Rv3761c	fadE36	Beta oxidation of fatty acids, Beta oxidation of odd numbered acyl chain fatty acids, Beta oxidation of unsaturated fatty acids	NA	NA	Yes	Yes	No-PDB
Rv3774	echA21	Beta oxidation of fatty acids, Beta oxidation of odd numbered acyl chain fatty acids, Beta oxidation of unsaturated fatty acids	NA	NA	Yes	Yes	No-PDB
Rv3777	Rv3777	Redox Metabolism	NA	NA	Yes	Yes	No-PDB
Rv3790	Rv3790	Arabinogalactan Synthesis	PMID:12657046	Broth	No	No	No-PDB
Rv3791	Rv3791	Arabinogalactan Synthesis	PMID:12657046	Broth	No	No	No-PDB
Rv3797	fadE35	Beta oxidation of fatty acids, Beta oxidation of odd numbered acyl chain fatty acids, Beta oxidation of unsaturated fatty acids	NA	NA	No	No	No-PDB
Rv3806c	Rv3806c	Arabinogalactan Synthesis	PMID:12657046	Broth	No	No	No-PDB
Rv3807c	Rv3807c	Arabinogalactan Synthesis	NA	NA	No	No	No-PDB
Rv3842c	glpQ1	Fatty Acid Metabolism	NA	NA	No	No	No-PDB
Rv3846	sodA	Cofactor Metabolism	PMID:23028335	Broth	Yes	Yes	No-PDB
Rv3858c	gltD	Glutamate Metabolism	PMID:12657046	Broth	No	Yes	No-PDB
Rv3859c	gltB	Glutamate Metabolism	PMID:12657046	Broth	No	Yes	No-PDB
Rv3914	trxC	Pyruvate Metabolism	NA	NA	Yes	Yes	No-PDB

[truncated: 13 more sheets: Table.S8, Table.S9(A), Table.S9(B), Table.S9(C), Table.S9(D), Table.S9(E), Table.S9(F), Table.S9(G), Table.S9(H), Table.S9(I), Table.S10, Table.S11, Table.S12]
