# Supplementary material for: Systems level mapping of metabolic complexity in Mycobacterium tuberculosis to identify high-value drug targets
Source: Springer Nature journal article supplement (doi:10.1186/s12967-014-0263-5), 2014-10-10

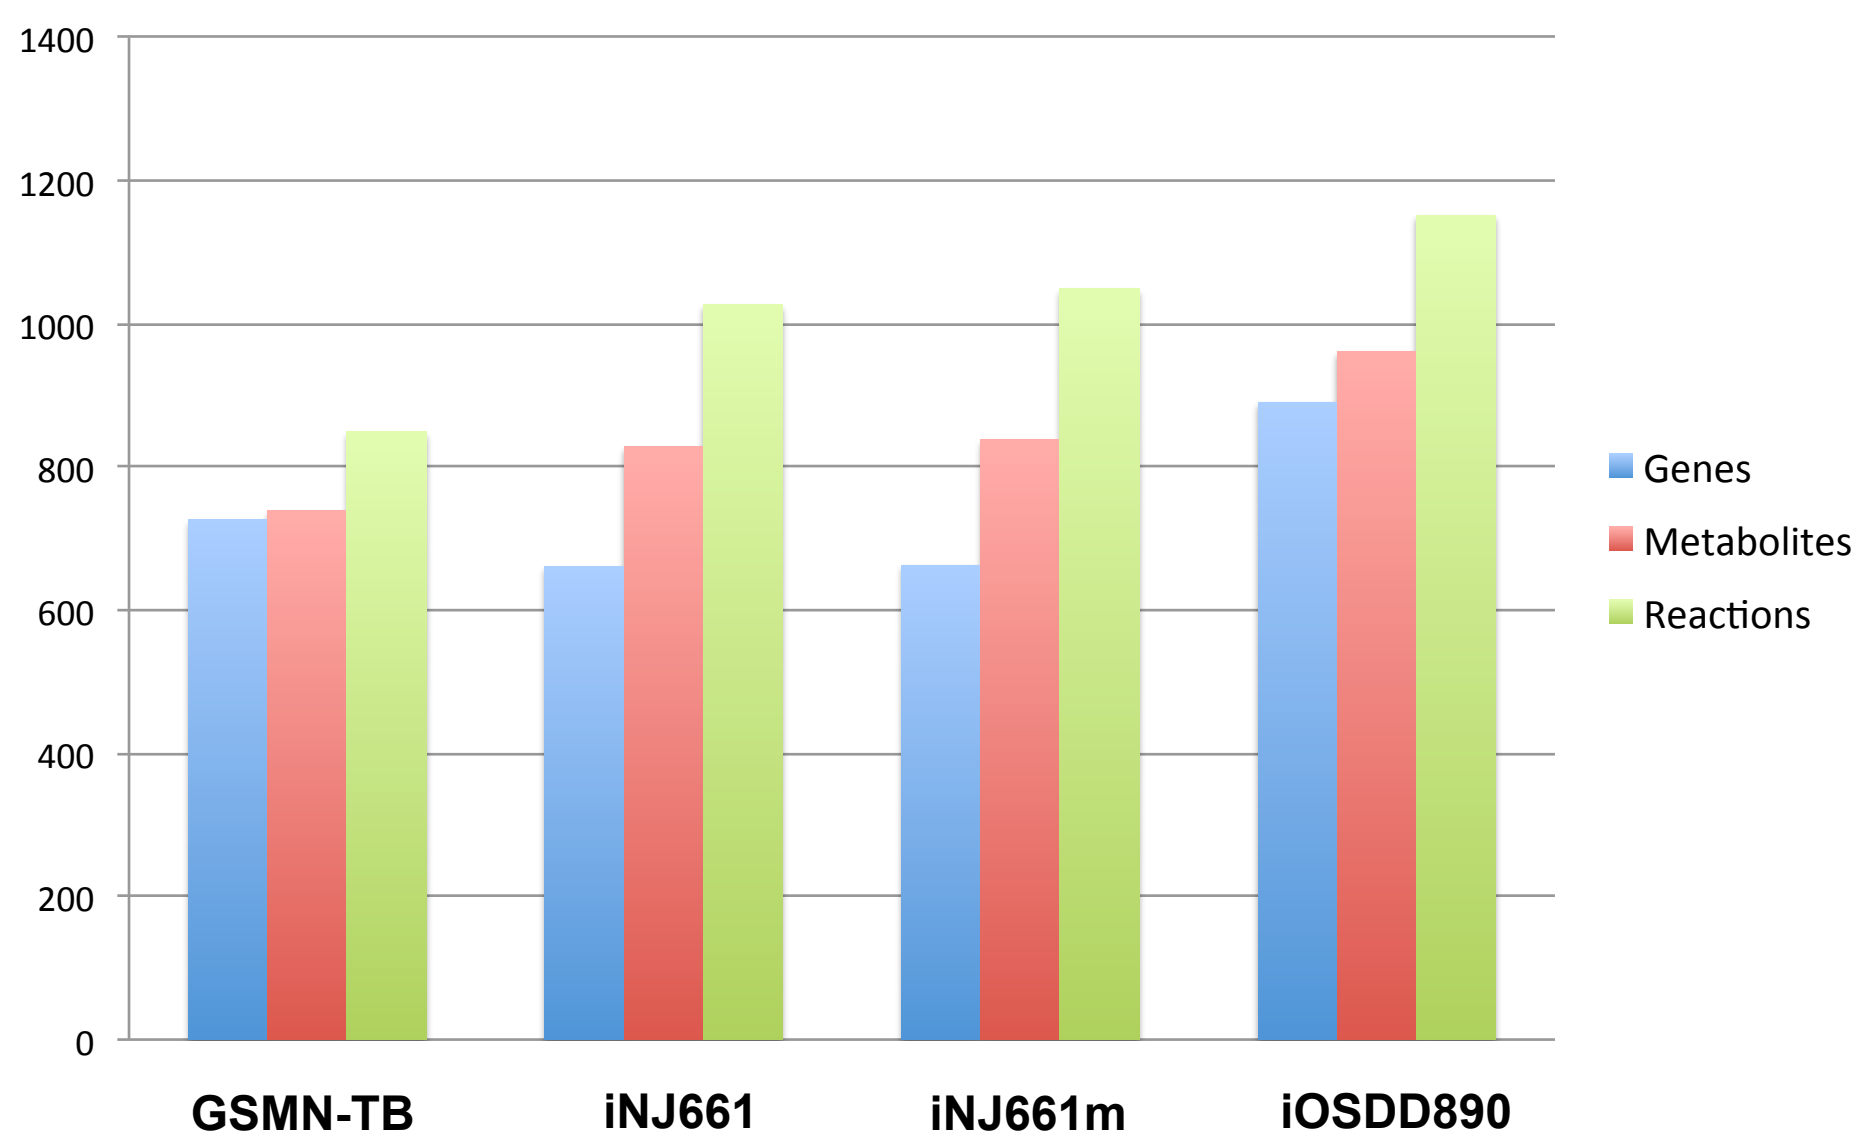

Supplement: MOESM2 [file 9766380]
