# Supplementary material for: Systems level mapping of metabolic complexity in Mycobacterium tuberculosis to identify high-value drug targets
Source: Springer Nature journal article supplement (doi:10.1186/s12967-014-0263-5), 2014-10-10
Supplement: MOESM4 [file 9766380]

## Supplementary Information

*Mapping the metabolic complexity of Mycobacterium tuberculosis to understand persister formation and identify high-value drug targets*

Rohit Vashisht, Ashwini G Bhat, Shreeram Kushwaha, Anshu Bhardwaj, OSDD Consortium and Samir K Brahmachari\*

## Contents

|    |                                                                                  |    |
|----|----------------------------------------------------------------------------------|----|
| 1  | Fig. S1 - Spindle Map Rv3795                                                     | 3  |
| 2  | Table - S15 Metabolic Persister Reactions, Genes and Pathway on Rv3795 Deletion  | 4  |
| 3  | Fig. S2 - Spindle Map Rv1908c                                                    | 16 |
| 4  | Table - S16 Metabolic Persister Reactions, Genes and Pathway on Rv1908c Deletion | 17 |
| 5  | Table - S17 Metabolic Persister Reactions, Genes and Pathway on Rv1484 Deletion  | 19 |
| 6  | Fig. S3 - Spindle Map Rv2245                                                     | 23 |
| 7  | Table - S18 Metabolic Persister Reactions, Genes and Pathway on Rv2245 Deletion  | 24 |
| 8  | Fig. S4 - Spindle Map Rv3794                                                     | 36 |
| 9  | Table - S19 Metabolic Persister Reactions, Genes and Pathway on Rv3794 Deletion  | 37 |
| 10 | Fig. S5 - Spindle Map Rv3264c                                                    | 49 |
| 11 | Table - S20 Metabolic Persister Reactions, Genes and Pathway on Rv3264c Deletion | 50 |
| 12 | Fig. S6 - Spindle Map Rv3266c                                                    | 61 |
| 13 | Table - S21 Metabolic Persister Reactions, Genes and Pathway on Rv3266c Deletion | 62 |
| 14 | Table - S22 Metabolic Persister Reactions, Genes and Pathway on Rv3790 Deletion  | 74 |

1 Fig. S1 - Spindle Map Rv3795

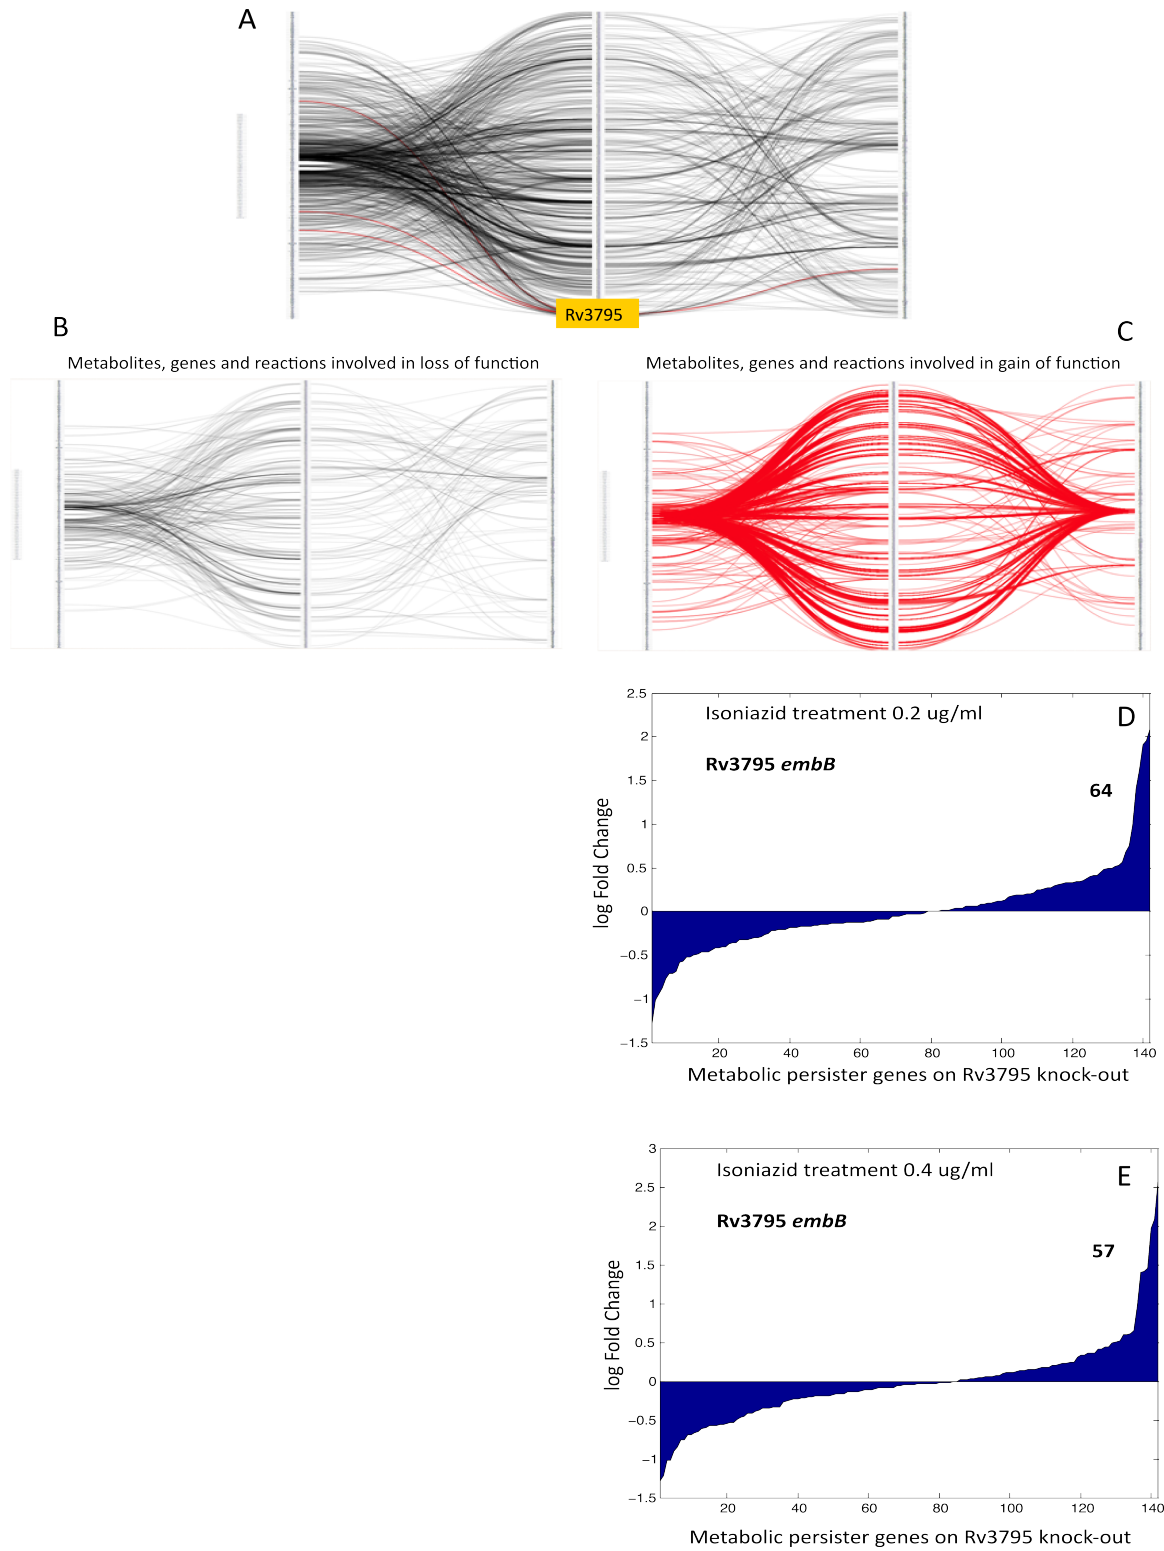

## 2 Table - S15 Metabolic Persister Reactions, Genes and Pathway on Rv3795 Deletion

Table 1: Metabolic persister reactions, gene and pathways on Rv3795 deletion

| Reaction | Description                                                    | Formula                                                                        | Genes              | Pathways                         |
|----------|----------------------------------------------------------------|--------------------------------------------------------------------------------|--------------------|----------------------------------|
| ACKr     | acetate kinase                                                 | $ac[c] + atp[c] \rightarrow actp[c] + adp[c]$                                  | Rv0409             | Pyruvate Metabolism              |
| ADK1     | adenylate kinase                                               | $amp[c] + atp[c] \rightleftharpoons 2 adp[c]$                                  | Rv0733             | Purine Metabolism                |
| ADK2     | adenylate kinase<br>Inorganic triphosphate                     | $amp[c] + pppi[c] \rightleftharpoons adp[c] + ppi[c]$                          | Rv0733             | Purine Metabolism                |
| ADK4     | adenylate kinase<br>ITP                                        | $amp[c] + itp[c] \rightleftharpoons adp[c] + idp[c]$                           | Rv0733             | Nucleotide Sugar Metabolism      |
| ARGt5r   | L arginine transport<br>via diffusion                          | $arg-L[e] \rightleftharpoons arg-L[c]$                                         | Rv2320c            | Transport                        |
| ASPO5    | L aspartate oxidase                                            | $asp-L[c] + fum[c] \rightarrow h[c] + iasp[c] + succ[c]$                       | Rv1595             | Alanine and Aspartate Metabolism |
| AST      | Arginine succinyltransferase                                   | $arg-L[c] + succoa[c] \rightarrow coa[c] + h[c] + sucarg[c]$                   |                    | Arginine and Proline Metabolism  |
| CAT      | catalase                                                       | $2 h_2o_2[c] \rightarrow 2 h_2o[c] + o_2[c]$                                   | Rv1908c            | Redox Metabolism                 |
| CO2t     | CO2 transporter via<br>diffusion                               | $co_2[e] \rightleftharpoons co_2[c]$                                           |                    | Transport                        |
| CODH2r   | carbon monoxide<br>dehydrogenase<br>acetyl CoA syn-<br>thase 2 | $co[c] + 2 fdox[c] + h_2o[c] \rightleftharpoons co_2[c] + 2 fdred[c] + 2 h[c]$ | Rv0373c<br>Rv0375c | Rv0374c<br>Redox Metabolism      |
| CODH3    | carbon monoxide<br>dehydrogenase<br>acetyl CoA syn-<br>thase 2 | $adfdOX[c] + 2 co[c] + 2 h_2o[c] \rightarrow adfdRD[c] + 2 co_2[c] + 2 h[c]$   | Rv0373c<br>Rv0375c | Rv0374c<br>Redox Metabolism      |
| DCTPD2   | dCTP deaminase                                                 | $ctp[c] + h_2o[c] + h[c] \rightarrow nh_4[c] + utp[c]$                         | Rv0321             | Pyrimidine Metabolism            |
| DHORD2   | dihydroorotic acid<br>dehydrogenase<br>quinone8                | $dhor-S[c] + q_8[c] \rightarrow orot[c] + q_8h_2[c]$                           | Rv2139             | Pyrimidine Metabolism            |
| DHORD3   | dihydroorotic acid<br>dehydrogenase<br>menaquinone 6           | $dhor-S[c] + mqn_6[c] \rightleftharpoons mql_6[c] + orot[c]$                   | Rv2139             | Pyrimidine Metabolism            |
| ECHH-0   | Ech hydrogenase no<br>electron transport                       | $2 fdox[c] + h_2[c] \rightleftharpoons 2 fdred[c] + 2 h[c]$                    |                    | Miscellaneous                    |

*Continued on next page*

Table 1 – continued from previous page

| Reaction    | Description                                        | Formula                                                                                                                         | Genes                                       | Pathways                  |
|-------------|----------------------------------------------------|---------------------------------------------------------------------------------------------------------------------------------|---------------------------------------------|---------------------------|
| ETHAt       | ethanolamine transport via diffusion extracellular | etha[e] <=> etha[c]                                                                                                             |                                             | Transport                 |
| EX-arg-L(e) | L Arginine exchange                                | arg-L[e] <=>                                                                                                                    |                                             | Exchange                  |
| EX-etha(e)  | Ethanolamine exchange                              | etha[e] <=>                                                                                                                     |                                             | Exchange                  |
| EX-gly(e)   | Glycine exchange                                   | gly[e] <=>                                                                                                                      |                                             | Exchange                  |
| EX-k(e)     | K exchange                                         | k[e] <=>                                                                                                                        |                                             | Exchange                  |
| EX-mal-L(e) | L Malate exchange                                  | mal-L[e] <=>                                                                                                                    |                                             | Exchange                  |
| EX-na1(e)   | Sodium exchange                                    | na1[e] <=>                                                                                                                      |                                             | Exchange                  |
| EX-ser-L(e) | L Serine exchange                                  | ser-L[e] <=>                                                                                                                    |                                             | Exchange                  |
| FACOAL140   | fatty acid CoA ligase tetradecanoate               | atp[c] + coa[c] + ttdca[c] <=> amp[c] + ppi[c] + tdcoa[c]                                                                       | Rv1529 Rv3826                               | Fatty Acid Metabolism     |
| FACOAL161   | fatty acid CoA ligase hexadecenoate                | atp[c] + coa[c] + hdcea[c] <=> amp[c] + hdcoa[c] + ppi[c]                                                                       | Rv1529 Rv3826                               | Fatty Acid Metabolism     |
| FAO1        | Fatty acid oxidation tetradecanoate                | atp[c] + 7 coa[c] + 6 fad[c] + 6 h2o[c] + 6 nad[c] + ttdca[c] -> 7 accoa[c] + amp[c] + 6 fadh2[c] + 6 h[c] + 6 nadh[c] + ppi[c] | Rv0468 Rv0859 Rv0860 Rv1144 Rv1323          | Fatty Acid Metabolism     |
| FORMCOAL    | formyl coa CoA ligase                              | atp[c] + coa[c] + for[c] <=> amp[c] + forcoa[c] + ppi[c]                                                                        |                                             | Redox Metabolism          |
| FRD         | fumarate reductase                                 | fadh2[c] + fum[c] -> fad[c] + succ[c]                                                                                           | Rv1552 Rv1553 Rv1554 Rv1555                 | Citric Acid Cycle         |
| FRD2        | fumarate reductase                                 | fum[c] + mql8[c] -> mqn8[c] + succ[c]                                                                                           | Rv0247c Rv0248c Rv3316 Rv3317 Rv3318 Rv3319 | Citric Acid Cycle         |
| FRD5        | fumarate reductase                                 | fum[c] + mql6[c] <=> mqn6[c] + succ[c]                                                                                          | Rv1552 Rv1553 Rv1554 Rv1555                 | Citric Acid Cycle         |
| G3PAT160    | glycerol 3 phosphate acyltransferase C160          | glyc3p[c] + palmACP[c] -> 1hdecg3p[c] + ACP[c]                                                                                  | Rv1551                                      | Fatty Acid Metabolism     |
| G6PDH2      | glucose 6 phosphate dehydrogenase                  | g6p[c] + nadp[c] -> 6pgl[c] + 3 h[c] + nadph[c]                                                                                 | Rv1121 Rv1447c                              | Pentose Phosphate Pathway |
| GLYt2r      | glycine reversible transport via proton symport    | gly[e] + h[e] <=> gly[c] + h[c]                                                                                                 | Rv1704c                                     | Transport                 |

*Continued on next page*

Table 1 – continued from previous page

| Reaction     | Description                                                            | Formula                                                                                       | Genes                                                                                                                         | Pathways                                |
|--------------|------------------------------------------------------------------------|-----------------------------------------------------------------------------------------------|-------------------------------------------------------------------------------------------------------------------------------|-----------------------------------------|
| GPDDA2       | Glycerophosphodiester phosphodiesterase<br>Glycerophospho-ethanolamine | $g3pe[c] + h2o[c] \rightarrow etha[c] + glyc3p[c] + h[c]$                                     | Rv0317c Rv2277c<br>Rv3842c                                                                                                    | Fatty Acid Metabolism                   |
| GTHOr        | glutathione oxidoreductase                                             | $gthox[c] + h[c] + nadph[c] \rightleftharpoons 2 gthrd[c] + nadp[c]$                          | Rv2855                                                                                                                        | Glutamate Metabolism                    |
| GTPDPK       | GTP diphosphokinase                                                    | $atp[c] + gtp[c] \rightarrow amp[c] + gdptp[c] + h[c]$                                        | Rv2583c                                                                                                                       | Purine Metabolism                       |
| HSDy         | homoserine dehydrogenase NADPH                                         | $hom-L[c] + nadp[c] \rightleftharpoons aspsa[c] + h[c] + nadph[c]$                            | Rv1294                                                                                                                        | Glycine Serine and Threonine Metabolism |
| Kt3r         | potassium proton antiporter                                            | $h[e] + k[c] \rightleftharpoons h[c] + k[e]$                                                  | Rv2691 Rv2692                                                                                                                 | Transport                               |
| LPLIPAL2E160 | Lysophospholipase L2 2 acylglycerophospho-ethanolamine n C160          | $2agpe160[c] + h2o[c] \rightarrow g3pe[c] + h[c] + hdca[c]$                                   | Rv0183                                                                                                                        | Fatty Acid Metabolism                   |
| L-LACD2      | L Lactate dehydrogenase ubiquinone                                     | $lac-L[c] + q8[c] \rightarrow pyr[c] + q8h2[c]$                                               | Rv1872c                                                                                                                       | Pyruvate Metabolism                     |
| MALt2r       | L malate reversible transport via proton symport                       | $h[e] + mal-L[e] \rightleftharpoons h[c] + mal-L[c]$                                          | Rv2443                                                                                                                        | Transport                               |
| ME1          | malic enzyme NAD                                                       | $mal-L[c] + nad[c] \rightarrow co2[c] + nadh[c] + pyr[c]$                                     | Rv2332                                                                                                                        | Pyruvate Metabolism                     |
| MYCTR        | mycothiol reductase nadp dependent                                     | $2 msh[c] + nadp[c] \rightleftharpoons h[c] + mssg[c] + nadph[c]$                             | Rv2855                                                                                                                        | Redox Metabolism                        |
| MYCTR2       | mycothiol reductase glutathione exchange                               | $gthox[c] + 2 msh[c] \rightleftharpoons 2 gthrd[c] + mssg[c]$                                 | Rv2855                                                                                                                        | Redox Metabolism                        |
| NADH2r       | NADH dehydrogenase                                                     | $h[c] + nadh[c] + q[c] \rightleftharpoons nad[c] + qh2[c]$                                    | Rv0082 Rv3145<br>Rv3146 Rv3147<br>Rv3148 Rv3149<br>Rv3150 Rv3151<br>Rv3152 Rv3153<br>Rv3154 Rv3155<br>Rv3156 Rv3157<br>Rv3158 | Redox Metabolism                        |
| NADS2        | NAD synthase glutamine hydrolysing                                     | $atp[c] + dnad[c] + gln-L[c] + h2o[c] \rightarrow amp[c] + glu-L[c] + h[c] + nad[c] + ppi[c]$ | Rv2438c                                                                                                                       | Glutamate Metabolism                    |

*Continued on next page*

Table 1 – continued from previous page

| Reaction   | Description                                                  | Formula                                                               | Genes         | Pathways                        |
|------------|--------------------------------------------------------------|-----------------------------------------------------------------------|---------------|---------------------------------|
| NAKtr      | potassium sodium antiporter                                  | $k[c] + na1[e] \rightleftharpoons k[e] + na1[c]$                      | Rv3236c       | Transport                       |
| NAt3-1     | sodium proton antiporter HNA is 11                           | $h[e] + na1[c] \rightleftharpoons h[c] + na1[e]$                      | Rv2287        | Transport                       |
| NDPK9      | nucleoside diphosphate kinase ATPIDP                         | $atp[c] + idp[c] \rightleftharpoons adp[c] + itp[c]$                  | Rv2445c       | Pyrimidine Metabolism           |
| NNAT       | nicotinate nucleotide adenyltransferase                      | $atp[c] + h[c] + nicrnt[c] \rightarrow dnad[c] + ppi[c]$              | Rv2421c       | Pantothenate and CoA Metabolism |
| NNDPR      | nicotinate nucleotide diphosphorylase carboxylating          | $2 h[c] + prpp[c] + quln[c] \rightarrow co2[c] + nicrnt[c] + ppi[c]$  | Rv1596        | Pantothenate and CoA Metabolism |
| ORNt       | ornithine transport via diffusion extracellular to periplasm | $orn[e] \rightleftharpoons orn[c]$                                    | Rv2320c       | Transport                       |
| OXGDC      | 2 oxoglutarate decarboxylase                                 | $akg[c] + h[c] \rightarrow co2[c] + succal[c]$                        | Rv1248c       | Citric Acid Cycle               |
| PGL        | 6 phosphogluconolactonase                                    | $6pgl[c] + h2o[c] \rightarrow 6pgc[c] + h[c]$                         | Rv1445c       | Pentose Phosphate Pathway       |
| PHTO       | phthicol oxygenase                                           | $2 o2[c] + phthclh2[c] \rightarrow 2 h[c] + 2 o2s[c] + phthcl[c]$     |               | Ubiquinone Metabolism           |
| PLIPA1E160 | Phospholipase A1 phosphatidylethanolamine C160               | $h2o[c] + pe160[c] \rightarrow 2agpe160[c] + h[c] + hdca[c]$          |               | Fatty Acid Metabolism           |
| PPDK       | Pyruvate phosphate dikinase                                  | $atp[c] + pi[c] + pyr[c] \rightarrow amp[c] + h[c] + pep[c] + ppi[c]$ | Rv1127c       | Pyruvate Metabolism             |
| PPK2       | polyphosphate kinase                                         | $atp[c] + ppi[c] \rightarrow adp[c] + pppi[c]$                        | Rv2984        | Purine Metabolism               |
| PTAr       | phosphotransacetylase                                        | $accoa[c] + pi[c] \rightleftharpoons actp[c] + coa[c]$                | Rv0408 Rv3914 | Pyruvate Metabolism             |
| QRr        | Quinone reductase                                            | $h[c] + nadph[c] + q[c] \rightleftharpoons nadp[c] + qh2[c]$          | Rv3777        | Redox Metabolism                |
| QULNS      | quinolinate synthase                                         | $dhap[c] + iasp[c] \rightarrow 2 h2o[c] + pi[c] + quln[c]$            | Rv1594        | Pantothenate and CoA Metabolism |
| SERt2r     | L serine reversible transport via proton symport             | $h[e] + ser-L[e] \rightleftharpoons h[c] + ser-L[c]$                  | Rv1704c       | Transport                       |
| SGDS       | Succinylglutamate desuccinylase                              | $h2o[c] + sucglu[c] \rightarrow glu-L[c] + succ[c]$                   |               | Arginine and Proline Metabolism |

Continued on next page

Table 1 – continued from previous page

| Reaction | Description                                 | Formula                                                                  | Genes                 | Pathways                        |
|----------|---------------------------------------------|--------------------------------------------------------------------------|-----------------------|---------------------------------|
| SGSAD    | Succinylglutamic semialdehyde dehydrogenase | $h_2o[c] + nad[c] + sucgsa[c] \rightarrow 2 h[c] + nadh[c] + sucglu[c]$  |                       | Arginine and Proline Metabolism |
| SOTA     | Succinylornithine transaminase              | $akg[c] + sucorn[c] \rightarrow glu-L[c] + sucgsa[c]$                    |                       | Arginine and Proline Metabolism |
| SPODM    | superoxide dismutase                        | $2 h[c] + 2 o_2s[c] \rightarrow h_2o_2[c] + o_2[c]$                      | Rv0432 Rv1908c Rv3846 | Cofactor Metabolism             |
| SSALy    | succinate semialdehyde dehydrogenase NADP   | $h_2o[c] + nadp[c] + succsal[c] \rightarrow 2 h[c] + nadph[c] + succ[c]$ | Rv0234c Rv1731        | Glutamate Metabolism            |
| XYLK     | xylulokinase                                | $atp[c] + xylu-D[c] \rightarrow adp[c] + h[c] + xu5p-D[c]$               | Rv0729                | Sugar Metabolism                |
| PPGPP    | PPGPP-3-pyrophosphohydrolase                | $gdpdp[c] + h_2o[c] \rightarrow gdp[c] + ppi[c]$                         |                       | Purine Metabolism               |

*Continued on next page*



Table 1 – continued from previous page

| Reaction | Description                                                                                                                                                                          | Formula                                                                          | Genes                                                                                                                                                                                                                                                                                                                                                                                                                                                                                                                                                                                                                     | Pathways                      |
|----------|--------------------------------------------------------------------------------------------------------------------------------------------------------------------------------------|----------------------------------------------------------------------------------|---------------------------------------------------------------------------------------------------------------------------------------------------------------------------------------------------------------------------------------------------------------------------------------------------------------------------------------------------------------------------------------------------------------------------------------------------------------------------------------------------------------------------------------------------------------------------------------------------------------------------|-------------------------------|
| FAD-8    | acyl-CoA dehydrogenase<br>fadE1-36 AND<br>enoyl-CoA hydratase/isomerase<br>echA1-21 AND 3-hydroxyacyl-CoA dehydrogenase<br>fadB2-5 AND<br>acetyl-CoA C-acetyltransferase<br>fadA2-13 | tdcoa[c] + fad[c] + nad[c] + coa[c] -> dodcoa[c] + fadh2[c] + nadh[c] + accoa[c] | Rv0131c Rv0154c<br>Rv0215c Rv0231<br>Rv0244c Rv0271c<br>Rv0400c Rv0752c<br>Rv0873 Rv0972c<br>Rv0975c Rv1346<br>Rv1467c Rv1679<br>Rv1933c Rv1934c<br>Rv2724c Rv2789c<br>Rv3061c Rv3139<br>Rv3140 Rv3274c<br>Rv3504 Rv3505<br>Rv3543c Rv3544c<br>Rv3560c Rv3562<br>Rv3563 Rv3564<br>Rv3573c Rv3761c<br>Rv3797 Rv0672<br>Rv2500c Rv0222<br>Rv0456c Rv0632c<br>Rv0673 Rv0675<br>Rv0971c Rv1070c<br>Rv1071c Rv1141c<br>Rv1142c Rv1472<br>Rv1935c Rv2486<br>Rv2679 Rv2831<br>Rv3039c Rv3516<br>Rv3550 Rv3774<br>Rv0905 Rv3374<br>Rv3373 Rv0468<br>Rv1715 Rv1912c<br>Rv3141 Rv0243<br>Rv1074c Rv3546<br>Rv3556c Rv1323<br>Rv0859 | Beta oxidation of fatty acids |
|          |                                                                                                                                                                                      |                                                                                  |                                                                                                                                                                                                                                                                                                                                                                                                                                                                                                                                                                                                                           | <i>Continued on next page</i> |

Table 1 – continued from previous page

| Reaction | Description                                                                                                                                                                          | Formula                                                                                   | Genes                                                                                                                                                                                                                                                                                                                                                                                                                                                                                                                                                                                                                     | Pathways                      |
|----------|--------------------------------------------------------------------------------------------------------------------------------------------------------------------------------------|-------------------------------------------------------------------------------------------|---------------------------------------------------------------------------------------------------------------------------------------------------------------------------------------------------------------------------------------------------------------------------------------------------------------------------------------------------------------------------------------------------------------------------------------------------------------------------------------------------------------------------------------------------------------------------------------------------------------------------|-------------------------------|
| FAD-9    | acyl-CoA dehydrogenase<br>fadE1-36 AND<br>enoyl-CoA hydratase/isomerase<br>echA1-21 AND 3-hydroxyacyl-CoA dehydrogenase<br>fadB2-5 AND<br>acetyl-CoA C-acetyltransferase<br>fadA2-14 | dodcoa[c] + fad[c]<br>+ nad[c] + coa[c] -><br>decoa[c] + fadh2[c] +<br>nadh[c] + accoa[c] | Rv0131c Rv0154c<br>Rv0215c Rv0231<br>Rv0244c Rv0271c<br>Rv0400c Rv0752c<br>Rv0873 Rv0972c<br>Rv0975c Rv1346<br>Rv1467c Rv1679<br>Rv1933c Rv1934c<br>Rv2724c Rv2789c<br>Rv3061c Rv3139<br>Rv3140 Rv3274c<br>Rv3504 Rv3505<br>Rv3543c Rv3544c<br>Rv3560c Rv3562<br>Rv3563 Rv3564<br>Rv3573c Rv3761c<br>Rv3797 Rv0672<br>Rv2500c Rv0222<br>Rv0456c Rv0632c<br>Rv0673 Rv0675<br>Rv0971c Rv1070c<br>Rv1071c Rv1141c<br>Rv1142c Rv1472<br>Rv1935c Rv2486<br>Rv2679 Rv2831<br>Rv3039c Rv3516<br>Rv3550 Rv3774<br>Rv0905 Rv3374<br>Rv3373 Rv0468<br>Rv1715 Rv1912c<br>Rv3141 Rv0243<br>Rv1074c Rv3546<br>Rv3556c Rv1323<br>Rv0859 | Beta oxidation of fatty acids |
|          |                                                                                                                                                                                      |                                                                                           |                                                                                                                                                                                                                                                                                                                                                                                                                                                                                                                                                                                                                           | <i>Continued on next page</i> |

Table 1 – continued from previous page

| Reaction | Description                                                                                                                                                                          | Formula                                                                          | Genes                                                                                                                                                                                                                                                                                                                                                                                                                                                                                                                                                                                                                     | Pathways                      |
|----------|--------------------------------------------------------------------------------------------------------------------------------------------------------------------------------------|----------------------------------------------------------------------------------|---------------------------------------------------------------------------------------------------------------------------------------------------------------------------------------------------------------------------------------------------------------------------------------------------------------------------------------------------------------------------------------------------------------------------------------------------------------------------------------------------------------------------------------------------------------------------------------------------------------------------|-------------------------------|
| FAD-11   | acyl-CoA dehydrogenase<br>fadE1-36 AND<br>enoyl-CoA hydratase/isomerase<br>echA1-21 AND 3-hydroxyacyl-CoA dehydrogenase<br>fadB2-5 AND<br>acetyl-CoA C-acetyltransferase<br>fadA2-16 | occoa[c] + fad[c] + nad[c] + coa[c] -> hexcoa[c] + fadh2[c] + nadh[c] + accoa[c] | Rv0131c Rv0154c<br>Rv0215c Rv0231<br>Rv0244c Rv0271c<br>Rv0400c Rv0752c<br>Rv0873 Rv0972c<br>Rv0975c Rv1346<br>Rv1467c Rv1679<br>Rv1933c Rv1934c<br>Rv2724c Rv2789c<br>Rv3061c Rv3139<br>Rv3140 Rv3274c<br>Rv3504 Rv3505<br>Rv3543c Rv3544c<br>Rv3560c Rv3562<br>Rv3563 Rv3564<br>Rv3573c Rv3761c<br>Rv3797 Rv0672<br>Rv2500c Rv0222<br>Rv0456c Rv0632c<br>Rv0673 Rv0675<br>Rv0971c Rv1070c<br>Rv1071c Rv1141c<br>Rv1142c Rv1472<br>Rv1935c Rv2486<br>Rv2679 Rv2831<br>Rv3039c Rv3516<br>Rv3550 Rv3774<br>Rv0905 Rv3374<br>Rv3373 Rv0468<br>Rv1715 Rv1912c<br>Rv3141 Rv0243<br>Rv1074c Rv3546<br>Rv3556c Rv1323<br>Rv0859 | Beta oxidation of fatty acids |
|          |                                                                                                                                                                                      |                                                                                  |                                                                                                                                                                                                                                                                                                                                                                                                                                                                                                                                                                                                                           | <i>Continued on next page</i> |

Table 1 – continued from previous page

| Reaction | Description                                                                                                                                                                          | Formula                                                                             | Genes                                                                                                                                                                                                                                                                                                                                                                                                                                                                                                                                                                                                                     | Pathways                                  |
|----------|--------------------------------------------------------------------------------------------------------------------------------------------------------------------------------------|-------------------------------------------------------------------------------------|---------------------------------------------------------------------------------------------------------------------------------------------------------------------------------------------------------------------------------------------------------------------------------------------------------------------------------------------------------------------------------------------------------------------------------------------------------------------------------------------------------------------------------------------------------------------------------------------------------------------------|-------------------------------------------|
| FAD-15   | acyl-CoA dehydrogenase<br>fadE1-36 AND<br>enoyl-CoA hydratase/isomerase<br>echA1-21 AND 3-hydroxyacyl-CoA dehydrogenase<br>fadB2-5 AND<br>acetyl-CoA C-acetyltransferase<br>fadA2-20 | hdcoa[c] + fad[c] + nad[c] + coa[c] -> c5tetdcoa[c] + fadh2[c] + nadh[c] + accoa[c] | Rv0131c Rv0154c<br>Rv0215c Rv0231<br>Rv0244c Rv0271c<br>Rv0400c Rv0752c<br>Rv0873 Rv0972c<br>Rv0975c Rv1346<br>Rv1467c Rv1679<br>Rv1933c Rv1934c<br>Rv2724c Rv2789c<br>Rv3061c Rv3139<br>Rv3140 Rv3274c<br>Rv3504 Rv3505<br>Rv3543c Rv3544c<br>Rv3560c Rv3562<br>Rv3563 Rv3564<br>Rv3573c Rv3761c<br>Rv3797 Rv0672<br>Rv2500c Rv0222<br>Rv0456c Rv0632c<br>Rv0673 Rv0675<br>Rv0971c Rv1070c<br>Rv1071c Rv1141c<br>Rv1142c Rv1472<br>Rv1935c Rv2486<br>Rv2679 Rv2831<br>Rv3039c Rv3516<br>Rv3550 Rv3774<br>Rv0905 Rv3374<br>Rv3373 Rv0468<br>Rv1715 Rv1912c<br>Rv3141 Rv0243<br>Rv1074c Rv3546<br>Rv3556c Rv1323<br>Rv0859 | Beta oxidation of unsaturated fatty acids |
|          |                                                                                                                                                                                      |                                                                                     |                                                                                                                                                                                                                                                                                                                                                                                                                                                                                                                                                                                                                           | <i>Continued on next page</i>             |

Table 1 – continued from previous page

| Reaction | Description                                                                                                                                                                          | Formula                                                                                         | Genes                                                                                                                                                                                                                                                                                                                                                                                                                                                                                                                                                                                                                     | Pathways                                        |
|----------|--------------------------------------------------------------------------------------------------------------------------------------------------------------------------------------|-------------------------------------------------------------------------------------------------|---------------------------------------------------------------------------------------------------------------------------------------------------------------------------------------------------------------------------------------------------------------------------------------------------------------------------------------------------------------------------------------------------------------------------------------------------------------------------------------------------------------------------------------------------------------------------------------------------------------------------|-------------------------------------------------|
| FAD-16   | acyl-CoA dehydrogenase<br>fadE1-36 AND<br>enoyl-CoA hydratase/isomerase<br>echA1-21 AND 3-hydroxyacyl-CoA dehydrogenase<br>fadB2-5 AND<br>acetyl-CoA C-acetyltransferase<br>fadA2-21 | c5tetdcoa[c] + fad[c]<br>+ nad[c] + coa[c] -><br>c3dodcoa[c] + fadh2[c]<br>+ nadh[c] + accoa[c] | Rv0131c Rv0154c<br>Rv0215c Rv0231<br>Rv0244c Rv0271c<br>Rv0400c Rv0752c<br>Rv0873 Rv0972c<br>Rv0975c Rv1346<br>Rv1467c Rv1679<br>Rv1933c Rv1934c<br>Rv2724c Rv2789c<br>Rv3061c Rv3139<br>Rv3140 Rv3274c<br>Rv3504 Rv3505<br>Rv3543c Rv3544c<br>Rv3560c Rv3562<br>Rv3563 Rv3564<br>Rv3573c Rv3761c<br>Rv3797 Rv0672<br>Rv2500c Rv0222<br>Rv0456c Rv0632c<br>Rv0673 Rv0675<br>Rv0971c Rv1070c<br>Rv1071c Rv1141c<br>Rv1142c Rv1472<br>Rv1935c Rv2486<br>Rv2679 Rv2831<br>Rv3039c Rv3516<br>Rv3550 Rv3774<br>Rv0905 Rv3374<br>Rv3373 Rv0468<br>Rv1715 Rv1912c<br>Rv3141 Rv0243<br>Rv1074c Rv3546<br>Rv3556c Rv1323<br>Rv0859 | Beta oxidation of<br>unsaturated fatty<br>acids |
|          |                                                                                                                                                                                      |                                                                                                 |                                                                                                                                                                                                                                                                                                                                                                                                                                                                                                                                                                                                                           | <i>Continued on next page</i>                   |

Table 1 – continued from previous page

| Reaction | Description                                                                                                                                                                          | Formula                       | Genes                                                                                                                                                                                                                                                                                                                                                                                                                                                                                                                                                                                                                     | Pathways                                  |
|----------|--------------------------------------------------------------------------------------------------------------------------------------------------------------------------------------|-------------------------------|---------------------------------------------------------------------------------------------------------------------------------------------------------------------------------------------------------------------------------------------------------------------------------------------------------------------------------------------------------------------------------------------------------------------------------------------------------------------------------------------------------------------------------------------------------------------------------------------------------------------------|-------------------------------------------|
| FAD-17   | acyl-CoA dehydrogenase<br>fadE1-36 AND<br>enoyl-CoA hydratase/isomerase<br>echA1-21 AND 3-hydroxyacyl-CoA dehydrogenase<br>fadB2-5 AND<br>acetyl-CoA C-acetyltransferase<br>fadA2-22 | c3dodcoa[c] -><br>t2dodcoa[c] | Rv0131c Rv0154c<br>Rv0215c Rv0231<br>Rv0244c Rv0271c<br>Rv0400c Rv0752c<br>Rv0873 Rv0972c<br>Rv0975c Rv1346<br>Rv1467c Rv1679<br>Rv1933c Rv1934c<br>Rv2724c Rv2789c<br>Rv3061c Rv3139<br>Rv3140 Rv3274c<br>Rv3504 Rv3505<br>Rv3543c Rv3544c<br>Rv3560c Rv3562<br>Rv3563 Rv3564<br>Rv3573c Rv3761c<br>Rv3797 Rv0672<br>Rv2500c Rv0222<br>Rv0456c Rv0632c<br>Rv0673 Rv0675<br>Rv0971c Rv1070c<br>Rv1071c Rv1141c<br>Rv1142c Rv1472<br>Rv1935c Rv2486<br>Rv2679 Rv2831<br>Rv3039c Rv3516<br>Rv3550 Rv3774<br>Rv0905 Rv3374<br>Rv3373 Rv0468<br>Rv1715 Rv1912c<br>Rv3141 Rv0243<br>Rv1074c Rv3546<br>Rv3556c Rv1323<br>Rv0859 | Beta oxidation of unsaturated fatty acids |
|          |                                                                                                                                                                                      |                               |                                                                                                                                                                                                                                                                                                                                                                                                                                                                                                                                                                                                                           | <i>Continued on next page</i>             |

Table 1 – continued from previous page

| Reaction | Description                                                                                                                                                                                     | Formula                                                   | Genes                                                                                                                                                                                                                                                                                                                                                                                                                                                                                                                                                                                                                     | Pathways                                        |
|----------|-------------------------------------------------------------------------------------------------------------------------------------------------------------------------------------------------|-----------------------------------------------------------|---------------------------------------------------------------------------------------------------------------------------------------------------------------------------------------------------------------------------------------------------------------------------------------------------------------------------------------------------------------------------------------------------------------------------------------------------------------------------------------------------------------------------------------------------------------------------------------------------------------------------|-------------------------------------------------|
| FAD-19   | acyl-CoA dehydrogenase<br>fadE1-36 AND<br>enoyl-CoA hydratase/isomerase<br>echA1-21 AND 3-<br>hydroxyacyl-CoA<br>dehydrogenase<br>fadB2-5 AND<br>acetyl-CoA C-<br>acetyltransferase<br>fadA2-24 | d2hdodcoa[c] + nad[c] -<br>> dodcoa[c] + nadh[c]          | Rv0131c Rv0154c<br>Rv0215c Rv0231<br>Rv0244c Rv0271c<br>Rv0400c Rv0752c<br>Rv0873 Rv0972c<br>Rv0975c Rv1346<br>Rv1467c Rv1679<br>Rv1933c Rv1934c<br>Rv2724c Rv2789c<br>Rv3061c Rv3139<br>Rv3140 Rv3274c<br>Rv3504 Rv3505<br>Rv3543c Rv3544c<br>Rv3560c Rv3562<br>Rv3563 Rv3564<br>Rv3573c Rv3761c<br>Rv3797 Rv0672<br>Rv2500c Rv0222<br>Rv0456c Rv0632c<br>Rv0673 Rv0675<br>Rv0971c Rv1070c<br>Rv1071c Rv1141c<br>Rv1142c Rv1472<br>Rv1935c Rv2486<br>Rv2679 Rv2831<br>Rv3039c Rv3516<br>Rv3550 Rv3774<br>Rv0905 Rv3374<br>Rv3373 Rv0468<br>Rv1715 Rv1912c<br>Rv3141 Rv0243<br>Rv1074c Rv3546<br>Rv3556c Rv1323<br>Rv0859 | Beta oxidation of<br>unsaturated fatty<br>acids |
| ALDR     | Aldolase reductase                                                                                                                                                                              | arab-D[c] + nadph[c]<br>+ h[c] -> arabl-D[c] +<br>nadp[c] |                                                                                                                                                                                                                                                                                                                                                                                                                                                                                                                                                                                                                           | Arabinogalactan<br>Synthesis                    |
| AL4D     | D-arabinitol 4-<br>dehydrogenase                                                                                                                                                                | arabl-D[c] + nad[c] -><br>xyly-D[c] + nadh[c] +<br>h[c]   | Rv1928c                                                                                                                                                                                                                                                                                                                                                                                                                                                                                                                                                                                                                   | Arabinogalactan<br>Synthesis                    |

### 3 Fig. S2 - Spindle Map Rv1908c

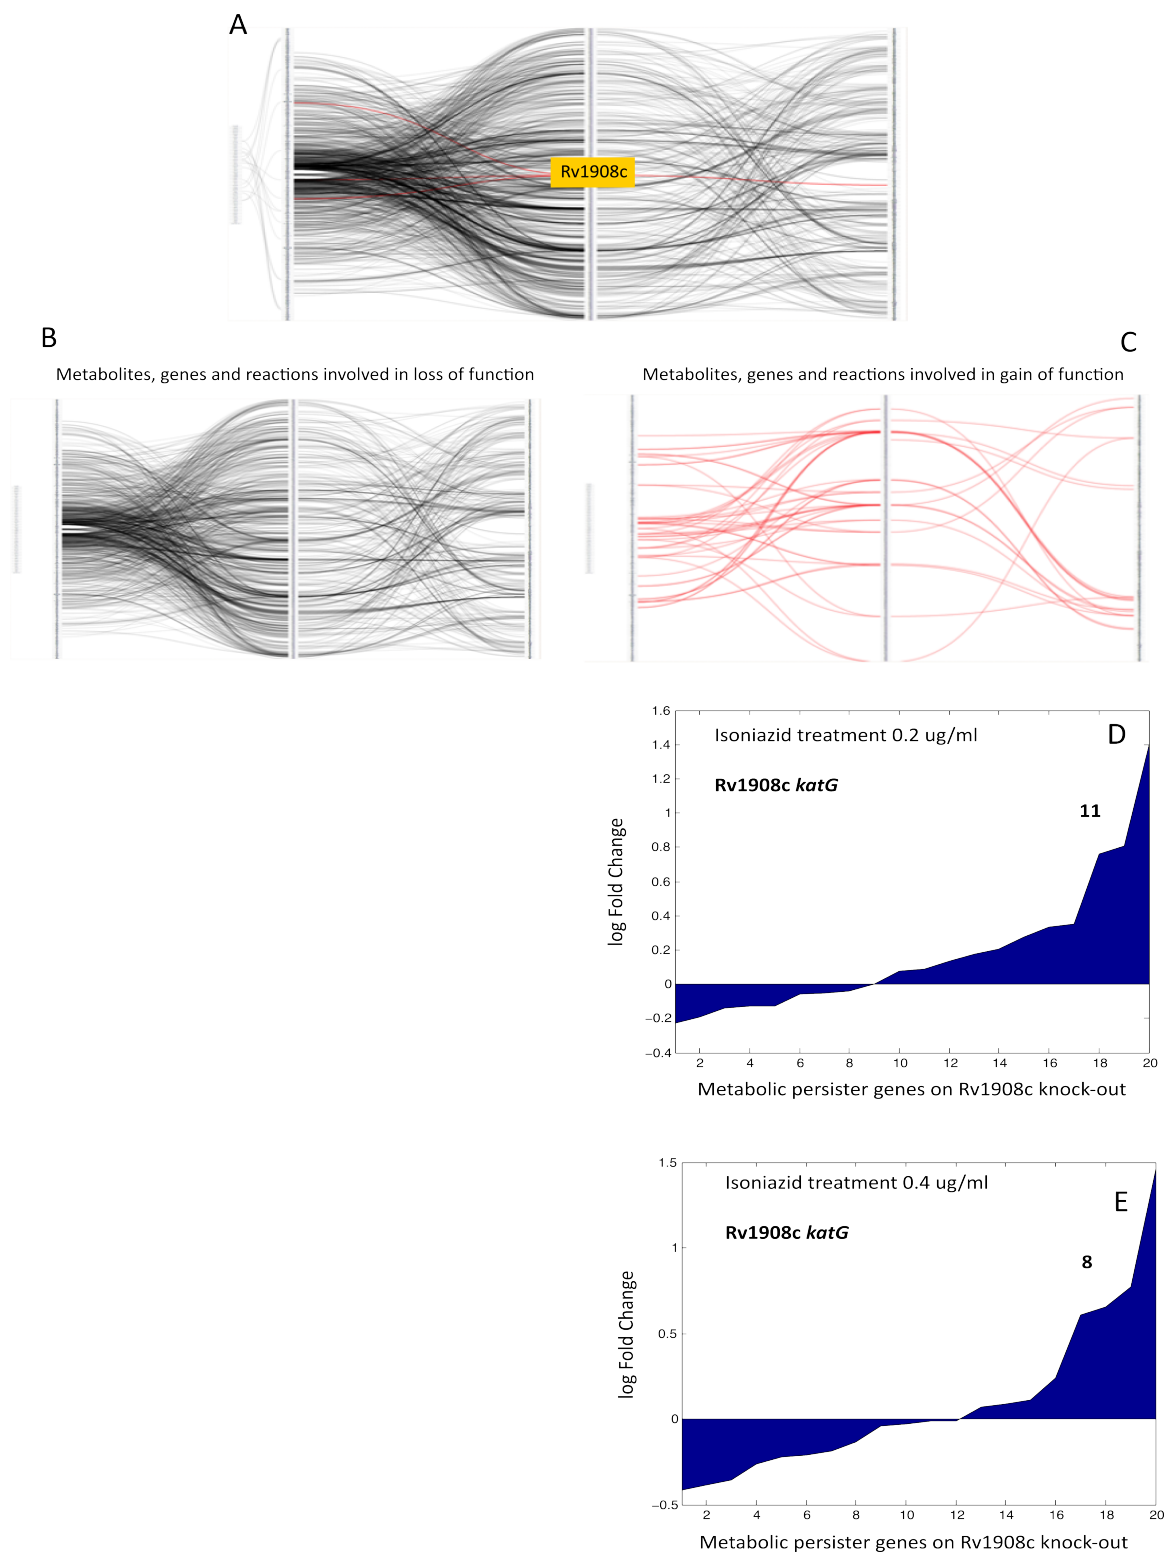



## 4 Table - S16 Metabolic Persister Reactions, Genes and Pathway on Rv1908c Deletion

Table 2: Metabolic persister reactions, gene and pathways on Rv1908c deletion

| Reaction  | Description                                                 | Formula                                                                                                                                                      | Genes         | Pathways                                |
|-----------|-------------------------------------------------------------|--------------------------------------------------------------------------------------------------------------------------------------------------------------|---------------|-----------------------------------------|
| ADK1      | adenylate kinase                                            | $\text{amp}[c] + \text{atp}[c] \rightleftharpoons 2 \text{adp}[c]$                                                                                           | Rv0733        | Purine Metabolism                       |
| AMMQT8-2  | S adenosylmethionine2 demethylmenaquinone methyltransferase | $2\text{dmmq8}[c] + \text{amet}[c] \rightarrow \text{ahcys}[c] + \text{h}[c] + \text{mqn8}[c]$                                                               |               | Ubiquinone Metabolism                   |
| ASPO5     | L aspartate oxidase                                         | $\text{asp-L}[c] + \text{fum}[c] \rightarrow \text{h}[c] + \text{iasp}[c] + \text{succ}[c]$                                                                  | Rv1595        | Alanine and Aspartate Metabolism        |
| DHNAOT    | 1 4 dihydroxy 2 naphthoate octaprenyltransferase            | $\text{dhna}[c] + \text{octdp}[c] \rightarrow 2\text{dmmq8}[c] + \text{co2}[c] + \text{h}[c] + \text{ppi}[c]$                                                | Rv0534c       | Ubiquinone Metabolism                   |
| EX-cit(e) | Citrate exchange                                            | $\text{cit}[e] \rightleftharpoons$                                                                                                                           |               | Exchange                                |
| GTPCII    | GTP cyclohydrolase II                                       | $\text{gtp}[c] + 3 \text{h2o}[c] \rightarrow 25\text{dhpp}[c] + \text{for}[c] + 2 \text{h}[c] + \text{ppi}[c]$                                               | Rv1415 Rv1940 | Riboflavin Metabolism                   |
| HSK       | homoserine kinase                                           | $\text{atp}[c] + \text{hom-L}[c] \rightarrow \text{adp}[c] + \text{h}[c] + \text{phom}[c]$                                                                   | Rv1296        | Glycine Serine and Threonine Metabolism |
| ICHORSi   | Isochorismate Synthase                                      | $\text{chor}[c] \rightarrow \text{ichor}[c]$                                                                                                                 | Rv3215        | Ubiquinone Metabolism                   |
| NADS2     | NAD synthase glutamine hydrolysing                          | $\text{atp}[c] + \text{dnad}[c] + \text{gln-L}[c] + \text{h2o}[c] \rightarrow \text{amp}[c] + \text{glu-L}[c] + \text{h}[c] + \text{nad}[c] + \text{ppi}[c]$ | Rv2438c       | Glutamate Metabolism                    |
| NNAT      | nicotinate nucleotide adenylyltransferase                   | $\text{atp}[c] + \text{h}[c] + \text{nicrnt}[c] \rightarrow \text{dnad}[c] + \text{ppi}[c]$                                                                  | Rv2421c       | Pantothenate and CoA Metabolism         |
| NNDPR     | nicotinate nucleotide diphosphorylase carboxylating         | $2 \text{h}[c] + \text{prpp}[c] + \text{quln}[c] \rightarrow \text{co2}[c] + \text{nicrnt}[c] + \text{ppi}[c]$                                               | Rv1596        | Pantothenate and CoA Metabolism         |
| NPHS      | naphthoate synthase                                         | $\text{sbzcoa}[c] \rightarrow \text{coa}[c] + \text{dhna}[c]$                                                                                                | Rv0548c       | Ubiquinone Metabolism                   |
| NTD11     | 5 nucleotidase IMP                                          | $\text{h2o}[c] + \text{imp}[c] \rightarrow \text{ins}[c] + \text{pi}[c]$                                                                                     |               | Nucleotide Sugar Metabolism             |
| PROt2r    | L proline reversible transport via proton symport           | $\text{h}[e] + \text{pro-L}[e] \rightleftharpoons \text{h}[c] + \text{pro-L}[c]$                                                                             |               | Transport                               |

*Continued on next page*

Table 2 – continued from previous page

| Reaction | Description                                                    | Formula                                                                                                                  | Genes          | Pathways                                |
|----------|----------------------------------------------------------------|--------------------------------------------------------------------------------------------------------------------------|----------------|-----------------------------------------|
| PTAr     | phosphotransacetylase                                          | $\text{eaccoa}[c] + \text{pi}[c] \rightleftharpoons \text{actp}[c] + \text{coa}[c]$                                      | Rv0408 Rv3914  | Pyruvate Metabolism                     |
| QULNS    | quinolinate synthase                                           | $\text{dhap}[c] + \text{iasp}[c] \rightarrow 2 \text{h}_2\text{o}[c] + \text{pi}[c] + \text{quln}[c]$                    | Rv1594         | Pantothenate and CoA Metabolism         |
| SHCHCS   | 2 succinyl 6 hydroxy 2 4 cyclohexadiene 1 carboxylate synthase | $\text{ichor}[c] + \text{sucsal}[c] \rightarrow 2 \text{shchc}[c] + \text{pyr}[c]$                                       | Rv0555         | Cofactor Metabolism                     |
| SSALy    | succinate semialdehyde dehydrogenase NADP                      | $\text{h}_2\text{o}[c] + \text{nadp}[c] + \text{sucsal}[c] \rightarrow 2 \text{h}[c] + \text{nadph}[c] + \text{succ}[c]$ | Rv0234c Rv1731 | Glutamate Metabolism                    |
| SUCBZL   | o succinylbenzoate CoA ligase                                  | $\text{atp}[c] + \text{coa}[c] + \text{sucbz}[c] \rightarrow \text{amp}[c] + \text{ppi}[c] + \text{sbz-coa}[c]$          | Rv0542c        | Ubiquinone Metabolism                   |
| SUCBZS   | O succinylbenzoate CoA synthase                                | $2 \text{shchc}[c] \rightarrow \text{h}_2\text{o}[c] + \text{sucbz}[c]$                                                  | Rv0553         | Ubiquinone Metabolism                   |
| THRS     | threonine synthase                                             | $\text{h}_2\text{o}[c] + \text{phom}[c] \rightarrow \text{pi}[c] + \text{thr-L}[c]$                                      | Rv1295         | Glycine Serine and Threonine Metabolism |
| VALt2r   | L valine reversible transport via proton symport               | $\text{h}[e] + \text{val-L}[e] \rightleftharpoons \text{h}[c] + \text{val-L}[c]$                                         |                | Transport                               |

## 5 Table - S17 Metabolic Persister Reactions, Genes and Pathway on Rv1484 Deletion

Table 3: Metabolic persister reactions, gene and pathways on Rv1484 deletion

| Reaction    | Description                                         | Formula                                                                                                                             | Genes                                             | Pathways                         |
|-------------|-----------------------------------------------------|-------------------------------------------------------------------------------------------------------------------------------------|---------------------------------------------------|----------------------------------|
| ADK1        | adenylate kinase                                    | $\text{amp}[c] + \text{atp}[c] \rightleftharpoons 2 \text{adp}[c]$                                                                  | Rv0733                                            | Purine Metabolism                |
| ADK2        | adenylate kinase<br>Inorganic triphosphate          | $\text{amp}[c] + \text{pppi}[c] \rightleftharpoons \text{adp}[c] + \text{ppi}[c]$                                                   | Rv0733                                            | Purine Metabolism                |
| ADK4        | adenylate kinase<br>ITP                             | $\text{amp}[c] + \text{itp}[c] \rightleftharpoons \text{adp}[c] + \text{idp}[c]$                                                    | Rv0733                                            | Nucleotide Sugar Metabolism      |
| ALAD-L      | L alanine dehydrogenase                             | $\text{ala-L}[c] + \text{h}_2\text{o}[c] + \text{nad}[c] \rightarrow \text{h}[c] + \text{nadh}[c] + \text{nh}_4[c] + \text{pyr}[c]$ | Rv2780                                            | Other Amino Acid Metabolism      |
| ASPO5       | L aspartate oxidase                                 | $\text{asp-L}[c] + \text{fum}[c] \rightarrow \text{h}[c] + \text{iasp}[c] + \text{succ}[c]$                                         | Rv1595                                            | Alanine and Aspartate Metabolism |
| CAT         | catalase                                            | $2 \text{h}_2\text{o}_2[c] \rightarrow 2 \text{h}_2\text{o}[c] + \text{o}_2[c]$                                                     | Rv1908c                                           | Redox Metabolism                 |
| CO2t        | CO2 transporter via diffusion                       | $\text{co}_2[e] \rightleftharpoons \text{co}_2[c]$                                                                                  |                                                   | Transport                        |
| CYTD        | cytidine deaminase                                  | $\text{cytd}[c] + \text{h}_2\text{o}[c] + \text{h}[c] \rightarrow \text{nh}_4[c] + \text{uri}[c]$                                   | Rv3315c                                           | Pyrimidine Metabolism            |
| CYTDt2r     | cytidine transport in via proton symport reversible | $\text{cytd}[e] + \text{h}[e] \rightleftharpoons \text{cytd}[c] + \text{h}[c]$                                                      |                                                   | Transport                        |
| DADA        | Deoxyadenosine deaminase                            | $\text{dad-2}[c] + \text{h}_2\text{o}[c] + \text{h}[c] \rightarrow \text{din}[c] + \text{nh}_4[c]$                                  |                                                   | Nucleotide Sugar Metabolism      |
| DHORD3      | dihydroorotic acid dehydrogenase<br>menaquinone 6   | $\text{dhor-S}[c] + \text{mqn6}[c] \rightleftharpoons \text{mql6}[c] + \text{orot}[c]$                                              | Rv2139                                            | Pyrimidine Metabolism            |
| EX-co2(e)   | CO2 exchange                                        | $\text{co}_2[e] \rightleftharpoons$                                                                                                 |                                                   | Exchange                         |
| EX-cytd(e)  | Cytidine exchange                                   | $\text{cytd}[e] \rightleftharpoons$                                                                                                 |                                                   | Exchange                         |
| EX-h2s(e)   | Hydrogen sulfide exchange                           | $\text{h}_2\text{s}[e] \rightleftharpoons$                                                                                          |                                                   | Exchange                         |
| EX-lac-L(e) | L Lactate exchange                                  | $\text{lac-L}[e] \rightleftharpoons$                                                                                                |                                                   | Exchange                         |
| EX-na1(e)   | Sodium exchange                                     | $\text{na1}[e] \rightleftharpoons$                                                                                                  |                                                   | Exchange                         |
| FORMCOAL    | formyl coa CoA ligase                               | $\text{atp}[c] + \text{coa}[c] + \text{for}[c] \rightleftharpoons \text{amp}[c] + \text{forcoa}[c] + \text{ppi}[c]$                 |                                                   | Redox Metabolism                 |
| FRD2        | fumarate reductase                                  | $\text{fum}[c] + \text{mql8}[c] \rightarrow \text{mqn8}[c] + \text{succ}[c]$                                                        | Rv0247c Rv0248c<br>Rv3316 Rv3317<br>Rv3318 Rv3319 | Citric Acid Cycle                |

*Continued on next page*

Table 3 – continued from previous page

| Reaction | Description                                 | Formula                                               | Genes                          | Pathways                                |
|----------|---------------------------------------------|-------------------------------------------------------|--------------------------------|-----------------------------------------|
| FRD5     | fumarate reductase                          | fum[c] + mql6[c] <=> mqn6[c] + succ[c]                | Rv1552 Rv1553<br>Rv1554 Rv1555 | Citric Acid Cycle                       |
| GCCa     | glycine cleavage complex                    | gly[c] + h[c] + lpro[c] -> alpro[c] + co2[c]          | Rv1832                         | Glycine Serine and Threonine Metabolism |
| GCCb     | glycine cleavage complex                    | alpro[c] + thf[c] -> dhlpro[c] + mlthf[c] + nh4[c]    | Rv2211c                        | Glycine Serine and Threonine Metabolism |
| GCCc     | glycine cleavage complex                    | dhlpro[c] + nad[c] -> h[c] + lpro[c] + nadh[c]        | Rv0794c Rv3303c                | Methionine Metabolism                   |
| GLCP     | glycogen phosphorylase                      | glycogen[c] + pi[c] -> g1p[c]                         | Rv1328                         | Sugar Metabolism                        |
| GLCS1    | glycogen synthase ADPGlc                    | adpglc[c] -> adp[c] + glycogen[c] + h[c]              | Rv1326c                        | Sugar Metabolism                        |
| GLGC     | glucose 1 phosphate adenyltransferase       | atp[c] + g1p[c] + h[c] -> adpglc[c] + ppi[c]          | Rv1213                         | Sugar Metabolism                        |
| GLXO1    | glyoxylate oxidase                          | glx[c] + h2o[c] + nad[c] -> 2 h[c] + nadh[c] + oxa[c] |                                | Glyoxylate Metabolism                   |
| GTHOr    | glutathione oxidoreductase                  | gthox[c] + h[c] + nadph[c] <=> 2 gthrd[c] + nadp[c]   | Rv2855                         | Glutamate Metabolism                    |
| HSDy     | homoserine dehydrogenase NADPH              | hom-L[c] + nadp[c] <=> aspsa[c] + h[c] + nadph[c]     | Rv1294                         | Glycine Serine and Threonine Metabolism |
| Kt3r     | potassium proton antiporter                 | h[e] + k[c] <=> h[c] + k[e]                           | Rv2691 Rv2692                  | Transport                               |
| L-LACD2  | L Lactate dehydrogenase ubiquinone          | lac-L[c] + q8[c] -> pyr[c] + q8h2[c]                  | Rv1872c                        | Pyruvate Metabolism                     |
| L-LACD3  | L Lactate dehydrogenase menaquinone         | lac-L[c] + mqn8[c] -> mql8[c] + pyr[c]                | Rv1872c                        | Pyruvate Metabolism                     |
| L-LACT3  | L lactate transport out via proton antiport | h[e] + lac-L[c] -> h[c] + lac-L[e]                    | Rv0191                         | Transport                               |
| ME1      | malic enzyme NAD                            | mal-L[c] + nad[c] -> co2[c] + nadh[c] + pyr[c]        | Rv2332                         | Pyruvate Metabolism                     |
| MYCTR    | mycothiol reductase nadp dependent          | 2 msh[c] + nadp[c] <=> h[c] + mssg[c] + nadph[c]      | Rv2855                         | Redox Metabolism                        |
| MYCTR2   | mycothiol reductase glutathione exchange    | gthox[c] + 2 msh[c] <=> 2 gthrd[c] + mssg[c]          | Rv2855                         | Redox Metabolism                        |

*Continued on next page*

Table 3 – continued from previous page

| Reaction | Description                                         | Formula                                                                                       | Genes                                                                        |                                                                    | Pathways                        |
|----------|-----------------------------------------------------|-----------------------------------------------------------------------------------------------|------------------------------------------------------------------------------|--------------------------------------------------------------------|---------------------------------|
| NADH2r   | NADH dehydrogenase                                  | $h[c] + nadh[c] + q[c] \rightleftharpoons nad[c] + qh2[c]$                                    | Rv0082<br>Rv3146<br>Rv3148<br>Rv3150<br>Rv3152<br>Rv3154<br>Rv3156<br>Rv3158 | Rv3145<br>Rv3147<br>Rv3149<br>Rv3151<br>Rv3153<br>Rv3155<br>Rv3157 | Redox Metabolism                |
| NADS2    | NAD synthase glutamine hydrolysing                  | $atp[c] + dnad[c] + gln-L[c] + h2o[c] \rightarrow amp[c] + glu-L[c] + h[c] + nad[c] + ppi[c]$ | Rv2438c                                                                      |                                                                    | Glutamate Metabolism            |
| NAKtr    | potassium sodium antiporter                         | $k[c] + na1[e] \rightleftharpoons k[e] + na1[c]$                                              | Rv3236c                                                                      |                                                                    | Transport                       |
| NAt3-1   | sodium proton antiporter HNA is 11                  | $h[e] + na1[c] \rightleftharpoons h[c] + na1[e]$                                              | Rv2287                                                                       |                                                                    | Transport                       |
| NDPK9    | nucleoside diphosphate kinase ATPIDP                | $atp[c] + idp[c] \rightleftharpoons adp[c] + itp[c]$                                          | Rv2445c                                                                      |                                                                    | Pyrimidine Metabolism           |
| NNAT     | nicotinate nucleotide adenyltransferase             | $atp[c] + h[c] + nicrnt[c] \rightarrow dnad[c] + ppi[c]$                                      | Rv2421c                                                                      |                                                                    | Pantothenate and CoA Metabolism |
| NNDPR    | nicotinate nucleotide diphosphorylase carboxylating | $2 h[c] + prpp[c] + quln[c] \rightarrow co2[c] + nicrnt[c] + ppi[c]$                          | Rv1596                                                                       |                                                                    | Pantothenate and CoA Metabolism |
| NTD11    | 5 nucleotidase IMP                                  | $h2o[c] + imp[c] \rightarrow ins[c] + pi[c]$                                                  |                                                                              |                                                                    | Nucleotide Sugar Metabolism     |
| NTD2     | 5 nucleotidase UMP                                  | $h2o[c] + ump[c] \rightarrow pi[c] + uri[c]$                                                  |                                                                              |                                                                    | Pyrimidine Metabolism           |
| NTD7     | 5 nucleotidase AMP                                  | $amp[c] + h2o[c] \rightarrow adn[c] + pi[c]$                                                  |                                                                              |                                                                    | Nucleotide Sugar Metabolism     |
| OXACOAL  | oxalate coa ligase                                  | $atp[c] + coa[c] + oxa[c] \rightleftharpoons amp[c] + oxalcoa[c] + ppi[c]$                    |                                                                              |                                                                    | Glyoxylate Metabolism           |
| OXCDC    | Oxalyl CoA decarboxylase                            | $h[c] + oxalcoa[c] \rightarrow co2[c] + forcoa[c]$                                            | Rv0118c                                                                      |                                                                    | Glyoxylate Metabolism           |
| PHTO     | phthicol oxygenase                                  | $2 o2[c] + phthclh2[c] \rightarrow 2 h[c] + 2 o2s[c] + phthcl[c]$                             |                                                                              |                                                                    | Ubiquinone Metabolism           |
| PPK2     | polyphosphate kinase                                | $atp[c] + ppi[c] \rightarrow adp[c] + pppi[c]$                                                | Rv2984                                                                       |                                                                    | Purine Metabolism               |
| PUNP2    | purine nucleoside phosphorylase Deoxyadenosine      | $dad-2[c] + pi[c] \rightleftharpoons 2dr1p[c] + ade[c]$                                       | Rv3307                                                                       |                                                                    | Purine Metabolism               |

*Continued on next page*

Table 3 – continued from previous page

| Reaction | Description                                     | Formula                                                                                           | Genes            | Pathways                        |
|----------|-------------------------------------------------|---------------------------------------------------------------------------------------------------|------------------|---------------------------------|
| PUNP6    | purine nucleoside phosphorylase<br>Deoxyinosine | $\text{din}[c] + \text{pi}[c] \rightleftharpoons 2\text{dr1p}[c] + \text{hxan}[c]$                | Rv3307           | Purine Metabolism               |
| QRr      | Quinone reductase                               | $\text{h}[c] + \text{nadph}[c] + \text{q}[c] \rightleftharpoons \text{nadp}[c] + \text{qh2}[c]$   | Rv3777           | Redox Metabolism                |
| QULNS    | quinolinate synthase                            | $\text{dhap}[c] + \text{iasp}[c] \rightarrow 2 \text{h2o}[c] + \text{pi}[c] + \text{quln}[c]$     | Rv1594           | Pantothenate and CoA Metabolism |
| SPODM    | superoxide dismutase                            | $2 \text{h}[c] + 2 \text{o2s}[c] \rightarrow 2 \text{h2o2}[c] + \text{o2}[c]$                     | Rv0432<br>Rv3846 | Rv1908c<br>Cofactor Metabolism  |
| XYLK     | xylulokinase                                    | $\text{atp}[c] + \text{xylu-D}[c] \rightarrow \text{adp}[c] + \text{h}[c] + \text{xu5p-D}[c]$     | Rv0729           | Sugar Metabolism                |
| ALDR     | Aldolase reductase                              | $\text{arab-D}[c] + \text{nadph}[c] + \text{h}[c] \rightarrow \text{arabl-D}[c] + \text{nadp}[c]$ |                  | Arabinogalactan Synthesis       |
| AL4D     | D-arabinitol 4-dehydrogenase                    | $\text{arabl-D}[c] + \text{nad}[c] \rightarrow \text{xylu-D}[c] + \text{nadh}[c] + \text{h}[c]$   | Rv1928c          | Arabinogalactan Synthesis       |

## 6 Fig. S3 - Spindle Map Rv2245

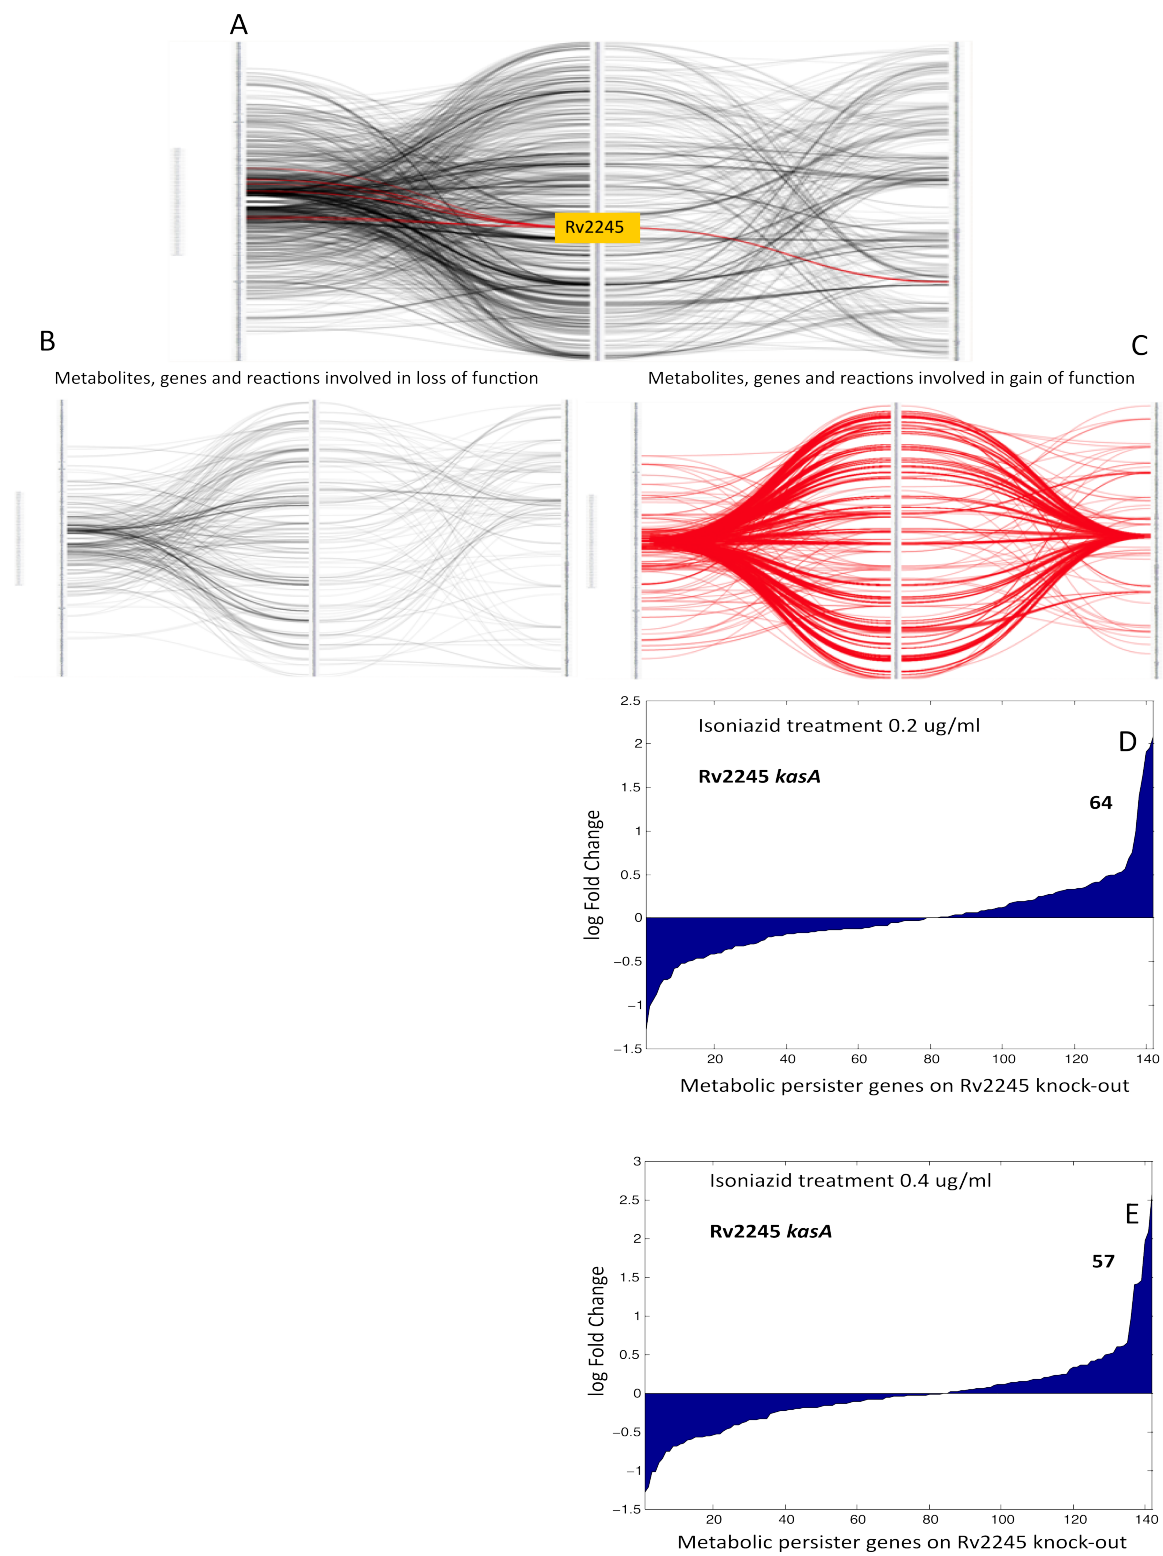

## 7 Table - S18 Metabolic Persister Reactions, Genes and Pathway on Rv2245 Deletion

Table 4: Metabolic persister reactions, gene and pathways on Rv2245 deletion

| Reaction | Description                                                    | Formula                                                                        | Genes              | Pathways                         |                  |
|----------|----------------------------------------------------------------|--------------------------------------------------------------------------------|--------------------|----------------------------------|------------------|
| ACKr     | acetate kinase                                                 | $ac[c] + atp[c] \rightarrow actp[c] + adp[c]$                                  | Rv0409             | Pyruvate Metabolism              |                  |
| ADK1     | adenylate kinase                                               | $amp[c] + atp[c] \rightleftharpoons 2 adp[c]$                                  | Rv0733             | Purine Metabolism                |                  |
| ADK2     | adenylate kinase<br>Inorganic triphosphate                     | $amp[c] + pppi[c] \rightleftharpoons adp[c] + ppi[c]$                          | Rv0733             | Purine Metabolism                |                  |
| ADK4     | adenylate kinase<br>ITP                                        | $amp[c] + itp[c] \rightleftharpoons adp[c] + idp[c]$                           | Rv0733             | Nucleotide Sugar Metabolism      |                  |
| ARGt5r   | L arginine transport<br>via diffusion                          | $arg-L[e] \rightleftharpoons arg-L[c]$                                         | Rv2320c            | Transport                        |                  |
| ASPO5    | L aspartate oxidase                                            | $asp-L[c] + fum[c] \rightarrow h[c] + iasp[c] + succ[c]$                       | Rv1595             | Alanine and Aspartate Metabolism |                  |
| AST      | Arginine succinyltransferase                                   | $arg-L[c] + succoa[c] \rightarrow coa[c] + h[c] + sucarg[c]$                   |                    | Arginine and Proline Metabolism  |                  |
| CAT      | catalase                                                       | $2 h_2o_2[c] \rightarrow 2 h_2o[c] + o_2[c]$                                   | Rv1908c            | Redox Metabolism                 |                  |
| CO2t     | CO2 transporter via<br>diffusion                               | $co_2[e] \rightleftharpoons co_2[c]$                                           |                    | Transport                        |                  |
| CODH2r   | carbon monoxide<br>dehydrogenase<br>acetyl CoA syn-<br>thase 2 | $co[c] + 2 fdox[c] + h_2o[c] \rightleftharpoons co_2[c] + 2 fdred[c] + 2 h[c]$ | Rv0373c<br>Rv0375c | Rv0374c                          | Redox Metabolism |
| CODH3    | carbon monoxide<br>dehydrogenase<br>acetyl CoA syn-<br>thase 2 | $adfdOX[c] + 2 co[c] + 2 h_2o[c] \rightarrow adfdRD[c] + 2 co_2[c] + 2 h[c]$   | Rv0373c<br>Rv0375c | Rv0374c                          | Redox Metabolism |
| DCTPD2   | dCTP deaminase                                                 | $ctp[c] + h_2o[c] + h[c] \rightarrow nh_4[c] + utp[c]$                         | Rv0321             | Pyrimidine Metabolism            |                  |
| DHORD2   | dihydroorotic acid<br>dehydrogenase<br>quinone8                | $dhor-S[c] + q_8[c] \rightarrow orot[c] + q_8h_2[c]$                           | Rv2139             | Pyrimidine Metabolism            |                  |
| DHORD3   | dihydroorotic acid<br>dehydrogenase<br>menaquinone 6           | $dhor-S[c] + mqn_6[c] \rightleftharpoons mql_6[c] + orot[c]$                   | Rv2139             | Pyrimidine Metabolism            |                  |
| ECHH-0   | Ech hydrogenase no<br>electron transport                       | $2 fdox[c] + h_2[c] \rightleftharpoons 2 fdred[c] + 2 h[c]$                    |                    | Miscellaneous                    |                  |

*Continued on next page*



Table 4 – continued from previous page

| Reaction    | Description                                        | Formula                                                                                                                         | Genes                                       | Pathways                  |
|-------------|----------------------------------------------------|---------------------------------------------------------------------------------------------------------------------------------|---------------------------------------------|---------------------------|
| ETHAt       | ethanolamine transport via diffusion extracellular | etha[e] <=> etha[c]                                                                                                             |                                             | Transport                 |
| EX-arg-L(e) | L Arginine exchange                                | arg-L[e] <=>                                                                                                                    |                                             | Exchange                  |
| EX-etha(e)  | Ethanolamine exchange                              | etha[e] <=>                                                                                                                     |                                             | Exchange                  |
| EX-gly(e)   | Glycine exchange                                   | gly[e] <=>                                                                                                                      |                                             | Exchange                  |
| EX-k(e)     | K exchange                                         | k[e] <=>                                                                                                                        |                                             | Exchange                  |
| EX-mal-L(e) | L Malate exchange                                  | mal-L[e] <=>                                                                                                                    |                                             | Exchange                  |
| EX-na1(e)   | Sodium exchange                                    | na1[e] <=>                                                                                                                      |                                             | Exchange                  |
| EX-ser-L(e) | L Serine exchange                                  | ser-L[e] <=>                                                                                                                    |                                             | Exchange                  |
| FACOAL140   | fatty acid CoA ligase tetradecanoate               | atp[c] + coa[c] + ttdca[c] <=> amp[c] + ppi[c] + tdcoa[c]                                                                       | Rv1529 Rv3826                               | Fatty Acid Metabolism     |
| FACOAL161   | fatty acid CoA ligase hexadecenoate                | atp[c] + coa[c] + hdcea[c] <=> amp[c] + hdcoa[c] + ppi[c]                                                                       | Rv1529 Rv3826                               | Fatty Acid Metabolism     |
| FAO1        | Fatty acid oxidation tetradecanoate                | atp[c] + 7 coa[c] + 6 fad[c] + 6 h2o[c] + 6 nad[c] + ttdca[c] -> 7 accoa[c] + amp[c] + 6 fadh2[c] + 6 h[c] + 6 nadh[c] + ppi[c] | Rv0468 Rv0859 Rv0860 Rv1144 Rv1323          | Fatty Acid Metabolism     |
| FORMCOAL    | formyl coa CoA ligase                              | atp[c] + coa[c] + for[c] <=> amp[c] + forcoa[c] + ppi[c]                                                                        |                                             | Redox Metabolism          |
| FRD         | fumarate reductase                                 | fadh2[c] + fum[c] -> fad[c] + succ[c]                                                                                           | Rv1552 Rv1553 Rv1554 Rv1555                 | Citric Acid Cycle         |
| FRD2        | fumarate reductase                                 | fum[c] + mql8[c] -> mqn8[c] + succ[c]                                                                                           | Rv0247c Rv0248c Rv3316 Rv3317 Rv3318 Rv3319 | Citric Acid Cycle         |
| FRD5        | fumarate reductase                                 | fum[c] + mql6[c] <=> mqn6[c] + succ[c]                                                                                          | Rv1552 Rv1553 Rv1554 Rv1555                 | Citric Acid Cycle         |
| G3PAT160    | glycerol 3 phosphate acyltransferase C160          | glyc3p[c] + palmACP[c] -> 1hdecg3p[c] + ACP[c]                                                                                  | Rv1551                                      | Fatty Acid Metabolism     |
| G6PDH2      | glucose 6 phosphate dehydrogenase                  | g6p[c] + nadp[c] -> 6pgl[c] + 3 h[c] + nadph[c]                                                                                 | Rv1121 Rv1447c                              | Pentose Phosphate Pathway |
| GLYt2r      | glycine reversible transport via proton symport    | gly[e] + h[e] <=> gly[c] + h[c]                                                                                                 | Rv1704c                                     | Transport                 |

*Continued on next page*

Table 4 – continued from previous page

| Reaction     | Description                                                   | Formula                                                                                       | Genes                                                                                                                         | Pathways                                |
|--------------|---------------------------------------------------------------|-----------------------------------------------------------------------------------------------|-------------------------------------------------------------------------------------------------------------------------------|-----------------------------------------|
| GPDDA2       | Glycerophosphodiesterase<br>Glycerophospho-ethanolamine       | $g3pe[c] + h2o[c] \rightarrow etha[c] + glyc3p[c] + h[c]$                                     | Rv0317c Rv2277c<br>Rv3842c                                                                                                    | Fatty Acid Metabolism                   |
| GTHOr        | glutathione oxidoreductase                                    | $gthox[c] + h[c] + nadph[c] \rightleftharpoons 2 gthrd[c] + nadp[c]$                          | Rv2855                                                                                                                        | Glutamate Metabolism                    |
| GTPDPK       | GTP diphosphokinase                                           | $atp[c] + gtp[c] \rightarrow amp[c] + gdptp[c] + h[c]$                                        | Rv2583c                                                                                                                       | Purine Metabolism                       |
| HSDy         | homoserine dehydrogenase NADPH                                | $hom-L[c] + nadp[c] \rightleftharpoons aspsa[c] + h[c] + nadph[c]$                            | Rv1294                                                                                                                        | Glycine Serine and Threonine Metabolism |
| Kt3r         | potassium proton antiporter                                   | $h[e] + k[c] \rightleftharpoons h[c] + k[e]$                                                  | Rv2691 Rv2692                                                                                                                 | Transport                               |
| LPLIPAL2E160 | Lysophospholipase L2 2 acylglycerophospho-ethanolamine n C160 | $2agpe160[c] + h2o[c] \rightarrow g3pe[c] + h[c] + hdca[c]$                                   | Rv0183                                                                                                                        | Fatty Acid Metabolism                   |
| L-LACD2      | L Lactate dehydrogenase ubiquinone                            | $lac-L[c] + q8[c] \rightarrow pyr[c] + q8h2[c]$                                               | Rv1872c                                                                                                                       | Pyruvate Metabolism                     |
| MALt2r       | L malate reversible transport via proton symport              | $h[e] + mal-L[e] \rightleftharpoons h[c] + mal-L[c]$                                          | Rv2443                                                                                                                        | Transport                               |
| ME1          | malic enzyme NAD                                              | $mal-L[c] + nad[c] \rightarrow co2[c] + nadh[c] + pyr[c]$                                     | Rv2332                                                                                                                        | Pyruvate Metabolism                     |
| MYCTR        | mycothiol reductase nadp dependent                            | $2 msh[c] + nadp[c] \rightleftharpoons h[c] + mssg[c] + nadph[c]$                             | Rv2855                                                                                                                        | Redox Metabolism                        |
| MYCTR2       | mycothiol reductase glutathione exchange                      | $gthox[c] + 2 msh[c] \rightleftharpoons 2 gthrd[c] + mssg[c]$                                 | Rv2855                                                                                                                        | Redox Metabolism                        |
| NADH2r       | NADH dehydrogenase                                            | $h[c] + nadh[c] + q[c] \rightleftharpoons nad[c] + qh2[c]$                                    | Rv0082 Rv3145<br>Rv3146 Rv3147<br>Rv3148 Rv3149<br>Rv3150 Rv3151<br>Rv3152 Rv3153<br>Rv3154 Rv3155<br>Rv3156 Rv3157<br>Rv3158 | Redox Metabolism                        |
| NADS2        | NAD synthase glutamine hydrolysing                            | $atp[c] + dnad[c] + gln-L[c] + h2o[c] \rightarrow amp[c] + glu-L[c] + h[c] + nad[c] + ppi[c]$ | Rv2438c                                                                                                                       | Glutamate Metabolism                    |

*Continued on next page*

Table 4 – continued from previous page

| Reaction   | Description                                                  | Formula                                                               | Genes         | Pathways                        |
|------------|--------------------------------------------------------------|-----------------------------------------------------------------------|---------------|---------------------------------|
| NAKtr      | potassium sodium antiporter                                  | $k[c] + na1[e] \rightleftharpoons k[e] + na1[c]$                      | Rv3236c       | Transport                       |
| NAt3-1     | sodium proton antiporter HNA is 11                           | $h[e] + na1[c] \rightleftharpoons h[c] + na1[e]$                      | Rv2287        | Transport                       |
| NDPK9      | nucleoside diphosphate kinase ATPIDP                         | $atp[c] + idp[c] \rightleftharpoons adp[c] + itp[c]$                  | Rv2445c       | Pyrimidine Metabolism           |
| NNAT       | nicotinate nucleotide adenylyl-transferase                   | $atp[c] + h[c] + nicrnt[c] \rightarrow dnad[c] + ppi[c]$              | Rv2421c       | Pantothenate and CoA Metabolism |
| NNDPR      | nicotinate nucleotide diphosphorylase carboxylating          | $2 h[c] + prpp[c] + quln[c] \rightarrow co2[c] + nicrnt[c] + ppi[c]$  | Rv1596        | Pantothenate and CoA Metabolism |
| ORNt       | ornithine transport via diffusion extracellular to periplasm | $orn[e] \rightleftharpoons orn[c]$                                    | Rv2320c       | Transport                       |
| OXGDC      | 2 oxoglutarate decarboxylase                                 | $akg[c] + h[c] \rightarrow co2[c] + sucsal[c]$                        | Rv1248c       | Citric Acid Cycle               |
| PGL        | 6 phosphogluconolactonase                                    | $6pgl[c] + h2o[c] \rightarrow 6pgc[c] + h[c]$                         | Rv1445c       | Pentose Phosphate Pathway       |
| PHTO       | phthicol oxygenase                                           | $2 o2[c] + phthclh2[c] \rightarrow 2 h[c] + 2 o2s[c] + phthcl[c]$     |               | Ubiquinone Metabolism           |
| PLIPA1E160 | Phospholipase A1 phosphatidylethanolamine C160               | $h2o[c] + pe160[c] \rightarrow 2agpe160[c] + h[c] + hdca[c]$          |               | Fatty Acid Metabolism           |
| PPDK       | Pyruvate phosphate dikinase                                  | $atp[c] + pi[c] + pyr[c] \rightarrow amp[c] + h[c] + pep[c] + ppi[c]$ | Rv1127c       | Pyruvate Metabolism             |
| PPK2       | polyphosphate kinase                                         | $atp[c] + ppi[c] \rightarrow adp[c] + pppi[c]$                        | Rv2984        | Purine Metabolism               |
| PTAr       | phosphotransacetylase                                        | $accoa[c] + pi[c] \rightleftharpoons actp[c] + coa[c]$                | Rv0408 Rv3914 | Pyruvate Metabolism             |
| QRr        | Quinone reductase                                            | $h[c] + nadph[c] + q[c] \rightleftharpoons nadp[c] + qh2[c]$          | Rv3777        | Redox Metabolism                |
| QULNS      | quinolinate synthase                                         | $dhap[c] + iasp[c] \rightarrow 2 h2o[c] + pi[c] + quln[c]$            | Rv1594        | Pantothenate and CoA Metabolism |
| SERt2r     | L serine reversible transport via proton symport             | $h[e] + ser-L[e] \rightleftharpoons h[c] + ser-L[c]$                  | Rv1704c       | Transport                       |
| SGDS       | Succinylglutamate desuccinylase                              | $h2o[c] + sucglu[c] \rightarrow glu-L[c] + succ[c]$                   |               | Arginine and Proline Metabolism |

Continued on next page

Table 4 – continued from previous page

| Reaction | Description                                 | Formula                                                                  | Genes                 | Pathways                        |
|----------|---------------------------------------------|--------------------------------------------------------------------------|-----------------------|---------------------------------|
| SGSAD    | Succinylglutamic semialdehyde dehydrogenase | $h_2o[c] + nad[c] + sucgsa[c] \rightarrow 2 h[c] + nadh[c] + sucglu[c]$  |                       | Arginine and Proline Metabolism |
| SOTA     | Succinylornithine transaminase              | $akg[c] + sucorn[c] \rightarrow glu-L[c] + sucgsa[c]$                    |                       | Arginine and Proline Metabolism |
| SPODM    | superoxide dismutase                        | $2 h[c] + 2 o_2s[c] \rightarrow h_2o_2[c] + o_2[c]$                      | Rv0432 Rv1908c Rv3846 | Cofactor Metabolism             |
| SSALy    | succinate semialdehyde dehydrogenase NADP   | $h_2o[c] + nadp[c] + succsal[c] \rightarrow 2 h[c] + nadph[c] + succ[c]$ | Rv0234c Rv1731        | Glutamate Metabolism            |
| XYLK     | xylulokinase                                | $atp[c] + xylu-D[c] \rightarrow adp[c] + h[c] + xu5p-D[c]$               | Rv0729                | Sugar Metabolism                |
| PPGPP    | PPGPP-3-pyrophosphohydrolase                | $gdpdp[c] + h_2o[c] \rightarrow gdp[c] + ppi[c]$                         |                       | Purine Metabolism               |

*Continued on next page*

Table 4 – continued from previous page

| Reaction | Description                                                                                                                                                                          | Formula                                                                          | Genes                                                                                                                                                                                                                                                                                                                                                                                                                                                                                                                                                                                                                     | Pathways                      |
|----------|--------------------------------------------------------------------------------------------------------------------------------------------------------------------------------------|----------------------------------------------------------------------------------|---------------------------------------------------------------------------------------------------------------------------------------------------------------------------------------------------------------------------------------------------------------------------------------------------------------------------------------------------------------------------------------------------------------------------------------------------------------------------------------------------------------------------------------------------------------------------------------------------------------------------|-------------------------------|
| FAD-8    | acyl-CoA dehydrogenase<br>fadE1-36 AND<br>enoyl-CoA hydratase/isomerase<br>echA1-21 AND 3-hydroxyacyl-CoA dehydrogenase<br>fadB2-5 AND<br>acetyl-CoA C-acetyltransferase<br>fadA2-13 | tdcoa[c] + fad[c] + nad[c] + coa[c] -> dodcoa[c] + fadh2[c] + nadh[c] + accoa[c] | Rv0131c Rv0154c<br>Rv0215c Rv0231<br>Rv0244c Rv0271c<br>Rv0400c Rv0752c<br>Rv0873 Rv0972c<br>Rv0975c Rv1346<br>Rv1467c Rv1679<br>Rv1933c Rv1934c<br>Rv2724c Rv2789c<br>Rv3061c Rv3139<br>Rv3140 Rv3274c<br>Rv3504 Rv3505<br>Rv3543c Rv3544c<br>Rv3560c Rv3562<br>Rv3563 Rv3564<br>Rv3573c Rv3761c<br>Rv3797 Rv0672<br>Rv2500c Rv0222<br>Rv0456c Rv0632c<br>Rv0673 Rv0675<br>Rv0971c Rv1070c<br>Rv1071c Rv1141c<br>Rv1142c Rv1472<br>Rv1935c Rv2486<br>Rv2679 Rv2831<br>Rv3039c Rv3516<br>Rv3550 Rv3774<br>Rv0905 Rv3374<br>Rv3373 Rv0468<br>Rv1715 Rv1912c<br>Rv3141 Rv0243<br>Rv1074c Rv3546<br>Rv3556c Rv1323<br>Rv0859 | Beta oxidation of fatty acids |
|          |                                                                                                                                                                                      |                                                                                  |                                                                                                                                                                                                                                                                                                                                                                                                                                                                                                                                                                                                                           | <i>Continued on next page</i> |

Table 4 – continued from previous page

| Reaction | Description                                                                                                                                                                          | Formula                                                                                   | Genes                                                                                                                                                                                                                                                                                                                                                                                                                                                                                                                                                                                                                     | Pathways                      |
|----------|--------------------------------------------------------------------------------------------------------------------------------------------------------------------------------------|-------------------------------------------------------------------------------------------|---------------------------------------------------------------------------------------------------------------------------------------------------------------------------------------------------------------------------------------------------------------------------------------------------------------------------------------------------------------------------------------------------------------------------------------------------------------------------------------------------------------------------------------------------------------------------------------------------------------------------|-------------------------------|
| FAD-9    | acyl-CoA dehydrogenase<br>fadE1-36 AND<br>enoyl-CoA hydratase/isomerase<br>echA1-21 AND 3-hydroxyacyl-CoA dehydrogenase<br>fadB2-5 AND<br>acetyl-CoA C-acetyltransferase<br>fadA2-14 | dodcoa[c] + fad[c]<br>+ nad[c] + coa[c] -><br>decoa[c] + fadh2[c] +<br>nadh[c] + accoa[c] | Rv0131c Rv0154c<br>Rv0215c Rv0231<br>Rv0244c Rv0271c<br>Rv0400c Rv0752c<br>Rv0873 Rv0972c<br>Rv0975c Rv1346<br>Rv1467c Rv1679<br>Rv1933c Rv1934c<br>Rv2724c Rv2789c<br>Rv3061c Rv3139<br>Rv3140 Rv3274c<br>Rv3504 Rv3505<br>Rv3543c Rv3544c<br>Rv3560c Rv3562<br>Rv3563 Rv3564<br>Rv3573c Rv3761c<br>Rv3797 Rv0672<br>Rv2500c Rv0222<br>Rv0456c Rv0632c<br>Rv0673 Rv0675<br>Rv0971c Rv1070c<br>Rv1071c Rv1141c<br>Rv1142c Rv1472<br>Rv1935c Rv2486<br>Rv2679 Rv2831<br>Rv3039c Rv3516<br>Rv3550 Rv3774<br>Rv0905 Rv3374<br>Rv3373 Rv0468<br>Rv1715 Rv1912c<br>Rv3141 Rv0243<br>Rv1074c Rv3546<br>Rv3556c Rv1323<br>Rv0859 | Beta oxidation of fatty acids |
|          |                                                                                                                                                                                      |                                                                                           |                                                                                                                                                                                                                                                                                                                                                                                                                                                                                                                                                                                                                           | <i>Continued on next page</i> |

Table 4 – continued from previous page

| Reaction | Description                                                                                                                                                                          | Formula                                                                             | Genes                                                                                                                                                                                                                                                                                                                                                                                                                                                                                                                                                                                                                     | Pathways                      |
|----------|--------------------------------------------------------------------------------------------------------------------------------------------------------------------------------------|-------------------------------------------------------------------------------------|---------------------------------------------------------------------------------------------------------------------------------------------------------------------------------------------------------------------------------------------------------------------------------------------------------------------------------------------------------------------------------------------------------------------------------------------------------------------------------------------------------------------------------------------------------------------------------------------------------------------------|-------------------------------|
| FAD-11   | acyl-CoA dehydrogenase<br>fadE1-36 AND<br>enoyl-CoA hydratase/isomerase<br>echA1-21 AND 3-hydroxyacyl-CoA dehydrogenase<br>fadB2-5 AND<br>acetyl-CoA C-acetyltransferase<br>fadA2-16 | occoa[c] + fad[c] + nad[c] + coa[c] -><br>hexcoa[c] + fadh2[c] + nadh[c] + accoa[c] | Rv0131c Rv0154c<br>Rv0215c Rv0231<br>Rv0244c Rv0271c<br>Rv0400c Rv0752c<br>Rv0873 Rv0972c<br>Rv0975c Rv1346<br>Rv1467c Rv1679<br>Rv1933c Rv1934c<br>Rv2724c Rv2789c<br>Rv3061c Rv3139<br>Rv3140 Rv3274c<br>Rv3504 Rv3505<br>Rv3543c Rv3544c<br>Rv3560c Rv3562<br>Rv3563 Rv3564<br>Rv3573c Rv3761c<br>Rv3797 Rv0672<br>Rv2500c Rv0222<br>Rv0456c Rv0632c<br>Rv0673 Rv0675<br>Rv0971c Rv1070c<br>Rv1071c Rv1141c<br>Rv1142c Rv1472<br>Rv1935c Rv2486<br>Rv2679 Rv2831<br>Rv3039c Rv3516<br>Rv3550 Rv3774<br>Rv0905 Rv3374<br>Rv3373 Rv0468<br>Rv1715 Rv1912c<br>Rv3141 Rv0243<br>Rv1074c Rv3546<br>Rv3556c Rv1323<br>Rv0859 | Beta oxidation of fatty acids |
|          |                                                                                                                                                                                      |                                                                                     |                                                                                                                                                                                                                                                                                                                                                                                                                                                                                                                                                                                                                           | <i>Continued on next page</i> |

Table 4 – continued from previous page

| Reaction | Description                                                                                                                                                                                     | Formula                                                                                      | Genes                                                                                                                                                                                                                                                                                                                                                                                                                                                                                                                                                                                                                     | Pathways                                        |
|----------|-------------------------------------------------------------------------------------------------------------------------------------------------------------------------------------------------|----------------------------------------------------------------------------------------------|---------------------------------------------------------------------------------------------------------------------------------------------------------------------------------------------------------------------------------------------------------------------------------------------------------------------------------------------------------------------------------------------------------------------------------------------------------------------------------------------------------------------------------------------------------------------------------------------------------------------------|-------------------------------------------------|
| FAD-15   | acyl-CoA dehydrogenase<br>fadE1-36 AND<br>enoyl-CoA hydratase/isomerase<br>echA1-21 AND 3-<br>hydroxyacyl-CoA<br>dehydrogenase<br>fadB2-5 AND<br>acetyl-CoA C-<br>acetyltransferase<br>fadA2-20 | hdcoa[c] + fad[c] +<br>nad[c] + coa[c] -><br>c5tetdcoa[c] + fadh2[c]<br>+ nadh[c] + accoa[c] | Rv0131c Rv0154c<br>Rv0215c Rv0231<br>Rv0244c Rv0271c<br>Rv0400c Rv0752c<br>Rv0873 Rv0972c<br>Rv0975c Rv1346<br>Rv1467c Rv1679<br>Rv1933c Rv1934c<br>Rv2724c Rv2789c<br>Rv3061c Rv3139<br>Rv3140 Rv3274c<br>Rv3504 Rv3505<br>Rv3543c Rv3544c<br>Rv3560c Rv3562<br>Rv3563 Rv3564<br>Rv3573c Rv3761c<br>Rv3797 Rv0672<br>Rv2500c Rv0222<br>Rv0456c Rv0632c<br>Rv0673 Rv0675<br>Rv0971c Rv1070c<br>Rv1071c Rv1141c<br>Rv1142c Rv1472<br>Rv1935c Rv2486<br>Rv2679 Rv2831<br>Rv3039c Rv3516<br>Rv3550 Rv3774<br>Rv0905 Rv3374<br>Rv3373 Rv0468<br>Rv1715 Rv1912c<br>Rv3141 Rv0243<br>Rv1074c Rv3546<br>Rv3556c Rv1323<br>Rv0859 | Beta oxidation of<br>unsaturated fatty<br>acids |
|          |                                                                                                                                                                                                 |                                                                                              |                                                                                                                                                                                                                                                                                                                                                                                                                                                                                                                                                                                                                           | <i>Continued on next page</i>                   |



Table 4 – continued from previous page

| Reaction | Description                                                                                                                                                                          | Formula                                                                                         | Genes                                                                                                                                                                                                                                                                                                                                                                                                                                                                                                                                                                                                                     | Pathways                                  |
|----------|--------------------------------------------------------------------------------------------------------------------------------------------------------------------------------------|-------------------------------------------------------------------------------------------------|---------------------------------------------------------------------------------------------------------------------------------------------------------------------------------------------------------------------------------------------------------------------------------------------------------------------------------------------------------------------------------------------------------------------------------------------------------------------------------------------------------------------------------------------------------------------------------------------------------------------------|-------------------------------------------|
| FAD-16   | acyl-CoA dehydrogenase<br>fadE1-36 AND<br>enoyl-CoA hydratase/isomerase<br>echA1-21 AND 3-hydroxyacyl-CoA dehydrogenase<br>fadB2-5 AND<br>acetyl-CoA C-acetyltransferase<br>fadA2-21 | c5tetdcoa[c] + fad[c]<br>+ nad[c] + coa[c] -><br>c3dodcoa[c] + fadh2[c]<br>+ nadh[c] + accoa[c] | Rv0131c Rv0154c<br>Rv0215c Rv0231<br>Rv0244c Rv0271c<br>Rv0400c Rv0752c<br>Rv0873 Rv0972c<br>Rv0975c Rv1346<br>Rv1467c Rv1679<br>Rv1933c Rv1934c<br>Rv2724c Rv2789c<br>Rv3061c Rv3139<br>Rv3140 Rv3274c<br>Rv3504 Rv3505<br>Rv3543c Rv3544c<br>Rv3560c Rv3562<br>Rv3563 Rv3564<br>Rv3573c Rv3761c<br>Rv3797 Rv0672<br>Rv2500c Rv0222<br>Rv0456c Rv0632c<br>Rv0673 Rv0675<br>Rv0971c Rv1070c<br>Rv1071c Rv1141c<br>Rv1142c Rv1472<br>Rv1935c Rv2486<br>Rv2679 Rv2831<br>Rv3039c Rv3516<br>Rv3550 Rv3774<br>Rv0905 Rv3374<br>Rv3373 Rv0468<br>Rv1715 Rv1912c<br>Rv3141 Rv0243<br>Rv1074c Rv3546<br>Rv3556c Rv1323<br>Rv0859 | Beta oxidation of unsaturated fatty acids |

*Continued on next page*

Table 4 – continued from previous page

| Reaction | Description                                                                                                                                                                          | Formula                       | Genes                                                                                                                                                                                                                                                                                                                                                                                                                                                                                                                                                                                                                     | Pathways                                  |
|----------|--------------------------------------------------------------------------------------------------------------------------------------------------------------------------------------|-------------------------------|---------------------------------------------------------------------------------------------------------------------------------------------------------------------------------------------------------------------------------------------------------------------------------------------------------------------------------------------------------------------------------------------------------------------------------------------------------------------------------------------------------------------------------------------------------------------------------------------------------------------------|-------------------------------------------|
| FAD-17   | acyl-CoA dehydrogenase<br>fadE1-36 AND<br>enoyl-CoA hydratase/isomerase<br>echA1-21 AND 3-hydroxyacyl-CoA dehydrogenase<br>fadB2-5 AND<br>acetyl-CoA C-acetyltransferase<br>fadA2-22 | c3dodcoa[c] -><br>t2dodcoa[c] | Rv0131c Rv0154c<br>Rv0215c Rv0231<br>Rv0244c Rv0271c<br>Rv0400c Rv0752c<br>Rv0873 Rv0972c<br>Rv0975c Rv1346<br>Rv1467c Rv1679<br>Rv1933c Rv1934c<br>Rv2724c Rv2789c<br>Rv3061c Rv3139<br>Rv3140 Rv3274c<br>Rv3504 Rv3505<br>Rv3543c Rv3544c<br>Rv3560c Rv3562<br>Rv3563 Rv3564<br>Rv3573c Rv3761c<br>Rv3797 Rv0672<br>Rv2500c Rv0222<br>Rv0456c Rv0632c<br>Rv0673 Rv0675<br>Rv0971c Rv1070c<br>Rv1071c Rv1141c<br>Rv1142c Rv1472<br>Rv1935c Rv2486<br>Rv2679 Rv2831<br>Rv3039c Rv3516<br>Rv3550 Rv3774<br>Rv0905 Rv3374<br>Rv3373 Rv0468<br>Rv1715 Rv1912c<br>Rv3141 Rv0243<br>Rv1074c Rv3546<br>Rv3556c Rv1323<br>Rv0859 | Beta oxidation of unsaturated fatty acids |
|          |                                                                                                                                                                                      |                               |                                                                                                                                                                                                                                                                                                                                                                                                                                                                                                                                                                                                                           | <i>Continued on next page</i>             |

Table 4 – continued from previous page

| Reaction | Description                                                                                                                                                                          | Formula                                                   | Genes                                                                                                                                                                                                                                                                                                                                                                                                                                                                                                                                                                                                                     | Pathways                                        |
|----------|--------------------------------------------------------------------------------------------------------------------------------------------------------------------------------------|-----------------------------------------------------------|---------------------------------------------------------------------------------------------------------------------------------------------------------------------------------------------------------------------------------------------------------------------------------------------------------------------------------------------------------------------------------------------------------------------------------------------------------------------------------------------------------------------------------------------------------------------------------------------------------------------------|-------------------------------------------------|
| FAD-19   | acyl-CoA dehydrogenase<br>fadE1-36 AND<br>enoyl-CoA hydratase/isomerase<br>echA1-21 AND 3-hydroxyacyl-CoA dehydrogenase<br>fadB2-5 AND<br>acetyl-CoA C-acetyltransferase<br>fadA2-24 | d2hdodcoa[c] + nad[c] -<br>> dodcoa[c] + nadh[c]          | Rv0131c Rv0154c<br>Rv0215c Rv0231<br>Rv0244c Rv0271c<br>Rv0400c Rv0752c<br>Rv0873 Rv0972c<br>Rv0975c Rv1346<br>Rv1467c Rv1679<br>Rv1933c Rv1934c<br>Rv2724c Rv2789c<br>Rv3061c Rv3139<br>Rv3140 Rv3274c<br>Rv3504 Rv3505<br>Rv3543c Rv3544c<br>Rv3560c Rv3562<br>Rv3563 Rv3564<br>Rv3573c Rv3761c<br>Rv3797 Rv0672<br>Rv2500c Rv0222<br>Rv0456c Rv0632c<br>Rv0673 Rv0675<br>Rv0971c Rv1070c<br>Rv1071c Rv1141c<br>Rv1142c Rv1472<br>Rv1935c Rv2486<br>Rv2679 Rv2831<br>Rv3039c Rv3516<br>Rv3550 Rv3774<br>Rv0905 Rv3374<br>Rv3373 Rv0468<br>Rv1715 Rv1912c<br>Rv3141 Rv0243<br>Rv1074c Rv3546<br>Rv3556c Rv1323<br>Rv0859 | Beta oxidation of<br>unsaturated fatty<br>acids |
| ALDR     | Aldolase reductase                                                                                                                                                                   | arab-D[c] + nadph[c]<br>+ h[c] -> arabl-D[c] +<br>nadp[c] |                                                                                                                                                                                                                                                                                                                                                                                                                                                                                                                                                                                                                           | Arabinogalactan<br>Synthesis                    |
| AL4D     | D-arabinitol 4-dehydrogenase                                                                                                                                                         | arabl-D[c] + nad[c] -><br>xylu-D[c] + nadh[c] +<br>h[c]   | Rv1928c                                                                                                                                                                                                                                                                                                                                                                                                                                                                                                                                                                                                                   | Arabinogalactan<br>Synthesis                    |

## 8 Fig. S4 - Spindle Map Rv3794

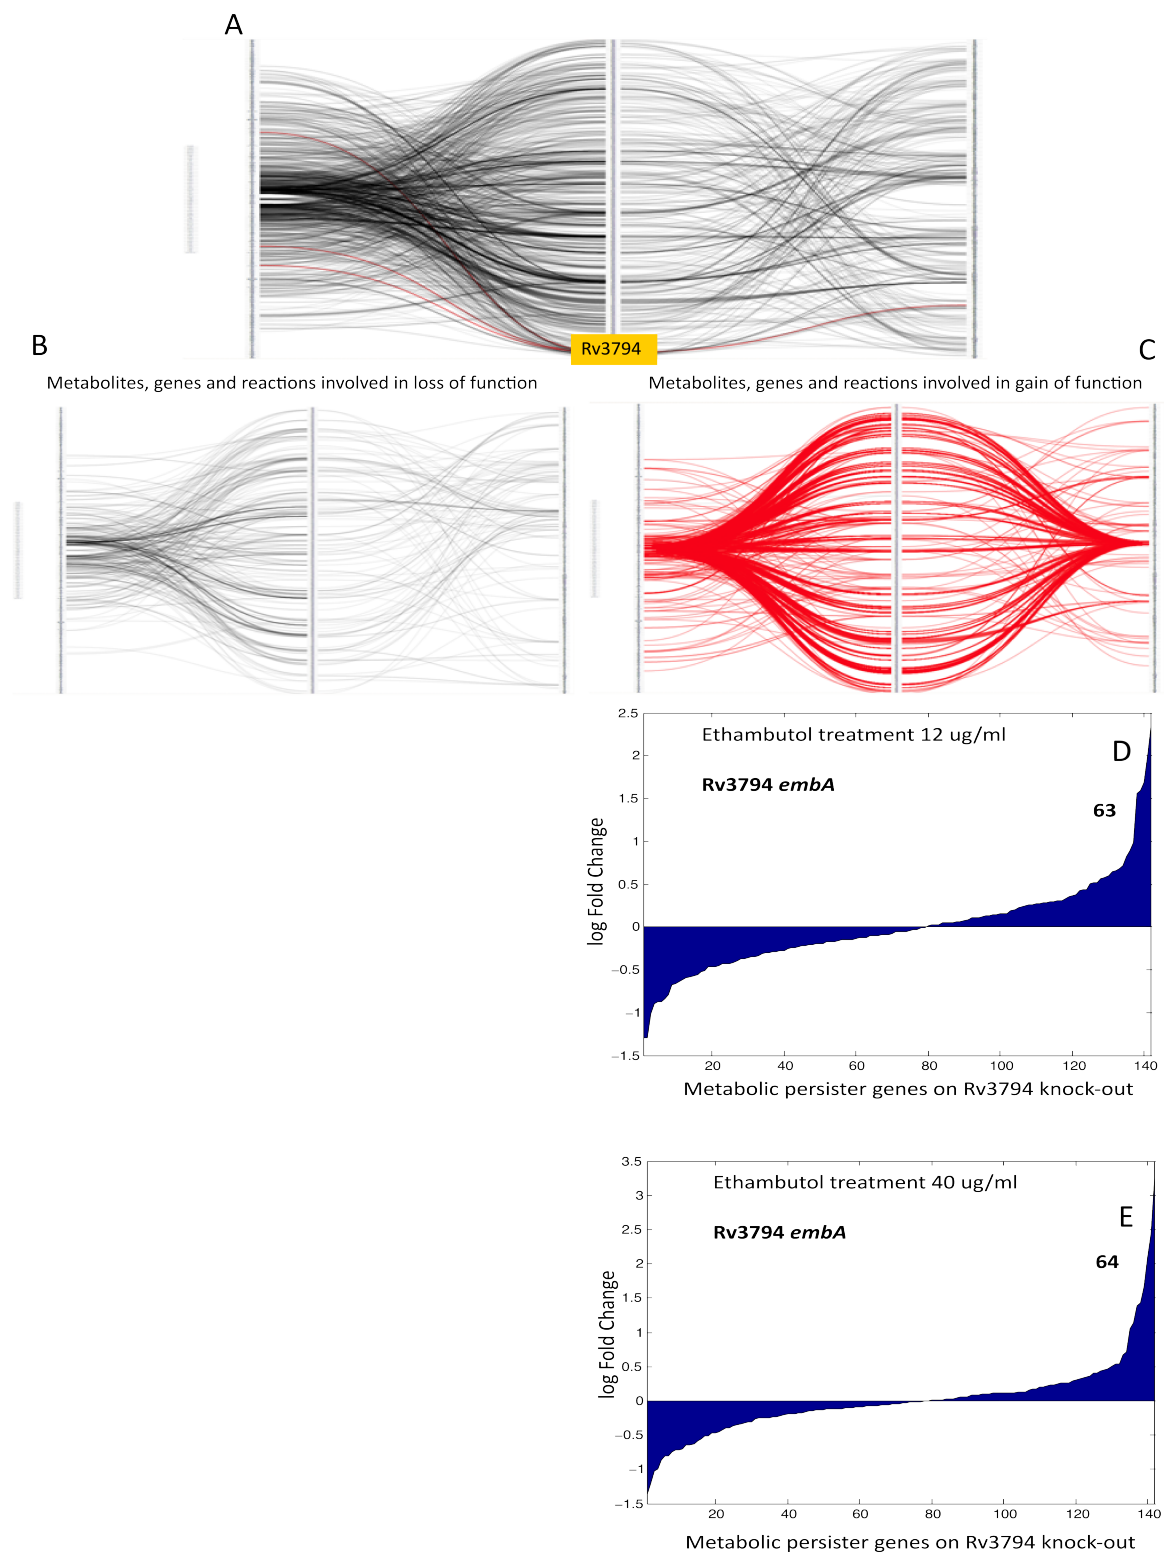

## 9 Table - S19 Metabolic Persister Reactions, Genes and Pathway on Rv3794 Deletion

Table 5: Metabolic persister reactions, gene and pathways on Rv3794 deletion

| Reaction | Description                                                    | Formula                                                                        | Genes              | Pathways                         |
|----------|----------------------------------------------------------------|--------------------------------------------------------------------------------|--------------------|----------------------------------|
| ACKr     | acetate kinase                                                 | $ac[c] + atp[c] \rightarrow actp[c] + adp[c]$                                  | Rv0409             | Pyruvate Metabolism              |
| ADK1     | adenylate kinase                                               | $amp[c] + atp[c] \rightleftharpoons 2 adp[c]$                                  | Rv0733             | Purine Metabolism                |
| ADK2     | adenylate kinase<br>Inorganic triphosphate                     | $amp[c] + pppi[c] \rightleftharpoons adp[c] + ppi[c]$                          | Rv0733             | Purine Metabolism                |
| ADK4     | adenylate kinase<br>ITP                                        | $amp[c] + itp[c] \rightleftharpoons adp[c] + idp[c]$                           | Rv0733             | Nucleotide Sugar Metabolism      |
| ARGt5r   | L arginine transport<br>via diffusion                          | $arg-L[e] \rightleftharpoons arg-L[c]$                                         | Rv2320c            | Transport                        |
| ASPO5    | L aspartate oxidase                                            | $asp-L[c] + fum[c] \rightarrow h[c] + iasp[c] + succ[c]$                       | Rv1595             | Alanine and Aspartate Metabolism |
| AST      | Arginine succinyltransferase                                   | $arg-L[c] + succoa[c] \rightarrow coa[c] + h[c] + sucarg[c]$                   |                    | Arginine and Proline Metabolism  |
| CAT      | catalase                                                       | $2 h_2o_2[c] \rightarrow 2 h_2o[c] + o_2[c]$                                   | Rv1908c            | Redox Metabolism                 |
| CO2t     | CO2 transporter via<br>diffusion                               | $co_2[e] \rightleftharpoons co_2[c]$                                           |                    | Transport                        |
| CODH2r   | carbon monoxide<br>dehydrogenase<br>acetyl CoA syn-<br>thase 2 | $co[c] + 2 fdox[c] + h_2o[c] \rightleftharpoons co_2[c] + 2 fdred[c] + 2 h[c]$ | Rv0373c<br>Rv0375c | Rv0374c<br>Redox Metabolism      |
| CODH3    | carbon monoxide<br>dehydrogenase<br>acetyl CoA syn-<br>thase 2 | $adfdOX[c] + 2 co[c] + 2 h_2o[c] \rightarrow adfdRD[c] + 2 co_2[c] + 2 h[c]$   | Rv0373c<br>Rv0375c | Rv0374c<br>Redox Metabolism      |
| DCTPD2   | dCTP deaminase                                                 | $ctp[c] + h_2o[c] + h[c] \rightarrow nh_4[c] + utp[c]$                         | Rv0321             | Pyrimidine Metabolism            |
| DHORD2   | dihydroorotic acid<br>dehydrogenase<br>quinone8                | $dhor-S[c] + q_8[c] \rightarrow orot[c] + q_8h_2[c]$                           | Rv2139             | Pyrimidine Metabolism            |
| DHORD3   | dihydroorotic acid<br>dehydrogenase<br>menaquinone 6           | $dhor-S[c] + mqn_6[c] \rightleftharpoons mql_6[c] + orot[c]$                   | Rv2139             | Pyrimidine Metabolism            |
| ECHH-0   | Ech hydrogenase no<br>electron transport                       | $2 fdox[c] + h_2[c] \rightleftharpoons 2 fdred[c] + 2 h[c]$                    |                    | Miscellaneous                    |

*Continued on next page*

Table 5 – continued from previous page

| Reaction    | Description                                        | Formula                                                                                                                         | Genes                                       | Pathways                  |
|-------------|----------------------------------------------------|---------------------------------------------------------------------------------------------------------------------------------|---------------------------------------------|---------------------------|
| ETHAt       | ethanolamine transport via diffusion extracellular | etha[e] <=> etha[c]                                                                                                             |                                             | Transport                 |
| EX-arg-L(e) | L Arginine exchange                                | arg-L[e] <=>                                                                                                                    |                                             | Exchange                  |
| EX-etha(e)  | Ethanolamine exchange                              | etha[e] <=>                                                                                                                     |                                             | Exchange                  |
| EX-gly(e)   | Glycine exchange                                   | gly[e] <=>                                                                                                                      |                                             | Exchange                  |
| EX-k(e)     | K exchange                                         | k[e] <=>                                                                                                                        |                                             | Exchange                  |
| EX-mal-L(e) | L Malate exchange                                  | mal-L[e] <=>                                                                                                                    |                                             | Exchange                  |
| EX-na1(e)   | Sodium exchange                                    | na1[e] <=>                                                                                                                      |                                             | Exchange                  |
| EX-ser-L(e) | L Serine exchange                                  | ser-L[e] <=>                                                                                                                    |                                             | Exchange                  |
| FACOAL140   | fatty acid CoA ligase tetradecanoate               | atp[c] + coa[c] + ttdca[c] <=> amp[c] + ppi[c] + tdcoa[c]                                                                       | Rv1529 Rv3826                               | Fatty Acid Metabolism     |
| FACOAL161   | fatty acid CoA ligase hexadecenoate                | atp[c] + coa[c] + hdcea[c] <=> amp[c] + hdcoa[c] + ppi[c]                                                                       | Rv1529 Rv3826                               | Fatty Acid Metabolism     |
| FAO1        | Fatty acid oxidation tetradecanoate                | atp[c] + 7 coa[c] + 6 fad[c] + 6 h2o[c] + 6 nad[c] + ttdca[c] -> 7 accoa[c] + amp[c] + 6 fadh2[c] + 6 h[c] + 6 nadh[c] + ppi[c] | Rv0468 Rv0859 Rv0860 Rv1144 Rv1323          | Fatty Acid Metabolism     |
| FORMCOAL    | formyl coa CoA ligase                              | atp[c] + coa[c] + for[c] <=> amp[c] + forcoa[c] + ppi[c]                                                                        |                                             | Redox Metabolism          |
| FRD         | fumarate reductase                                 | fadh2[c] + fum[c] -> fad[c] + succ[c]                                                                                           | Rv1552 Rv1553 Rv1554 Rv1555                 | Citric Acid Cycle         |
| FRD2        | fumarate reductase                                 | fum[c] + mql8[c] -> mqn8[c] + succ[c]                                                                                           | Rv0247c Rv0248c Rv3316 Rv3317 Rv3318 Rv3319 | Citric Acid Cycle         |
| FRD5        | fumarate reductase                                 | fum[c] + mql6[c] <=> mqn6[c] + succ[c]                                                                                          | Rv1552 Rv1553 Rv1554 Rv1555                 | Citric Acid Cycle         |
| G3PAT160    | glycerol 3 phosphate acyltransferase C160          | glyc3p[c] + palmACP[c] -> 1hdecg3p[c] + ACP[c]                                                                                  | Rv1551                                      | Fatty Acid Metabolism     |
| G6PDH2      | glucose 6 phosphate dehydrogenase                  | g6p[c] + nadp[c] -> 6pgl[c] + 3 h[c] + nadph[c]                                                                                 | Rv1121 Rv1447c                              | Pentose Phosphate Pathway |
| GLYt2r      | glycine reversible transport via proton symport    | gly[e] + h[e] <=> gly[c] + h[c]                                                                                                 | Rv1704c                                     | Transport                 |

*Continued on next page*

Table 5 – continued from previous page

| Reaction     | Description                                                   | Formula                                                                            | Genes                                                                                                                         | Pathways                                |
|--------------|---------------------------------------------------------------|------------------------------------------------------------------------------------|-------------------------------------------------------------------------------------------------------------------------------|-----------------------------------------|
| GPDDA2       | Glycerophosphodiesterase<br>Glycerophospho-ethanolamine       | g3pe[c] + h2o[c] -> etha[c] + glyc3p[c] + h[c]                                     | Rv0317c Rv2277c<br>Rv3842c                                                                                                    | Fatty Acid Metabolism                   |
| GTHOr        | glutathione oxidoreductase                                    | gthox[c] + h[c] + nadph[c] <=> 2 gthrd[c] + nadp[c]                                | Rv2855                                                                                                                        | Glutamate Metabolism                    |
| GTPDPK       | GTP diphosphokinase                                           | atp[c] + gtp[c] -> amp[c] + gdptp[c] + h[c]                                        | Rv2583c                                                                                                                       | Purine Metabolism                       |
| HSDy         | homoserine dehydrogenase NADPH                                | hom-L[c] + nadp[c] <=> aspsa[c] + h[c] + nadph[c]                                  | Rv1294                                                                                                                        | Glycine Serine and Threonine Metabolism |
| Kt3r         | potassium proton antiporter                                   | h[e] + k[c] <=> h[c] + k[e]                                                        | Rv2691 Rv2692                                                                                                                 | Transport                               |
| LPLIPAL2E160 | Lysophospholipase L2 2 acylglycerophospho-ethanolamine n C160 | 2agpe160[c] + h2o[c] -> g3pe[c] + h[c] + hdca[c]                                   | Rv0183                                                                                                                        | Fatty Acid Metabolism                   |
| L-LACD2      | L Lactate dehydrogenase ubiquinone                            | lac-L[c] + q8[c] -> pyr[c] + q8h2[c]                                               | Rv1872c                                                                                                                       | Pyruvate Metabolism                     |
| MALt2r       | L malate reversible transport via proton symport              | h[e] + mal-L[e] <=> h[c] + mal-L[c]                                                | Rv2443                                                                                                                        | Transport                               |
| ME1          | malic enzyme NAD                                              | mal-L[c] + nad[c] -> co2[c] + nadh[c] + pyr[c]                                     | Rv2332                                                                                                                        | Pyruvate Metabolism                     |
| MYCTR        | mycothiol reductase nadp dependent                            | 2 msh[c] + nadp[c] <=> h[c] + mssg[c] + nadph[c]                                   | Rv2855                                                                                                                        | Redox Metabolism                        |
| MYCTR2       | mycothiol reductase glutathione exchange                      | gthox[c] + 2 msh[c] <=> 2 gthrd[c] + mssg[c]                                       | Rv2855                                                                                                                        | Redox Metabolism                        |
| NADH2r       | NADH dehydrogenase                                            | h[c] + nadh[c] + q[c] <=> nad[c] + qh2[c]                                          | Rv0082 Rv3145<br>Rv3146 Rv3147<br>Rv3148 Rv3149<br>Rv3150 Rv3151<br>Rv3152 Rv3153<br>Rv3154 Rv3155<br>Rv3156 Rv3157<br>Rv3158 | Redox Metabolism                        |
| NADS2        | NAD synthase glutamine hydrolysing                            | atp[c] + dnad[c] + gln-L[c] + h2o[c] -> amp[c] + glu-L[c] + h[c] + nad[c] + ppi[c] | Rv2438c                                                                                                                       | Glutamate Metabolism                    |

*Continued on next page*

Table 5 – continued from previous page

| Reaction   | Description                                                  | Formula                                                               | Genes         | Pathways                        |
|------------|--------------------------------------------------------------|-----------------------------------------------------------------------|---------------|---------------------------------|
| NAKtr      | potassium sodium antiporter                                  | $k[c] + na1[e] \rightleftharpoons k[e] + na1[c]$                      | Rv3236c       | Transport                       |
| NAt3-1     | sodium proton antiporter HNA is 11                           | $h[e] + na1[c] \rightleftharpoons h[c] + na1[e]$                      | Rv2287        | Transport                       |
| NDPK9      | nucleoside diphosphate kinase ATPIDP                         | $atp[c] + idp[c] \rightleftharpoons adp[c] + itp[c]$                  | Rv2445c       | Pyrimidine Metabolism           |
| NNAT       | nicotinate nucleotide adenylyl-transferase                   | $atp[c] + h[c] + nicrnt[c] \rightarrow dnad[c] + ppi[c]$              | Rv2421c       | Pantothenate and CoA Metabolism |
| NNDPR      | nicotinate nucleotide diphosphorylase carboxylating          | $2 h[c] + prpp[c] + quln[c] \rightarrow co2[c] + nicrnt[c] + ppi[c]$  | Rv1596        | Pantothenate and CoA Metabolism |
| ORNt       | ornithine transport via diffusion extracellular to periplasm | $orn[e] \rightleftharpoons orn[c]$                                    | Rv2320c       | Transport                       |
| OXGDC      | 2 oxoglutarate decarboxylase                                 | $akg[c] + h[c] \rightarrow co2[c] + succal[c]$                        | Rv1248c       | Citric Acid Cycle               |
| PGL        | 6 phosphogluconolactonase                                    | $6pgl[c] + h2o[c] \rightarrow 6pgc[c] + h[c]$                         | Rv1445c       | Pentose Phosphate Pathway       |
| PHTO       | phthicol oxygenase                                           | $2 o2[c] + phthclh2[c] \rightarrow 2 h[c] + 2 o2s[c] + phthcl[c]$     |               | Ubiquinone Metabolism           |
| PLIPA1E160 | Phospholipase A1 phosphatidylethanolamine C160               | $h2o[c] + pe160[c] \rightarrow 2agpe160[c] + h[c] + hdca[c]$          |               | Fatty Acid Metabolism           |
| PPDK       | Pyruvate phosphate dikinase                                  | $atp[c] + pi[c] + pyr[c] \rightarrow amp[c] + h[c] + pep[c] + ppi[c]$ | Rv1127c       | Pyruvate Metabolism             |
| PPK2       | polyphosphate kinase                                         | $atp[c] + ppi[c] \rightarrow adp[c] + pppi[c]$                        | Rv2984        | Purine Metabolism               |
| PTAr       | phosphotransacetylase                                        | $accoa[c] + pi[c] \rightleftharpoons actp[c] + coa[c]$                | Rv0408 Rv3914 | Pyruvate Metabolism             |
| QRr        | Quinone reductase                                            | $h[c] + nadph[c] + q[c] \rightleftharpoons nadp[c] + qh2[c]$          | Rv3777        | Redox Metabolism                |
| QULNS      | quinolinate synthase                                         | $dhap[c] + iasp[c] \rightarrow 2 h2o[c] + pi[c] + quln[c]$            | Rv1594        | Pantothenate and CoA Metabolism |
| SERt2r     | L serine reversible transport via proton symport             | $h[e] + ser-L[e] \rightleftharpoons h[c] + ser-L[c]$                  | Rv1704c       | Transport                       |
| SGDS       | Succinylglutamate desuccinylase                              | $h2o[c] + sucglu[c] \rightarrow glu-L[c] + succ[c]$                   |               | Arginine and Proline Metabolism |

Continued on next page



Table 5 – continued from previous page

| Reaction | Description                                 | Formula                                                                  | Genes                    | Pathways                        |
|----------|---------------------------------------------|--------------------------------------------------------------------------|--------------------------|---------------------------------|
| SGSAD    | Succinylglutamic semialdehyde dehydrogenase | $h_2o[c] + nad[c] + sucgsa[c] \rightarrow 2 h[c] + nadh[c] + sucglu[c]$  |                          | Arginine and Proline Metabolism |
| SOTA     | Succinylornithine transaminase              | $akg[c] + sucorn[c] \rightarrow glu-L[c] + sucgsa[c]$                    |                          | Arginine and Proline Metabolism |
| SPODM    | superoxide dismutase                        | $2 h[c] + 2 o_2s[c] \rightarrow h_2o_2[c] + o_2[c]$                      | Rv0432 Rv1908c<br>Rv3846 | Cofactor Metabolism             |
| SSALy    | succinate semialdehyde dehydrogenase NADP   | $h_2o[c] + nadp[c] + succsal[c] \rightarrow 2 h[c] + nadph[c] + succ[c]$ | Rv0234c Rv1731           | Glutamate Metabolism            |
| XYLK     | xylulokinase                                | $atp[c] + xylu-D[c] \rightarrow adp[c] + h[c] + xu5p-D[c]$               | Rv0729                   | Sugar Metabolism                |
| PPGPP    | PPGPP-3-pyrophosphohydrolase                | $gdpdp[c] + h_2o[c] \rightarrow gdp[c] + ppi[c]$                         |                          | Purine Metabolism               |

*Continued on next page*

Table 5 – continued from previous page

| Reaction | Description                                                                                                                                                                          | Formula                                                                          | Genes                                                                                                                                                                                                                                                                                                                                                                                                                                                                                                                                                                                                                     | Pathways                      |
|----------|--------------------------------------------------------------------------------------------------------------------------------------------------------------------------------------|----------------------------------------------------------------------------------|---------------------------------------------------------------------------------------------------------------------------------------------------------------------------------------------------------------------------------------------------------------------------------------------------------------------------------------------------------------------------------------------------------------------------------------------------------------------------------------------------------------------------------------------------------------------------------------------------------------------------|-------------------------------|
| FAD-8    | acyl-CoA dehydrogenase<br>fadE1-36 AND<br>enoyl-CoA hydratase/isomerase<br>echA1-21 AND 3-hydroxyacyl-CoA dehydrogenase<br>fadB2-5 AND<br>acetyl-CoA C-acetyltransferase<br>fadA2-13 | tdcoa[c] + fad[c] + nad[c] + coa[c] -> dodcoa[c] + fadh2[c] + nadh[c] + accoa[c] | Rv0131c Rv0154c<br>Rv0215c Rv0231<br>Rv0244c Rv0271c<br>Rv0400c Rv0752c<br>Rv0873 Rv0972c<br>Rv0975c Rv1346<br>Rv1467c Rv1679<br>Rv1933c Rv1934c<br>Rv2724c Rv2789c<br>Rv3061c Rv3139<br>Rv3140 Rv3274c<br>Rv3504 Rv3505<br>Rv3543c Rv3544c<br>Rv3560c Rv3562<br>Rv3563 Rv3564<br>Rv3573c Rv3761c<br>Rv3797 Rv0672<br>Rv2500c Rv0222<br>Rv0456c Rv0632c<br>Rv0673 Rv0675<br>Rv0971c Rv1070c<br>Rv1071c Rv1141c<br>Rv1142c Rv1472<br>Rv1935c Rv2486<br>Rv2679 Rv2831<br>Rv3039c Rv3516<br>Rv3550 Rv3774<br>Rv0905 Rv3374<br>Rv3373 Rv0468<br>Rv1715 Rv1912c<br>Rv3141 Rv0243<br>Rv1074c Rv3546<br>Rv3556c Rv1323<br>Rv0859 | Beta oxidation of fatty acids |
|          |                                                                                                                                                                                      |                                                                                  |                                                                                                                                                                                                                                                                                                                                                                                                                                                                                                                                                                                                                           | <i>Continued on next page</i> |

Table 5 – continued from previous page

| Reaction | Description                                                                                                                                                                          | Formula                                                                                   | Genes                                                                                                                                                                                                                                                                                                                                                                                                                                                                                                                                                                                                                     | Pathways                      |
|----------|--------------------------------------------------------------------------------------------------------------------------------------------------------------------------------------|-------------------------------------------------------------------------------------------|---------------------------------------------------------------------------------------------------------------------------------------------------------------------------------------------------------------------------------------------------------------------------------------------------------------------------------------------------------------------------------------------------------------------------------------------------------------------------------------------------------------------------------------------------------------------------------------------------------------------------|-------------------------------|
| FAD-9    | acyl-CoA dehydrogenase<br>fadE1-36 AND<br>enoyl-CoA hydratase/isomerase<br>echA1-21 AND 3-hydroxyacyl-CoA dehydrogenase<br>fadB2-5 AND<br>acetyl-CoA C-acetyltransferase<br>fadA2-14 | dodcoa[c] + fad[c]<br>+ nad[c] + coa[c] -><br>decoa[c] + fadh2[c] +<br>nadh[c] + accoa[c] | Rv0131c Rv0154c<br>Rv0215c Rv0231<br>Rv0244c Rv0271c<br>Rv0400c Rv0752c<br>Rv0873 Rv0972c<br>Rv0975c Rv1346<br>Rv1467c Rv1679<br>Rv1933c Rv1934c<br>Rv2724c Rv2789c<br>Rv3061c Rv3139<br>Rv3140 Rv3274c<br>Rv3504 Rv3505<br>Rv3543c Rv3544c<br>Rv3560c Rv3562<br>Rv3563 Rv3564<br>Rv3573c Rv3761c<br>Rv3797 Rv0672<br>Rv2500c Rv0222<br>Rv0456c Rv0632c<br>Rv0673 Rv0675<br>Rv0971c Rv1070c<br>Rv1071c Rv1141c<br>Rv1142c Rv1472<br>Rv1935c Rv2486<br>Rv2679 Rv2831<br>Rv3039c Rv3516<br>Rv3550 Rv3774<br>Rv0905 Rv3374<br>Rv3373 Rv0468<br>Rv1715 Rv1912c<br>Rv3141 Rv0243<br>Rv1074c Rv3546<br>Rv3556c Rv1323<br>Rv0859 | Beta oxidation of fatty acids |
|          |                                                                                                                                                                                      |                                                                                           |                                                                                                                                                                                                                                                                                                                                                                                                                                                                                                                                                                                                                           | <i>Continued on next page</i> |

Table 5 – continued from previous page

| Reaction | Description                                                                                                                                                                          | Formula                                                                             | Genes                                                                                                                                                                                                                                                                                                                                                                                                                                                                                                                                                                                                                     | Pathways                      |
|----------|--------------------------------------------------------------------------------------------------------------------------------------------------------------------------------------|-------------------------------------------------------------------------------------|---------------------------------------------------------------------------------------------------------------------------------------------------------------------------------------------------------------------------------------------------------------------------------------------------------------------------------------------------------------------------------------------------------------------------------------------------------------------------------------------------------------------------------------------------------------------------------------------------------------------------|-------------------------------|
| FAD-11   | acyl-CoA dehydrogenase<br>fadE1-36 AND<br>enoyl-CoA hydratase/isomerase<br>echA1-21 AND 3-hydroxyacyl-CoA dehydrogenase<br>fadB2-5 AND<br>acetyl-CoA C-acetyltransferase<br>fadA2-16 | occoa[c] + fad[c] + nad[c] + coa[c] -><br>hexcoa[c] + fadh2[c] + nadh[c] + accoa[c] | Rv0131c Rv0154c<br>Rv0215c Rv0231<br>Rv0244c Rv0271c<br>Rv0400c Rv0752c<br>Rv0873 Rv0972c<br>Rv0975c Rv1346<br>Rv1467c Rv1679<br>Rv1933c Rv1934c<br>Rv2724c Rv2789c<br>Rv3061c Rv3139<br>Rv3140 Rv3274c<br>Rv3504 Rv3505<br>Rv3543c Rv3544c<br>Rv3560c Rv3562<br>Rv3563 Rv3564<br>Rv3573c Rv3761c<br>Rv3797 Rv0672<br>Rv2500c Rv0222<br>Rv0456c Rv0632c<br>Rv0673 Rv0675<br>Rv0971c Rv1070c<br>Rv1071c Rv1141c<br>Rv1142c Rv1472<br>Rv1935c Rv2486<br>Rv2679 Rv2831<br>Rv3039c Rv3516<br>Rv3550 Rv3774<br>Rv0905 Rv3374<br>Rv3373 Rv0468<br>Rv1715 Rv1912c<br>Rv3141 Rv0243<br>Rv1074c Rv3546<br>Rv3556c Rv1323<br>Rv0859 | Beta oxidation of fatty acids |
|          |                                                                                                                                                                                      |                                                                                     |                                                                                                                                                                                                                                                                                                                                                                                                                                                                                                                                                                                                                           | <i>Continued on next page</i> |

Table 5 – continued from previous page

| Reaction | Description                                                                                                                                                                          | Formula                                                                             | Genes                                                                                                                                                                                                                                                                                                                                                                                                                                                                                                                                                                                                                     | Pathways                                  |
|----------|--------------------------------------------------------------------------------------------------------------------------------------------------------------------------------------|-------------------------------------------------------------------------------------|---------------------------------------------------------------------------------------------------------------------------------------------------------------------------------------------------------------------------------------------------------------------------------------------------------------------------------------------------------------------------------------------------------------------------------------------------------------------------------------------------------------------------------------------------------------------------------------------------------------------------|-------------------------------------------|
| FAD-15   | acyl-CoA dehydrogenase<br>fadE1-36 AND<br>enoyl-CoA hydratase/isomerase<br>echA1-21 AND 3-hydroxyacyl-CoA dehydrogenase<br>fadB2-5 AND<br>acetyl-CoA C-acetyltransferase<br>fadA2-20 | hdcoa[c] + fad[c] + nad[c] + coa[c] -> c5tetdcoa[c] + fadh2[c] + nadh[c] + accoa[c] | Rv0131c Rv0154c<br>Rv0215c Rv0231<br>Rv0244c Rv0271c<br>Rv0400c Rv0752c<br>Rv0873 Rv0972c<br>Rv0975c Rv1346<br>Rv1467c Rv1679<br>Rv1933c Rv1934c<br>Rv2724c Rv2789c<br>Rv3061c Rv3139<br>Rv3140 Rv3274c<br>Rv3504 Rv3505<br>Rv3543c Rv3544c<br>Rv3560c Rv3562<br>Rv3563 Rv3564<br>Rv3573c Rv3761c<br>Rv3797 Rv0672<br>Rv2500c Rv0222<br>Rv0456c Rv0632c<br>Rv0673 Rv0675<br>Rv0971c Rv1070c<br>Rv1071c Rv1141c<br>Rv1142c Rv1472<br>Rv1935c Rv2486<br>Rv2679 Rv2831<br>Rv3039c Rv3516<br>Rv3550 Rv3774<br>Rv0905 Rv3374<br>Rv3373 Rv0468<br>Rv1715 Rv1912c<br>Rv3141 Rv0243<br>Rv1074c Rv3546<br>Rv3556c Rv1323<br>Rv0859 | Beta oxidation of unsaturated fatty acids |
|          |                                                                                                                                                                                      |                                                                                     |                                                                                                                                                                                                                                                                                                                                                                                                                                                                                                                                                                                                                           | <i>Continued on next page</i>             |

Table 5 – continued from previous page

| Reaction | Description                                                                                                                                                                          | Formula                                                                                         | Genes                                                                                                                                                                                                                                                                                                                                                                                                                                                                                                                                                                                                                     | Pathways                                        |
|----------|--------------------------------------------------------------------------------------------------------------------------------------------------------------------------------------|-------------------------------------------------------------------------------------------------|---------------------------------------------------------------------------------------------------------------------------------------------------------------------------------------------------------------------------------------------------------------------------------------------------------------------------------------------------------------------------------------------------------------------------------------------------------------------------------------------------------------------------------------------------------------------------------------------------------------------------|-------------------------------------------------|
| FAD-16   | acyl-CoA dehydrogenase<br>fadE1-36 AND<br>enoyl-CoA hydratase/isomerase<br>echA1-21 AND 3-hydroxyacyl-CoA dehydrogenase<br>fadB2-5 AND<br>acetyl-CoA C-acetyltransferase<br>fadA2-21 | c5tetdcoa[c] + fad[c]<br>+ nad[c] + coa[c] -><br>c3dodcoa[c] + fadh2[c]<br>+ nadh[c] + accoa[c] | Rv0131c Rv0154c<br>Rv0215c Rv0231<br>Rv0244c Rv0271c<br>Rv0400c Rv0752c<br>Rv0873 Rv0972c<br>Rv0975c Rv1346<br>Rv1467c Rv1679<br>Rv1933c Rv1934c<br>Rv2724c Rv2789c<br>Rv3061c Rv3139<br>Rv3140 Rv3274c<br>Rv3504 Rv3505<br>Rv3543c Rv3544c<br>Rv3560c Rv3562<br>Rv3563 Rv3564<br>Rv3573c Rv3761c<br>Rv3797 Rv0672<br>Rv2500c Rv0222<br>Rv0456c Rv0632c<br>Rv0673 Rv0675<br>Rv0971c Rv1070c<br>Rv1071c Rv1141c<br>Rv1142c Rv1472<br>Rv1935c Rv2486<br>Rv2679 Rv2831<br>Rv3039c Rv3516<br>Rv3550 Rv3774<br>Rv0905 Rv3374<br>Rv3373 Rv0468<br>Rv1715 Rv1912c<br>Rv3141 Rv0243<br>Rv1074c Rv3546<br>Rv3556c Rv1323<br>Rv0859 | Beta oxidation of<br>unsaturated fatty<br>acids |
|          |                                                                                                                                                                                      |                                                                                                 |                                                                                                                                                                                                                                                                                                                                                                                                                                                                                                                                                                                                                           | <i>Continued on next page</i>                   |

Table 5 – continued from previous page

| Reaction | Description                                                                                                                                                                          | Formula                       | Genes                                                                                                                                                                                                                                                                                                                                                                                                                                                                                                                                                                                                                     | Pathways                                  |
|----------|--------------------------------------------------------------------------------------------------------------------------------------------------------------------------------------|-------------------------------|---------------------------------------------------------------------------------------------------------------------------------------------------------------------------------------------------------------------------------------------------------------------------------------------------------------------------------------------------------------------------------------------------------------------------------------------------------------------------------------------------------------------------------------------------------------------------------------------------------------------------|-------------------------------------------|
| FAD-17   | acyl-CoA dehydrogenase<br>fadE1-36 AND<br>enoyl-CoA hydratase/isomerase<br>echA1-21 AND 3-hydroxyacyl-CoA dehydrogenase<br>fadB2-5 AND<br>acetyl-CoA C-acetyltransferase<br>fadA2-22 | c3dodcoa[c] -><br>t2dodcoa[c] | Rv0131c Rv0154c<br>Rv0215c Rv0231<br>Rv0244c Rv0271c<br>Rv0400c Rv0752c<br>Rv0873 Rv0972c<br>Rv0975c Rv1346<br>Rv1467c Rv1679<br>Rv1933c Rv1934c<br>Rv2724c Rv2789c<br>Rv3061c Rv3139<br>Rv3140 Rv3274c<br>Rv3504 Rv3505<br>Rv3543c Rv3544c<br>Rv3560c Rv3562<br>Rv3563 Rv3564<br>Rv3573c Rv3761c<br>Rv3797 Rv0672<br>Rv2500c Rv0222<br>Rv0456c Rv0632c<br>Rv0673 Rv0675<br>Rv0971c Rv1070c<br>Rv1071c Rv1141c<br>Rv1142c Rv1472<br>Rv1935c Rv2486<br>Rv2679 Rv2831<br>Rv3039c Rv3516<br>Rv3550 Rv3774<br>Rv0905 Rv3374<br>Rv3373 Rv0468<br>Rv1715 Rv1912c<br>Rv3141 Rv0243<br>Rv1074c Rv3546<br>Rv3556c Rv1323<br>Rv0859 | Beta oxidation of unsaturated fatty acids |
|          |                                                                                                                                                                                      |                               |                                                                                                                                                                                                                                                                                                                                                                                                                                                                                                                                                                                                                           | <i>Continued on next page</i>             |

Table 5 – continued from previous page

| Reaction | Description                                                                                                                                                                                     | Formula                                                   | Genes                                                                                                                                                                                                                                                                                                                                                                                                                                                                                                                                                                                                                     | Pathways                                        |
|----------|-------------------------------------------------------------------------------------------------------------------------------------------------------------------------------------------------|-----------------------------------------------------------|---------------------------------------------------------------------------------------------------------------------------------------------------------------------------------------------------------------------------------------------------------------------------------------------------------------------------------------------------------------------------------------------------------------------------------------------------------------------------------------------------------------------------------------------------------------------------------------------------------------------------|-------------------------------------------------|
| FAD-19   | acyl-CoA dehydrogenase<br>fadE1-36 AND<br>enoyl-CoA hydratase/isomerase<br>echA1-21 AND 3-<br>hydroxyacyl-CoA<br>dehydrogenase<br>fadB2-5 AND<br>acetyl-CoA C-<br>acetyltransferase<br>fadA2-24 | d2hdodcoa[c] + nad[c] -<br>> dodcoa[c] + nadh[c]          | Rv0131c Rv0154c<br>Rv0215c Rv0231<br>Rv0244c Rv0271c<br>Rv0400c Rv0752c<br>Rv0873 Rv0972c<br>Rv0975c Rv1346<br>Rv1467c Rv1679<br>Rv1933c Rv1934c<br>Rv2724c Rv2789c<br>Rv3061c Rv3139<br>Rv3140 Rv3274c<br>Rv3504 Rv3505<br>Rv3543c Rv3544c<br>Rv3560c Rv3562<br>Rv3563 Rv3564<br>Rv3573c Rv3761c<br>Rv3797 Rv0672<br>Rv2500c Rv0222<br>Rv0456c Rv0632c<br>Rv0673 Rv0675<br>Rv0971c Rv1070c<br>Rv1071c Rv1141c<br>Rv1142c Rv1472<br>Rv1935c Rv2486<br>Rv2679 Rv2831<br>Rv3039c Rv3516<br>Rv3550 Rv3774<br>Rv0905 Rv3374<br>Rv3373 Rv0468<br>Rv1715 Rv1912c<br>Rv3141 Rv0243<br>Rv1074c Rv3546<br>Rv3556c Rv1323<br>Rv0859 | Beta oxidation of<br>unsaturated fatty<br>acids |
| ALDR     | Aldolase reductase                                                                                                                                                                              | arab-D[c] + nadph[c]<br>+ h[c] -> arabl-D[c] +<br>nadp[c] |                                                                                                                                                                                                                                                                                                                                                                                                                                                                                                                                                                                                                           | Arabinogalactan<br>Synthesis                    |
| AL4D     | D-arabinitol 4-<br>dehydrogenase                                                                                                                                                                | arabl-D[c] + nad[c] -><br>xylu-D[c] + nadh[c] +<br>h[c]   | Rv1928c                                                                                                                                                                                                                                                                                                                                                                                                                                                                                                                                                                                                                   | Arabinogalactan<br>Synthesis                    |



10 Fig. S5 - Spindle Map Rv3264c

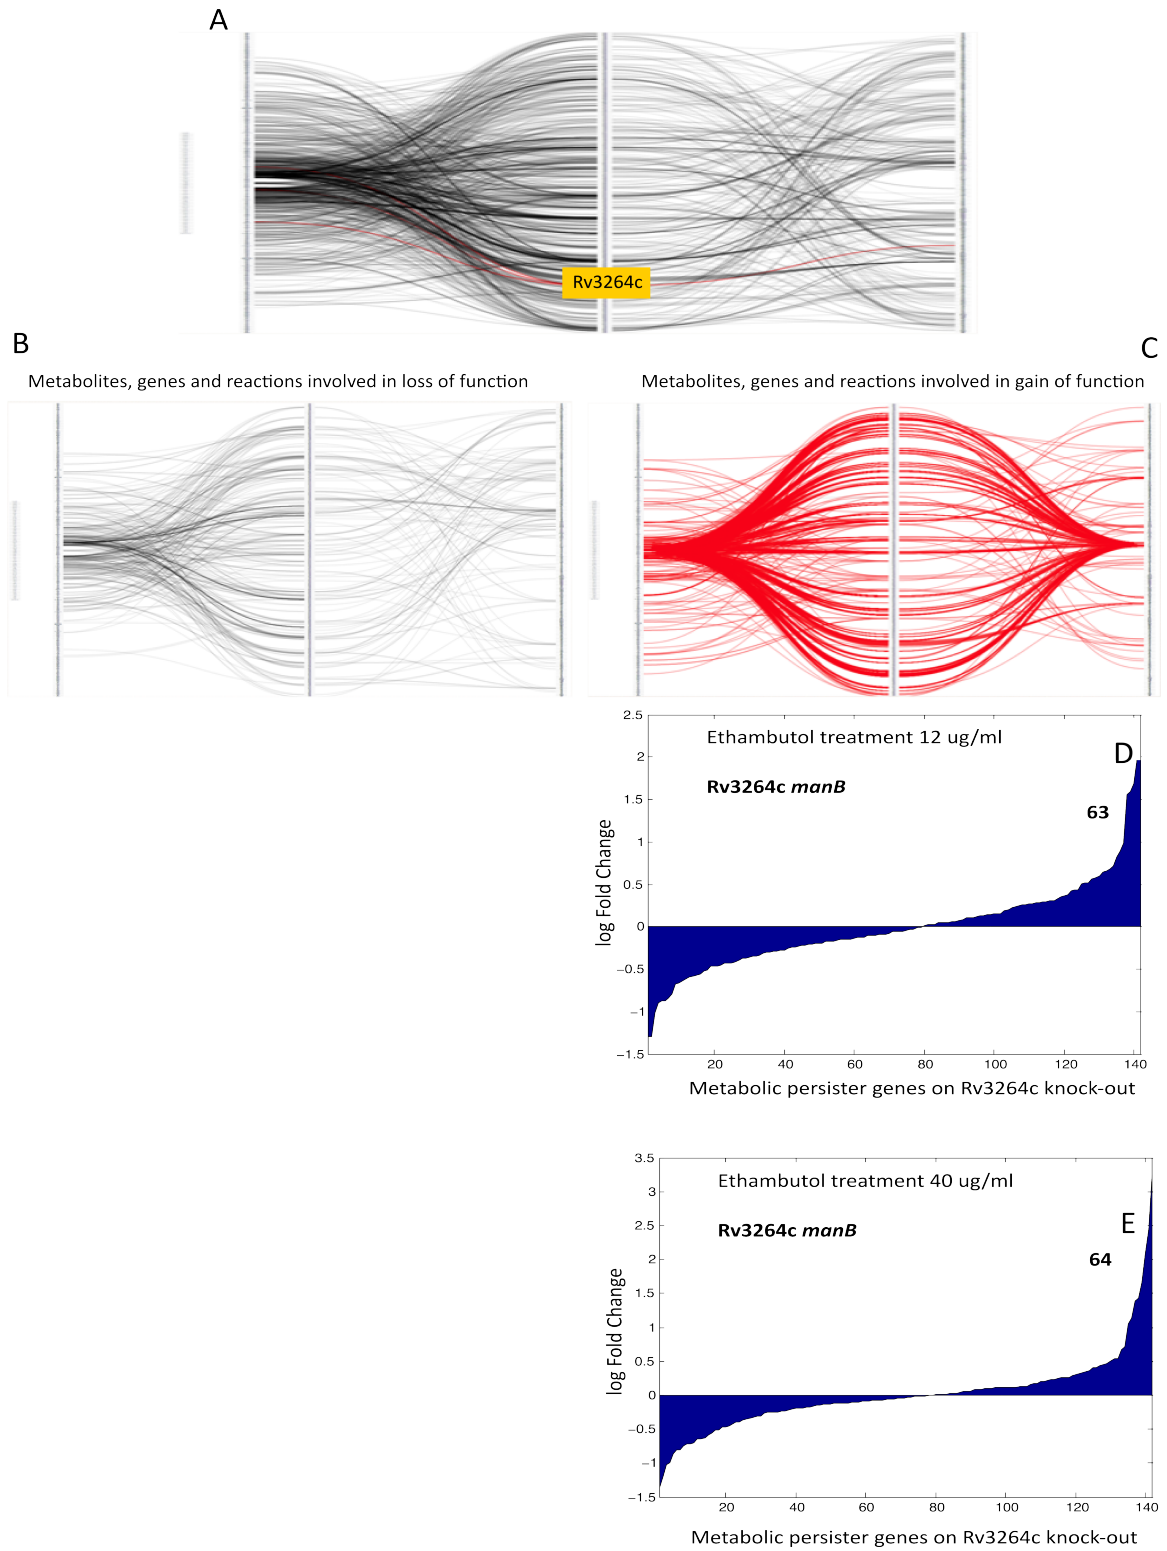

## 11 Table - S20 Metabolic Persister Reactions, Genes and Pathway on Rv3264c Deletion

Table 6: Metabolic persister reactions, gene and pathways on Rv3264c deletion

| Reaction | Description                                            | Formula                                                                        | Genes              | Pathways                         |
|----------|--------------------------------------------------------|--------------------------------------------------------------------------------|--------------------|----------------------------------|
| ACKr     | acetate kinase                                         | $ac[c] + atp[c] \rightarrow actp[c] + adp[c]$                                  | Rv0409             | Pyruvate Metabolism              |
| ACODA    | acetylornithine deacetylase                            | $acorn[c] + h_2o[c] \rightarrow ac[c] + orn[c]$                                |                    | Other Amino Acid Metabolism      |
| ADK1     | adenylate kinase                                       | $amp[c] + atp[c] \rightleftharpoons 2 adp[c]$                                  | Rv0733             | Purine Metabolism                |
| ADK2     | adenylate kinase<br>Inorganic triphosphate             | $amp[c] + pppi[c] \rightleftharpoons adp[c] + ppi[c]$                          | Rv0733             | Purine Metabolism                |
| ADK4     | adenylate kinase<br>ITP                                | $amp[c] + itp[c] \rightleftharpoons adp[c] + idp[c]$                           | Rv0733             | Nucleotide Sugar Metabolism      |
| ARGt5r   | L arginine transport via diffusion                     | $arg-L[e] \rightleftharpoons arg-L[c]$                                         | Rv2320c            | Transport                        |
| ASPO5    | L aspartate oxidase                                    | $asp-L[c] + fum[c] \rightarrow h[c] + iasp[c] + succ[c]$                       | Rv1595             | Alanine and Aspartate Metabolism |
| AST      | Arginine succinyltransferase                           | $arg-L[c] + succoa[c] \rightarrow coa[c] + h[c] + succarg[c]$                  |                    | Arginine and Proline Metabolism  |
| CAT      | catalase                                               | $2 h_2o_2[c] \rightarrow 2 h_2o[c] + o_2[c]$                                   | Rv1908c            | Redox Metabolism                 |
| CO2t     | CO2 transporter via diffusion                          | $co_2[e] \rightleftharpoons co_2[c]$                                           |                    | Transport                        |
| CODH2r   | carbon monoxide dehydrogenase<br>acetyl CoA synthase 2 | $co[c] + 2 fdox[c] + h_2o[c] \rightleftharpoons co_2[c] + 2 fdred[c] + 2 h[c]$ | Rv0373c<br>Rv0375c | Rv0374c<br>Redox Metabolism      |
| CODH3    | carbon monoxide dehydrogenase<br>acetyl CoA synthase 2 | $adfdOX[c] + 2 co[c] + 2 h_2o[c] \rightarrow adfdRD[c] + 2 co_2[c] + 2 h[c]$   | Rv0373c<br>Rv0375c | Rv0374c<br>Redox Metabolism      |
| DCTPD2   | dCTP deaminase                                         | $ctp[c] + h_2o[c] + h[c] \rightarrow nh_4[c] + utp[c]$                         | Rv0321             | Pyrimidine Metabolism            |
| DHORD2   | dihydroorotic acid dehydrogenase<br>quinone8           | $dhor-S[c] + q_8[c] \rightarrow orot[c] + q_8h_2[c]$                           | Rv2139             | Pyrimidine Metabolism            |
| DHORD3   | dihydroorotic acid dehydrogenase<br>menaquinone 6      | $dhor-S[c] + mqn6[c] \rightleftharpoons mql6[c] + orot[c]$                     | Rv2139             | Pyrimidine Metabolism            |

*Continued on next page*

Table 6 – continued from previous page

| Reaction    | Description                                        | Formula                                                                                                                                                                                                                                    | Genes                                       | Pathways                  |
|-------------|----------------------------------------------------|--------------------------------------------------------------------------------------------------------------------------------------------------------------------------------------------------------------------------------------------|---------------------------------------------|---------------------------|
| ECHH-0      | Ech hydrogenase no electron transport              | $2 \text{ fdox}[c] + \text{ h2}[c] \rightleftharpoons 2 \text{ fdred}[c] + 2 \text{ h}[c]$                                                                                                                                                 |                                             | Miscellaneous             |
| ETHAt       | ethanolamine transport via diffusion extracellular | $\text{ etha}[e] \rightleftharpoons \text{ etha}[c]$                                                                                                                                                                                       |                                             | Transport                 |
| EX-arg-L(e) | L Arginine exchange                                | $\text{ arg-L}[e] \rightleftharpoons$                                                                                                                                                                                                      |                                             | Exchange                  |
| EX-etha(e)  | Ethanolamine exchange                              | $\text{ etha}[e] \rightleftharpoons$                                                                                                                                                                                                       |                                             | Exchange                  |
| EX-gly(e)   | Glycine exchange                                   | $\text{ gly}[e] \rightleftharpoons$                                                                                                                                                                                                        |                                             | Exchange                  |
| EX-k(e)     | K exchange                                         | $\text{ k}[e] \rightleftharpoons$                                                                                                                                                                                                          |                                             | Exchange                  |
| EX-mal-L(e) | L Malate exchange                                  | $\text{ mal-L}[e] \rightleftharpoons$                                                                                                                                                                                                      |                                             | Exchange                  |
| EX-na1(e)   | Sodium exchange                                    | $\text{ na1}[e] \rightleftharpoons$                                                                                                                                                                                                        |                                             | Exchange                  |
| EX-ser-L(e) | L Serine exchange                                  | $\text{ ser-L}[e] \rightleftharpoons$                                                                                                                                                                                                      |                                             | Exchange                  |
| FACOAL140   | fatty acid CoA ligase tetradecanoate               | $\text{ atp}[c] + \text{ coa}[c] + \text{ ttdca}[c] \rightleftharpoons \text{ amp}[c] + \text{ ppi}[c] + \text{ tdcoa}[c]$                                                                                                                 | Rv1529 Rv3826                               | Fatty Acid Metabolism     |
| FACOAL161   | fatty acid CoA ligase hexadecenoate                | $\text{ atp}[c] + \text{ coa}[c] + \text{ hdcea}[c] \rightleftharpoons \text{ amp}[c] + \text{ hdcoa}[c] + \text{ ppi}[c]$                                                                                                                 | Rv1529 Rv3826                               | Fatty Acid Metabolism     |
| FAO1        | Fatty acid oxidation tetradecanoate                | $\text{ atp}[c] + 7 \text{ coa}[c] + 6 \text{ fad}[c] + 6 \text{ h2o}[c] + 6 \text{ nad}[c] + \text{ ttdca}[c] \rightarrow 7 \text{ accoa}[c] + \text{ amp}[c] + 6 \text{ fadh2}[c] + 6 \text{ h}[c] + 6 \text{ nadh}[c] + \text{ ppi}[c]$ | Rv0468 Rv0859 Rv0860 Rv1144 Rv1323          | Fatty Acid Metabolism     |
| FORMCOAL    | formyl coa CoA ligase                              | $\text{ atp}[c] + \text{ coa}[c] + \text{ for}[c] \rightleftharpoons \text{ amp}[c] + \text{ forcoa}[c] + \text{ ppi}[c]$                                                                                                                  |                                             | Redox Metabolism          |
| FRD         | fumarate reductase                                 | $\text{ fadh2}[c] + \text{ fum}[c] \rightarrow \text{ fad}[c] + \text{ succ}[c]$                                                                                                                                                           | Rv1552 Rv1553 Rv1554 Rv1555                 | Citric Acid Cycle         |
| FRD2        | fumarate reductase                                 | $\text{ fum}[c] + \text{ mql8}[c] \rightarrow \text{ mqn8}[c] + \text{ succ}[c]$                                                                                                                                                           | Rv0247c Rv0248c Rv3316 Rv3317 Rv3318 Rv3319 | Citric Acid Cycle         |
| FRD5        | fumarate reductase                                 | $\text{ fum}[c] + \text{ mql6}[c] \rightleftharpoons \text{ mqn6}[c] + \text{ succ}[c]$                                                                                                                                                    | Rv1552 Rv1553 Rv1554 Rv1555                 | Citric Acid Cycle         |
| G3PAT160    | glycerol 3 phosphate acyltransferase C160          | $\text{ gly3p}[c] + \text{ palmACP}[c] \rightarrow \text{ 1hdecg3p}[c] + \text{ ACP}[c]$                                                                                                                                                   | Rv1551                                      | Fatty Acid Metabolism     |
| G6PDH2      | glucose 6 phosphate dehydrogenase                  | $\text{ g6p}[c] + \text{ nadp}[c] \rightarrow \text{ 6pgl}[c] + 3 \text{ h}[c] + \text{ nadph}[c]$                                                                                                                                         | Rv1121 Rv1447c                              | Pentose Phosphate Pathway |
| GLY2r       | glycine reversible transport via proton symport    | $\text{ gly}[e] + \text{ h}[e] \rightleftharpoons \text{ gly}[c] + \text{ h}[c]$                                                                                                                                                           | Rv1704c                                     | Transport                 |

*Continued on next page*

Table 6 – continued from previous page

| Reaction     | Description                                                            | Formula                                                                                       | Genes                                                                                                                         | Pathways                                |
|--------------|------------------------------------------------------------------------|-----------------------------------------------------------------------------------------------|-------------------------------------------------------------------------------------------------------------------------------|-----------------------------------------|
| GPDDA2       | Glycerophosphodiester phosphodiesterase<br>Glycerophospho-ethanolamine | $g3pe[c] + h2o[c] \rightarrow etha[c] + glyc3p[c] + h[c]$                                     | Rv0317c Rv2277c<br>Rv3842c                                                                                                    | Fatty Acid Metabolism                   |
| GTHOr        | glutathione oxidoreductase                                             | $gthox[c] + h[c] + nadph[c] \rightleftharpoons 2 gthrd[c] + nadp[c]$                          | Rv2855                                                                                                                        | Glutamate Metabolism                    |
| GTPDPK       | GTP diphosphokinase                                                    | $atp[c] + gtp[c] \rightarrow amp[c] + gdptp[c] + h[c]$                                        | Rv2583c                                                                                                                       | Purine Metabolism                       |
| HSDy         | homoserine dehydrogenase NADPH                                         | $hom-L[c] + nadp[c] \rightleftharpoons aspsa[c] + h[c] + nadph[c]$                            | Rv1294                                                                                                                        | Glycine Serine and Threonine Metabolism |
| Kt3r         | potassium proton antiporter                                            | $h[e] + k[c] \rightleftharpoons h[c] + k[e]$                                                  | Rv2691 Rv2692                                                                                                                 | Transport                               |
| LPLIPAL2E160 | Lysophospholipase L2 2 acylglycerophospho-ethanolamine n C160          | $2agpe160[c] + h2o[c] \rightarrow g3pe[c] + h[c] + hdca[c]$                                   | Rv0183                                                                                                                        | Fatty Acid Metabolism                   |
| L-LACD2      | L Lactate dehydrogenase ubiquinone                                     | $lac-L[c] + q8[c] \rightarrow pyr[c] + q8h2[c]$                                               | Rv1872c                                                                                                                       | Pyruvate Metabolism                     |
| MALt2r       | L malate reversible transport via proton symport                       | $h[e] + mal-L[e] \rightleftharpoons h[c] + mal-L[c]$                                          | Rv2443                                                                                                                        | Transport                               |
| ME1          | malic enzyme NAD                                                       | $mal-L[c] + nad[c] \rightarrow co2[c] + nadh[c] + pyr[c]$                                     | Rv2332                                                                                                                        | Pyruvate Metabolism                     |
| MYCTR        | mycothiol reductase nadp dependent                                     | $2 msh[c] + nadp[c] \rightleftharpoons h[c] + mssg[c] + nadph[c]$                             | Rv2855                                                                                                                        | Redox Metabolism                        |
| MYCTR2       | mycothiol reductase glutathione exchange                               | $gthox[c] + 2 msh[c] \rightleftharpoons 2 gthrd[c] + mssg[c]$                                 | Rv2855                                                                                                                        | Redox Metabolism                        |
| NADH2r       | NADH dehydrogenase                                                     | $h[c] + nadh[c] + q[c] \rightleftharpoons nad[c] + qh2[c]$                                    | Rv0082 Rv3145<br>Rv3146 Rv3147<br>Rv3148 Rv3149<br>Rv3150 Rv3151<br>Rv3152 Rv3153<br>Rv3154 Rv3155<br>Rv3156 Rv3157<br>Rv3158 | Redox Metabolism                        |
| NADS2        | NAD synthase glutamine hydrolysing                                     | $atp[c] + dnad[c] + gln-L[c] + h2o[c] \rightarrow amp[c] + glu-L[c] + h[c] + nad[c] + ppi[c]$ | Rv2438c                                                                                                                       | Glutamate Metabolism                    |

*Continued on next page*

Table 6 – continued from previous page

| Reaction   | Description                                                  | Formula                                                               | Genes         | Pathways                        |
|------------|--------------------------------------------------------------|-----------------------------------------------------------------------|---------------|---------------------------------|
| NAKtr      | potassium sodium antiporter                                  | $k[c] + na1[e] \rightleftharpoons k[e] + na1[c]$                      | Rv3236c       | Transport                       |
| NAt3-1     | sodium proton antiporter HNA is 11                           | $h[e] + na1[c] \rightleftharpoons h[c] + na1[e]$                      | Rv2287        | Transport                       |
| NDPK9      | nucleoside diphosphate kinase ATPIDP                         | $atp[c] + idp[c] \rightleftharpoons adp[c] + itp[c]$                  | Rv2445c       | Pyrimidine Metabolism           |
| NNAT       | nicotinate nucleotide adenylyltransferase                    | $atp[c] + h[c] + nicrnt[c] \rightarrow dnad[c] + ppi[c]$              | Rv2421c       | Pantothenate and CoA Metabolism |
| NNDPR      | nicotinate nucleotide diphosphorylase carboxylating          | $2 h[c] + prpp[c] + quln[c] \rightarrow co2[c] + nicrnt[c] + ppi[c]$  | Rv1596        | Pantothenate and CoA Metabolism |
| ORNt       | ornithine transport via diffusion extracellular to periplasm | $orn[e] \rightleftharpoons orn[c]$                                    | Rv2320c       | Transport                       |
| OXGDC      | 2 oxoglutarate decarboxylase                                 | $akg[c] + h[c] \rightarrow co2[c] + succal[c]$                        | Rv1248c       | Citric Acid Cycle               |
| PGL        | 6 phosphogluconolactonase                                    | $6pgl[c] + h2o[c] \rightarrow 6pgc[c] + h[c]$                         | Rv1445c       | Pentose Phosphate Pathway       |
| PHTO       | phthicol oxygenase                                           | $2 o2[c] + phthclh2[c] \rightarrow 2 h[c] + 2 o2s[c] + phthcl[c]$     |               | Ubiquinone Metabolism           |
| PLIPA1E160 | Phospholipase A1 phosphatidylethanolamine C160               | $h2o[c] + pe160[c] \rightarrow 2agpe160[c] + h[c] + hdca[c]$          |               | Fatty Acid Metabolism           |
| PPDK       | Pyruvate phosphate dikinase                                  | $atp[c] + pi[c] + pyr[c] \rightarrow amp[c] + h[c] + pep[c] + ppi[c]$ | Rv1127c       | Pyruvate Metabolism             |
| PPK2       | polyphosphate kinase                                         | $atp[c] + ppi[c] \rightarrow adp[c] + pppi[c]$                        | Rv2984        | Purine Metabolism               |
| PTAr       | phosphotransacetylase                                        | $accoa[c] + pi[c] \rightleftharpoons actp[c] + coa[c]$                | Rv0408 Rv3914 | Pyruvate Metabolism             |
| QRr        | Quinone reductase                                            | $h[c] + nadph[c] + q[c] \rightleftharpoons nadp[c] + qh2[c]$          | Rv3777        | Redox Metabolism                |
| QULNS      | quinolinate synthase                                         | $dhap[c] + iasp[c] \rightarrow 2 h2o[c] + pi[c] + quln[c]$            | Rv1594        | Pantothenate and CoA Metabolism |
| SERt2r     | L serine reversible transport via proton symport             | $h[e] + ser-L[e] \rightleftharpoons h[c] + ser-L[c]$                  | Rv1704c       | Transport                       |
| SGDS       | Succinylglutamate desuccinylase                              | $h2o[c] + sucglu[c] \rightarrow glu-L[c] + succ[c]$                   |               | Arginine and Proline Metabolism |

Continued on next page

Table 6 – continued from previous page

| Reaction | Description                                 | Formula                                                                  | Genes                 | Pathways                                |
|----------|---------------------------------------------|--------------------------------------------------------------------------|-----------------------|-----------------------------------------|
| SGSAD    | Succinylglutamic semialdehyde dehydrogenase | $h_2o[c] + nad[c] + sucgsa[c] \rightarrow 2 h[c] + nadh[c] + sucglu[c]$  |                       | Arginine and Proline Metabolism         |
| SOTA     | Succinylornithine transaminase              | $akg[c] + sucorn[c] \rightarrow glu-L[c] + sucgsa[c]$                    |                       | Arginine and Proline Metabolism         |
| SPODM    | superoxide dismutase                        | $2 h[c] + 2 o_2s[c] \rightarrow h_2o_2[c] + o_2[c]$                      | Rv0432 Rv1908c Rv3846 | Cofactor Metabolism                     |
| SSALy    | succinate semialdehyde dehydrogenase NADP   | $h_2o[c] + nadp[c] + succsal[c] \rightarrow 2 h[c] + nadph[c] + succ[c]$ | Rv0234c Rv1731        | Glutamate Metabolism                    |
| THRS     | threonine synthase                          | $h_2o[c] + phom[c] \rightarrow pi[c] + thr-L[c]$                         | Rv1295                | Glycine Serine and Threonine Metabolism |
| XYLK     | xylulokinase                                | $atp[c] + xylu-D[c] \rightarrow adp[c] + h[c] + xu5p-D[c]$               | Rv0729                | Sugar Metabolism                        |
| PPGPP    | PPGPP-3-pyrophosphohydrolase                | $gdpdp[c] + h_2o[c] \rightarrow gdp[c] + ppi[c]$                         |                       | Purine Metabolism                       |

*Continued on next page*

Table 6 – continued from previous page

| Reaction | Description                                                                                                                                                                          | Formula                                                                          | Genes                                                                                                                                                                                                                                                                                                                                                                                                                                                                                                                                                                                                                     | Pathways                      |
|----------|--------------------------------------------------------------------------------------------------------------------------------------------------------------------------------------|----------------------------------------------------------------------------------|---------------------------------------------------------------------------------------------------------------------------------------------------------------------------------------------------------------------------------------------------------------------------------------------------------------------------------------------------------------------------------------------------------------------------------------------------------------------------------------------------------------------------------------------------------------------------------------------------------------------------|-------------------------------|
| FAD-8    | acyl-CoA dehydrogenase<br>fadE1-36 AND<br>enoyl-CoA hydratase/isomerase<br>echA1-21 AND 3-hydroxyacyl-CoA dehydrogenase<br>fadB2-5 AND<br>acetyl-CoA C-acetyltransferase<br>fadA2-13 | tdcoa[c] + fad[c] + nad[c] + coa[c] -> dodcoa[c] + fadh2[c] + nadh[c] + accoa[c] | Rv0131c Rv0154c<br>Rv0215c Rv0231<br>Rv0244c Rv0271c<br>Rv0400c Rv0752c<br>Rv0873 Rv0972c<br>Rv0975c Rv1346<br>Rv1467c Rv1679<br>Rv1933c Rv1934c<br>Rv2724c Rv2789c<br>Rv3061c Rv3139<br>Rv3140 Rv3274c<br>Rv3504 Rv3505<br>Rv3543c Rv3544c<br>Rv3560c Rv3562<br>Rv3563 Rv3564<br>Rv3573c Rv3761c<br>Rv3797 Rv0672<br>Rv2500c Rv0222<br>Rv0456c Rv0632c<br>Rv0673 Rv0675<br>Rv0971c Rv1070c<br>Rv1071c Rv1141c<br>Rv1142c Rv1472<br>Rv1935c Rv2486<br>Rv2679 Rv2831<br>Rv3039c Rv3516<br>Rv3550 Rv3774<br>Rv0905 Rv3374<br>Rv3373 Rv0468<br>Rv1715 Rv1912c<br>Rv3141 Rv0243<br>Rv1074c Rv3546<br>Rv3556c Rv1323<br>Rv0859 | Beta oxidation of fatty acids |
|          |                                                                                                                                                                                      |                                                                                  |                                                                                                                                                                                                                                                                                                                                                                                                                                                                                                                                                                                                                           | <i>Continued on next page</i> |

Table 6 – continued from previous page

| Reaction | Description                                                                                                                                                                          | Formula                                                                                   | Genes                                                                                                                                                                                                                                                                                                                                                                                                                                                                                                                                                                                                                     | Pathways                      |
|----------|--------------------------------------------------------------------------------------------------------------------------------------------------------------------------------------|-------------------------------------------------------------------------------------------|---------------------------------------------------------------------------------------------------------------------------------------------------------------------------------------------------------------------------------------------------------------------------------------------------------------------------------------------------------------------------------------------------------------------------------------------------------------------------------------------------------------------------------------------------------------------------------------------------------------------------|-------------------------------|
| FAD-9    | acyl-CoA dehydrogenase<br>fadE1-36 AND<br>enoyl-CoA hydratase/isomerase<br>echA1-21 AND 3-hydroxyacyl-CoA dehydrogenase<br>fadB2-5 AND<br>acetyl-CoA C-acetyltransferase<br>fadA2-14 | dodcoa[c] + fad[c]<br>+ nad[c] + coa[c] -><br>decoa[c] + fadh2[c] +<br>nadh[c] + accoa[c] | Rv0131c Rv0154c<br>Rv0215c Rv0231<br>Rv0244c Rv0271c<br>Rv0400c Rv0752c<br>Rv0873 Rv0972c<br>Rv0975c Rv1346<br>Rv1467c Rv1679<br>Rv1933c Rv1934c<br>Rv2724c Rv2789c<br>Rv3061c Rv3139<br>Rv3140 Rv3274c<br>Rv3504 Rv3505<br>Rv3543c Rv3544c<br>Rv3560c Rv3562<br>Rv3563 Rv3564<br>Rv3573c Rv3761c<br>Rv3797 Rv0672<br>Rv2500c Rv0222<br>Rv0456c Rv0632c<br>Rv0673 Rv0675<br>Rv0971c Rv1070c<br>Rv1071c Rv1141c<br>Rv1142c Rv1472<br>Rv1935c Rv2486<br>Rv2679 Rv2831<br>Rv3039c Rv3516<br>Rv3550 Rv3774<br>Rv0905 Rv3374<br>Rv3373 Rv0468<br>Rv1715 Rv1912c<br>Rv3141 Rv0243<br>Rv1074c Rv3546<br>Rv3556c Rv1323<br>Rv0859 | Beta oxidation of fatty acids |
|          |                                                                                                                                                                                      |                                                                                           |                                                                                                                                                                                                                                                                                                                                                                                                                                                                                                                                                                                                                           | <i>Continued on next page</i> |



Table 6 – continued from previous page

| Reaction | Description                                                                                                                                                                          | Formula                                                                             | Genes                                                                                                                                                                                                                                                                                                                                                                                                                                                                                                                                                                                                                     | Pathways                                  |
|----------|--------------------------------------------------------------------------------------------------------------------------------------------------------------------------------------|-------------------------------------------------------------------------------------|---------------------------------------------------------------------------------------------------------------------------------------------------------------------------------------------------------------------------------------------------------------------------------------------------------------------------------------------------------------------------------------------------------------------------------------------------------------------------------------------------------------------------------------------------------------------------------------------------------------------------|-------------------------------------------|
| FAD-15   | acyl-CoA dehydrogenase<br>fadE1-36 AND<br>enoyl-CoA hydratase/isomerase<br>echA1-21 AND 3-hydroxyacyl-CoA dehydrogenase<br>fadB2-5 AND<br>acetyl-CoA C-acetyltransferase<br>fadA2-20 | hdcoa[c] + fad[c] + nad[c] + coa[c] -> c5tetdcoa[c] + fadh2[c] + nadh[c] + accoa[c] | Rv0131c Rv0154c<br>Rv0215c Rv0231<br>Rv0244c Rv0271c<br>Rv0400c Rv0752c<br>Rv0873 Rv0972c<br>Rv0975c Rv1346<br>Rv1467c Rv1679<br>Rv1933c Rv1934c<br>Rv2724c Rv2789c<br>Rv3061c Rv3139<br>Rv3140 Rv3274c<br>Rv3504 Rv3505<br>Rv3543c Rv3544c<br>Rv3560c Rv3562<br>Rv3563 Rv3564<br>Rv3573c Rv3761c<br>Rv3797 Rv0672<br>Rv2500c Rv0222<br>Rv0456c Rv0632c<br>Rv0673 Rv0675<br>Rv0971c Rv1070c<br>Rv1071c Rv1141c<br>Rv1142c Rv1472<br>Rv1935c Rv2486<br>Rv2679 Rv2831<br>Rv3039c Rv3516<br>Rv3550 Rv3774<br>Rv0905 Rv3374<br>Rv3373 Rv0468<br>Rv1715 Rv1912c<br>Rv3141 Rv0243<br>Rv1074c Rv3546<br>Rv3556c Rv1323<br>Rv0859 | Beta oxidation of unsaturated fatty acids |
|          |                                                                                                                                                                                      |                                                                                     |                                                                                                                                                                                                                                                                                                                                                                                                                                                                                                                                                                                                                           | <i>Continued on next page</i>             |

Table 6 – continued from previous page

| Reaction | Description                                                                                                                                                                          | Formula                                                                                           | Genes                                                                                                                                                                                                                                                                                                                                                                                                                                                                                                                                                                                                                     | Pathways                                  |
|----------|--------------------------------------------------------------------------------------------------------------------------------------------------------------------------------------|---------------------------------------------------------------------------------------------------|---------------------------------------------------------------------------------------------------------------------------------------------------------------------------------------------------------------------------------------------------------------------------------------------------------------------------------------------------------------------------------------------------------------------------------------------------------------------------------------------------------------------------------------------------------------------------------------------------------------------------|-------------------------------------------|
| FAD-16   | acyl-CoA dehydrogenase<br>fadE1-36 AND<br>enoyl-CoA hydratase/isomerase<br>echA1-21 AND 3-hydroxyacyl-CoA dehydrogenase<br>fadB2-5 AND<br>acetyl-CoA C-acetyltransferase<br>fadA2-21 | $c5tetdcoa[c] + fad[c] + nad[c] + coa[c] \rightarrow c3dodcoa[c] + fadh2[c] + nadh[c] + accoa[c]$ | Rv0131c Rv0154c<br>Rv0215c Rv0231<br>Rv0244c Rv0271c<br>Rv0400c Rv0752c<br>Rv0873 Rv0972c<br>Rv0975c Rv1346<br>Rv1467c Rv1679<br>Rv1933c Rv1934c<br>Rv2724c Rv2789c<br>Rv3061c Rv3139<br>Rv3140 Rv3274c<br>Rv3504 Rv3505<br>Rv3543c Rv3544c<br>Rv3560c Rv3562<br>Rv3563 Rv3564<br>Rv3573c Rv3761c<br>Rv3797 Rv0672<br>Rv2500c Rv0222<br>Rv0456c Rv0632c<br>Rv0673 Rv0675<br>Rv0971c Rv1070c<br>Rv1071c Rv1141c<br>Rv1142c Rv1472<br>Rv1935c Rv2486<br>Rv2679 Rv2831<br>Rv3039c Rv3516<br>Rv3550 Rv3774<br>Rv0905 Rv3374<br>Rv3373 Rv0468<br>Rv1715 Rv1912c<br>Rv3141 Rv0243<br>Rv1074c Rv3546<br>Rv3556c Rv1323<br>Rv0859 | Beta oxidation of unsaturated fatty acids |
|          |                                                                                                                                                                                      |                                                                                                   |                                                                                                                                                                                                                                                                                                                                                                                                                                                                                                                                                                                                                           | <i>Continued on next page</i>             |

Table 6 – continued from previous page

| Reaction | Description                                                                                                                                                                          | Formula                       | Genes                                                                                                                                                                                                                                                                                                                                                                                                                                                                                                                                                                                                                     | Pathways                                  |
|----------|--------------------------------------------------------------------------------------------------------------------------------------------------------------------------------------|-------------------------------|---------------------------------------------------------------------------------------------------------------------------------------------------------------------------------------------------------------------------------------------------------------------------------------------------------------------------------------------------------------------------------------------------------------------------------------------------------------------------------------------------------------------------------------------------------------------------------------------------------------------------|-------------------------------------------|
| FAD-17   | acyl-CoA dehydrogenase<br>fadE1-36 AND<br>enoyl-CoA hydratase/isomerase<br>echA1-21 AND 3-hydroxyacyl-CoA dehydrogenase<br>fadB2-5 AND<br>acetyl-CoA C-acetyltransferase<br>fadA2-22 | c3dodcoa[c] -><br>t2dodcoa[c] | Rv0131c Rv0154c<br>Rv0215c Rv0231<br>Rv0244c Rv0271c<br>Rv0400c Rv0752c<br>Rv0873 Rv0972c<br>Rv0975c Rv1346<br>Rv1467c Rv1679<br>Rv1933c Rv1934c<br>Rv2724c Rv2789c<br>Rv3061c Rv3139<br>Rv3140 Rv3274c<br>Rv3504 Rv3505<br>Rv3543c Rv3544c<br>Rv3560c Rv3562<br>Rv3563 Rv3564<br>Rv3573c Rv3761c<br>Rv3797 Rv0672<br>Rv2500c Rv0222<br>Rv0456c Rv0632c<br>Rv0673 Rv0675<br>Rv0971c Rv1070c<br>Rv1071c Rv1141c<br>Rv1142c Rv1472<br>Rv1935c Rv2486<br>Rv2679 Rv2831<br>Rv3039c Rv3516<br>Rv3550 Rv3774<br>Rv0905 Rv3374<br>Rv3373 Rv0468<br>Rv1715 Rv1912c<br>Rv3141 Rv0243<br>Rv1074c Rv3546<br>Rv3556c Rv1323<br>Rv0859 | Beta oxidation of unsaturated fatty acids |
|          |                                                                                                                                                                                      |                               |                                                                                                                                                                                                                                                                                                                                                                                                                                                                                                                                                                                                                           | <i>Continued on next page</i>             |

Table 6 – continued from previous page

| Reaction | Description                                                                                                                                                                                     | Formula                                                   | Genes                                                                                                                                                                                                                                                                                                                                                                                                                                                                                                                                                                                                                     | Pathways                                        |
|----------|-------------------------------------------------------------------------------------------------------------------------------------------------------------------------------------------------|-----------------------------------------------------------|---------------------------------------------------------------------------------------------------------------------------------------------------------------------------------------------------------------------------------------------------------------------------------------------------------------------------------------------------------------------------------------------------------------------------------------------------------------------------------------------------------------------------------------------------------------------------------------------------------------------------|-------------------------------------------------|
| FAD-19   | acyl-CoA dehydrogenase<br>fadE1-36 AND<br>enoyl-CoA hydratase/isomerase<br>echA1-21 AND 3-<br>hydroxyacyl-CoA<br>dehydrogenase<br>fadB2-5 AND<br>acetyl-CoA C-<br>acetyltransferase<br>fadA2-24 | d2hdodcoa[c] + nad[c] -<br>> dodcoa[c] + nadh[c]          | Rv0131c Rv0154c<br>Rv0215c Rv0231<br>Rv0244c Rv0271c<br>Rv0400c Rv0752c<br>Rv0873 Rv0972c<br>Rv0975c Rv1346<br>Rv1467c Rv1679<br>Rv1933c Rv1934c<br>Rv2724c Rv2789c<br>Rv3061c Rv3139<br>Rv3140 Rv3274c<br>Rv3504 Rv3505<br>Rv3543c Rv3544c<br>Rv3560c Rv3562<br>Rv3563 Rv3564<br>Rv3573c Rv3761c<br>Rv3797 Rv0672<br>Rv2500c Rv0222<br>Rv0456c Rv0632c<br>Rv0673 Rv0675<br>Rv0971c Rv1070c<br>Rv1071c Rv1141c<br>Rv1142c Rv1472<br>Rv1935c Rv2486<br>Rv2679 Rv2831<br>Rv3039c Rv3516<br>Rv3550 Rv3774<br>Rv0905 Rv3374<br>Rv3373 Rv0468<br>Rv1715 Rv1912c<br>Rv3141 Rv0243<br>Rv1074c Rv3546<br>Rv3556c Rv1323<br>Rv0859 | Beta oxidation of<br>unsaturated fatty<br>acids |
| ALDR     | Aldolase reductase                                                                                                                                                                              | arab-D[c] + nadph[c]<br>+ h[c] -> arabl-D[c] +<br>nadp[c] |                                                                                                                                                                                                                                                                                                                                                                                                                                                                                                                                                                                                                           | Arabinogalactan<br>Synthesis                    |
| AL4D     | D-arabinitol 4-<br>dehydrogenase                                                                                                                                                                | arabl-D[c] + nad[c] -><br>xylu-D[c] + nadh[c] +<br>h[c]   | Rv1928c                                                                                                                                                                                                                                                                                                                                                                                                                                                                                                                                                                                                                   | Arabinogalactan<br>Synthesis                    |

12 Fig. S6 - Spindle Map Rv3266c

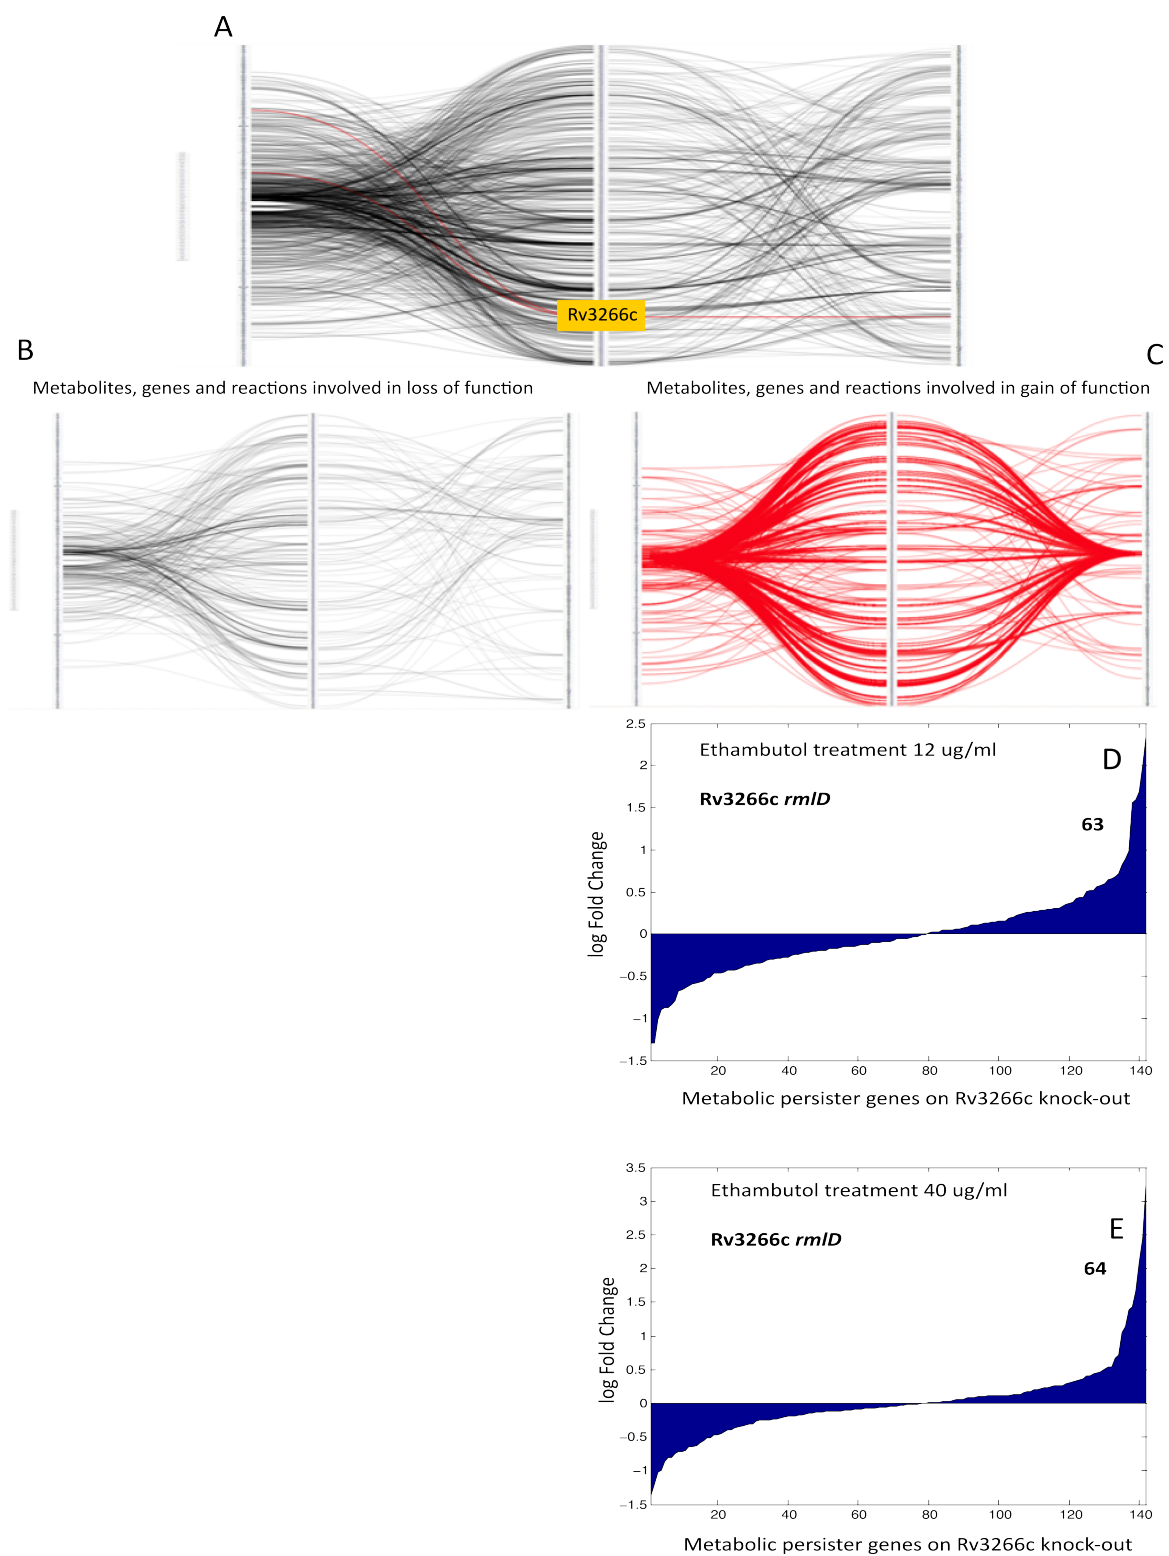

### 13 Table - S21 Metabolic Persister Reactions, Genes and Pathway on Rv3266c Deletion

Table 7: Metabolic persister reactions, gene and pathways on Rv3266c deletion

| Reaction | Description                                                    | Formula                                                                        | Genes              | Pathways                         |
|----------|----------------------------------------------------------------|--------------------------------------------------------------------------------|--------------------|----------------------------------|
| ACKr     | acetate kinase                                                 | $ac[c] + atp[c] \rightarrow actp[c] + adp[c]$                                  | Rv0409             | Pyruvate Metabolism              |
| ADK1     | adenylate kinase                                               | $amp[c] + atp[c] \rightleftharpoons 2 adp[c]$                                  | Rv0733             | Purine Metabolism                |
| ADK2     | adenylate kinase<br>Inorganic triphosphate                     | $amp[c] + pppi[c] \rightleftharpoons adp[c] + ppi[c]$                          | Rv0733             | Purine Metabolism                |
| ADK4     | adenylate kinase<br>ITP                                        | $amp[c] + itp[c] \rightleftharpoons adp[c] + idp[c]$                           | Rv0733             | Nucleotide Sugar Metabolism      |
| ARGt5r   | L arginine transport<br>via diffusion                          | $arg-L[e] \rightleftharpoons arg-L[c]$                                         | Rv2320c            | Transport                        |
| ASPO5    | L aspartate oxidase                                            | $asp-L[c] + fum[c] \rightarrow h[c] + iasp[c] + succ[c]$                       | Rv1595             | Alanine and Aspartate Metabolism |
| AST      | Arginine succinyltransferase                                   | $arg-L[c] + succoa[c] \rightarrow coa[c] + h[c] + sucarg[c]$                   |                    | Arginine and Proline Metabolism  |
| CAT      | catalase                                                       | $2 h_2o_2[c] \rightarrow 2 h_2o[c] + o_2[c]$                                   | Rv1908c            | Redox Metabolism                 |
| CO2t     | CO2 transporter via<br>diffusion                               | $co_2[e] \rightleftharpoons co_2[c]$                                           |                    | Transport                        |
| CODH2r   | carbon monoxide<br>dehydrogenase<br>acetyl CoA syn-<br>thase 2 | $co[c] + 2 fdox[c] + h_2o[c] \rightleftharpoons co_2[c] + 2 fdred[c] + 2 h[c]$ | Rv0373c<br>Rv0375c | Rv0374c<br>Redox Metabolism      |
| CODH3    | carbon monoxide<br>dehydrogenase<br>acetyl CoA syn-<br>thase 2 | $adfdOX[c] + 2 co[c] + 2 h_2o[c] \rightarrow adfdRD[c] + 2 co_2[c] + 2 h[c]$   | Rv0373c<br>Rv0375c | Rv0374c<br>Redox Metabolism      |
| DCTPD2   | dCTP deaminase                                                 | $ctp[c] + h_2o[c] + h[c] \rightarrow nh_4[c] + utp[c]$                         | Rv0321             | Pyrimidine Metabolism            |
| DHORD2   | dihydroorotic acid<br>dehydrogenase<br>quinone8                | $dhor-S[c] + q_8[c] \rightarrow orot[c] + q_8h_2[c]$                           | Rv2139             | Pyrimidine Metabolism            |
| DHORD3   | dihydroorotic acid<br>dehydrogenase<br>menaquinone 6           | $dhor-S[c] + mqn_6[c] \rightleftharpoons mql_6[c] + orot[c]$                   | Rv2139             | Pyrimidine Metabolism            |
| ECHH-0   | Ech hydrogenase no<br>electron transport                       | $2 fdox[c] + h_2[c] \rightleftharpoons 2 fdred[c] + 2 h[c]$                    |                    | Miscellaneous                    |

*Continued on next page*

Table 7 – continued from previous page

| Reaction    | Description                                        | Formula                                                                                                                         | Genes                                       | Pathways                  |
|-------------|----------------------------------------------------|---------------------------------------------------------------------------------------------------------------------------------|---------------------------------------------|---------------------------|
| ETHAt       | ethanolamine transport via diffusion extracellular | etha[e] <=> etha[c]                                                                                                             |                                             | Transport                 |
| EX-arg-L(e) | L Arginine exchange                                | arg-L[e] <=>                                                                                                                    |                                             | Exchange                  |
| EX-etha(e)  | Ethanolamine exchange                              | etha[e] <=>                                                                                                                     |                                             | Exchange                  |
| EX-gly(e)   | Glycine exchange                                   | gly[e] <=>                                                                                                                      |                                             | Exchange                  |
| EX-k(e)     | K exchange                                         | k[e] <=>                                                                                                                        |                                             | Exchange                  |
| EX-mal-L(e) | L Malate exchange                                  | mal-L[e] <=>                                                                                                                    |                                             | Exchange                  |
| EX-na1(e)   | Sodium exchange                                    | na1[e] <=>                                                                                                                      |                                             | Exchange                  |
| EX-ser-L(e) | L Serine exchange                                  | ser-L[e] <=>                                                                                                                    |                                             | Exchange                  |
| FACOAL140   | fatty acid CoA ligase tetradecanoate               | atp[c] + coa[c] + ttdca[c] <=> amp[c] + ppi[c] + tdcoa[c]                                                                       | Rv1529 Rv3826                               | Fatty Acid Metabolism     |
| FACOAL161   | fatty acid CoA ligase hexadecenoate                | atp[c] + coa[c] + hdcea[c] <=> amp[c] + hdcoa[c] + ppi[c]                                                                       | Rv1529 Rv3826                               | Fatty Acid Metabolism     |
| FAO1        | Fatty acid oxidation tetradecanoate                | atp[c] + 7 coa[c] + 6 fad[c] + 6 h2o[c] + 6 nad[c] + ttdca[c] -> 7 accoa[c] + amp[c] + 6 fadh2[c] + 6 h[c] + 6 nadh[c] + ppi[c] | Rv0468 Rv0859 Rv0860 Rv1144 Rv1323          | Fatty Acid Metabolism     |
| FORMCOAL    | formyl coa CoA ligase                              | atp[c] + coa[c] + for[c] <=> amp[c] + forcoa[c] + ppi[c]                                                                        |                                             | Redox Metabolism          |
| FRD         | fumarate reductase                                 | fadh2[c] + fum[c] -> fad[c] + succ[c]                                                                                           | Rv1552 Rv1553 Rv1554 Rv1555                 | Citric Acid Cycle         |
| FRD2        | fumarate reductase                                 | fum[c] + mql8[c] -> mqn8[c] + succ[c]                                                                                           | Rv0247c Rv0248c Rv3316 Rv3317 Rv3318 Rv3319 | Citric Acid Cycle         |
| FRD5        | fumarate reductase                                 | fum[c] + mql6[c] <=> mqn6[c] + succ[c]                                                                                          | Rv1552 Rv1553 Rv1554 Rv1555                 | Citric Acid Cycle         |
| G3PAT160    | glycerol 3 phosphate acyltransferase C160          | glyc3p[c] + palmACP[c] -> 1hdecg3p[c] + ACP[c]                                                                                  | Rv1551                                      | Fatty Acid Metabolism     |
| G6PDH2      | glucose 6 phosphate dehydrogenase                  | g6p[c] + nadp[c] -> 6pgl[c] + 3 h[c] + nadph[c]                                                                                 | Rv1121 Rv1447c                              | Pentose Phosphate Pathway |
| GLYt2r      | glycine reversible transport via proton symport    | gly[e] + h[e] <=> gly[c] + h[c]                                                                                                 | Rv1704c                                     | Transport                 |

*Continued on next page*

Table 7 – continued from previous page

| Reaction     | Description                                                            | Formula                                                                                       | Genes                                                                                                                         | Pathways                                |
|--------------|------------------------------------------------------------------------|-----------------------------------------------------------------------------------------------|-------------------------------------------------------------------------------------------------------------------------------|-----------------------------------------|
| GPDDA2       | Glycerophosphodiester phosphodiesterase<br>Glycerophospho-ethanolamine | $g3pe[c] + h2o[c] \rightarrow etha[c] + glyc3p[c] + h[c]$                                     | Rv0317c Rv2277c<br>Rv3842c                                                                                                    | Fatty Acid Metabolism                   |
| GTHOr        | glutathione oxidoreductase                                             | $gthox[c] + h[c] + nadph[c] \rightleftharpoons 2 gthrd[c] + nadp[c]$                          | Rv2855                                                                                                                        | Glutamate Metabolism                    |
| GTPDPK       | GTP diphosphokinase                                                    | $atp[c] + gtp[c] \rightarrow amp[c] + gdptp[c] + h[c]$                                        | Rv2583c                                                                                                                       | Purine Metabolism                       |
| HSDy         | homoserine dehydrogenase NADPH                                         | $hom-L[c] + nadp[c] \rightleftharpoons aspsa[c] + h[c] + nadph[c]$                            | Rv1294                                                                                                                        | Glycine Serine and Threonine Metabolism |
| Kt3r         | potassium proton antiporter                                            | $h[e] + k[c] \rightleftharpoons h[c] + k[e]$                                                  | Rv2691 Rv2692                                                                                                                 | Transport                               |
| LPLIPAL2E160 | Lysophospholipase L2 2 acylglycerophospho-ethanolamine n C160          | $2agpe160[c] + h2o[c] \rightarrow g3pe[c] + h[c] + hdca[c]$                                   | Rv0183                                                                                                                        | Fatty Acid Metabolism                   |
| L-LACD2      | L Lactate dehydrogenase ubiquinone                                     | $lac-L[c] + q8[c] \rightarrow pyr[c] + q8h2[c]$                                               | Rv1872c                                                                                                                       | Pyruvate Metabolism                     |
| MALt2r       | L malate reversible transport via proton symport                       | $h[e] + mal-L[e] \rightleftharpoons h[c] + mal-L[c]$                                          | Rv2443                                                                                                                        | Transport                               |
| ME1          | malic enzyme NAD                                                       | $mal-L[c] + nad[c] \rightarrow co2[c] + nadh[c] + pyr[c]$                                     | Rv2332                                                                                                                        | Pyruvate Metabolism                     |
| MYCTR        | mycothiol reductase nadp dependent                                     | $2 msh[c] + nadp[c] \rightleftharpoons h[c] + mssg[c] + nadph[c]$                             | Rv2855                                                                                                                        | Redox Metabolism                        |
| MYCTR2       | mycothiol reductase glutathione exchange                               | $gthox[c] + 2 msh[c] \rightleftharpoons 2 gthrd[c] + mssg[c]$                                 | Rv2855                                                                                                                        | Redox Metabolism                        |
| NADH2r       | NADH dehydrogenase                                                     | $h[c] + nadh[c] + q[c] \rightleftharpoons nad[c] + qh2[c]$                                    | Rv0082 Rv3145<br>Rv3146 Rv3147<br>Rv3148 Rv3149<br>Rv3150 Rv3151<br>Rv3152 Rv3153<br>Rv3154 Rv3155<br>Rv3156 Rv3157<br>Rv3158 | Redox Metabolism                        |
| NADS2        | NAD synthase glutamine hydrolysing                                     | $atp[c] + dnad[c] + gln-L[c] + h2o[c] \rightarrow amp[c] + glu-L[c] + h[c] + nad[c] + ppi[c]$ | Rv2438c                                                                                                                       | Glutamate Metabolism                    |

*Continued on next page*



Table 7 – continued from previous page

| Reaction   | Description                                                  | Formula                                                               | Genes         | Pathways                        |
|------------|--------------------------------------------------------------|-----------------------------------------------------------------------|---------------|---------------------------------|
| NAKtr      | potassium sodium antiporter                                  | $k[c] + na1[e] \rightleftharpoons k[e] + na1[c]$                      | Rv3236c       | Transport                       |
| NAt3-1     | sodium proton antiporter HNA is 11                           | $h[e] + na1[c] \rightleftharpoons h[c] + na1[e]$                      | Rv2287        | Transport                       |
| NDPK9      | nucleoside diphosphate kinase ATPIDP                         | $atp[c] + idp[c] \rightleftharpoons adp[c] + itp[c]$                  | Rv2445c       | Pyrimidine Metabolism           |
| NNAT       | nicotinate nucleotide adenylyl-transferase                   | $atp[c] + h[c] + nicrnt[c] \rightarrow dnad[c] + ppi[c]$              | Rv2421c       | Pantothenate and CoA Metabolism |
| NNDPR      | nicotinate nucleotide diphosphorylase carboxylating          | $2 h[c] + prpp[c] + quln[c] \rightarrow co2[c] + nicrnt[c] + ppi[c]$  | Rv1596        | Pantothenate and CoA Metabolism |
| ORNt       | ornithine transport via diffusion extracellular to periplasm | $orn[e] \rightleftharpoons orn[c]$                                    | Rv2320c       | Transport                       |
| OXGDC      | 2 oxoglutarate decarboxylase                                 | $akg[c] + h[c] \rightarrow co2[c] + succal[c]$                        | Rv1248c       | Citric Acid Cycle               |
| PGL        | 6 phosphogluconolactonase                                    | $6pgl[c] + h2o[c] \rightarrow 6pgc[c] + h[c]$                         | Rv1445c       | Pentose Phosphate Pathway       |
| PHTO       | phthicol oxygenase                                           | $2 o2[c] + phthclh2[c] \rightarrow 2 h[c] + 2 o2s[c] + phthcl[c]$     |               | Ubiquinone Metabolism           |
| PLIPA1E160 | Phospholipase A1 phosphatidylethanolamine C160               | $h2o[c] + pe160[c] \rightarrow 2agpe160[c] + h[c] + hdca[c]$          |               | Fatty Acid Metabolism           |
| PPDK       | Pyruvate phosphate dikinase                                  | $atp[c] + pi[c] + pyr[c] \rightarrow amp[c] + h[c] + pep[c] + ppi[c]$ | Rv1127c       | Pyruvate Metabolism             |
| PPK2       | polyphosphate kinase                                         | $atp[c] + ppi[c] \rightarrow adp[c] + pppi[c]$                        | Rv2984        | Purine Metabolism               |
| PTAr       | phosphotransacetylase                                        | $accoa[c] + pi[c] \rightleftharpoons actp[c] + coa[c]$                | Rv0408 Rv3914 | Pyruvate Metabolism             |
| QRr        | Quinone reductase                                            | $h[c] + nadph[c] + q[c] \rightleftharpoons nadp[c] + qh2[c]$          | Rv3777        | Redox Metabolism                |
| QULNS      | quinolinate synthase                                         | $dhap[c] + iasp[c] \rightarrow 2 h2o[c] + pi[c] + quln[c]$            | Rv1594        | Pantothenate and CoA Metabolism |
| SERt2r     | L serine reversible transport via proton symport             | $h[e] + ser-L[e] \rightleftharpoons h[c] + ser-L[c]$                  | Rv1704c       | Transport                       |
| SGDS       | Succinylglutamate desuccinylase                              | $h2o[c] + sucglu[c] \rightarrow glu-L[c] + succ[c]$                   |               | Arginine and Proline Metabolism |

Continued on next page

Table 7 – continued from previous page

| Reaction | Description                                 | Formula                                                                  | Genes                 | Pathways                        |
|----------|---------------------------------------------|--------------------------------------------------------------------------|-----------------------|---------------------------------|
| SGSAD    | Succinylglutamic semialdehyde dehydrogenase | $h_2o[c] + nad[c] + sucgsa[c] \rightarrow 2 h[c] + nadh[c] + sucglu[c]$  |                       | Arginine and Proline Metabolism |
| SOTA     | Succinylornithine transaminase              | $akg[c] + sucorn[c] \rightarrow glu-L[c] + sucgsa[c]$                    |                       | Arginine and Proline Metabolism |
| SPODM    | superoxide dismutase                        | $2 h[c] + 2 o_2s[c] \rightarrow h_2o_2[c] + o_2[c]$                      | Rv0432 Rv1908c Rv3846 | Cofactor Metabolism             |
| SSALy    | succinate semialdehyde dehydrogenase NADP   | $h_2o[c] + nadp[c] + succsal[c] \rightarrow 2 h[c] + nadph[c] + succ[c]$ | Rv0234c Rv1731        | Glutamate Metabolism            |
| XYLK     | xylulokinase                                | $atp[c] + xyly-D[c] \rightarrow adp[c] + h[c] + xu5p-D[c]$               | Rv0729                | Sugar Metabolism                |
| PPGPP    | PPGPP-3-pyrophosphohydrolase                | $gdpdp[c] + h_2o[c] \rightarrow gdp[c] + ppi[c]$                         |                       | Purine Metabolism               |

*Continued on next page*

Table 7 – continued from previous page

| Reaction | Description                                                                                                                                                                          | Formula                                                                             | Genes                                                                                                                                                                                                                                                                                                                                                                                                                                                                                                                                                                                                                     | Pathways                      |
|----------|--------------------------------------------------------------------------------------------------------------------------------------------------------------------------------------|-------------------------------------------------------------------------------------|---------------------------------------------------------------------------------------------------------------------------------------------------------------------------------------------------------------------------------------------------------------------------------------------------------------------------------------------------------------------------------------------------------------------------------------------------------------------------------------------------------------------------------------------------------------------------------------------------------------------------|-------------------------------|
| FAD-8    | acyl-CoA dehydrogenase<br>fadE1-36 AND<br>enoyl-CoA hydratase/isomerase<br>echA1-21 AND 3-hydroxyacyl-CoA dehydrogenase<br>fadB2-5 AND<br>acetyl-CoA C-acetyltransferase<br>fadA2-13 | tdcoa[c] + fad[c] + nad[c] + coa[c] -><br>dodcoa[c] + fadh2[c] + nadh[c] + accoa[c] | Rv0131c Rv0154c<br>Rv0215c Rv0231<br>Rv0244c Rv0271c<br>Rv0400c Rv0752c<br>Rv0873 Rv0972c<br>Rv0975c Rv1346<br>Rv1467c Rv1679<br>Rv1933c Rv1934c<br>Rv2724c Rv2789c<br>Rv3061c Rv3139<br>Rv3140 Rv3274c<br>Rv3504 Rv3505<br>Rv3543c Rv3544c<br>Rv3560c Rv3562<br>Rv3563 Rv3564<br>Rv3573c Rv3761c<br>Rv3797 Rv0672<br>Rv2500c Rv0222<br>Rv0456c Rv0632c<br>Rv0673 Rv0675<br>Rv0971c Rv1070c<br>Rv1071c Rv1141c<br>Rv1142c Rv1472<br>Rv1935c Rv2486<br>Rv2679 Rv2831<br>Rv3039c Rv3516<br>Rv3550 Rv3774<br>Rv0905 Rv3374<br>Rv3373 Rv0468<br>Rv1715 Rv1912c<br>Rv3141 Rv0243<br>Rv1074c Rv3546<br>Rv3556c Rv1323<br>Rv0859 | Beta oxidation of fatty acids |
|          |                                                                                                                                                                                      |                                                                                     |                                                                                                                                                                                                                                                                                                                                                                                                                                                                                                                                                                                                                           | <i>Continued on next page</i> |

Table 7 – continued from previous page

| Reaction | Description                                                                                                                                                                          | Formula                                                                                   | Genes                                                                                                                                                                                                                                                                                                                                                                                                                                                                                                                                                                                                                     | Pathways                      |
|----------|--------------------------------------------------------------------------------------------------------------------------------------------------------------------------------------|-------------------------------------------------------------------------------------------|---------------------------------------------------------------------------------------------------------------------------------------------------------------------------------------------------------------------------------------------------------------------------------------------------------------------------------------------------------------------------------------------------------------------------------------------------------------------------------------------------------------------------------------------------------------------------------------------------------------------------|-------------------------------|
| FAD-9    | acyl-CoA dehydrogenase<br>fadE1-36 AND<br>enoyl-CoA hydratase/isomerase<br>echA1-21 AND 3-hydroxyacyl-CoA dehydrogenase<br>fadB2-5 AND<br>acetyl-CoA C-acetyltransferase<br>fadA2-14 | dodcoa[c] + fad[c]<br>+ nad[c] + coa[c] -><br>decoa[c] + fadh2[c] +<br>nadh[c] + accoa[c] | Rv0131c Rv0154c<br>Rv0215c Rv0231<br>Rv0244c Rv0271c<br>Rv0400c Rv0752c<br>Rv0873 Rv0972c<br>Rv0975c Rv1346<br>Rv1467c Rv1679<br>Rv1933c Rv1934c<br>Rv2724c Rv2789c<br>Rv3061c Rv3139<br>Rv3140 Rv3274c<br>Rv3504 Rv3505<br>Rv3543c Rv3544c<br>Rv3560c Rv3562<br>Rv3563 Rv3564<br>Rv3573c Rv3761c<br>Rv3797 Rv0672<br>Rv2500c Rv0222<br>Rv0456c Rv0632c<br>Rv0673 Rv0675<br>Rv0971c Rv1070c<br>Rv1071c Rv1141c<br>Rv1142c Rv1472<br>Rv1935c Rv2486<br>Rv2679 Rv2831<br>Rv3039c Rv3516<br>Rv3550 Rv3774<br>Rv0905 Rv3374<br>Rv3373 Rv0468<br>Rv1715 Rv1912c<br>Rv3141 Rv0243<br>Rv1074c Rv3546<br>Rv3556c Rv1323<br>Rv0859 | Beta oxidation of fatty acids |
|          |                                                                                                                                                                                      |                                                                                           |                                                                                                                                                                                                                                                                                                                                                                                                                                                                                                                                                                                                                           | <i>Continued on next page</i> |

Table 7 – continued from previous page

| Reaction | Description                                                                                                                                                                          | Formula                                                                             | Genes                                                                                                                                                                                                                                                                                                                                                                                                                                                                                                                                                                                                                     | Pathways                      |
|----------|--------------------------------------------------------------------------------------------------------------------------------------------------------------------------------------|-------------------------------------------------------------------------------------|---------------------------------------------------------------------------------------------------------------------------------------------------------------------------------------------------------------------------------------------------------------------------------------------------------------------------------------------------------------------------------------------------------------------------------------------------------------------------------------------------------------------------------------------------------------------------------------------------------------------------|-------------------------------|
| FAD-11   | acyl-CoA dehydrogenase<br>fadE1-36 AND<br>enoyl-CoA hydratase/isomerase<br>echA1-21 AND 3-hydroxyacyl-CoA dehydrogenase<br>fadB2-5 AND<br>acetyl-CoA C-acetyltransferase<br>fadA2-16 | occoa[c] + fad[c] + nad[c] + coa[c] -><br>hexcoa[c] + fadh2[c] + nadh[c] + accoa[c] | Rv0131c Rv0154c<br>Rv0215c Rv0231<br>Rv0244c Rv0271c<br>Rv0400c Rv0752c<br>Rv0873 Rv0972c<br>Rv0975c Rv1346<br>Rv1467c Rv1679<br>Rv1933c Rv1934c<br>Rv2724c Rv2789c<br>Rv3061c Rv3139<br>Rv3140 Rv3274c<br>Rv3504 Rv3505<br>Rv3543c Rv3544c<br>Rv3560c Rv3562<br>Rv3563 Rv3564<br>Rv3573c Rv3761c<br>Rv3797 Rv0672<br>Rv2500c Rv0222<br>Rv0456c Rv0632c<br>Rv0673 Rv0675<br>Rv0971c Rv1070c<br>Rv1071c Rv1141c<br>Rv1142c Rv1472<br>Rv1935c Rv2486<br>Rv2679 Rv2831<br>Rv3039c Rv3516<br>Rv3550 Rv3774<br>Rv0905 Rv3374<br>Rv3373 Rv0468<br>Rv1715 Rv1912c<br>Rv3141 Rv0243<br>Rv1074c Rv3546<br>Rv3556c Rv1323<br>Rv0859 | Beta oxidation of fatty acids |
|          |                                                                                                                                                                                      |                                                                                     |                                                                                                                                                                                                                                                                                                                                                                                                                                                                                                                                                                                                                           | <i>Continued on next page</i> |

Table 7 – continued from previous page

| Reaction | Description                                                                                                                                                                                     | Formula                                                                                      | Genes                                                                                                                                                                                                                                                                                                                                                                                                                                                                                                                                                                                                                     | Pathways                                        |
|----------|-------------------------------------------------------------------------------------------------------------------------------------------------------------------------------------------------|----------------------------------------------------------------------------------------------|---------------------------------------------------------------------------------------------------------------------------------------------------------------------------------------------------------------------------------------------------------------------------------------------------------------------------------------------------------------------------------------------------------------------------------------------------------------------------------------------------------------------------------------------------------------------------------------------------------------------------|-------------------------------------------------|
| FAD-15   | acyl-CoA dehydrogenase<br>fadE1-36 AND<br>enoyl-CoA hydratase/isomerase<br>echA1-21 AND 3-<br>hydroxyacyl-CoA<br>dehydrogenase<br>fadB2-5 AND<br>acetyl-CoA C-<br>acetyltransferase<br>fadA2-20 | hdcoa[c] + fad[c] +<br>nad[c] + coa[c] -><br>c5tetdcoa[c] + fadh2[c]<br>+ nadh[c] + accoa[c] | Rv0131c Rv0154c<br>Rv0215c Rv0231<br>Rv0244c Rv0271c<br>Rv0400c Rv0752c<br>Rv0873 Rv0972c<br>Rv0975c Rv1346<br>Rv1467c Rv1679<br>Rv1933c Rv1934c<br>Rv2724c Rv2789c<br>Rv3061c Rv3139<br>Rv3140 Rv3274c<br>Rv3504 Rv3505<br>Rv3543c Rv3544c<br>Rv3560c Rv3562<br>Rv3563 Rv3564<br>Rv3573c Rv3761c<br>Rv3797 Rv0672<br>Rv2500c Rv0222<br>Rv0456c Rv0632c<br>Rv0673 Rv0675<br>Rv0971c Rv1070c<br>Rv1071c Rv1141c<br>Rv1142c Rv1472<br>Rv1935c Rv2486<br>Rv2679 Rv2831<br>Rv3039c Rv3516<br>Rv3550 Rv3774<br>Rv0905 Rv3374<br>Rv3373 Rv0468<br>Rv1715 Rv1912c<br>Rv3141 Rv0243<br>Rv1074c Rv3546<br>Rv3556c Rv1323<br>Rv0859 | Beta oxidation of<br>unsaturated fatty<br>acids |
|          |                                                                                                                                                                                                 |                                                                                              |                                                                                                                                                                                                                                                                                                                                                                                                                                                                                                                                                                                                                           | <i>Continued on next page</i>                   |

Table 7 – continued from previous page

| Reaction | Description                                                                                                                                                                          | Formula                                                                                         | Genes                                                                                                                                                                                                                                                                                                                                                                                                                                                                                                                                                                                                                     | Pathways                                  |
|----------|--------------------------------------------------------------------------------------------------------------------------------------------------------------------------------------|-------------------------------------------------------------------------------------------------|---------------------------------------------------------------------------------------------------------------------------------------------------------------------------------------------------------------------------------------------------------------------------------------------------------------------------------------------------------------------------------------------------------------------------------------------------------------------------------------------------------------------------------------------------------------------------------------------------------------------------|-------------------------------------------|
| FAD-16   | acyl-CoA dehydrogenase<br>fadE1-36 AND<br>enoyl-CoA hydratase/isomerase<br>echA1-21 AND 3-hydroxyacyl-CoA dehydrogenase<br>fadB2-5 AND<br>acetyl-CoA C-acetyltransferase<br>fadA2-21 | c5tetdcoa[c] + fad[c]<br>+ nad[c] + coa[c] -><br>c3dodcoa[c] + fadh2[c]<br>+ nadh[c] + accoa[c] | Rv0131c Rv0154c<br>Rv0215c Rv0231<br>Rv0244c Rv0271c<br>Rv0400c Rv0752c<br>Rv0873 Rv0972c<br>Rv0975c Rv1346<br>Rv1467c Rv1679<br>Rv1933c Rv1934c<br>Rv2724c Rv2789c<br>Rv3061c Rv3139<br>Rv3140 Rv3274c<br>Rv3504 Rv3505<br>Rv3543c Rv3544c<br>Rv3560c Rv3562<br>Rv3563 Rv3564<br>Rv3573c Rv3761c<br>Rv3797 Rv0672<br>Rv2500c Rv0222<br>Rv0456c Rv0632c<br>Rv0673 Rv0675<br>Rv0971c Rv1070c<br>Rv1071c Rv1141c<br>Rv1142c Rv1472<br>Rv1935c Rv2486<br>Rv2679 Rv2831<br>Rv3039c Rv3516<br>Rv3550 Rv3774<br>Rv0905 Rv3374<br>Rv3373 Rv0468<br>Rv1715 Rv1912c<br>Rv3141 Rv0243<br>Rv1074c Rv3546<br>Rv3556c Rv1323<br>Rv0859 | Beta oxidation of unsaturated fatty acids |

*Continued on next page*

Table 7 – continued from previous page

| Reaction | Description                                                                                                                                                                          | Formula                       | Genes                                                                                                                                                                                                                                                                                                                                                                                                                                                                                                                                                                                                                     | Pathways                                  |
|----------|--------------------------------------------------------------------------------------------------------------------------------------------------------------------------------------|-------------------------------|---------------------------------------------------------------------------------------------------------------------------------------------------------------------------------------------------------------------------------------------------------------------------------------------------------------------------------------------------------------------------------------------------------------------------------------------------------------------------------------------------------------------------------------------------------------------------------------------------------------------------|-------------------------------------------|
| FAD-17   | acyl-CoA dehydrogenase<br>fadE1-36 AND<br>enoyl-CoA hydratase/isomerase<br>echA1-21 AND 3-hydroxyacyl-CoA dehydrogenase<br>fadB2-5 AND<br>acetyl-CoA C-acetyltransferase<br>fadA2-22 | c3dodcoa[c] -><br>t2dodcoa[c] | Rv0131c Rv0154c<br>Rv0215c Rv0231<br>Rv0244c Rv0271c<br>Rv0400c Rv0752c<br>Rv0873 Rv0972c<br>Rv0975c Rv1346<br>Rv1467c Rv1679<br>Rv1933c Rv1934c<br>Rv2724c Rv2789c<br>Rv3061c Rv3139<br>Rv3140 Rv3274c<br>Rv3504 Rv3505<br>Rv3543c Rv3544c<br>Rv3560c Rv3562<br>Rv3563 Rv3564<br>Rv3573c Rv3761c<br>Rv3797 Rv0672<br>Rv2500c Rv0222<br>Rv0456c Rv0632c<br>Rv0673 Rv0675<br>Rv0971c Rv1070c<br>Rv1071c Rv1141c<br>Rv1142c Rv1472<br>Rv1935c Rv2486<br>Rv2679 Rv2831<br>Rv3039c Rv3516<br>Rv3550 Rv3774<br>Rv0905 Rv3374<br>Rv3373 Rv0468<br>Rv1715 Rv1912c<br>Rv3141 Rv0243<br>Rv1074c Rv3546<br>Rv3556c Rv1323<br>Rv0859 | Beta oxidation of unsaturated fatty acids |
|          |                                                                                                                                                                                      |                               |                                                                                                                                                                                                                                                                                                                                                                                                                                                                                                                                                                                                                           | <i>Continued on next page</i>             |



Table 7 – continued from previous page

| Reaction | Description                                                                                                                                                                          | Formula                                             | Genes                                                                                                                                                                                                                                                                                                                                                                                                                                                                                                                                                                                                                     | Pathways                                  |
|----------|--------------------------------------------------------------------------------------------------------------------------------------------------------------------------------------|-----------------------------------------------------|---------------------------------------------------------------------------------------------------------------------------------------------------------------------------------------------------------------------------------------------------------------------------------------------------------------------------------------------------------------------------------------------------------------------------------------------------------------------------------------------------------------------------------------------------------------------------------------------------------------------------|-------------------------------------------|
| FAD-19   | acyl-CoA dehydrogenase<br>fadE1-36 AND<br>enoyl-CoA hydratase/isomerase<br>echA1-21 AND 3-hydroxyacyl-CoA dehydrogenase<br>fadB2-5 AND<br>acetyl-CoA C-acetyltransferase<br>fadA2-24 | d2hdodcoa[c] + nad[c] -> dodcoa[c] + nadh[c]        | Rv0131c Rv0154c<br>Rv0215c Rv0231<br>Rv0244c Rv0271c<br>Rv0400c Rv0752c<br>Rv0873 Rv0972c<br>Rv0975c Rv1346<br>Rv1467c Rv1679<br>Rv1933c Rv1934c<br>Rv2724c Rv2789c<br>Rv3061c Rv3139<br>Rv3140 Rv3274c<br>Rv3504 Rv3505<br>Rv3543c Rv3544c<br>Rv3560c Rv3562<br>Rv3563 Rv3564<br>Rv3573c Rv3761c<br>Rv3797 Rv0672<br>Rv2500c Rv0222<br>Rv0456c Rv0632c<br>Rv0673 Rv0675<br>Rv0971c Rv1070c<br>Rv1071c Rv1141c<br>Rv1142c Rv1472<br>Rv1935c Rv2486<br>Rv2679 Rv2831<br>Rv3039c Rv3516<br>Rv3550 Rv3774<br>Rv0905 Rv3374<br>Rv3373 Rv0468<br>Rv1715 Rv1912c<br>Rv3141 Rv0243<br>Rv1074c Rv3546<br>Rv3556c Rv1323<br>Rv0859 | Beta oxidation of unsaturated fatty acids |
| ALDR     | Aldolase reductase                                                                                                                                                                   | arab-D[c] + nadph[c] + h[c] -> arabl-D[c] + nadp[c] |                                                                                                                                                                                                                                                                                                                                                                                                                                                                                                                                                                                                                           | Arabinogalactan Synthesis                 |
| AL4D     | D-arabinitol 4-dehydrogenase                                                                                                                                                         | arabl-D[c] + nad[c] -> xyly-D[c] + nadh[c] + h[c]   | Rv1928c                                                                                                                                                                                                                                                                                                                                                                                                                                                                                                                                                                                                                   | Arabinogalactan Synthesis                 |

## 14 Table - S22 Metabolic Persister Reactions, Genes and Pathway on Rv3790 Deletion

Table 8: Metabolic persister reactions, gene and pathways on Rv3790 deletion

| Reaction  | Description                                                 | Formula                                                                                                             | Genes                                       | Pathways                                |
|-----------|-------------------------------------------------------------|---------------------------------------------------------------------------------------------------------------------|---------------------------------------------|-----------------------------------------|
| ADK1      | adenylate kinase                                            | $\text{amp}[c] + \text{atp}[c] \rightleftharpoons 2 \text{adp}[c]$                                                  | Rv0733                                      | Purine Metabolism                       |
| AMMQT8-2  | S adenosylmethionine2 demethylmenaquinone methyltransferase | $2\text{dmmq8}[c] + \text{amet}[c] \rightarrow \text{ahcys}[c] + \text{h}[c] + \text{mqn8}[c]$                      |                                             | Ubiquinone Metabolism                   |
| ARI       | arabinose ribose isomerase                                  | $\text{arpp}[c] \rightleftharpoons \text{prpp}[c]$                                                                  |                                             | Membrane Metabolism                     |
| CO2t      | CO2 transporter via diffusion                               | $\text{co2}[e] \rightleftharpoons \text{co2}[c]$                                                                    |                                             | Transport                               |
| DCPDPP2   | decaprenylphosphoryl arabinose phosphate dephosphatase      | $\text{decdpa-tb}[c] + \text{h2o}[c] \rightarrow \text{decda-tb}[c] + \text{pi}[c]$                                 |                                             | Membrane Metabolism                     |
| DCPT2     | phosphoribose transferase undecaprenyl phosphate            | $\text{arpp}[c] + \text{decda-tb}[c] \rightarrow \text{decdpa-tb}[c] + \text{ppi}[c]$                               |                                             | Membrane Metabolism                     |
| DHNAOT    | 1 4 dihydroxy 2 naphthoate octaprenyltransferase            | $\text{dhna}[c] + \text{octdp}[c] \rightarrow 2\text{dmmq8}[c] + \text{co2}[c] + \text{h}[c] + \text{ppi}[c]$       | Rv0534c                                     | Ubiquinone Metabolism                   |
| EX-co2(e) | CO2 exchange                                                | $\text{co2}[e] \rightleftharpoons$                                                                                  |                                             | Exchange                                |
| FORMCOAL  | formyl coa CoA ligase                                       | $\text{atp}[c] + \text{coa}[c] + \text{for}[c] \rightleftharpoons \text{amp}[c] + \text{forcoa}[c] + \text{ppi}[c]$ |                                             | Redox Metabolism                        |
| FRD2      | fumarate reductase                                          | $\text{fum}[c] + \text{mql8}[c] \rightarrow \text{mqn8}[c] + \text{succ}[c]$                                        | Rv0247c Rv0248c Rv3316 Rv3317 Rv3318 Rv3319 | Citric Acid Cycle                       |
| GLXO1     | glyoxylate oxidase                                          | $\text{glx}[c] + \text{h2o}[c] + \text{nad}[c] \rightarrow 2 \text{h}[c] + \text{nadh}[c] + \text{oxa}[c]$          |                                             | Glyoxylate Metabolism                   |
| HSDy      | homoserine dehydrogenase NADPH                              | $\text{hom-L}[c] + \text{nadp}[c] \rightleftharpoons \text{aspsa}[c] + \text{h}[c] + \text{nadph}[c]$               | Rv1294                                      | Glycine Serine and Threonine Metabolism |
| HSK       | homoserine kinase                                           | $\text{atp}[c] + \text{hom-L}[c] \rightarrow \text{adp}[c] + \text{h}[c] + \text{phom}[c]$                          | Rv1296                                      | Glycine Serine and Threonine Metabolism |
| ICHORSi   | Isochorismate Synthase                                      | $\text{chor}[c] \rightarrow \text{ichor}[c]$                                                                        | Rv3215                                      | Ubiquinone Metabolism                   |

*Continued on next page*

Table 8 – continued from previous page

| Reaction | Description                                                    | Formula                                                      | Genes          | Pathways                                |
|----------|----------------------------------------------------------------|--------------------------------------------------------------|----------------|-----------------------------------------|
| MANAT2   | mannosyl acyl transferase                                      | PIM2[c] + pmtcoa[c] -> Ac1PIM2[c] + coa[c]                   | Rv2611c        | PIM Biosynthesis                        |
| NPHS     | naphthoate synthase                                            | sbzcoa[c] -> coa[c] + dhna[c]                                | Rv0548c        | Ubiquinone Metabolism                   |
| OXACOAL  | oxalate coa ligase                                             | atp[c] + coa[c] + oxa[c] <=> amp[c] + oxalcoa[c] + ppi[c]    |                | Glyoxylate Metabolism                   |
| OXCDC    | Oxalyl CoA decarboxylase                                       | h[c] + oxalcoa[c] -> co2[c] + forcoa[c]                      | Rv0118c        | Glyoxylate Metabolism                   |
| SHCHCS   | 2 succinyl 6 hydroxy 2 4 cyclohexadiene 1 carboxylate synthase | ichor[c] + succsal[c] -> 2shchc[c] + pyr[c]                  | Rv0555         | Cofactor Metabolism                     |
| SSALy    | succinate semialdehyde dehydrogenase NADP                      | h2o[c] + nadp[c] + succsal[c] -> 2 h[c] + nadph[c] + succ[c] | Rv0234c Rv1731 | Glutamate Metabolism                    |
| SUCBZL   | o succinylbenzoate CoA ligase                                  | atp[c] + coa[c] + sucbz[c] -> amp[c] + ppi[c] + sbzcoa[c]    | Rv0542c        | Ubiquinone Metabolism                   |
| SUCBZS   | O succinylbenzoate CoA synthase                                | 2shchc[c] -> h2o[c] + sucbz[c]                               | Rv0553         | Ubiquinone Metabolism                   |
| THRS     | threonine synthase                                             | h2o[c] + phom[c] -> pi[c] + thr-L[c]                         | Rv1295         | Glycine Serine and Threonine Metabolism |
